# Supplementary material
Source: publisher figshare collection journal article supplement (https://gsajournals.figshare.com/ndownloader/files/28547751)
Supplement: Supplementary file 1 [file 28547751]

## Sheet: Read Me
Supplemental Table 7. Tup1 peaks identified by ChIP-Seq and their flanking genes.
Definition of columns in the tables:
Peak Number = Number of peak, starting with Peak 1 on chromosome I.
Chromosome = Location
Start = Position on chromosome, start of peak
End = Position on chromosome, end of peak
Length = Size of peak (in nucleotides)
Columns G-J = ChIP mean Log2 Fold Enrichments
Values are averages of triplicate samples for each strain.
Location = Position of peak relative to genomic features (intergenic vs. ORF vs. tRNA/snRNA)
Cluster = Cluster within which the peak is located in Fig 7A
Overlapping gene(s) = Genes that overlap the peak
ChIP Differentials: Changes in Tup1 binding between pairs of strains
Columns O-AC
For each strain comparison:
Base Mean = Average corrected count value across all samples
Log2 FC = Log2 fold change in binding between the two strains (first strain listed relative to second strain listed)
Adj p-value = Adjusted p-value, using the Benjamini Hochberg correction
AF-AR = Genes that are on either side of each peak
Gene 1 = Gene on the left side of the peak; Gene 2 = Gene on the right side of the peak, when viewed in Genome Browser
Base Mean = Average corrected count value across all samples
RNA Differentials: Changes in RNA expression between pairs of strains
Log2 FC = Log2 fold change in RNA expression between the two strains (first strain listed relative to second strain listed)
A value of #N/A means the gene did not have an associated value in the RNA-Seq analysis.
Adj p-values are listed in Table S3, with all genes.
Column AL designates locations where there were multiple peaks within one intergenic region.

## Sheet: Table S7
Supplemental Table 8. Tup1 peaks identified by ChIP-Seq and their flanking genes.																ChIP Differentials																			RNA Differentials							RNA Differentials
						ChIP, mean Log2 Fold Enrichment							Overlapping			Tup1(S649F) a vs WT a				Tup1(S649F) a vs WT a				Tup1 WT a vs Tup1 WT a				Tup1(S649F) a vs Tup1(S649F) a							S649F a vs WT a	S649F a vs WT a	WT a vs WT a	S649F a vs S649F a				S649F a vs WT a	S649F a vs WT a	WT a vs WT a	S649F a vs S649F a
Peak Number	Chromosome	Start	End	Length		Tup1 WT a	Tup1 WT a	Tup1(S649F) a	Tup1(S649F) a		Location	Cluster	Gene(s)			Base Mean	Log2 FC	Adj p-value		Base Mean	Log2 FC	Adj p-value		Base Mean	Log2 FC	Adj p-value		Base Mean	Log2 FC	Adj p-value			Gene 1	Base Mean	Log2 FC	Log2 FC	Log2 FC	Log2 FC		Gene 2	Base Mean	Log2 FC	Log2 FC	Log2 FC	Log2 FC
Tup.1	chrI	2200	3150	950		0.504143	0.46816	1.62832	3.14548		Intergenic	6	YAL067W-A			2299.78	1.67151	1.50268e-25		5849.87	3.0769	5.0979e-114		1100.14	0.0249238	0.99407		7538.93	1.56221	1.04861e-22			YAL067W-A	#N/A	#N/A	#N/A	#N/A	#N/A		YAL067C	75.0094	-1.43522	0.660189	-0.121112	1.9743
Tup.2	chrI	5290	5910	620		0.158183	0.0919105	1.22407	2.31809		Intergenic	5				1128.48	1.64473	1.73902e-26		2040.65	2.53418	3.1292e-46		541.497	-0.0183869	0.99407		2798.45	1.01405	1.08367e-12			YAL067W-A	#N/A	#N/A	#N/A	#N/A	#N/A		YAL067C	75.0094	-1.43522	0.660189	-0.121112	1.9743
Tup.3	chrI	14240	15750	1510		0.92726	0.816076	2.54661	2.84845		Intergenic	6				13204.7	1.66312	2.19121e-14		13438.1	1.66998	2.08293e-16		6014.13	-0.12312	0.99407		21884.8	0.0124303	0.936727			YAL064C-A	54.7347	3.92161	3.26591	0.179259	-0.476438	3 peaks, 1 IG	YAL064W	11.3064	2.09088	1.97979	-0.208519	-0.319612
Tup.4	chrI	17740	18050	310		0.230284	0.125539	0.972874	0.858319		Intergenic	7				659.187	0.911495	1.512e-07		609.89	0.490978	0.00170046		454.394	-0.00341867	0.99407		848.053	-0.287331	0.0891443			YAL064C-A	54.7347	3.92161	3.26591	0.179259	-0.476438	3 peaks, 1 IG	YAL064W	11.3064	2.09088	1.97979	-0.208519	-0.319612
Tup.5	chrI	20400	21560	1160		2.44306	2.27262	2.76286	2.73117		Intergenic	2				19300	0.630291	0.0276673		17158.8	0.382974	0.172071		14157.7	-0.164134	0.99407		23148.8	-0.283836	0.0589008			YAL064C-A	54.7347	3.92161	3.26591	0.179259	-0.476438	3 peaks, 1 IG	YAL064W	11.3064	2.09088	1.97979	-0.208519	-0.319612
Tup.6	chrI	28030	30670	2640		1.20697	1.14655	3.46439	3.54697		Intergenic	6				32368.6	1.7224	1.5488e-10		28924.1	1.45883	7.84773e-10		14350	-0.104784	0.99407		49713.1	-0.239339	0.140243			YAL063C	1094.48	6.59413	6.53357	-0.0579402	-0.118496		YAL062W	104.645	1.58528	1.88073	0.0492337	0.344682
Tup.7	chrI	31870	32340	470		-0.356149	-0.328403	-0.234998	0.779448		ORF	7	GDH3			304.7	0.239315	0.431745		469.704	0.805162	0.00682042		293.212	0.126335	0.99407		500.022	0.837909	4.50265e-06			GDH3	104.645	1.58528	1.88073	0.0492337	0.344682		0	#N/A	#N/A	#N/A	#N/A	#N/A
Tup.8	chrI	32590	33370	780		-0.0741414	0.0254939	1.99698	2.45324		Intergenic	5	GDH3			2591.55	2.97611	1.08179e-46		2977.76	2.8491	2.01575e-33		617.107	0.15208	0.99407		5313.23	0.171817	0.327063			GDH3	183.763	2.53786	1.80502	0.176459	-0.556389		YAL061W	183.763	2.53786	1.80502	0.176459	-0.556389
Tup.9	chrI	34000	35010	1010		0.591521	0.67083	2.79012	2.42858		ORF	6	BDH2			5148.44	2.84585	5.6773e-122		3261.2	1.64707	1.83664e-29		1331.52	0.178003	0.99407		7570.7	-0.883893	1.53349e-09			BDH2	183.763	2.53786	1.80502	0.176459	-0.556389		0	#N/A	#N/A	#N/A	#N/A	#N/A
Tup.10	chrI	45490	45740	250		0.182652	0.145496	-0.222624	0.125632		Intergenic	8				230.199	-0.441475	0.0838813		274.66	-0.396697	0.0431159		271.851	0.0819211	0.99407		233.3	0.259941	0.308052			YAL054C	790.404	-0.00314137	0.0229775	0.00490351	0.0310224		YAL053W	3033.51	0.812021	1.06467	-0.0448911	0.207762
Tup.11	chrI	68140	71380	3240		0.970934	0.860896	0.886249	1.06396		Intergenic	1	CYC3			7009.5	0.01507	0.934278		7010.77	-0.105263	0.548063		6708.07	-0.0862105	0.99407		7456.52	-0.0778756	0.598389			YAL039C	124.741	1.22181	1.76242	-0.227374	0.313231		YAL038W	140394	0.164965	0.116803	0.00524575	-0.0429161
Tup.12	chrI	71620	73520	1900		0.877486	0.712954	-0.110697	-0.463258		ORF	8	CDC19			2164.05	-1.08284	5.01468e-07		1976.13	-1.70498	8.22551e-17		2811.12	-0.106102	0.99407		1246.5	-0.597329	0.00277862			CDC19	140394	0.164965	0.116803	0.00524575	-0.0429161		0	#N/A	#N/A	#N/A	#N/A	#N/A
Tup.13	chrI	73700	74190	490		0.160771	-0.111028	1.54595	0.135212		Intergenic	7	YAL037W			1004.11	1.93562	1.11533e-18		424.607	-0.0167847	0.950967		398.714	-0.122471	0.99407		1088.42	-1.92773	6.34111e-28			YAL037C-A	5370.86	-0.362929	-0.582395	0.0115927	-0.207872		YAL037W	26.4988	-0.258272	0.337667	-0.206975	0.388964
Tup.14	chrI	141560	143240	1680		0.69976	0.592707	-0.158514	-0.617072		Intergenic	8	EFB1			2242.64	-0.538304	0.000899584		1920.1	-1.37776	9.62083e-21		2560.42	-0.0889376	0.99407		1562.56	-0.793443	1.26207e-07			YAL005C	713.623	-0.468663	-0.861461	0.133595	-0.259204		YAL003W	9593.34	-0.471035	-0.548684	-0.089322	-0.166971
Tup.15	chrI	145480	145850	370		-0.335976	-0.301981	1.10356	-0.603743		ORF	7	VPS8			496.649	1.53634	1.02247e-09		250.073	-0.69868	0.0240919		266.048	0.114967	0.99407		501.673	-1.97447	5.0608e-27			VPS8	790.404	-0.00314137	0.0229775	0.00490351	0.0310224		0	#N/A	#N/A	#N/A	#N/A	#N/A
Tup.16	chrI	151390	151660	270		0.271081	0.483081	-0.654311	-0.9355		Intergenic	3				261.113	-0.745627	2.95911e-05		284.225	-1.80137	4.45577e-15		360.253	0.280376	0.99407		173.781	-0.646148	0.00835349			YAL001C	6752.11	-0.0131149	0.251608	-0.0224562	0.242267		YAR002W	502.724	-0.275752	-0.382487	0.000132058	-0.106603
Tup.17	chrI	165400	165960	560		0.372307	0.370204	0.265556	0.673126		Intergenic	7				949.455	-0.209209	0.145915		1136.23	-0.0239513	0.884725		1019.49	0.0155273	0.99407		1083.35	0.336845	0.0280425			YAR008W	327.812	-0.131043	-0.183896	0.00778928	-0.045063	2 peaks, 1 IG	tA(UGC)A	#N/A	#N/A	#N/A	#N/A	#N/A
Tup.18	chrI	166100	166410	310		0.460497	0.300081	-0.190603	-0.563097		tRNA	3	tA(UGC)A			360.906	-0.754008	0.000128036		317.704	-1.26984	1.08849e-10		425.331	-0.158659	0.99407		245.745	-0.544802	0.00982902			YAR008W	6069.8	-0.25969	-0.432498	0.0706863	-0.102121	2 peaks, 1 IG	tA(UGC)A	#N/A	#N/A	#N/A	#N/A	#N/A
Tup.19	chrI	177120	177840	720		-0.171305	-0.140789	3.76544	3.70548		Intergenic	6				10397.8	5.23826	3.1944e-109		8239.3	4.61545	1.17234e-83		557.891	0.105747	0.99407		19481	-0.367225	0.0233588			YAR020C	21793.8	-0.0913248	0.0558473	-0.287668	-0.140496		YAR023C	72.5824	-0.0118434	0.461083	-0.215517	0.257409
Tup.20	chrI	181040	181330	290		0.667762	0.558238	0.166369	0.275972		tRNA	8	SUP56			359.236	-0.455331	0.0258393		355.401	-0.538069	0.000784401		394.326	-0.129098	0.99407		319.935	-0.0742359	0.72895			YAR023C	2533.92	-0.286264	-0.41889	0.0595718	-0.0730542		tL(CAA)A	#N/A	#N/A	#N/A	#N/A	#N/A
Tup.21	chrI	182440	182760	320		0.834112	0.674628	0.0767594	0.306434		tRNA	8	tS(AGA)A			445.285	-0.685794	0.00103525		491.671	-0.496301	0.000273827		529.52	-0.0823992	0.99407		403.872	0.245626	0.208966			tL(CAA)A	6430.12	-0.305097	-0.583079	0.0300697	-0.247912		tS(AGA)A	3.86816	0.0656105	-0.543838	0.194169	-0.415279
Tup.22	chrI	185520	186190	670		1.02294	0.985938	1.17389	2.09694		Intergenic	4				1536.85	0.397214	0.060863		2154.32	1.00794	2.7186e-10		1297.56	-0.0367292	0.99407		2493.94	0.709276	1.12993e-05			YAR028W	5067.54	-0.290921	-0.387342	-0.108805	-0.205226		YAR029W	21.5399	-0.195429	-0.175579	0.26305	0.2829
Tup.23	chrI	189790	191970	2180		0.959137	0.820142	2.21866	2.79489		ORF	6	YAT1			9665.78	1.69287	4.0476e-19		11978.8	1.96713	9.53001e-30		4446.21	-0.049369	0.99407		18275.7	0.356512	0.0221608			YAT1	124.741	1.22181	1.76242	-0.227374	0.313231		0	#N/A	#N/A	#N/A	#N/A	#N/A
Tup.24	chrI	197980	198860	880		1.69549	1.54115	1.78062	1.74752		Intergenic	4				5406.93	0.398719	0.173728		4387.07	-0.229862	0.425043		4427.76	-0.118533	0.99407		5498.28	-0.616746	0.000140233			YAR042W	23272.8	0.156337	0.610985	-0.162193	0.292455	2 peaks, 1 IG	YAR050W	753.527	4.80397	5.47132	-0.281726	0.385628
Tup.25	chrI	202630	203380	750		1.02907	0.814176	3.16261	3.13467		Intergenic	6				4882.85	2.26556	2.05369e-25		4454.88	2.18256	3.16568e-32		1552.51	-0.209478	0.99407		8303.98	-0.15755	0.339459			YAR042W	244.545	0.0695944	0.0661374	0.0869303	0.0834733	2 peaks, 1 IG	YAR050W	753.527	4.80397	5.47132	-0.281726	0.385628
Tup.26	chrI	210780	211640	860		2.97778	2.71703	3.5554	3.3899		Intergenic	2				8907.31	0.555546	0.0649253		7591.35	0.323995	0.266885		6582.36	-0.236034	0.99407		10283.1	-0.341118	0.0265854			YAR050W	168.609	-0.26795	0.272972	0.00905953	0.549981	3 peaks, 1 IG	YAR064W	#N/A	#N/A	#N/A	#N/A	#N/A
Tup.27	chrI	216800	218050	1250		0.917973	0.781698	2.17606	2.5406		Intergenic	6				4523.91	0.884019	0.000652692		4603.15	0.898807	0.000282749		3011.38	-0.125352	0.99407		6403.72	0.0172375	0.91831			YAR050W	28258.6	-0.322044	0.154463	-0.318394	0.158113	3 peaks, 1 IG	YAR064W	#N/A	#N/A	#N/A	#N/A	#N/A
Tup.28	chrI	219950	220800	850		0.575605	0.482329	1.68277	2.17254		Intergenic	5	YAR064W			1780.5	1.28874	2.41374e-15		2257.67	1.51918	5.80315e-25		1036.71	0.0273067	0.99407		3176.6	0.391704	0.0311757			YAR050W	8296.91	-0.167925	-0.130152	-0.32639	-0.288617	3 peaks, 1 IG	YAR064W	#N/A	#N/A	#N/A	#N/A	#N/A
Tup.29	chrI	222960	223320	360		-0.385961	-0.129567	-0.318406	0.680742		Intergenic	7				226.945	0.027222	0.92586		349.902	0.511213	0.1246		241.806	0.194982	0.99407		345.208	0.829858	1.71864e-05			YAR068W	991.047	0.395558	0.311001	-0.0991891	-0.183746	3 peaks, 1 IG	YAR071W	199.572	0.0106871	0.640424	-0.510727	0.11901
Tup.30	chrI	223680	223950	270		-0.1212	-0.206211	0.68953	0.841348		Intergenic	7				303.632	1.09846	1.34383e-06		316.437	0.668714	0.0158517		206.578	0.173799	0.99407		433.028	-0.104396	0.587135			YAR068W	#N/A	#N/A	#N/A	#N/A	#N/A	3 peaks, 1 IG	YAR071W	199.572	0.0106871	0.640424	-0.510727	0.11901
Tup.31	chrI	224850	225640	790		0.454991	0.39202	1.13943	1.80532		Intergenic	5	PHO11			1131.64	0.841992	2.39386e-10		1449.92	1.10353	4.40071e-13		814.172	0.0363285	0.99407		1855.12	0.432673	0.00800264			YAR068W	136.826	-0.0163144	-0.325732	0.184774	-0.124644	3 peaks, 1 IG	YAR071W	199.572	0.0106871	0.640424	-0.510727	0.11901
Tup.32	chrII	8120	8880	760		-0.384462	-0.306241	1.02985	2.58734		Intergenic	5				998.774	1.76934	1.16332e-07		2350.52	2.90155	1.5954e-19		475.078	0.128784	0.99407		3077.23	1.40037	0.000706722			YBL108C-A	300.506	-0.486283	-0.286755	-0.136617	0.062911		tL(UAA)B	#N/A	#N/A	#N/A	#N/A	#N/A
Tup.33	chrII	28430	28790	360		-0.315992	-0.1948	-0.119078	0.431475		Intergenic	7	ECM21	YBL101W-C		268.466	0.422089	0.132732		323.557	0.236353	0.432281		247.919	0.210875	0.99407		355.068	0.171306	0.435562			YBL100W-C	#N/A	#N/A	#N/A	#N/A	#N/A	3 peaks, 1 IG	tF(GAA)B	#N/A	#N/A	#N/A	#N/A	#N/A
Tup.34	chrII	33770	34160	390		1.26846	0.644828	1.18466	-0.331421		Intergenic	8				830.492	-0.0697425	0.81443		420.019	-1.36173	1.09848e-14		692.262	-0.641746	0.196676		565.251	-1.79972	1.26333e-24			YBL100W-C	35974.1	-0.0773731	0.00353968	-0.224313	-0.143401	3 peaks, 1 IG	tF(GAA)B	#N/A	#N/A	#N/A	#N/A	#N/A
Tup.35	chrII	36310	36570	260		0.591662	0.521327	-0.368338	-0.318131		tRNA	8	tF(GAA)B			251.031	-0.875726	1.64911e-06		250.394	-1.18592	8.48058e-15		316.815	-0.0533574	0.99407		178.348	-0.22725	0.314962			YBL100W-C	378.32	0.172613	-0.106649	-0.0694275	-0.348689	3 peaks, 1 IG	tF(GAA)B	#N/A	#N/A	#N/A	#N/A	#N/A
Tup.36	chrII	45640	46560	920		0.502363	0.435987	-0.634629	-0.91923		ORF	3	RPL32			773.34	-1.09953	1.08042e-10		752.606	-1.70977	2.76074e-14		1039.48	-0.0267829	0.99407		455.727	-0.505744	0.0213109			RPL32	5375.2	-0.457248	-0.392463	-0.0927979	-0.0280125		0	#N/A	#N/A	#N/A	#N/A	#N/A
Tup.37	chrII	87950	89120	1170		0.596641	0.565277	-0.635185	-0.863397		snRNA	3	RPS8A			1029.15	-1.22901	1.34959e-12		1012.28	-1.81416	1.04693e-14		1421.23	-0.0245753	0.99407		573.409	-0.481109	0.0288726			YBL074C	601.043	-0.129703	-0.143737	-0.207167	-0.221201		snR56	81.9253	-0.204674	-0.0714188	0.0171348	0.15039
Tup.38	chrII	101130	101630	500		1.04261	0.854649	0.117521	0.215874		Intergenic	8				693.693	-0.649408	3.9215e-05		720.042	-0.832234	3.04893e-08		833.107	-0.0260468	0.99407		572.005	-0.0773422	0.665972			YBL064C	758.686	0.0381309	-0.428701	0.0999006	-0.366932		YBL063W	259.34	-0.0555414	-0.10145	-0.102892	-0.148801
Tup.39	chrII	107380	107760	380		-0.39085	-0.336671	-0.474003	1.45224		Intergenic	7	SKT5			243.686	-0.0983655	0.775077		588.982	1.47926	1.40549e-05		265.636	0.138651	0.99407		595.646	1.87286	1.8531e-16			YBL061C	1053.23	-0.366171	-0.655437	0.0759814	-0.213284		YBL060W	191.47	-0.224161	-0.272136	0.178345	0.13037
Tup.40	chrII	116920	117320	400		0.356059	0.248388	-0.131027	0.261882		Intergenic	8	Tat-D			397.432	-0.318503	0.0983208		488.648	-0.162016	0.339639		450.949	0.0705959	0.99407		440.269	0.362937	0.0643979			YBL055C	9167.56	0.0502655	0.0314653	-0.213833	-0.232634		YBL054W	526.066	0.275971	-0.165071	0.307831	-0.133211
Tup.41	chrII	135780	136620	840		2.90053	2.65372	3.02297	3.55703		Intergenic	2	YBL044W			12362	0.0934301	0.775945		14083.1	0.484166	0.109153		11162.6	-0.164124	0.99407		15760.5	0.352614	0.0496721			YBL045C	8941.66	0.581238	0.428986	-0.0962487	-0.248501		YBL044W	#N/A	#N/A	#N/A	#N/A	#N/A
Tup.42	chrII	140420	141080	660		0.793294	0.62517	0.990796	1.32666		Intergenic	1				1374.19	0.286357	0.10685		1430.48	0.349962	0.00398182		1177.45	-0.127868	0.99407		1684.98	0.066096	0.73315			YBL042C	9837.1	-0.152062	-0.0895328	-0.303904	-0.241374		YBL041W	575.634	-0.178828	-0.0238361	-0.0497535	0.105239
Tup.43	chrII	164120	164390	270		0.411485	0.293507	-0.217904	0.245952		Intergenic	8				303.799	-0.502571	0.0068138		328.521	-0.644094	0.00226859		356.781	0.0119108	0.99407		273.793	0.0069549	0.977525			YBL030C	7255.93	-0.259105	-0.160521	-0.251145	-0.152561		YBL029C-A	112.414	0.557602	0.231607	0.361543	0.0355487
Tup.44	chrII	164790	166170	1380		3.26098	3.01336	3.34474	3.56118		Intergenic	2				28858.9	0.0447474	0.880705		27696.5	-0.117621	0.700228		26938.9	-0.117436	0.99407		30172.9	-0.152984	0.337794			YBL029C-A	127.333	0.324264	0.260346	-0.208853	-0.272771		YBL029W	91.0223	1.6435	1.35505	0.247182	-0.0412752
Tup.45	chrII	168450	169460	1010		0.574834	0.359799	-0.663032	-0.949286		ORF	3	RPL19B			848.576	-1.19187	2.35587e-09		817.187	-1.76993	3.26125e-13		1150.99	-0.0538525	0.99407		477.943	-0.502155	0.033582			RPL19B	5370.86	-0.362929	-0.582395	0.0115927	-0.207872		0	#N/A	#N/A	#N/A	#N/A	#N/A
Tup.46	chrII	192030	192310	280		-0.289536	-0.316364	-0.735175	0.710779		Intergenic	7				210.966	-0.319366	0.331426		331.466	0.461408	0.17281		241.963	0.0898803	0.99407		308.479	1.02081	6.17062e-05			YBL017C	11141.4	0.45786	0.814406	-0.103588	0.252958		YBL016W	555.273	0.113202	1.26934	0.132545	1.28868
Tup.47	chrII	193550	193890	340		0.711294	0.748876	0.342168	0.408503		Intergenic	8				514.261	-0.364547	0.011056		530.633	-0.876829	3.9566e-08		595.091	0.0994012	0.99407		445.511	-0.284269	0.10684			YBL016W	1623.47	-0.168363	-0.678861	-0.24999	-0.760488		YBL015W	603.207	0.930269	1.04971	-0.216778	-0.0973423
Tup.48	chrII	197390	197820	430		0.836429	0.585296	-0.11516	-0.0984066		tRNA	8				506.073	-0.964015	6.38938e-06		481.995	-1.00165	1.09031e-12		618.722	-0.205003	0.99407		358.527	-0.108761	0.570658			YBL015W	221.707	0.304502	0.0652988	0.147568	-0.0916354		tI(AAU)B	#N/A	#N/A	#N/A	#N/A	#N/A
Tup.49	chrII	221640	221930	290		0.307717	0.448479	0.536255	0.375472		Intergenic	8				378.899	0.2444	0.0987363		368.396	-0.607885	0.00051032		371.67	0.203254	0.99407		379.888	-0.513565	0.00506231			YBL005W	3330.29	0.346705	0.338459	-0.00365196	-0.0118987	2 peaks, 1 IG	tS(AGA)B	#N/A	#N/A	#N/A	#N/A	#N/A
Tup.50	chrII	226990	227290	300		0.599213	0.444327	-0.556363	-0.631323		tRNA	3	tS(AGA)B			320.417	-1.12822	3.34451e-09		301.251	-1.4187	2.91049e-15		414.212	-0.156671	0.99407		197.126	-0.311222	0.169242			YBL005W	1350.78	-0.0804945	-0.398396	0.0705302	-0.247371	2 peaks, 1 IG	tS(AGA)B	#N/A	#N/A	#N/A	#N/A	#N/A
Tup.51	chrII	238120	238430	310		0.215097	0.446384	-0.614023	-0.903971		Intergenic	3				287.593	-0.874721	0.000134726		298.254	-1.79755	9.33102e-10		392.785	0.164087	0.99407		181.328	-0.6336	0.0312519			YBL001C	5439.02	-0.315648	-0.14419	-0.419287	-0.247828		YBR001C	487.929	0.331318	0.420958	-0.297557	-0.207917
Tup.52	chrII	245720	245980	260		-0.448942	-0.215688	-0.196208	0.233142		Intergenic	7	RCR1			207.402	0.379524	0.166964		254.401	0.0627614	0.842533		201.893	0.301433	0.99407		266.533	0.135174	0.530452			YBR004C	10084	-0.259518	-0.00739056	-0.311188	-0.0590607		YBR005W	196.791	0.489696	1.1351	-0.135635	0.509769
Tup.53	chrII	251030	251780	750		0.602813	0.518812	1.78629	2.40594		Intergenic	5				2454.53	1.53784	3.47352e-18		3278.28	1.89826	9.89937e-31		1245.56	-0.0122605	0.99407		4773.42	0.486461	0.0134083			YBR007C	6130.28	-0.249064	-0.41024	-0.0775428	-0.238718		YBR008C	338.415	-0.273279	-0.232349	-0.0842077	-0.0432779
Tup.54	chrII	256380	256780	400		0.440802	0.276637	-0.604733	-0.878846		ORF	3	HHT1			403.434	-1.02307	2.489e-08		374.04	-1.71979	2.33629e-11		525.581	-0.0675953	0.99407		237.286	-0.634631	0.0131976			HHT1	713.623	-0.468663	-0.861461	0.133595	-0.259204		0	#N/A	#N/A	#N/A	#N/A	#N/A
Tup.55	chrII	269710	269960	250		0.348932	0.334832	0.462896	0.59952		Intergenic	7				335.164	0.35028	0.0378916		324.178	-0.118138	0.516029		297.471	0.0426019	0.99407		371.029	-0.296038	0.134405			YBR015C	381.519	-0.0725332	0.107297	-0.204555	-0.0247247		YBR016W	272.808	0.381137	-0.120664	0.101074	-0.400726
Tup.56	chrII	278440	278760	320		0.323297	0.270366	0.500703	0.41555		Intergenic	7				445.115	0.316399	0.0378916		446.695	-0.22253	0.131169		412.818	0.126261	0.99407		488.892	-0.275333	0.104043			YBR019C	1406.96	-0.277593	-0.109659	-0.162137	0.00579762		YBR020W	95.5434	-0.105608	-0.0971645	-0.207573	-0.19913
Tup.57	chrII	288040	288360	320		-0.4523	-0.315297	-0.752387	0.686519		Intergenic	7				191.428	-0.231705	0.528682		348.83	0.653116	0.0506181		225.335	0.223957	0.99407		324.924	1.26194	6.97143e-09			YBR023C	190.878	0.0501694	-0.225596	-0.269898	-0.545664		YBR024W	156.68	0.336213	0.777246	-0.169159	0.271874
Tup.58	chrII	292250	292500	250		0.226248	0.434748	0.208492	0.734932		Intergenic	7				276.613	-0.0979075	0.571862		363.121	0.0766356	0.632714		300.62	0.154601	0.99407		345.025	0.464668	0.0133268			YBR025C	348.941	0.192842	0.370887	-0.136958	0.0410875		YBR026C	632.865	0.256392	0.451266	-0.014543	0.180331
Tup.59	chrII	300150	301960	1810		0.891543	0.776534	0.125814	0.24453		Intergenic	8	RPL4A			3182.32	-0.263442	0.218644		3587.23	0.0928998	0.607122		3272.02	-0.143742	0.99407		3559.45	0.344449	0.0206431			YBR031W	101.631	0.499613	0.159947	-0.0244863	-0.364152		YBR033W	70.9514	2.15537	2.40086	-0.114717	0.130775
Tup.60	chrII	326990	327270	280		-0.262507	-0.32165	0.779168	-0.711346		tRNA	8				321.022	1.21486	1.46892e-06		184.609	-0.6369	0.0528399		197.662	0.048886	0.99407		320.31	-1.65018	1.87668e-19			tV(UAC)B	#N/A	#N/A	#N/A	#N/A	#N/A		YBR045C	69.8651	-0.143773	0.0291796	0.0741601	0.247113
Tup.61	chrII	338330	338610	280		-0.0299464	-0.0298286	0.840836	0.663846		Intergenic	7				334.252	0.929976	8.24182e-06		320.787	0.380154	0.0954798		240.104	0.117906	0.99407		432.79	-0.291694	0.139248			YBR050C	58.2297	3.50555	5.5072	-0.347224	1.65443		YBR052C	351.483	0.699516	0.601626	-0.213068	-0.310958
Tup.62	chrII	341100	341380	280		-0.0743393	-0.112979	-0.686575	0.506279		Intergenic	7				196.576	-0.649067	0.0186166		296.758	0.271058	0.285777		240.577	0.00482437	0.995106		256.988	1.06906	5.38079e-07			YBR053C	3467.65	0.613359	1.14108	0.0371401	0.564857	2 peaks, 1 IG	YBR054W	776.119	3.55886	4.45625	-0.355513	0.541877
Tup.63	chrII	341540	343070	1530		-0.0273067	-0.0827794	1.45608	1.48639		Intergenic	5	YRO2			3200.76	1.77772	1.35457e-26		2686.77	1.26823	2.51374e-08		1425.9	-0.0338379	0.99407		4733.17	-0.397405	0.00968231			YBR053C	162.983	2.43279	2.73874	-0.162446	0.143509	2 peaks, 1 IG	YBR054W	776.119	3.55886	4.45625	-0.355513	0.541877
Tup.64	chrII	350750	351190	440		0.514608	0.555584	0.648717	0.683748		tRNA	1				627.732	0.330943	0.0224793		594.808	-0.146778	0.295066		555.657	0.0194136	0.99407		683.796	-0.326947	0.0425705			tQ(UUG)B	#N/A	#N/A	#N/A	#N/A	#N/A		YBR057C	243.063	0.147399	-0.0135052	0.230238	0.0693337
Tup.65	chrII	370800	372040	1240		0.885809	0.831612	1.7504	2.14288		Intergenic	4				3687.59	1.02119	1.60491e-11		3859.91	0.890563	6.52049e-08		2418.34	0.00426566	0.99407		5387.82	0.00616607	0.97542			YBR066C	2512.83	-0.388214	-0.465132	-0.0258879	-0.102806		YBR067C	2023.45	3.24277	3.30566	0.197201	0.260096
Tup.66	chrII	372170	372450	280		-0.0164321	-0.0223679	0.00834643	0.443632		ORF	7	TIP1			222.217	0.0944076	0.618633		266.673	0.0539539	0.842533		224.547	0.125136	0.99407		269.921	0.226714	0.248666			TIP1	2023.45	3.24277	3.30566	0.197201	0.260096		0	#N/A	#N/A	#N/A	#N/A	#N/A
Tup.67	chrII	372740	373850	1110		1.5204	1.38584	2.40013	2.67088		Intergenic	4				7458.62	1.28029	4.40244e-08		6954.95	1.23379	4.01841e-08		4010.59	-0.210446	0.99407		10988.5	-0.127966	0.432691			YBR067C	72.7609	0.180021	0.289456	-0.0648365	0.0445984		YBR068C	6752.11	-0.0131149	0.251608	-0.0224562	0.242267
Tup.68	chrII	374780	376450	1670		0.489761	0.440324	-0.0461218	-0.0934491		ORF	8	BAP2	TAT1		2503.41	0.0785437	0.575136		2594.84	-0.104506	0.315094		2412.12	-0.00642044	0.99407		2740.35	-0.0562706	0.705512			BAP2	6752.11	-0.0131149	0.251608	-0.0224562	0.242267		TAT1	1895.22	-0.321622	-0.737808	-0.14739	-0.563575
Tup.69	chrII	378660	379210	550		0.766883	0.666479	1.79803	2.02368		Intergenic	4				2094.42	1.18765	3.49375e-14		2136.1	1.07622	6.83512e-15		1248.74	-0.0432423	0.99407		3140.04	-0.0210779	0.899183			YBR069C	#N/A	#N/A	#N/A	#N/A	#N/A		YBR070C	208.619	0.128807	0.24441	-0.412475	-0.296873
Tup.70	chrII	379920	380330	410		0.222268	0.225557	0.323977	1.22286		Intergenic	7				520.819	0.426532	0.0109289		755.541	0.825745	2.6016e-07		465.795	0.140399	0.99407		843.791	0.677941	2.91267e-05			YBR070C	200.512	-1.36923	-1.04876	-0.182393	0.138078		YBR071W	833.851	0.244425	0.953141	0.112257	0.820973
Tup.71	chrII	381120	381910	790		-0.252001	-0.182861	2.12092	2.84555		Intergenic	5				2852.94	3.14074	1.44144e-38		4132.06	3.40865	2.19993e-46		609.225	0.130018	0.99407		6859.52	0.539459	0.00433472			YBR071W	183.971	0.96029	1.05907	-0.271761	-0.172978		YBR072W	236.538	3.70353	3.92614	-0.00316484	0.219443
Tup.72	chrII	391310	392000	690		0.541894	0.604219	2.46495	2.79756		ORF	6	SLM4			4384.67	2.98072	4.55858e-50		5030.55	2.86407	5.97561e-85		1032.31	0.153622	0.99407		8977.61	0.173478	0.354501			SLM4	327.812	-0.131043	-0.183896	0.00778928	-0.045063		0	#N/A	#N/A	#N/A	#N/A	#N/A
Tup.73	chrII	392440	393630	1190		0.555076	0.462728	-0.23401	0.0372426		Intergenic	8	ECM33			1440.56	-0.673942	8.91155e-07		1695.79	-0.500391	4.52991e-06		1768.24	0.0155775	0.99407		1356.37	0.323635	0.0251678			YBR077C	4716.76	-0.344102	0.116533	-0.172795	0.28784		YBR078W	23367	0.180103	0.492665	-0.194119	0.118443
Tup.74	chrII	405750	406460	710		0.44084	0.217361	0.107269	0.523316		tRNA	8				834.197	-0.200728	0.16135		910.219	-0.0126542	0.930999		852.066	-0.114926	0.99407		908.261	0.208422	0.194867			tD(GUC)B	5966.46	-0.580537	-1.67763	0.0864308	-1.01066		YBR082C	2026.97	0.0699422	-0.0332368	0.278154	0.174975
Tup.75	chrII	408400	409180	780		1.92388	1.72065	2.14459	2.40809		Intergenic	4				4548.33	0.316117	0.226022		4259.38	0.396404	0.134741		3650.09	-0.280541	0.99407		5346.44	-0.0702872	0.704923			YBR082C	394.751	0.85013	0.744294	-0.111315	-0.217151		YBR083W	512.25	0.121759	0.612206	0.0899728	0.58042
Tup.76	chrII	414380	415130	750		0.444404	0.3747	-0.712376	-0.939346		ORF	3	RPL19A			610.143	-1.13906	6.04543e-11		590.27	-1.69095	2.06544e-14		820.098	-0.0502114	0.99407		356.226	-0.472192	0.0309328			RPL19A	6069.8	-0.25969	-0.432498	0.0706863	-0.102121		0	#N/A	#N/A	#N/A	#N/A	#N/A
Tup.77	chrII	415460	416050	590		0.0905166	0.297868	0.585545	1.06861		Intergenic	7	AAC3			902.379	0.681375	1.06421e-06		1094.4	0.574761	0.000170451		738.946	0.18789	0.99407		1306.89	0.222881	0.144496			YBR084C-A	557.763	0.338318	-0.0821797	0.04685	-0.373648		YBR085W	133.81	1.42529	1.19329	-0.101141	-0.333148
Tup.78	chrII	418000	418480	480		-0.0525154	0.0365163	1.40137	2.08987		Intergenic	5				1032.9	1.96935	2.5766e-31		1366.53	2.16956	4.18504e-25		432.671	0.0840648	0.99407		2096.88	0.426744	0.00784869			YBR085W	134.133	0.351236	0.325076	0.0131757	-0.012985		YBR085C-A	936.837	1.44074	2.07289	-0.0241448	0.608007
Tup.79	chrII	419250	420170	920		-0.0822519	-0.171435	1.37656	1.78501		Intergenic	5				1776.69	1.77704	7.09873e-16		1979.3	1.70708	5.94091e-16		816.836	0.0494155	0.99407		3127.2	0.121846	0.487188			YBR085C-A	758.153	0.0355436	0.594999	-0.126635	0.43282		YBR086C	5399.31	0.0921859	0.0110217	-0.0205251	-0.101689
Tup.80	chrII	428920	429590	670		0.629912	0.579301	0.88876	1.57179		Intergenic	1	PHO3			1428.96	0.678013	4.23583e-06		1615.13	0.817525	1.13241e-07		1068.4	-0.0587974	0.99407		2067.28	0.213771	0.224404			YBR092C	846.481	0.493282	0.398069	-0.04989	-0.145103		YBR093C	2405.92	-0.352022	0.823236	-0.00354948	1.17171
Tup.81	chrII	431090	431600	510		0.637367	0.67266	0.722019	1.70807		Intergenic	1				798.628	0.21212	0.142015		1116.07	0.720304	8.27194e-08		744.329	0.0376045	0.99407		1212.78	0.683356	4.53811e-06			YBR093C	4108.96	0.279334	0.11292	-0.12022	-0.286635		YBR094W	603.09	-0.0130059	0.0126707	-0.0504928	-0.0248162
Tup.82	chrII	465960	467300	1340		1.27148	1.29635	1.00907	1.80939		Intergenic	4				4085.87	-0.129225	0.598566		4612.5	0.063594	0.784774		4130.65	-0.0624364	0.99407		4662.18	0.253633	0.133836			YBR112C	3075.97	-0.219158	-0.519177	0.268638	-0.0313812		YBR114W	439.13	1.28451	1.1925	-0.0069739	-0.0989858
Tup.83	chrII	474000	474300	300		0.639933	0.504543	-0.225523	-0.209123		Intergenic	8				335.32	-0.779708	3.51862e-06		343.87	-1.13671	3.54103e-10		421.895	0.00769536	0.99407		249.634	-0.218875	0.326689			YBR115C	3371.99	-0.245438	-0.344686	-0.0861371	-0.185385		YBR117C	213.678	4.32564	3.55798	-0.0518184	-0.819479
Tup.84	chrII	477190	479150	1960		0.875392	0.747093	-0.218864	-0.317196		ORF	8	TEF2			2294.88	-1.04593	1.99765e-08		2290.47	-1.45807	1.37491e-20		3037.05	-0.0288897	0.99407		1465.81	-0.307453	0.0701742			TEF2	21793.8	-0.0913248	0.0558473	-0.287668	-0.140496		0	#N/A	#N/A	#N/A	#N/A	#N/A
Tup.85	chrII	544280	544810	530		0.450148	0.441231	1.76386	1.68381		Intergenic	5	TBS1			1224.06	1.56186	5.08569e-33		1155.14	0.988412	5.19691e-16		654.635	0.172145	0.99407		1819.34	-0.269076	0.0738622			YBR150C	438.877	-0.155112	1.89456	0.114117	2.16379		YBR151W	686.347	0.188546	0.291164	0.0381364	0.140754
Tup.86	chrII	554280	556360	2080		1.51316	1.46426	2.80758	2.87982		Intergenic	2	ICS2			20387.3	2.13049	6.68132e-18		17843.3	1.75779	1.04181e-13		7397.57	-0.0385688	0.99407		32789.9	-0.281393	0.0739968			YBR157C	2064.62	-0.0575989	0.201921	-0.0581848	0.201335		YBR158W	1815.06	-0.114052	-0.093065	0.0479585	0.0689452
Tup.87	chrII	564780	565200	420		0.30339	0.383592	-0.415471	0.726959		Intergenic	7				433.812	-0.64806	0.00166848		642.702	0.10961	0.432281		540.413	0.0729789	0.99407		542.247	0.96058	4.78868e-07			YBR162C	3229.8	-0.354261	-0.461471	-0.0257765	-0.132986		YBR162W-A	446.5	-0.115756	-0.292494	0.242426	0.0656881
Tup.88	chrII	586200	586590	390		0.0856769	0.167431	1.2886	1.90749		Intergenic	5	FZO1			729.766	1.11833	9.04098e-15		917.224	1.26779	1.0655e-14		470.512	0.0715091	0.99407		1239.95	0.362228	0.0325644			YBR177C	4624.03	-0.212	-0.306298	0.0464459	-0.0478523		YBR179C	422.797	-0.225331	-0.0517141	-0.155754	0.017863
Tup.89	chrII	591540	592450	910		0.419678	0.356263	-0.449297	-0.762757		ORF	3	RPS6B			763.696	-0.796159	1.36751e-07		730.542	-1.4887	1.50649e-12		963.166	-0.00310761	0.99407		508.207	-0.561826	0.00322016			RPS6B	2533.92	-0.286264	-0.41889	0.0595718	-0.0730542		0	#N/A	#N/A	#N/A	#N/A	#N/A
Tup.90	chrII	594870	595990	1120		0.999717	0.937722	1.861	2.21034		Intergenic	4				3758.47	1.28464	1.29185e-11		4218.15	1.33373	2.8763e-17		2156.28	-0.0148156	0.99407		6144.97	0.165496	0.326689			YBR182C-A	169.074	-0.384794	-1.0295	0.16578	-0.478925		YBR183W	345.75	2.10974	2.6886	-0.283559	0.295305
Tup.91	chrII	604300	605520	1220		0.463532	0.433431	-0.757503	-0.986122		ORF	3	RPS9B			1001.02	-1.19178	1.09092e-11		1014.89	-1.74515	3.32986e-13		1391.25	0.014908	0.99407		580.029	-0.411294	0.0697348			RPS9B	6430.12	-0.305097	-0.583079	0.0300697	-0.247912		0	#N/A	#N/A	#N/A	#N/A	#N/A
Tup.92	chrII	606650	607040	390		0.402654	0.283826	-0.699446	-1.01546		ORF	3	RPL21A			296.014	-1.12155	1.44534e-10		298.091	-1.80174	7.73964e-12		408.774	0.0364119	0.99407		172.364	-0.516066	0.0535544			RPL21A	5067.54	-0.290921	-0.387342	-0.108805	-0.205226		0	#N/A	#N/A	#N/A	#N/A	#N/A
Tup.93	chrII	612840	613090	250		0.422588	0.088068	-0.631104	-0.947136		ORF	3	PGI1			194.074	-1.06225	4.56842e-07		163.458	-1.42705	3.23966e-08		237.251	-0.296937	0.99407		115.717	-0.530445	0.0597046			PGI1	23272.8	0.156337	0.610985	-0.162193	0.292455	2 peaks, 1 IG	0	#N/A	#N/A	#N/A	#N/A	#N/A
Tup.94	chrII	613420	613890	470		0.297718	0.259609	-0.797556	-1.11582		ORF	3	PGI1			356.637	-1.13273	5.53579e-11		341.544	-1.80241	2.47968e-16		481.243	-0.0396816	0.99407		202.978	-0.578618	0.0156423			PGI1	23272.8	0.156337	0.610985	-0.162193	0.292455	2 peaks, 1 IG	0	#N/A	#N/A	#N/A	#N/A	#N/A
Tup.95	chrII	614570	614890	320		0.350097	0.366341	-0.432188	-0.729897		Intergenic	3	YBR197C			301.289	-0.821296	5.54395e-08		280.903	-1.58814	6.40236e-11		379.563	-0.0158374	0.99407		193.488	-0.65941	0.00578176			YBR196C-B	13868.5	0.140533	0.688353	-0.167171	0.380649		YBR197C	192.907	0.0163905	-0.175423	-0.0642259	-0.256039
Tup.96	chrII	622870	623230	360		-0.198711	-0.164806	0.784864	-0.157497		Intergenic	7	YBR200W-A			440.903	0.918191	8.30636e-07		291.924	-0.41499	0.101103		301.79	-0.0323192	0.99407		446.392	-1.2193	1.34967e-13			YBR200W-A	3092.9	-0.0868981	6.39232	-6.50777	-0.0285502		YBR201W	137.866	0.294074	-0.122101	0.176886	-0.239289
Tup.97	chrII	624650	625830	1180		1.10042	1.06256	1.95842	2.23614		Intergenic	4	YBR201C-A			5156.91	1.18539	1.39669e-08		5616.45	1.12808	3.50524e-09		3138.22	0.0184596	0.99407		8032.82	0.0916107	0.577506			YBR201C-A	636.508	0.657437	1.30882	-0.181125	0.470262		YBR202W	1096.23	0.201302	-0.224999	-0.146926	-0.573227
Tup.98	chrII	628220	628890	670		1.47457	1.29068	1.32397	1.66841		Intergenic	4	MCM7			2016.15	0.121586	0.571862		2071.69	0.151194	0.489251		1834.5	-0.119187	0.99407		2314.09	0.0402409	0.812461			YBR202W	903.718	-0.116472	-0.0225003	0.0747492	0.168721		YBR203W	876.406	1.68809	1.71102	0.0262812	0.0492177
Tup.99	chrII	642450	643160	710		0.469874	0.342925	1.78522	2.90751		tRNA	6	DUR80			1978.66	1.85784	2.51832e-44		3637.23	2.78879	8.60946e-74		837.193	-0.0489621	0.99407		5106.83	1.02287	3.02698e-11			YBR208C	8280.1	-0.245702	-0.426554	-0.0339668	-0.214819		tC(GCA)B	#N/A	#N/A	#N/A	#N/A	#N/A
Tup.100	chrII	662280	662820	540		0.257004	0.364718	0.982144	1.66422		Intergenic	5	YBR219C			904.608	0.796591	9.02422e-06		1317.71	1.19422	3.60625e-08		687.097	0.125552	0.99407		1615.11	0.661296	0.00207844			YBR218C	936.899	-0.367738	-0.531397	0.288489	0.12483		YBR219C	#N/A	#N/A	#N/A	#N/A	#N/A
Tup.101	chrII	680350	682210	1860		0.609151	0.512876	-0.429598	-0.355025		snRNA	8	snR20			1711.4	-1.055	2.5242e-09		1741.64	-1.22706	2.50196e-17		2239.39	-0.0717263	0.99407		1161.23	-0.108594	0.552525			snR20	256.905	-0.137976	-0.664634	-0.0914182	-0.618076		0	#N/A	#N/A	#N/A	#N/A	#N/A
Tup.102	chrII	692240	692550	310		0.839848	0.259848	0.710894	-0.704919		ORF	8	PRP5			472.31	-0.13596	0.593293		256.885	-1.35737	1.76e-12		410.618	-0.572837	0.27721		321.679	-1.66076	1.57512e-18			PRP5	244.545	0.0695944	0.0661374	0.0869303	0.0834733		0	#N/A	#N/A	#N/A	#N/A	#N/A
Tup.103	chrII	697350	698050	700		0.756467	0.623926	0.808759	1.48768		Intergenic	1				1340.73	0.271382	0.044943		1703.31	0.590298	8.18643e-07		1211.17	0.0138312	0.99407		1897.68	0.465408	0.00137525			YBR238C	175.177	-0.420258	-0.806021	-0.00334357	-0.389106		YBR239C	278.428	0.0698473	0.0832686	0.105494	0.118916
Tup.104	chrII	701990	702650	660		0.684562	0.719103	2.86234	3.12903		Intergenic	6	THI2			3492.64	2.55643	5.80002e-37		3897.98	2.51399	2.79438e-37		1021.75	0.0505126	0.99407		6813.63	0.141148	0.434946			YBR240C	6379.42	-0.266241	-0.370815	0.12564	0.0210658		YBR241C	346.575	0.938223	1.49387	-0.0267021	0.528948
Tup.105	chrII	731260	731720	460		1.39724	0.671058	1.39017	-0.342163		ORF	1	YBR259W			1189.92	0.0867226	0.788415		518.403	-1.27247	2.37148e-13		900.259	-0.802623	0.0840184		826.951	-2.02829	3.2853e-32			YBR259W	168.609	-0.26795	0.272972	0.00905953	0.549981		0	#N/A	#N/A	#N/A	#N/A	#N/A
Tup.106	chrII	788640	788900	260		-0.817712	-0.538742	0.677038	0.467715		Intergenic	7				241.065	1.56447	8.34548e-07		231.712	0.685115	0.0506181		140.987	0.37775	0.99407		349.481	-0.357475	0.129063			YBR293W	605.324	0.38796	0.351378	-0.0396616	-0.0762434		YBR294W	52.6034	0.834651	2.52041	0.720308	2.40607
Tup.107	chrII	792540	792800	260		-0.286127	-0.268362	0.684435	0.289777		Intergenic	7				295.184	1.3499	9.21016e-09		232.423	0.210278	0.474107		180.136	0.208533	0.99407		363.033	-0.779772	7.9524e-06			YBR294W	17236.3	-0.284403	-0.251192	-0.256542	-0.223331		YBR295W	807.851	0.424091	1.2631	-0.0900576	0.748954
Tup.108	chrII	798200	799420	1220		0.417299	0.588452	2.37314	2.80067		Intergenic	6	PHO89			6728.3	2.61461	7.39942e-41		7804.04	2.47202	1.62273e-64		2003.84	0.187493	0.99407		13388.2	0.181483	0.326689			YBR296C	6390.74	-0.323088	-0.350028	-0.14066	-0.1676		YBR296C-A	#N/A	#N/A	#N/A	#N/A	#N/A
Tup.109	chrII	800100	800540	440		0.392515	0.324591	1.18187	1.07948		Intergenic	1	YBR296C-A			901.844	1.30611	5.04198e-18		801.129	0.823914	1.31162e-10		517.616	0.00328963	0.99407		1246.2	-0.341583	0.0240847			YBR296C-A	312.818	0.167056	0.141249	-0.0974962	-0.123304		YBR297W	377.324	1.12971	1.62682	-0.193851	0.303265
Tup.110	chrII	804780	805240	460		0.648538	0.534335	1.28789	1.25381		Intergenic	1	MAL31	YBR298C-A		931.768	1.14301	4.85503e-12		849.542	0.725223	5.13655e-10		575.304	-0.00892527	0.99407		1263.13	-0.290611	0.0626157			YBR298C	3664.29	-0.296429	-0.479539	0.0603506	-0.122759		YBR298C-A	#N/A	#N/A	#N/A	#N/A	#N/A
Tup.111	chrII	808250	809390	1140		-0.233613	-0.155828	2.10494	2.57248		Intergenic	5	PAU24			4225.38	3.39462	3.05338e-67		5285.17	3.37872	3.43288e-38		781.097	0.177058	0.99407		9371.33	0.309453	0.0436596			YBR299W	3266.22	-0.299302	-0.16595	-0.390224	-0.256873		YBR301W	54.2974	3.93736	4.67728	-0.259907	0.480016
Tup.112	chrII	809450	810380	930		0.278952	0.285469	2.40403	2.6975		Intergenic	6				3745.1	2.84753	1.62769e-64		3889.46	2.63725	1.57775e-96		936.472	0.0860049	0.99407		7161.56	0.0146969	0.932842			YBR301W	119386	0.00114855	0.00905135	-0.229463	-0.22156		YBR302C	84.6613	0.485945	0.715217	0.350206	0.579478
Tup.113	chrIII	8840	9170	330		-0.509906	-0.430994	0.784691	1.21965		Intergenic	7				316	1.40732	4.73464e-10		375.224	1.36147	2.94974e-07		181.18	0.118611	0.99407		538.893	0.223359	0.241729			YCL073C	363.53	0.523581	0.25515	-0.1619	-0.430331		YCL069W	#N/A	#N/A	#N/A	#N/A	#N/A
Tup.114	chrIII	29030	29610	580		0.772379	0.18795	-0.443623	-0.636814		Intergenic	3				832.737	-1.38879	1.31954e-17		540.614	-1.14093	2.27615e-09		930.732	-0.852773	4.21843e-15		430.873	-0.471232	0.0170409			YCL055W	4371.47	-0.160642	-0.356498	-0.106738	-0.302594	2 peaks, 1 IG	YCL054W	1220.1	-0.210593	-0.440848	-0.0114733	-0.241729
Tup.115	chrIII	30490	30780	290		-0.100572	0.634017	-0.838131	-0.872966		Intergenic	3				246.591	-0.741534	0.00400446		317.157	-1.52525	4.57601e-14		364.628	0.458385	0.7983		188.105	-0.194363	0.47843			YCL055W	430.016	0.159218	0.259898	-0.0614611	0.0392181	2 peaks, 1 IG	YCL054W	1220.1	-0.210593	-0.440848	-0.0114733	-0.241729
Tup.116	chrIII	40690	41360	670		-0.673462	-0.458035	-0.882633	1.10963		Intergenic	7				388.154	-0.20094	0.549279		905.021	1.22752	0.000551267		450.174	0.217332	0.99407		879.104	1.7986	2.83916e-20			YCL049C	247.004	-0.00924138	0.232666	-0.0921787	0.149729		YCL048W-A	7.81281	2.3909	2.08995	0.163446	-0.137509
Tup.117	chrIII	50500	50810	310		0.407971	0.452952	0.303206	0.565465		Intergenic	8	YCL042W			384.342	-0.170423	0.30414		425.795	-0.324736	0.0428966		414.626	0.0647436	0.99407		398.921	0.0446979	0.816265			YCL043C	2881.52	-0.35496	-0.479239	0.0150155	-0.109263		YCL042W	122.3	1.60108	1.6364	0.256918	0.29224
Tup.118	chrIII	71290	71770	480		-0.500228	-0.417357	-0.894385	2.24766		Intergenic	7	[PIN(_)]			269.804	-0.277135	0.396831		1407.61	2.70408	9.08704e-15		315.885	0.175968	0.99407		1450.27	3.31571	5.02143e-54			YCL028W	9.8919	-0.274163	-0.697243	0.190115	-0.232965		YCL027W	204.386	-1.71275	3.20084	0.384021	5.29761
Tup.119	chrIII	73990	74310	320		0.198684	0.243994	0.423284	1.04807		Intergenic	7				390.935	0.299483	0.0922636		510.695	0.532723	0.00682042		361.881	0.0968077	0.99407		559.097	0.472822	0.0163546			YCL026C-B	89.5409	3.55115	4.03056	-0.00134308	0.478067		YCL026C-A	12.4329	0.513499	1.63086	-0.301768	0.81559
Tup.120	chrIII	78160	79040	880		2.0309	1.90404	0.673613	1.10111		Intergenic	1				3033.39	-1.45256	1.74131e-09		3205.18	-1.35532	2.87192e-08		4260.82	-0.0876266	0.99407		1849.1	0.134284	0.374606			YCL025C	3701.34	-0.216181	-0.601742	0.196736	-0.188824		YCL024W	506.028	0.00806892	0.0621645	-0.155348	-0.101253
Tup.121	chrIII	82440	82740	300		0.4218	0.21316	-0.60209	-0.392943		tRNA	3	tE(UUC)C			295.351	-0.998933	6.66948e-11		291.328	-1.12502	2.93124e-09		374.096	-0.131189	0.99407		205.302	-0.126147	0.583515			tE(UUC)C	614.266	-0.0665888	0.0576438	-0.299048	-0.174815		YCL021W-A	204.532	-0.132463	0.253767	0.0679726	0.454202
Tup.122	chrIII	114330	114580	250		0.32772	0.57982	-0.757872	-0.917704		Intergenic	3				245.63	-0.961271	1.47545e-06		284.063	-1.84601	8.65565e-18		360.036	0.303453	0.989967		156.61	-0.450166	0.0804463			YCL001W-B	441.098	0.236896	-0.357624	0.0151483	-0.579371		YCR002C	677.078	-0.169259	0.0365319	0.0439513	0.249742
Tup.123	chrIII	122680	123080	400		-0.213303	-0.154649	0.093611	0.50831		Intergenic	7				432.519	0.471022	0.0348491		514.387	0.40827	0.0658875		379.119	0.126829	0.99407		587.444	0.200293	0.299285			YCR005C	10428.1	1.11916	1.54401	0.100754	0.5256	2 peaks, 1 IG	tP(AGG)C	36.0832	0.667505	-0.768778	0.603147	-0.833136
Tup.124	chrIII	123490	123780	290		0.716903	0.60771	-0.103759	0.0183414		tRNA	8	SUF2			348.859	-0.85559	2.52004e-05		343.952	-1.05908	1.50955e-09		430.56	-0.0985542	0.99407		254.635	-0.168569	0.428007			YCR005C	180.893	0.338763	0.384023	0.0916702	0.13693	2 peaks, 1 IG	tP(AGG)C	36.0832	0.667505	-0.768778	0.603147	-0.833136
Tup.125	chrIII	127610	127880	270		0.66513	0.664307	-0.287881	-0.269085		tRNA	8	tN(GUU)C			305.776	-0.936854	2.18107e-08		322.244	-1.32814	4.86611e-14		405.423	0.0460781	0.99407		212.405	-0.212661	0.326814			YCR007C	1192.34	0.274287	0.303144	0.207412	0.236269		tN(GUU)C	#N/A	#N/A	#N/A	#N/A	#N/A
Tup.126	chrIII	131690	132180	490		-0.489381	-0.442297	0.255674	1.26663		Intergenic	7				506.299	0.908253	0.000843319		761.893	1.2926	0.000698828		374.216	0.15868	0.99407		942.197	0.705829	0.000916296			YCR009C	9688.78	-0.214431	-0.530054	0.159007	-0.156616		YCR010C	14.5028	1.05035	1.2632	0.80753	1.02038
Tup.127	chrIII	133230	133870	640		0.787606	0.629725	2.231	2.71182		Intergenic	6	ADP1			2589.27	2.10647	1.38454e-35		3200.12	2.32919	1.51087e-50		959.254	-0.0247944	0.99407		5161.7	0.329974	0.065994			YCR010C	12774	0.0122176	0.136403	-0.104854	0.0193314		YCR011C	1673.42	0.0211456	-0.197662	-0.0793614	-0.298169
Tup.128	chrIII	137690	139000	1310		0.660879	0.610944	-0.289453	-0.625644		ORF	3	PGK1			1320.38	-0.951495	4.25459e-07		1262.62	-1.67917	1.9325e-13		1725.19	-0.00599012	0.99407		808.195	-0.602847	0.00491171			PGK1	28258.6	-0.322044	0.154463	-0.318394	0.158113		0	#N/A	#N/A	#N/A	#N/A	#N/A
Tup.129	chrIII	157240	158130	890		0.147134	0.286678	3.9493	4.12648		Intergenic	6				16313.6	5.07034	1.91524e-199		16277.9	4.73212	8.77051e-286		998.524	0.170635	0.99407		34053.9	-0.0260952	0.87775			YCR021C	176.713	0.869438	0.609245	-0.0181963	-0.278389		YCR023C	658.415	-0.0286712	0.0516117	-0.199062	-0.11878
Tup.130	chrIII	162500	164190	1690		0.696761	0.601621	-0.0779963	-0.121664		Intergenic	8	NPP1			2260.32	-0.617152	9.25664e-06		2265.79	-0.881	6.72551e-09		2672.38	-0.0487432	0.99407		1823.05	-0.180902	0.255333			YCR024C-A	587.092	-0.0547192	-0.395371	0.0871545	-0.253497		YCR026C	782.464	-0.0505856	0.0254427	0.0542975	0.130326
Tup.131	chrIII	177490	177900	410		0.452816	0.293187	-0.892873	-0.974877		ORF	3	RPS14A			304.261	-1.27679	3.09666e-11		293.916	-1.67751	9.02103e-12		413.826	-0.0983767	0.99407		171.42	-0.369239	0.169363			RPS14A	8296.91	-0.167925	-0.130152	-0.32639	-0.288617		0	#N/A	#N/A	#N/A	#N/A	#N/A
Tup.132	chrIII	211630	212150	520		-0.0838265	-0.131262	0.544583	2.00269		Intergenic	5	ARE1			540.08	0.908389	0.000505331		1230.03	2.08737	5.60352e-13		397.782	0.15633	0.99407		1456.08	1.48178	3.34001e-16			YCR047C	2956.79	-0.217009	-0.475567	0.0736707	-0.184888		YCR048W	991.047	0.395558	0.311001	-0.0991891	-0.183746
Tup.133	chrIII	212310	212730	420		-0.381489	-0.487338	0.334872	1.37324		ORF	7	ARE1			355.46	1.03474	2.9337e-05		629.181	1.81395	4.02073e-08		241.656	0.0911829	0.99407		786.11	1.0226	6.47466e-11			ARE1	991.047	0.395558	0.311001	-0.0991891	-0.183746		0	#N/A	#N/A	#N/A	#N/A	#N/A
Tup.134	chrIII	225180	225800	620		0.333138	0.269976	0.566561	1.19296		Intergenic	7	YCR062W			847.378	0.222079	0.135167		1072.85	0.480008	0.000802476		790.229	0.0418289	0.99407		1167.08	0.437147	0.0062096			YCR060W	80.9685	0.18065	-0.110091	0.0503596	-0.240382		YCR061W	1052.95	0.59023	0.500529	-0.00121071	-0.0909114
Tup.135	chrIII	226320	227290	970		-0.362647	-0.330198	1.23418	1.93422		ORF	5	YCR062W			1553.4	2.04261	9.11319e-17		2308.96	2.36637	8.36997e-15		639.341	0.141155	0.99407		3438.04	0.615358	4.82198e-05			YCR062W	#N/A	#N/A	#N/A	#N/A	#N/A		0	#N/A	#N/A	#N/A	#N/A	#N/A
Tup.136	chrIII	227810	228250	440		0.922736	0.760251	0.305186	0.402427		tRNA	8	SUP61			609.246	-0.556185	0.00318849		601.681	-0.702926	2.15739e-05		693.476	-0.106723	0.99407		512.958	-0.119047	0.531952			YCR061W	827.97	1.91756	2.00066	0.0427099	0.125816		tS(CGA)C	#N/A	#N/A	#N/A	#N/A	#N/A
Tup.137	chrIII	228500	229180	680		1.42633	1.33449	1.52808	2.06863		ORF	4	BUD31			2574.83	0.359065	0.0607544		3058.48	0.476952	0.0154348		2262.25	0.0365365	0.99407		3487.02	0.284728	0.0595466			BUD31	136.826	-0.0163144	-0.325732	0.184774	-0.124644		0	#N/A	#N/A	#N/A	#N/A	#N/A
Tup.138	chrIII	277770	278020	250		-0.429196	-0.393292	0.708128	-0.739736		ORF	7	MSH3			257.941	1.32633	1.34227e-07		149.834	-0.604502	0.101768		154.77	0.128339	0.99407		262.898	-1.6572	1.904e-16			MSH3	300.506	-0.486283	-0.286755	-0.136617	0.062911		0	#N/A	#N/A	#N/A	#N/A	#N/A
Tup.139	chrIII	295450	295700	250		0.579072	0.48478	-0.217728	-0.081788		tRNA	8	tT(AGU)C			235.105	-0.784596	5.72807e-05		235.169	-0.904657	6.06883e-07		284.554	-0.108919	0.99407		181.514	-0.0933046	0.704923			tT(AGU)C	7006.1	0.705536	1.25025	0.0130369	0.557749		YCR098C	1593.45	3.61857	2.80621	0.0262444	-0.78611
Tup.140	chrIII	298680	299640	960		1.32802	1.33681	2.46173	2.62879		Intergenic	4				4953.54	1.18742	6.43325e-06		5142.88	0.947819	3.02349e-05		3066.41	0.0757667	0.99407		7375.79	-0.0349096	0.83915			YCR098C	455.528	0.76274	2.42954	-0.267722	1.39908		YCR099C	103.621	0.0429994	1.75474	0.0708937	1.78263
Tup.141	chrIII	305580	306070	490		0.565257	0.562027	1.8801	2.43132		Intergenic	6				1433.22	1.80674	9.68531e-34		1706.33	1.84223	1.76524e-30		649.129	0.0749069	0.99407		2651.12	0.245267	0.178978			YCR102C	62.864	2.32221	2.40201	-0.414513	-0.334709	2 peaks, 1 IG	YCR104W	9.24578	1.22428	1.75318	-0.563177	-0.0342793
Tup.142	chrIII	307040	307610	570		-0.320084	-0.239693	1.74515	2.57649		Intergenic	5				1054.77	2.34778	1.78632e-42		1628.45	2.75112	4.5839e-65		361.218	0.132084	0.99407		2488.26	0.669333	0.000278981			YCR102C	242.373	-0.232141	-0.301762	0.131003	0.0613818	2 peaks, 1 IG	YCR104W	9.24578	1.22428	1.75318	-0.563177	-0.0342793
Tup.143	chrIII	308440	308690	250		-0.471368	-0.457088	-0.419416	0.940764		Intergenic	7				139.302	0.0917171	0.781978		254.879	1.1065	0.00323227		140.171	0.0982727	0.99407		264.511	1.26396	3.34455e-09			YCR104W	962.995	-0.335309	-0.885971	0.295356	-0.255306		YCR105W	17.6355	-0.0259409	0.210734	0.0328454	0.269521
Tup.144	chrIV	8940	9390	450		0.25009	0.195422	0.0797695	0.0330375		ORF	8	SOR2			392.965	0.127181	0.498515		392.313	-0.353354	0.118778		383.863	0.0711195	0.99407		407.535	-0.276216	0.170278			SOR2	#N/A	#N/A	#N/A	#N/A	#N/A		0	#N/A	#N/A	#N/A	#N/A	#N/A
Tup.145	chrIV	9520	11060	1540		2.16581	1.98574	1.6012	1.6074		Intergenic	4				12589.2	0.31296	0.309215		11368	-0.0520068	0.870284		10725	-0.0932062	0.99407		13556.1	-0.334496	0.0245913			YDL246C	5.18645	-0.152769	-0.0449274	-0.113206	-0.00536422		YDL245C	28.6982	4.90725	5.29865	0	0.366137
Tup.146	chrIV	12930	14530	1600		2.27436	2.14498	1.4443	1.63126		Intergenic	4	HXT15			21275.1	0.0893693	0.780926		20887.7	-0.0988274	0.744865		19853.9	-0.070212	0.99407		22712.9	-0.130377	0.46315			YDL245C	13077	0.235304	-0.0701301	-0.00149178	-0.306926		YDL244W	24.1845	0.795756	1.82923	-0.0771082	0.956363
Tup.147	chrIV	19890	20600	710		0.299399	0.276072	1.57893	2.25576		Intergenic	5	YDL241W			1407.07	1.59164	7.82669e-30		1863.26	1.80634	1.07713e-27		720.234	0.0872944	0.99407		2708.3	0.441895	0.00832236			YDL243C	13077	0.235304	-0.0701301	-0.00149178	-0.306926		YDL241W	218.083	1.12786	1.76695	0.232903	0.871989
Tup.148	chrIV	44110	45860	1750		0.490416	0.31135	-0.614354	-0.765135		ORF	3	SSB1			1483.74	-1.09598	5.76263e-09		1405.5	-1.53401	1.87263e-12		1938.36	-0.105283	0.99407		897.604	-0.409564	0.0483733			SSB1	35974.1	-0.0773731	0.00353968	-0.224313	-0.143401		0	#N/A	#N/A	#N/A	#N/A	#N/A
Tup.149	chrIV	48500	50330	1830		1.23306	0.898338	0.961662	0.936633		Intergenic	1				4380.5	-0.24901	0.282317		3795.93	-0.316127	0.0639023		4237.37	-0.319262	0.99407		3991.49	-0.25913	0.0849421			YDL227C	18917.6	-0.438961	0.583209	-0.0064321	1.01574		YDL226C	737.601	-0.26967	-0.538674	-0.128761	-0.397765
Tup.150	chrIV	62130	62550	420		0.103135	-0.00892275	0.254789	0.982081		ORF	7	CDC13			444.132	0.562614	0.00949269		560.283	0.755233	0.00175573		365.742	0.0574974	0.99407		665.667	0.387893	0.0409492			CDC13	378.32	0.172613	-0.106649	-0.0694275	-0.348689		0	#N/A	#N/A	#N/A	#N/A	#N/A
Tup.151	chrIV	74160	74680	520		0.218783	0.274685	-0.406103	-0.28808		Intergenic	3	PRR2			412.322	-0.59231	0.00176807		495.584	-1.08413	2.09374e-12		548.541	0.288265	0.99407		348.801	-0.0676508	0.743503			YDL215C	1789.8	-0.313793	-0.291217	-0.182796	-0.160221		YDL214C	143.678	3.38176	3.4655	-0.262979	-0.179231
Tup.152	chrIV	76610	77510	900		1.70218	1.49433	2.92438	3.59524		Intergenic	2	NOP6			7375.04	1.78495	2.35109e-11		8714.4	2.03107	5.63481e-16		3173.26	-0.0933099	0.99407		13732.3	0.281362	0.105154			YDL214C	64.7256	1.42797	1.06298	0.16664	-0.198344		YDL213C	335.608	-0.055745	-0.272399	0.216463	-0.000191259
Tup.153	chrIV	130120	130560	440		0.470469	0.415649	-0.809536	-0.930643		ORF	3	RPL41A			403.232	-1.28882	4.26882e-09		386.857	-1.86971	4.53967e-13		555.81	-0.0638456	0.99407		215.971	-0.518969	0.0625279			RPL41A	1874.2	-0.505642	-0.141999	-0.334157	0.0294866		0	#N/A	#N/A	#N/A	#N/A	#N/A
Tup.154	chrIV	132650	133270	620		1.05139	1.0216	0.332783	0.493415		Intergenic	1				1152.93	-0.735955	8.17591e-07		1188.22	-0.894908	5.67618e-08		1406.11	-0.0456804	0.99407		916.835	-0.0765815	0.636985			YDL183C	495.137	0.402606	0.461663	-0.0619942	-0.00293712		YDL182W	591.212	0.32722	0.663323	-0.195719	0.140384
Tup.155	chrIV	156010	156340	330		0.658709	0.847673	0.245991	0.723445		Intergenic	1				472.007	-0.390912	0.00930633		564.958	-0.364107	0.0063669		550.461	0.0997636	0.99407		488.179	0.258157	0.151862			YDL171C	7174.7	-0.302281	-0.322201	-0.152946	-0.172866		YDL170W	244.538	0.0662325	0.831123	-0.104076	0.660814
Tup.156	chrIV	212550	213130	580		-0.127535	-0.148266	0.65855	1.79116		Intergenic	5				773.319	1.02267	4.22249e-07		1335.16	1.76843	2.58181e-13		526.283	0.087825	0.99407		1673.47	0.981439	4.20187e-11			YDL139C	98.7786	1.13411	1.29421	0.0923939	0.252489		YDL138W	558.829	0.649019	0.414708	0.11117	-0.123141
Tup.157	chrIV	221370	222150	780		0.312591	0.227277	-0.71734	-0.810933		Intergenic	3	RPL41B			710.17	-0.996785	9.24519e-06		711.611	-1.54833	1.93328e-12		945.1	0.00957761	0.99407		451.611	-0.410566	0.0842608			YDL133C-A	98.7786	1.13411	1.29421	0.0923939	0.252489		YDL133W	265.548	0.106783	0.127656	-0.00856881	0.0123043
Tup.158	chrIV	229810	230990	1180		0.727192	0.637782	-0.0852112	0.0199339		Intergenic	8	RPLA3			1473.93	-0.448676	0.00251458		1524.77	-0.692221	4.08074e-08		1686.43	-0.00220952	0.99407		1303.23	-0.11653	0.455657			YDL130W	#N/A	#N/A	#N/A	#N/A	#N/A		YDL129W	182.697	1.07531	0.0511495	0.367256	-0.656907
Tup.159	chrIV	232280	232770	490		-0.239726	-0.314423	-0.270938	0.778756		Intergenic	7	VCX1			381.253	0.158529	0.534773		559.685	0.567413	0.0450788		381.983	0.161738	0.99407		577.318	0.714722	5.37052e-05			YDL129W	572.323	-0.0918392	-0.152793	-0.0178605	-0.0788141		YDL128W	1667.47	0.543574	0.277118	-0.118192	-0.384649
Tup.160	chrIV	234220	234800	580		1.03628	0.959888	0.322055	1.46516		Intergenic	1				1020.06	-0.561729	0.000253534		1380.32	0.224014	0.177083		1172.83	-0.0798314	0.99407		1248	0.837293	6.73462e-09			YDL128W	6993.95	-0.356189	-0.496057	-0.0709492	-0.210818		YDL127W	237.384	0.236386	1.43753	0.199134	1.40028
Tup.161	chrIV	296210	296620	410		0.0872345	0.225502	-0.00212026	1.94629		Intergenic	7	NUR1	RAM1		372.271	0.1291	0.523478		969.19	1.69778	8.05713e-14		382.077	0.204411	0.99407		1009.62	1.91924	1.48941e-26			YDL090C	19540	-0.341331	-0.101992	-0.169555	0.0697831		YDL089W	267.454	-0.041534	0.570764	-0.105877	0.506421
Tup.162	chrIV	302740	303090	350		-0.18574	-0.293294	0.0597571	1.18621		Intergenic	7				282.206	0.393098	0.182673		469.942	1.20142	0.0001433		249.711	0.0607397	0.99407		526.367	1.01861	4.22525e-07			YDL085C-A	217.086	0.573204	0.83512	-0.0705237	0.191393		YDL085W	112.454	4.24291	4.11613	0.444824	0.318049
Tup.163	chrIV	309580	310060	480		0.440767	0.388393	-0.746045	-0.962388		Intergenic	3	RPP1A			383.73	-1.12546	8.71286e-10		388.7	-1.79573	3.1124e-22		531.195	0.0471937	0.99407		224.074	-0.491039	0.0319873			YDL082W	89.9282	-0.123528	-0.0691891	-0.17434	-0.120001		YDL081C	5856.11	-0.245696	-0.133816	-0.302475	-0.190594
Tup.164	chrIV	312650	312990	340		-0.528444	-0.495106	0.709818	1.16627		Intergenic	7	MRK1			370.072	1.25878	0.000162635		445.399	1.24718	0.000677531		228.062	0.104779	0.99407		619.233	0.253924	0.166573			YDL080C	1409.11	-1.36554	-0.878212	0.0585988	0.545922		YDL079C	106.813	2.04625	1.87539	-0.0954237	-0.266277
Tup.165	chrIV	314680	315380	700		-0.0518607	-0.0878706	2.75582	2.62166		Intergenic	6	MDH3	MRK1		3918.24	3.78282	1.55667e-93		2943.9	3.04332	6.6223e-39		550.392	0.103844	0.99407		6793.94	-0.489822	0.00147609			YDL079C	#N/A	#N/A	#N/A	#N/A	#N/A		YDL078C	601.043	-0.129703	-0.143737	-0.207167	-0.221201
Tup.166	chrIV	315540	315790	250		-0.413332	-0.31074	0.554364	0.349988		ORF	7	MDH3			267.006	1.33739	2.00559e-05		236.638	0.58961	0.125147		160.723	0.151175	0.99407		360.64	-0.449504	0.033634			MDH3	601.043	-0.129703	-0.143737	-0.207167	-0.221201		0	#N/A	#N/A	#N/A	#N/A	#N/A
Tup.167	chrIV	322670	323420	750		0.515588	0.363371	-0.613355	-0.968034		snRNA	3	RPL31A	SNR63		631.597	-1.13508	4.15598e-11		617.689	-1.78137	4.53967e-13		859.216	-0.014517	0.99407		363.357	-0.531072	0.0245913			YDL075W	9671.75	-0.096933	0.158553	-0.302285	-0.046799		snR63	2485.29	0.0488468	0.0499765	0.0543813	0.0555109
Tup.168	chrIV	330910	331430	520		0.472924	0.466322	-0.736683	-0.80571		ORF	3	BDF2			405.656	-1.20593	2.10362e-12		414.824	-1.62078	1.32843e-18		561.08	-9.35354e-05	0.999244		242.491	-0.288557	0.193992			BDF2	758.686	0.0381309	-0.428701	0.0999006	-0.366932		0	#N/A	#N/A	#N/A	#N/A	#N/A
Tup.169	chrIV	342660	343010	350		0.828466	0.198223	0.489391	-0.84904		ORF	8	TSR1			466.096	-0.206662	0.39206		276.156	-1.57306	2.67711e-12		432.848	-0.429401	0.976807		308.866	-1.66126	5.90236e-17			TSR1	1053.23	-0.366171	-0.655437	0.0759814	-0.213284		0	#N/A	#N/A	#N/A	#N/A	#N/A
Tup.170	chrIV	355520	357850	2330		0.680892	0.581667	0.164834	0.220732		Intergenic	8	PSA1			3756.58	0.238974	0.109819		4111.03	0.301471	0.0107282		3357.37	-0.0522673	0.99407		4649.68	0.145041	0.326999			YDL055C	3459.85	-0.210658	-0.195623	-0.249673	-0.234639	2 peaks, 1 IG	tK(UUU)D	8.61303	-0.41302	-0.639905	0.104574	-0.122312
Tup.171	chrIV	359440	359770	330		0.827018	0.615079	-0.0509333	-0.218539		tRNA	8	tK(UUU)D			371.923	-0.910861	4.23192e-08		331.908	-1.1158	8.41758e-11		444.172	-0.24173	0.99407		252.609	-0.315715	0.117334			YDL055C	8786.4	0.0952509	0.692451	-0.0424495	0.554751	2 peaks, 1 IG	tK(UUU)D	8.61303	-0.41302	-0.639905	0.104574	-0.122312
Tup.172	chrIV	365970	366640	670		0.489045	0.491529	1.55023	1.90609		Intergenic	5				1652.66	1.33199	8.76656e-25		1857.94	1.4003	2.89864e-28		923.744	-0.0308929	0.99407		2735.52	0.17246	0.285373			YDL049C	#N/A	#N/A	#N/A	#N/A	#N/A		YDL048C	353.784	3.0751	2.58284	0.503463	0.0112015
Tup.173	chrIV	368240	369390	1150		1.49255	1.44487	2.14606	2.6253		Intergenic	4				5590.72	0.771221	0.00131097		5772.3	0.915597	0.000115881		3832.39	-0.187727	0.99407		7893.31	0.0830672	0.621511			YDL048C	349.095	0.260481	1.61567	0.0519787	1.40717		YDL047W	642.955	0.116813	-0.162406	0.0066813	-0.272537
Tup.174	chrIV	381500	381990	490		0.163137	-0.150018	1.56923	0.0889867		Intergenic	7				959.198	1.77096	3.80876e-14		406.654	-0.0343021	0.89241		401.441	-0.240457	0.99407		1018.27	-1.89968	1.37947e-27			YDL040C	1547.36	-0.0760393	-0.706842	-0.0633905	-0.694193		YDL039C	464.422	3.50931	2.43395	1.18082	0.105456
Tup.175	chrIV	385730	387660	1930		2.43779	2.13004	3.17012	2.99387		Intergenic	2				26478.4	1.00999	0.000620668		21801.9	0.718624	0.00613703		16051.6	-0.230146	0.99407		33763.4	-0.395738	0.0143124			YDL037C	592.958	1.96589	2.78434	-0.0719868	0.746461		YDL036C	189.11	-0.489956	-0.702167	0.0597169	-0.152494
Tup.176	chrIV	407480	408020	540		-0.421606	-0.420795	0.437507	1.6259		Intergenic	7				534.57	0.973447	0.000223857		1015	1.8015	2.51374e-08		383.212	0.162655	0.99407		1234.72	1.14	4.81352e-10			YDL025C	751.715	4.0236	4.27361	-0.237759	0.0122511		YDL024C	69.4792	1.84424	2.23283	0.437713	0.826306
Tup.177	chrIV	410260	410670	410		0.5388	0.50791	-0.154976	0.00605915		tRNA	8				429.574	-0.768579	3.0577e-06		443.132	-0.965145	2.98744e-13		530.934	-0.0365039	0.99407		333.542	-0.0958375	0.621887			YDL024C	11232.5	-0.13424	-0.461215	-0.0112627	-0.338238		tA(AGC)D	#N/A	#N/A	#N/A	#N/A	#N/A
Tup.178	chrIV	410800	411680	880		0.883864	0.79254	1.00144	1.76187		Intergenic	1				1779.51	0.296077	0.0646592		2330.64	0.567109	0.00126166		1633.3	0.0859746	0.99407		2564.69	0.492669	0.0062096			tA(AGC)D	159.112	-0.163879	-0.637938	0.0935307	-0.380528		YDL022W	1615.2	1.52848	1.93456	-0.0320218	0.374056
Tup.179	chrIV	434110	434430	320		0.614538	0.593678	-0.401609	-0.512216		tRNA	3	tT(AGU)D			340.862	-1.00493	5.45869e-10		330.663	-1.43235	4.20315e-13		441.479	-0.0611845	0.99407		219.114	-0.362423	0.0942889			YDL008W	83.1912	-0.233461	0.871847	-0.255641	0.849666		tT(AGU)D	10.5885	0.116575	-0.575681	0.129045	-0.563212
Tup.180	chrIV	449590	449940	350		0.764266	0.82224	-0.309349	-0.690103		Intergenic	3				408.663	-1.07884	1.06657e-08		406.399	-1.90336	4.81213e-20		561.717	0.0628733	0.99407		234.352	-0.634485	0.00504149			YDL001W	709.705	0.421422	0.883503	-0.012843	0.449239		YDR001C	1169.59	0.57051	1.41141	-0.0520591	0.788844
Tup.181	chrIV	464950	465640	690		3.04206	2.7625	2.14487	1.82887		Intergenic	2	GAL3			6679.31	-0.979658	0.000489166		5638.71	-1.54586	5.55314e-08		8140.94	-0.216008	0.99407		3987.7	-0.659846	3.84177e-06			YDR009W	485.541	-0.107238	-0.104704	-0.0749472	-0.0724124		YDR011W	5814.14	0.689797	1.05046	-0.0887517	0.271907
Tup.182	chrIV	472270	472850	580		0.536424	0.374901	-0.559002	-0.543396		ORF	3	RPL4B			537.82	-1.10946	1.77023e-12		527.773	-1.47433	6.11712e-12		712.308	-0.074864	0.99407		334.551	-0.310449	0.147986			RPL4B	9167.56	0.0502655	0.0314653	-0.213833	-0.232634		0	#N/A	#N/A	#N/A	#N/A	#N/A
Tup.183	chrIV	488610	489110	500		0.744173	0.472005	-0.346456	-0.549647		tRNA	3				523.92	-1.06964	1.02424e-11		486.965	-1.50103	2.6797e-20		673.947	-0.126836	0.99407		320.111	-0.428926	0.0249056			YDR022C	5817.57	-0.428517	-0.505846	-0.0757731	-0.153102		tV(UAC)D	9.6039	0.0501112	-0.936235	0.217691	-0.768656
Tup.184	chrIV	506000	506520	520		-0.322339	-0.167097	0.796896	1.28398		Intergenic	7				720.227	1.31013	7.66844e-08		905.28	1.34398	2.05573e-06		436.321	0.141067	0.99407		1256.55	0.3201	0.0657034			YDR032C	183.012	0.425949	0.25387	0.143845	-0.0282338	2 peaks, 1 IG	YDR033W	8941.66	0.581238	0.428986	-0.0962487	-0.248501
Tup.185	chrIV	506840	507790	950		0.121953	-0.00851079	0.293501	0.745652		Intergenic	7				1176.95	0.270712	0.103909		1280.19	0.192805	0.346661		1066.44	0.00596265	0.99407		1432.97	0.0653504	0.704923			YDR032C	198.647	0.360585	2.71983	0.155968	2.51521	2 peaks, 1 IG	YDR033W	8941.66	0.581238	0.428986	-0.0962487	-0.248501
Tup.186	chrIV	508070	508740	670		0.416207	0.23735	-0.76568	-1.19371		ORF	3	MRH1			537.244	-1.09038	2.42199e-11		503.99	-1.82871	3.62698e-10		714.83	-0.0512981	0.99407		304.738	-0.662924	0.0105216			MRH1	8941.66	0.581238	0.428986	-0.0962487	-0.248501		0	#N/A	#N/A	#N/A	#N/A	#N/A
Tup.187	chrIV	509510	509800	290		0.537817	0.554286	0.639555	0.864028		Intergenic	1	LYS14	MRH1		406.702	0.240677	0.179091		448.289	0.111163	0.497757		378.474	0.059328	0.99407		489.102	0.0682312	0.736405			YDR033W	20880.5	-0.0118984	-0.0797858	-0.0845947	-0.152482		YDR034C	530.551	0.00781738	-0.0360547	0.0637538	0.0198818
Tup.188	chrIV	515120	515520	400		0.951975	0.457015	0.830068	-0.609603		Intergenic	8				859.751	-0.0891603	0.759547		439.252	-1.38511	4.15534e-18		724.015	-0.631143	0.167475		581.594	-1.79013	5.12079e-25			YDR034C	20880.5	-0.0118984	-0.0797858	-0.0845947	-0.152482		tL(UAA)D	#N/A	#N/A	#N/A	#N/A	#N/A
Tup.189	chrIV	520880	521140	260		0.674138	0.550204	-0.411254	-0.468212		tRNA	3	tQ(UUG)D1			266.579	-1.05174	6.89221e-08		256.356	-1.3785	7.6221e-14		343.978	-0.1058	0.99407		170.624	-0.298479	0.20701			YDR034C-A	352.12	-0.165996	-0.377332	0.0260857	-0.18525		tQ(UUG)D	#N/A	#N/A	#N/A	#N/A	#N/A
Tup.190	chrIV	538700	539760	1060		2.35701	2.34207	3.91668	3.99218		Intergenic	2				23743.8	1.78441	1.36896e-10		20844.9	1.37307	3.73584e-06		10479.4	-0.0181806	0.99407		36149.8	-0.303306	0.0570908			YDR040C	3923.62	-0.174203	-0.598579	0.204523	-0.219853		YDR041W	227.608	0.00913328	0.264552	-0.0379629	0.217455
Tup.191	chrIV	541310	541940	630		0.767099	0.704363	-0.0920529	-0.243073		snRNA	8				777.958	-0.966058	2.54969e-08		778.206	-1.39002	2.05754e-26		1014.28	-0.017977	0.99407		516.475	-0.307197	0.0739384			YDR042C	8478.8	-0.417997	-0.344522	-0.227516	-0.154041		snR47	153.757	0.219406	-0.0396457	0.00270294	-0.256348
Tup.192	chrIV	542130	542660	530		0.185592	0.176942	1.52954	0.716321		Intergenic	5				1220.43	1.74867	2.1548e-29		742.69	0.150053	0.442222		593.826	0.174914	0.99407		1442.28	-1.29052	2.43439e-17			snR47	210.668	-0.222026	-0.270195	0.151048	0.10288		YDR043C	306.46	2.31447	2.54381	0.199828	0.42917
Tup.193	chrIV	543460	544760	1300		1.17009	1.04708	2.17357	2.4643		Intergenic	4				6421.66	0.631423	0.00728214		6752.04	0.648886	0.00764836		4846.99	-0.0799724	0.99407		8673.52	0.0667978	0.690456			YDR043C	63.5281	-0.147371	0.0602632	0.0288688	0.236503	3 peaks, 1 IG	YDR044W	1386.95	1.563	1.44939	0.0959699	-0.0176331
Tup.194	chrIV	545110	545520	410		-0.335963	-0.298207	0.389099	0.744127		Intergenic	7				476.213	1.11498	2.47786e-06		490.32	0.810265	0.00745878		310.205	0.0789823	0.99407		689.006	-0.0778908	0.648586			YDR043C	152.055	0.0146052	0.244365	0.031341	0.261101	3 peaks, 1 IG	YDR044W	1386.95	1.563	1.44939	0.0959699	-0.0176331
Tup.195	chrIV	545810	546670	860		0.714557	0.719581	1.82144	2.45279		Intergenic	4	HEM13			2765.37	1.26061	1.31629e-15		3687.07	1.63914	1.75699e-30		1609.87	-0.0100344	0.99407		5123.48	0.503366	0.00162438			YDR043C	419.417	0.936589	1.99094	-0.270281	0.784068	3 peaks, 1 IG	YDR044W	1386.95	1.563	1.44939	0.0959699	-0.0176331
Tup.196	chrIV	550790	551390	600		0.398948	0.324315	0.328525	0.896182		Intergenic	7				996.976	-0.104096	0.468136		1200.65	0.0717328	0.586863		1038.35	0.0269217	0.99407		1182.46	0.338813	0.0217398			YDR046C	8112.55	-0.26753	-0.364862	-0.0551083	-0.152441		YDR047W	539.732	-0.133131	-0.308214	-0.125609	-0.300692
Tup.197	chrIV	555600	556670	1070		0.678073	0.573602	-0.214597	-0.559632		ORF	8	TPI1			1187.49	-0.951352	1.32362e-06		1126.3	-1.6603	2.03679e-19		1541.76	-0.0220699	0.99407		728.126	-0.59709	0.00223507			TPI1	9837.1	-0.152062	-0.0895328	-0.303904	-0.241374		0	#N/A	#N/A	#N/A	#N/A	#N/A
Tup.198	chrIV	562790	563530	740		1.17124	0.94182	0.452357	0.779396		Intergenic	1				1358.13	-0.668395	0.000187461		1427.76	-0.392936	0.0185491		1551.14	-0.185369	0.99407		1233.8	0.216759	0.16053			YDR054C	8616.84	-0.362504	-0.47431	0.0757717	-0.0360341		YDR055W	3735.2	1.05391	1.89037	-0.0328692	0.803596
Tup.199	chrIV	568780	569130	350		0.932383	0.723289	-0.0484686	-0.228357		tRNA	8	tD(GUC)D	tR(UCU)D		415.444	-0.96619	7.23754e-07		386.363	-1.32353	1.15487e-15		519.25	-0.14158	0.99407		271.022	-0.365906	0.065994			YDR058C	409.013	1.10119	0.850816	0.0947436	-0.155627		tR(UCU)D	#N/A	#N/A	#N/A	#N/A	#N/A
Tup.200	chrIV	579390	580550	1160		0.804916	0.610179	-0.561537	-0.838883		ORF	3	RPS13			1128.79	-1.3093	6.80607e-12		1070.86	-1.88886	4.69713e-25		1552.02	-0.0806782	0.99407		595.835	-0.530662	0.00785591			RPS13	7255.93	-0.259105	-0.160521	-0.251145	-0.152561		0	#N/A	#N/A	#N/A	#N/A	#N/A
Tup.201	chrIV	591570	593590	2020		0.558314	0.54186	1.61967	2.39843		Intergenic	5	SNF11			6828.1	1.45718	4.9217e-14		9452.24	1.92012	1.08063e-40		3574.86	-0.0310983	0.99407		13468.4	0.568829	0.000436047			YDR072C	193.523	0.0798736	1.06152	-0.19235	0.789294		YDR073W	197.58	-0.494802	-1.35514	-0.0673798	-0.927718
Tup.202	chrIV	599520	602300	2780		1.08428	1.0542	0.828558	0.88895		ORF	1	RAD55	SED1		21167.9	-0.192749	0.498722		18466.9	-0.348977	0.222491		20420.1	-0.265249	0.99407		19446.3	-0.295128	0.047291			RAD55	127.333	0.324264	0.260346	-0.208853	-0.272771		SED1	40786.6	1.58022	2.17606	0.338715	0.934554
Tup.203	chrIV	616280	616800	520		0.388658	0.327201	0.314855	1.2176		Intergenic	7				584.056	0.240839	0.128186		868.662	0.800275	4.38842e-07		550.282	0.0906631	0.99407		938.114	0.787497	3.90656e-06			YDR085C	50.6444	1.27303	1.041	-0.0959857	-0.32802		YDR086C	1001.3	0.117807	0.0049366	0.128334	0.0154635
Tup.204	chrIV	621150	621980	830		-0.0102403	0.216138	2.18133	3.06277		Intergenic	6				2648.36	2.80222	1.41401e-50		4529.68	3.2394	5.85688e-67		719.748	0.228809	0.99407		6922.75	0.811355	2.90554e-07			tR(ACG)D	255.418	0.110917	-0.0624786	-0.17037	-0.343766		YDR089W	593.724	0.230783	0.257677	-0.0557425	-0.0288482
Tup.205	chrIV	636060	636550	490		0.892612	0.612688	0.517575	0.968141		Intergenic	1				774.6	-0.168086	0.276662		860.662	-0.0891491	0.538092		803.307	-0.0326438	0.99407		844.938	0.176813	0.27729			YDR093W	93501.6	-0.203515	-0.158874	-0.17247	-0.127829		YDR096W	667.608	1.08223	0.974522	0.051377	-0.0563315
Tup.206	chrIV	667920	668180	260		0.627565	0.505954	-0.436185	-0.201477		tRNA	8	tI(AAU)D			229.125	-1.08229	1.61218e-08		237.428	-1.04428	5.35828e-10		297.355	-0.110105	0.99407		163.254	0.0624269	0.798341			YDR106W	156.083	-0.0366343	0.106033	0.0478573	0.190524		tI(AAU)D	#N/A	#N/A	#N/A	#N/A	#N/A
Tup.207	chrIV	680090	680500	410		-0.100856	-0.200754	0.928257	1.4012		Intergenic	5				680.737	1.76418	5.42233e-14		813.26	1.75326	2.25405e-14		322.089	0.102929	0.99407		1246.52	0.240072	0.172935			YDR111C	3833.52	-0.264967	-0.466535	0.0483545	-0.153213		YDR113C	162.297	-0.0168418	-0.0973688	0.0388605	-0.0416665
Tup.208	chrIV	690400	690920	520		0.463315	0.475324	1.51645	1.82168		Intergenic	5	VBA4			1272.18	1.56816	7.15506e-31		1329.42	1.40064	5.87584e-26		645.551	0.0341716	0.99407		2072.2	0.00148781	0.99284			YDR119W	30940	-0.0390698	-0.0131837	-0.258752	-0.232866		YDR119W-A	135.888	3.10155	2.97055	0.095519	-0.0354838
Tup.209	chrIV	700030	700300	270		-0.348189	-0.388841	-0.613819	0.674207		ORF	7	YDR124W			166.564	-0.210709	0.503066		258.159	0.63697	0.0633278		180.341	0.0130087	0.99407		253.292	1.01501	0.000102119			YDR124W	69.5627	0.0491717	2.93358	-0.194015	2.69039		0	#N/A	#N/A	#N/A	#N/A	#N/A
Tup.210	chrIV	721040	723110	2070		2.44926	2.26217	2.81941	2.88068		Intergenic	2				25236.7	0.692894	0.0186384		22686.9	0.479623	0.109623		18013	-0.163476	0.99407		31103.1	-0.249085	0.127666			YDR132C	763.118	0.808045	0.563772	-0.0203068	-0.26458		YDR135C	4541.74	-0.246949	-0.0861421	-0.071962	0.0888447
Tup.211	chrIV	746070	746430	360		0.479728	0.490053	0.0757556	0.0837889		Intergenic	8	MKC7			395.472	-0.311823	0.0733114		370.135	-0.681345	1.55638e-05		422.103	-0.0955806	0.99407		344.188	-0.33118	0.0856816			YDR144C	19546.5	-0.344858	0.0435233	-0.00417515	0.384206		YDR145W	506.903	0.0157523	-0.250487	0.169652	-0.0965874
Tup.212	chrIV	768510	768790	280		0.267043	0.317325	-0.765196	-0.870518		ORF	3	CPR1			195.075	-0.958618	5.11611e-08		201.056	-1.52625	2.4722e-09		261.701	0.0559693	0.99407		127.311	-0.379999	0.16053			CPR1	11141.4	0.45786	0.814406	-0.103588	0.252958		0	#N/A	#N/A	#N/A	#N/A	#N/A
Tup.213	chrIV	795640	796050	410		-0.259996	-0.197065	0.434593	1.50404		Intergenic	7				386.739	0.868823	0.000259987		672.863	1.57714	2.89292e-09		288.554	0.141131	0.99407		813.479	0.996637	1.52887e-09			YDR169C-A	2194.03	0.148129	0.0579802	0.0193323	-0.0708164		YDR170C	3959.21	-0.241196	-0.397267	0.0021972	-0.153874
Tup.214	chrIV	835590	836260	670		0.790102	0.746652	0.900774	1.40007		Intergenic	1				1035.94	0.253488	0.08626		1329.33	0.451405	0.000196443		971.93	0.0997339	0.99407		1439.29	0.428731	0.0101686			YDR186C	1367.48	-0.481084	-0.631433	-0.0613818	-0.211731		YDR188W	1867.47	-0.191338	-0.379659	-0.202884	-0.391205
Tup.215	chrIV	870580	871060	480		0.409291	0.572223	1.61203	2.02884		Intergenic	5				1203.9	1.50293	6.50253e-23		1422.49	1.39018	3.97298e-21		663.669	0.171804	0.99407		2078.33	0.193912	0.298584			YDR208W	4920.22	0.456045	0.93654	-0.0113864	0.469108		YDR210W	374.996	0.246733	0.343506	0.0441673	0.14094
Tup.216	chrIV	875940	876350	410		0.935779	0.363101	0.709336	-0.606639		Intergenic	8				879.932	-0.0609458	0.820333		446.587	-1.37499	5.43996e-18		734.688	-0.63191	0.118216		600.223	-1.80973	8.61563e-29			YDR210W	1366.55	-0.333255	-0.963483	-0.0626613	-0.692889		tI(UAU)D	3.65314	0.284692	-0.0217	-0.250698	-0.557089
Tup.217	chrIV	884290	884640	350		0.686383	0.578694	-0.0736171	-0.980831		tRNA	3	tI(UAU)D			422.018	-0.730315	9.36409e-05		347.52	-1.73998	2.04091e-14		500.155	-0.124481	0.99407		257.795	-1.0072	3.35953e-06			tI(UAU)D	371.207	-0.197455	-0.0261975	-0.00971182	0.161546		YDR211W	1114.65	-0.309696	-0.244614	-0.0465732	0.0185083
Tup.218	chrIV	888900	889570	670		0.420489	0.542684	2.29674	2.80264		Intergenic	6				3043.84	2.59431	2.27075e-72		3706.4	2.60013	1.23956e-104		899.733	0.127424	0.99407		6257.45	0.269947	0.0814292			YDR212W	6002.26	-0.318057	-0.43573	-0.0848524	-0.202526		YDR213W	375.41	0.581822	0.481642	-0.0345194	-0.134699
Tup.219	chrIV	893810	894540	730		1.42153	1.26837	2.61272	2.83935		Intergenic	6	AHA1			5375.53	1.87464	2.35546e-19		5327.79	1.72945	5.11897e-15		2245.88	-0.043851	0.99407		8988.86	-0.0591911	0.729375			YDR214W	255.832	0.628535	0.282512	-0.0834121	-0.429435		YDR216W	1566.94	2.44889	2.6859	-0.133674	0.103337
Tup.220	chrIV	909460	909810	350		0.484009	0.525286	0.180437	0.87214		Intergenic	1	GTB1			469.819	-0.292592	0.052927		622.762	0.0423672	0.770171		531.818	0.0967125	0.99407		568.786	0.564904	0.000473146			YDR221W	4660.48	-0.18753	-0.535371	0.12446	-0.223381		YDR222W	157.958	-0.0460009	-0.851459	0.0400092	-0.765449
Tup.221	chrIV	915480	915940	460		0.37494	0.218079	-0.691898	-1.08556		ORF	3	HTA1			402.881	-0.999828	1.49371e-07		364.373	-1.84847	1.63991e-10		521.772	-0.0670019	0.99407		230.311	-0.789737	0.00428793			HTA1	1623.47	-0.168363	-0.678861	-0.24999	-0.760488		0	#N/A	#N/A	#N/A	#N/A	#N/A
Tup.222	chrIV	946180	946530	350		0.561234	0.556091	-0.246894	-0.131023		tRNA	8	SUP2			341.412	-0.878431	1.37653e-07		353.666	-0.922963	1.00373e-09		426.526	-0.0824533	0.99407		262.048	0.00615642	0.978463			YDR240C	6372.57	-0.0699258	-0.0740462	-0.00497151	-0.00909184		tY(GUA)D	#N/A	#N/A	#N/A	#N/A	#N/A
Tup.223	chrIV	954940	955690	750		0.189372	0.231099	1.9384	2.17062		Intergenic	5	TRS23	YDR246W-A		2159.76	2.41867	1.24689e-43		2364.44	2.2761	5.12661e-53		701.83	0.0949958	0.99407		4087.66	0.0905685	0.607955			YDR246W-A	#N/A	#N/A	#N/A	#N/A	#N/A		YDR247W	338.333	0.84821	1.07661	0.0260932	0.254491
Tup.224	chrIV	974190	974700	510		0.435342	0.589353	1.32506	1.11821		Intergenic	1	HSP78			859.516	1.02109	3.47437e-10		825.813	0.536277	0.00112391		584.135	0.0958417	0.99407		1151.76	-0.248743	0.169242			YDR258C	300.23	0.359254	0.200544	0.0633197	-0.0953902		YDR259C	211.98	2.0622	2.05509	0.140654	0.13354
Tup.225	chrIV	975780	977000	1220		3.08823	3.03529	3.10868	2.95461		Intergenic	2	SWM1			24429.9	-0.130344	0.672008		21566.1	-0.579696	0.0442657		24179.4	-0.120866	0.99407		21930.5	-0.444296	0.00379648			YDR259C	70.0548	0.686524	0.814515	-0.105871	0.0221206		YDR260C	222.15	0.570857	0.396834	0.247396	0.0733731
Tup.226	chrIV	980860	981220	360		0.608664	0.440447	-0.349508	-0.292219		tRNA	8	tS(AGA)D2			351.6	-0.904846	3.06692e-07		354	-1.02184	3.56002e-09		439.505	-0.0978347	0.99407		258.139	-0.0829865	0.704923			YDR261C	2063.52	0.0231638	-0.152506	0.0174122	-0.158258		tS(AGA)D	#N/A	#N/A	#N/A	#N/A	#N/A
Tup.227	chrIV	985290	985690	400		0.862207	0.277694	0.658716	-0.707088		Intergenic	8				828.341	-0.0495259	0.860387		434.721	-1.32062	3.62946e-13		695.835	-0.592029	0.243539		574.309	-1.7297	1.19565e-22			tS(AGA)D	3698.73	0.363954	0.337335	-0.00357606	-0.0301958	2 peaks, 1 IG	tG(GCC)D	#N/A	#N/A	#N/A	#N/A	#N/A
Tup.228	chrIV	991940	992420	480		0.339385	0.293467	0.0814477	0.587838		Intergenic	7				621.524	-0.343123	0.0291206		738.105	0.00469299	0.979019		675.667	-0.0711643	0.99407		694.691	0.412952	0.0176008			tS(AGA)D	756.476	0.43318	0.349899	0.0365675	-0.0467139	2 peaks, 1 IG	tG(GCC)D	#N/A	#N/A	#N/A	#N/A	#N/A
Tup.229	chrIV	992600	993020	420		0.441839	0.258633	-0.513501	-0.293663		tRNA	3				399.645	-1.00165	3.4011e-08		413.743	-0.976315	8.51734e-10		509.952	-0.111891	0.99407		293.665	0.0509043	0.817496			tG(GCC)D	5146.16	-0.322293	-0.515347	-0.0400419	-0.233097		YDR262W	386.443	0.117451	0.187527	-0.0356581	0.0344177
Tup.230	chrIV	1011660	1012020	360		0.115903	-0.0674889	0.339978	0.983483		ORF	7	BSC2			437.155	0.210342	0.225118		548.992	0.454382	0.0622277		409.536	0.0334722	0.99407		595.728	0.425619	0.0213711			BSC2	221.707	0.304502	0.0652988	0.147568	-0.0916354		0	#N/A	#N/A	#N/A	#N/A	#N/A
Tup.231	chrIV	1015950	1016440	490		-0.0688603	-0.02162	0.5217	1.01063		Intergenic	7				671.893	0.883402	3.87376e-05		799.967	0.906736	9.83201e-05		485.169	0.0767047	0.99407		1033.13	0.243792	0.106514			YDR277C	94.1129	1.98379	1.60064	0.722649	0.339499	2 peaks, 1 IG	tE(CUC)D	#N/A	#N/A	#N/A	#N/A	#N/A
Tup.232	chrIV	1017080	1017420	340		0.702406	0.615394	0.163071	-0.196562		tRNA	8	tE(CUC)D			414.817	-0.461106	0.0110774		373.282	-1.1101	3.32986e-13		466.545	-0.0626531	0.99407		316.224	-0.576496	0.00224603			YDR277C	766.521	-0.503502	-0.318589	-0.068626	0.116287	2 peaks, 1 IG	tE(CUC)D	#N/A	#N/A	#N/A	#N/A	#N/A
Tup.233	chrIV	1049500	1049870	370		-0.358916	-0.157649	-0.281676	0.412022		ORF	7	SSD1			272.624	0.213363	0.460151		362.381	0.336492	0.258129		269.931	0.17929	0.99407		376.02	0.446538	0.0343777			SSD1	3330.29	0.346705	0.338459	-0.00365196	-0.0118987		0	#N/A	#N/A	#N/A	#N/A	#N/A
Tup.234	chrIV	1055850	1057210	1360		0.333924	0.173573	2.3731	3.38745		Intergenic	6	SUR2			4922.65	2.21922	3.93087e-49		8493.49	2.99934	7.68331e-102		1710.15	-0.03499	0.99407		12525.6	0.886035	6.89217e-09			YDR296W	45.9819	2.82828	2.26507	-0.0861846	-0.649394		YDR297W	1532.46	0.537666	0.00828468	-0.0885751	-0.617956
Tup.235	chrIV	1075390	1075640	250		0.65708	0.566988	-0.46644	-0.442272		tRNA	3	tV(CAC)D			251.155	-1.16915	3.17401e-08		244.443	-1.45205	2.70545e-12		332.245	-0.105991	0.99407		154.092	-0.256609	0.31498			YDR306C	1653.28	-0.0630404	-0.17007	-0.0335558	-0.140585		tV(CAC)D	#N/A	#N/A	#N/A	#N/A	#N/A
Tup.236	chrIV	1080280	1081070	790		2.41358	2.23296	2.1944	2.55898		Intergenic	2				5849.85	-0.0634353	0.8227		5954.86	-0.00796209	0.979019		5629.34	-0.140961	0.99407		6304.77	0.0383678	0.820794			YDR309C	22083.1	0.129913	-0.0490501	-0.229031	-0.407995		YDR310C	1082.04	-0.13274	-0.591299	0.0920716	-0.366487
Tup.237	chrIV	1086840	1087430	590		0.866317	2.28431	0.539577	1.74709		Intergenic	1	TFB1			1005.3	-0.155976	0.365126		2889.99	-0.597793	0.0372936		2085.4	1.57186	1.96795e-07		1753.74	1.26006	1.27589e-19			YDR311W	1306.02	0.22664	0.0491386	0.12641	-0.0510908		YDR312W	316.269	-0.135848	-0.102104	-0.0648376	-0.0310939
Tup.238	chrIV	1150710	1151040	330		0.864661	0.659924	-0.195685	-0.353006		tRNA	8	tX(XXX)D			401.006	-0.921946	1.36696e-05		376.475	-1.52768	1.79477e-25		510.099	-0.0571268	0.99407		254.307	-0.525187	0.011777			YDR339C	146.469	0.242335	0.0726314	0.0688021	-0.100902		tX(XXX)D	#N/A	#N/A	#N/A	#N/A	#N/A
Tup.239	chrIV	1155770	1158000	2230		0.576922	0.561598	1.91246	2.03885		Intergenic	5				9670.89	1.58694	3.54731e-08		9296.91	1.3707	1.93613e-15		4714.86	-0.0439203	0.99407		15040.5	-0.120093	0.621504			YDR342C	223.77	0.0969312	-0.00528944	-0.0459745	-0.148195		YDR343C	134.993	2.91548	2.28732	0.165606	-0.462551
Tup.240	chrIV	1161370	1162840	1470		1.65857	1.56809	2.48844	2.9705		Intergenic	2				11850.6	0.860804	0.00183856		13234.8	0.98048	0.000207545		8146.43	-0.0582205	0.99407		17727.4	0.190191	0.283919			YDR343C	24615.8	-0.060338	0.166136	-0.257847	-0.0313735		YDR345C	9256.84	0.759368	1.14663	-0.177699	0.20956
Tup.241	chrIV	1164370	1166900	2530		0.557947	0.416867	1.48214	1.92597		Intergenic	5				9781.24	1.85992	1.46557e-26		10927.6	1.96073	1.92795e-70		4097.85	-0.070262	0.99407		17673.2	0.168314	0.331173			YDR345C	24615.8	-0.060338	0.166136	-0.257847	-0.0313735		YDR346C	1892.22	-0.123935	-0.516083	0.0662683	-0.32588
Tup.242	chrIV	1175710	1175990	280		0.798739	0.750196	-0.209336	-0.124236		tRNA	8	EMT1			308.306	-0.987756	1.45127e-05		314.682	-1.22251	3.88229e-10		400.171	-0.0433911	0.99407		213.433	-0.14574	0.52513			YDR349C	2002.9	-0.353702	-0.503565	-0.01396	-0.163823		tM(CAU)D	#N/A	#N/A	#N/A	#N/A	#N/A
Tup.243	chrIV	1178180	1178910	730		-0.494376	-0.339115	-0.857846	1.85319		Intergenic	7	SBE2			407.943	-0.381101	0.214586		1442.12	1.99114	2.22384e-09		490.398	0.164171	0.99407		1435.14	2.69172	2.87859e-43			YDR350C	123.619	0.382291	0.0915316	-0.0812824	-0.372042		YDR351W	731.879	0.0743599	-0.0834659	0.0181925	-0.139633
Tup.244	chrIV	1184340	1184690	350		0.34408	0.217683	0.402063	1.2554		Intergenic	7	TRR1			424.74	0.299874	0.12468		566.584	0.702018	3.53123e-07		382.743	0.0284527	0.99407		631.953	0.563316	0.0035145			YDR353W	32.7862	0.936439	-0.0263319	1.39636	0.433592		YDR354W	1097.32	0.245443	0.864978	-0.111466	0.50807
Tup.245	chrIV	1201640	1201950	310		0.847942	0.606765	-0.143332	-0.452119		tRNA	8	tK(CUU)D1			343.537	-0.872394	2.92617e-07		309.49	-1.31363	6.56641e-15		417.728	-0.156248	0.99407		227.268	-0.467173	0.0258003			YDR363W	2741.03	0.00977785	-0.31268	0.0126372	-0.309821		tK(CUU)D	#N/A	#N/A	#N/A	#N/A	#N/A
Tup.246	chrIV	1206920	1207410	490		0.423631	0.12693	0.186366	0.491001		Intergenic	7				561.369	-0.269947	0.0605075		651.816	0.0864646	0.522663		588.415	-0.109093	0.99407		636.606	0.382124	0.0176326			YDR365C	16739.2	0.0559628	0.0782395	-0.100791	-0.0785144		YDR366C	#N/A	#N/A	#N/A	#N/A	#N/A
Tup.247	chrIV	1236550	1238020	1470		0.475926	0.376186	-0.617365	-0.729591		ORF	3	YRA1			1131.26	-1.01194	6.6208e-12		1083.74	-1.50635	7.15157e-12		1468.6	-0.0693644	0.99407		708.801	-0.433975	0.030887			YRA1	1350.78	-0.0804945	-0.398396	0.0705302	-0.247371		0	#N/A	#N/A	#N/A	#N/A	#N/A
Tup.248	chrIV	1239430	1239920	490		0.588039	0.512615	-0.670854	-0.922823		ORF	3	RPP2B			423.517	-1.19313	7.75319e-09		430.378	-1.9159	1.81289e-26		596.782	0.0562609	0.99407		236.458	-0.53248	0.0245913			RPP2B	5439.02	-0.315648	-0.14419	-0.419287	-0.247828		0	#N/A	#N/A	#N/A	#N/A	#N/A
Tup.249	chrIV	1242240	1242630	390		0.331251	0.247233	0.410656	0.814892		Intergenic	7				508.656	0.287527	0.141923		581.089	0.156564	0.415845		474.336	0.107074	0.99407		633.246	0.11006	0.577731			YDR384C	#N/A	#N/A	#N/A	#N/A	#N/A		YDR385W	10084	-0.259518	-0.00739056	-0.311188	-0.0590607
Tup.250	chrIV	1243190	1244500	1310		0.558897	0.392947	-0.694394	-0.897766		ORF	3	EFT2			1001.3	-1.20772	3.74797e-11		1004.38	-1.71105	1.01689e-12		1381.38	-0.0141449	0.99407		579.56	-0.389234	0.0854778			EFT2	10084	-0.259518	-0.00739056	-0.311188	-0.0590607		0	#N/A	#N/A	#N/A	#N/A	#N/A
Tup.251	chrIV	1251750	1252140	390		0.00568974	-0.173972	-0.583936	0.559821		Intergenic	7	SAC7			289.971	-0.334193	0.26326		419.999	0.201923	0.388184		336.425	0.114966	0.99407		381.05	0.788561	0.00103706			YDR388W	577.779	0.0163746	-0.269373	0.0811986	-0.204549		YDR389W	1093.11	0.0609294	-0.0437383	0.0751153	-0.0295525
Tup.252	chrIV	1256890	1257190	300		0.751743	0.57403	-0.275227	-0.448523		tRNA	8	SUF3			291.267	-0.979839	1.68965e-08		266.967	-1.3865	1.63981e-13		364.254	-0.148844	0.99407		185.979	-0.426832	0.0579715			YDR390C	224.259	-0.245136	-0.325289	0.116503	0.0363499		tG(CCC)D	#N/A	#N/A	#N/A	#N/A	#N/A
Tup.253	chrIV	1273800	1274360	560		0.664458	0.534117	1.12809	2.01566		Intergenic	5				1010.17	0.862714	2.52103e-09		1565.68	1.53628	2.1067e-33		715.018	0.0143661	0.99407		1959.66	0.823678	4.5357e-09			YDR402C	57.7883	0.242594	1.66169	0.174501	1.59359		YDR403W	170.874	3.45351	3.41433	-0.0938358	-0.133015
Tup.254	chrIV	1277970	1279590	1620		0.588171	0.624539	1.6461	1.86777		Intergenic	5	MRP20	PDR15		6430.29	1.64718	1.06697e-18		6456.79	1.57471	7.0713e-22		2993.85	-0.0849282	0.99407		10495.8	-0.0254311	0.881465			YDR405W	3962.31	-0.390746	-0.376327	-0.11561	-0.101191		YDR406W	1246.6	2.08495	1.81554	-0.139254	-0.408658
Tup.255	chrIV	1301800	1302050	250		0.431472	0.394336	-0.813108	-1.15412		ORF	3	RPL12B			192.694	-1.35992	1.09092e-11		194.708	-1.92683	2.35147e-12		275.172	-0.00305258	0.995106		102.1	-0.441584	0.138127			RPL12B	6130.28	-0.249064	-0.41024	-0.0775428	-0.238718		0	#N/A	#N/A	#N/A	#N/A	#N/A
Tup.256	chrIV	1305540	1305860	320		0.559497	0.43515	-0.287094	0.0663937		tRNA	8	tS(AGA)D3			340.122	-0.736862	8.01232e-06		367.028	-0.721444	1.60677e-05		415.623	-0.0520048	0.99407		287.017	0.100457	0.628837			YDR419W	53579.1	0.105656	0.232857	-0.318247	-0.191046		tS(AGA)D	#N/A	#N/A	#N/A	#N/A	#N/A
Tup.257	chrIV	1334020	1334550	530		-0.476045	-0.352374	0.0299874	1.22889		Intergenic	7				349.718	0.513031	0.114207		644.243	1.25784	0.000607023		314.542	0.232122	0.99407		713.038	1.12731	2.50737e-07			YDR435C	904.014	0.189685	0.374482	0.113157	0.297954		YDR436W	327.034	0.15357	0.452044	-0.113092	0.185382
Tup.258	chrIV	1345080	1346080	1000		2.50345	2.36988	2.71697	2.80404		ORF	2	SSN2			13545.4	0.692388	0.0209328		13639.7	0.573558	0.0565181		10023.3	-0.0555301	0.99407		17835.2	-0.0472834	0.802985			SSN2	792.435	0.0249394	0.385523	-0.0844092	0.276175		0	#N/A	#N/A	#N/A	#N/A	#N/A
Tup.259	chrIV	1352370	1352670	300		0.81371	0.629213	-0.232223	-0.17084		tRNA	8	tK(CUU)D2			360.101	-0.900287	3.69553e-06		347.285	-1.2362	6.76462e-12		450.481	-0.0909281	0.99407		247.169	-0.294246	0.169363			YDR444W	5135.56	-0.0835249	-0.121145	-0.158534	-0.196154		tK(CUU)D	#N/A	#N/A	#N/A	#N/A	#N/A
Tup.260	chrIV	1362200	1362720	520		1.66881	1.59286	1.25783	1.77683		Intergenic	4				1825.85	-0.368341	0.125633		2093.14	0.058966	0.836233		1935.59	-0.146417	0.99407		2015.31	0.407474	0.00872128			YDR451C	#N/A	#N/A	#N/A	#N/A	#N/A		YDR452W	1129	0.274297	0.182408	0.00857309	-0.0833161
Tup.261	chrIV	1402750	1403320	570		0.760793	0.64291	-0.79208	-0.728655		snRNA	3	SNR13			568.651	-1.46064	5.07488e-14		582.213	-1.79341	6.71464e-23		818.212	-0.0333993	0.99407		304.506	-0.23732	0.298177			YDR471W	51.7807	0.378642	0.547416	-0.0801883	0.0885854		snR13	170.264	-0.253411	0.0511364	-0.00408104	0.300467
Tup.262	chrIV	1410130	1410970	840		-0.22927	-0.265792	0.828856	2.52893		ORF	5	YDR476C			951.01	1.29831	2.45688e-05		2531.13	2.73053	1.48667e-28		572.05	0.107623	0.99407		3105.44	1.67916	7.73614e-17			YDR476C	381.519	-0.0725332	0.107297	-0.204555	-0.0247247		0	#N/A	#N/A	#N/A	#N/A	#N/A
Tup.263	chrIV	1417080	1417370	290		-0.451148	-0.384828	-0.623059	0.989138		Intergenic	7				168.897	-0.190435	0.559846		352.285	1.01845	0.0113518		194.626	0.204073	0.99407		339.326	1.57291	5.0038e-14			YDR479C	169.455	1.04018	0.85714	0.148784	-0.0342567		YDR480W	123.476	0.021465	0.799662	0.0462414	0.824439
Tup.264	chrIV	1419680	1420350	670		0.750425	0.763915	0.577022	1.21129		ORF	1	PHO8			894.134	-0.0830585	0.598566		1147.61	0.212494	0.131169		931.824	0.0617389	0.99407		1134.12	0.489819	0.000916296			PHO8	1406.96	-0.277593	-0.109659	-0.162137	0.00579762		0	#N/A	#N/A	#N/A	#N/A	#N/A
Tup.265	chrIV	1429220	1429640	420		0.292042	0.374374	-0.527	0.0276633		ORF	8	PAC11			337.505	-0.770506	2.68819e-06		423.424	-0.736638	1.68559e-05		448.632	0.16024	0.99407		305.674	0.32842	0.0965012			PAC11	190.878	0.0501694	-0.225596	-0.269898	-0.545664		0	#N/A	#N/A	#N/A	#N/A	#N/A
Tup.266	chrIV	1433450	1433870	420		-0.37127	-0.363931	0.732147	1.22381		ORF	7	PKH1			428.419	1.33121	3.12877e-05		544.168	1.5111	1.60498e-06		248.752	0.0502486	0.99407		767.347	0.365967	0.146817			PKH1	348.941	0.192842	0.370887	-0.136958	0.0410875		0	#N/A	#N/A	#N/A	#N/A	#N/A
Tup.267	chrIV	1434390	1434870	480		1.01753	0.815522	0.568851	0.87515		Intergenic	1	IZH1			825.965	-0.133833	0.512186		902.152	-0.202547	0.273224		860.14	0.014081	0.99407		879.891	0.068661	0.739062			YDR490C	4127	-0.41043	-0.457057	-0.270401	-0.317027		YDR492W	937.776	0.57624	0.732877	-0.0067673	0.149869
Tup.268	chrIV	1450990	1451260	270		0.184696	0.339511	-0.723567	-0.276533		Intergenic	3				223.807	-0.839743	0.000266217		276.571	-0.930984	2.9235e-07		305.369	0.184097	0.99407		189.094	0.227278	0.372476			YDR500C	7258.37	-0.0880368	0.174642	-0.292533	-0.0298546		YDR501W	119.821	0.556662	0.413017	0.138406	-0.00523844
Tup.269	chrIV	1459510	1460290	780		-0.0972642	-0.0841977	1.17275	2.11228		ORF	5	YDR506C			1226.18	1.46879	9.72214e-13		2155.32	2.13502	2.1121e-22		683.116	0.136778	0.99407		2869.16	0.947576	3.32746e-09			YDR506C	101.631	0.499613	0.159947	-0.0244863	-0.364152		0	#N/A	#N/A	#N/A	#N/A	#N/A
Tup.270	chrIV	1461600	1461940	340		0.754965	0.488874	-0.113356	0.130785		tRNA	8	tL(CAA)D			363.385	-0.727053	9.40972e-05		359.599	-0.81875	2.03706e-08		429.45	-0.129126	0.99407		288.822	-0.0903336	0.650429			YDR506C	82.5735	3.55374	3.8632	0.468368	0.77783	2 peaks, 1 IG	tL(CAA)D	#N/A	#N/A	#N/A	#N/A	#N/A
Tup.271	chrIV	1468610	1469270	660		1.14549	1.1118	1.14429	1.85102		Intergenic	4				1864.4	0.142398	0.486778		2348.91	0.461873	0.0105927		1762.3	0.0111156	0.99407		2529.05	0.459629	0.00439381			YDR508C	324.425	0.234695	-0.0890827	0.270756	-0.053022	2 peaks, 1 IG	YDR510W	633.545	0.172803	-0.305271	0.410396	-0.0676779
Tup.272	chrIV	1476690	1477030	340		-0.0855118	-0.184	0.483076	0.917374		Intergenic	7				385.602	0.958465	0.00050893		457.335	0.883045	0.00339032		275.439	0.129418	0.99407		596.209	0.20091	0.354501			YDR516C	999.82	-0.569398	-0.570969	-0.117949	-0.11952		YDR517W	894.329	0.605638	0.503617	-0.216062	-0.318082
Tup.273	chrIV	1489090	1490550	1460		1.69605	1.41256	0.618821	0.778414		Intergenic	1	YDR524C-B			4719.28	-0.751529	0.00108416		4753.08	-0.633984	0.00672367		5519.24	-0.176714	0.99407		3909.01	0.0686	0.642208			YDR524C-B	22.6799	1.25562	1.93469	-0.0713936	0.607682		YDR525W-A	225.006	0.364088	1.08144	-0.596251	0.121104
Tup.274	chrIV	1493840	1494320	480		0.465594	0.407412	0.752362	1.92696		Intergenic	5				737.38	0.551026	0.000312721		1336.38	1.60615	8.22312e-24		593.228	-0.00543016	0.99407		1561.22	1.18354	6.98433e-12			snR84	82.8371	0.185114	1.01368	-0.15756	0.67101		YDR528W	371.695	0.391157	-0.183599	0.197203	-0.377553
Tup.275	chrIV	1502240	1502810	570		-0.0824804	-0.0174609	1.19524	1.79167		Intergenic	5	HSP31			929.013	1.69406	1.38299e-16		1234.19	1.86701	6.03633e-18		457.282	0.116422	0.99407		1812.32	0.433254	0.00800117			YDR533C	441.274	-0.260171	0.98228	-0.0737804	1.16867		YDR534C	125.143	1.35604	1.73657	-0.299012	0.0815185
Tup.276	chrIV	1506910	1507820	910		1.879	1.7917	3.16499	3.44589		Intergenic	2				8081.4	1.83915	3.35613e-13		8398.99	1.79008	5.78701e-12		3431.92	-0.0458113	0.99407		13857.2	0.0328633	0.84159			YDR534C	4708.45	-0.210865	-0.441261	0.174769	-0.0556265		YDR536W	31.5406	4.47117	4.44751	0.19883	0.175165
Tup.277	chrIV	1517720	1518350	630		-0.275817	-0.272189	1.14014	2.86456		Intergenic	5				973.927	1.91549	5.00675e-19		2862.12	3.3552	2.49566e-26		432.191	0.157832	0.99407		3652.16	1.75	3.50036e-20			YDR540C	698.239	0.0500761	-0.287122	0.0133394	-0.323859	2 peaks, 1 IG	YDR541C	311.543	0.0431976	0.677122	-0.047624	0.5863
Tup.278	chrIV	1518780	1519170	390		-0.707649	-0.547164	-0.0279897	1.46805		Intergenic	7				263.309	0.823179	0.00820923		596.908	2.01021	1.80212e-08		201.975	0.153777	0.99407		697.366	1.4967	6.61633e-17			YDR540C	5430.72	-0.193129	-0.429437	0.172324	-0.0639847	2 peaks, 1 IG	YDR541C	311.543	0.0431976	0.677122	-0.047624	0.5863
Tup.279	chrIV	1520870	1521190	320		-0.306353	-0.246147	-0.250125	1.25374		Intergenic	7				242.887	0.402083	0.0879849		430.675	1.16555	8.9798e-05		223.718	0.182883	0.99407		470.49	1.09705	3.60549e-09			YDR541C	48.6888	0.404026	-0.256097	-0.342001	-1.00212	2 peaks, 1 IG	YDR542W	#N/A	#N/A	#N/A	#N/A	#N/A
Tup.280	chrIV	1522470	1523170	700		-0.293273	-0.324861	0.455083	2.05411		Intergenic	5				634.372	0.979918	1.90382e-06		1603.23	2.41146	1.30286e-19		440.462	0.08879	0.99407		1910.19	1.66698	1.41438e-26			YDR541C	11.0195	0.418213	0.742757	-0.431855	-0.107311	2 peaks, 1 IG	YDR542W	#N/A	#N/A	#N/A	#N/A	#N/A
Tup.281	chrIX	9270	9920	650		0.121773	0.15397	1.38336	2.18417		Intergenic	5				1351.24	1.53267	2.05505e-12		2099.28	2.07408	2.40035e-34		706.537	0.0623763	0.99407		2922.21	0.737212	0.000148464			YIL176C	498.648	0.0473768	0.33959	0.149375	0.441589		YIL173W	12.0974	-0.396118	0.00282817	-0.211514	0.187432
Tup.282	chrIX	18550	19450	900		2.6141	2.5616	3.9559	3.81569		Intergenic	2				20436.4	2.0345	1.20601e-12		19014	1.75429	6.49502e-10		7856.06	-0.0216515	0.99407		33556.5	-0.174142	0.303596			YIL172C	2996.17	1.89819	2.29383	-0.293511	0.102126	2 peaks, 1 IG	YIL169C	61.7059	0.673798	3.84853	0.291958	3.46669
Tup.283	chrIX	21470	23000	1530		2.77303	2.50303	2.68847	2.72396		Intergenic	2				18102.4	0.287599	0.347752		16174.2	0.0838432	0.786733		15086.1	-0.192242	0.99407		19725.3	-0.270151	0.0964902			YIL172C	3509.85	-0.182271	0.00257503	-0.18877	-0.00392379	2 peaks, 1 IG	YIL169C	61.7059	0.673798	3.84853	0.291958	3.46669
Tup.284	chrIX	23550	23870	320		0.453291	0.346953	-0.467041	-0.501256		ORF	3	HPF1'			243.191	-0.869375	1.34218e-07		238.833	-1.19703	5.21906e-12		304.62	-0.0729573	0.99407		171.438	-0.268707	0.239579			HPF1'	#N/A	#N/A	#N/A	#N/A	#N/A		0	#N/A	#N/A	#N/A	#N/A	#N/A
Tup.285	chrIX	26660	27110	450		-0.00933744	0.0305778	0.424362	1.31272		Intergenic	7				434.16	0.538668	0.000689156		655.492	1.1428	7.43062e-11		359.851	0.0521239	0.99407		764.688	0.799516	2.1397e-06			YIL169C	1565	-0.126401	-0.171414	0.151308	0.106295		YIL166C	89.7872	0.544843	0.753	0.127029	0.335186
Tup.286	chrIX	33000	33360	360		0.0132222	-0.174161	0.941339	1.10912		Intergenic	7				431.124	1.13351	3.87833e-07		425.772	0.856107	1.66549e-06		270.437	0.0132587	0.99407		616.411	-0.132592	0.480884			YIL166C	176.141	0.779172	1.16772	-0.11212	0.276432		YIL165C	28.1694	-0.19253	0.472901	-0.320269	0.345162
Tup.287	chrIX	35890	37290	1400		-0.189197	-0.191605	2.71753	3.34182		Intergenic	6				6956.67	3.64589	2.38085e-61		8860.66	3.75446	1.84898e-54		1061.53	0.0863553	0.99407		15871.7	0.343833	0.030145			YIL164C	300.745	-0.025584	-0.563496	-0.154086	-0.691997		YIL162W	1941.59	2.10834	2.29749	-0.231695	-0.0425404
Tup.288	chrIX	41440	41810	370		0.87137	0.864659	-0.240981	0.0902		ORF	8	POT1			411.01	-1.02204	4.99791e-10		482.651	-1.11474	2.43856e-14		568.653	0.113983	0.99407		311.472	0.148576	0.478092			POT1	58.2297	3.50555	5.5072	-0.347224	1.65443		0	#N/A	#N/A	#N/A	#N/A	#N/A
Tup.289	chrIX	53580	54430	850		0.523762	0.539553	0.0284899	1.18634		Intergenic	1				796.247	-0.487286	0.00146266		1264.66	0.296017	0.0220316		969.332	0.140162	0.99407		1111.13	1.05596	4.20615e-11			YIL155C	69.4235	0.0829574	-0.204177	-0.0635521	-0.350686		YIL154C	345.651	-0.307037	-0.308445	0.00959841	0.00819027
Tup.290	chrIX	84850	85160	310		0.0605387	0.266813	-0.564023	0.383165		Intergenic	8	CCT2			252.469	-0.492236	0.0106113		371.383	-0.132501	0.523981		321.011	0.24163	0.99407		303.878	0.737029	0.000133484			YIL142W	7768.92	0.130152	-0.219923	0.197627	-0.152449		YIL140W	2409.8	0.595963	0.959999	0.0234967	0.387533
Tup.291	chrIX	127320	128640	1320		0.434326	0.42652	-0.0858118	0.0365207		ORF	8	SIM1			1436.31	-0.436632	0.000761895		1624.99	-0.444723	0.00033734		1658.14	0.0300459	0.99407		1401.52	0.154834	0.301326			SIM1	3467.65	0.613359	1.14108	0.0371401	0.564857		0	#N/A	#N/A	#N/A	#N/A	#N/A
Tup.292	chrIX	129330	130370	1040		1.61698	1.50026	1.42263	1.50548		Intergenic	4	SIM1			6135.25	0.32259	0.243284		5843.63	0.262801	0.328251		5073.12	-0.176687	0.99407		7127.4	-0.109613	0.507869			YIL123W	738.292	-0.538949	0.226418	-0.0519809	0.713386		YIL122W	159.896	1.25334	0.981367	0.307501	0.0355271
Tup.293	chrIX	133350	134410	1060		-0.188764	-0.230014	2.55017	2.62679		Intergenic	6	QDR2			4061.26	3.28674	3.55651e-50		3613.45	2.93859	2.77763e-36		750.583	-0.0175257	0.99407		7430.36	-0.217382	0.149888			YIL121W	2350.41	-0.363946	-0.546148	0.0269367	-0.155265		YIL120W	162.983	2.43279	2.73874	-0.162446	0.143509
Tup.294	chrIX	134520	134770	250		-0.345072	-0.410012	-0.527836	0.500844		ORF	7	QDR1			148.343	-0.2204	0.461769		217.595	0.383001	0.259822		164.659	0.0805064	0.99407		206.564	0.840838	0.000517712			QDR1	162.983	2.43279	2.73874	-0.162446	0.143509		0	#N/A	#N/A	#N/A	#N/A	#N/A
Tup.295	chrIX	137890	139520	1630		3.3233	3.05854	3.24906	3.22679		Intergenic	2				45017.2	0.248345	0.432183		38648.4	-0.00705991	0.98038		37668.3	-0.224737	0.99407		47192.3	-0.352637	0.0373119			YIL119C	67.4134	0.0140547	0.367349	-0.0204467	0.332848		YIL118W	416.266	-0.0886911	-0.472989	0.181502	-0.202797
Tup.296	chrIX	141590	142830	1240		1.23132	1.19411	1.62232	2.0049		Intergenic	4				4363.24	0.620429	0.00500388		5299.44	0.941711	3.05589e-06		3327.6	-0.0671878	0.99407		6614.12	0.388656	0.019144			YIL117C	277.703	0.381551	1.23504	-0.12488	0.728604		YIL116W	681.359	1.14019	2.06937	0.256115	1.1853
Tup.297	chrIX	150050	150700	650		0.352165	0.397075	1.16432	2.19258		Intergenic	5	SDP1			1153.7	1.17687	1.92922e-16		1867.62	1.86619	5.5891e-35		712.252	0.0304594	0.99407		2446.14	0.858716	8.75418e-09			YIL114C	61.5243	0.104577	-0.258969	0.250288	-0.113258		YIL113W	67.4292	3.17515	2.65377	0.393634	-0.127742
Tup.298	chrIX	154950	155300	350		-0.50566	-0.376126	0.109803	0.731409		Intergenic	7	COX5B			291.986	0.772122	0.00137366		375.961	0.837598	0.0175297		228.797	0.157275	0.99407		458.452	0.367406	0.0467385			YIL112W	653.88	-0.0863923	-0.539036	0.136201	-0.316442		YIL111W	231.417	1.58622	1.36157	0.249905	0.0252545
Tup.299	chrIX	174900	175240	340		0.783171	0.775138	-0.0471735	-0.163459		tRNA	8	tT(AGU)I1			406.447	-0.924146	1.093e-06		392.024	-1.32134	1.61535e-12		514.153	-0.072628	0.99407		272.593	-0.341164	0.100286			YIL102C	19.1436	1.29999	1.50444	0.364324	0.568778		tT(AGU)I	#N/A	#N/A	#N/A	#N/A	#N/A
Tup.300	chrIX	177400	178460	1060		2.30229	2.21282	2.26093	2.5942		Intergenic	2	SGA1			7611.65	-0.0694596	0.821542		8085.16	-0.141561	0.648387		7650.82	-0.0168867	0.99407		8156.55	0.0392013	0.833771			YIL101C	225.539	0.137667	0.192772	-0.270784	-0.215679		YIL099W	478.205	5.91901	5.63107	0.320435	0.0324897
Tup.301	chrIX	187710	187960	250		0.263832	0.339352	-0.60168	-0.610328		Intergenic	3	RSM25			223.253	-0.964862	4.04195e-06		234.034	-1.40697	4.46074e-10		298.529	0.0537168	0.99407		150.905	-0.258413	0.352578			YIL094C	426.539	0.960974	1.69417	-0.170087	0.563105		YIL093C	224.253	-0.0693207	-0.512778	0.0413439	-0.402113
Tup.302	chrIX	240300	241330	1030		0.14475	0.190283	0.619105	1.92006		Intergenic	5	RNR3			1261.86	0.673803	0.000178492		2474.83	1.74222	2.24634e-23		994.097	0.073544	0.99407		2892.51	1.2871	2.59999e-15			YIL066C	4584.68	-0.11709	-0.412961	0.0820076	-0.213864		YIL065C	178.458	0.730035	1.16109	-0.292555	0.138498
Tup.303	chrIX	248600	249750	1150		2.5694	2.37639	2.6936	2.63342		tRNA	2	RGI2			12769	-0.0580232	0.842219		10881	-0.403571	0.18296		11984.6	-0.210401	0.99407		11846	-0.432353	0.00736839			tS(UGA)I	16952.1	-0.116466	0.17289	-0.136556	0.1528		YIL056W	804.095	0.97457	0.984594	0.188915	0.198939
Tup.304	chrIX	254180	254630	450		0.171845	0.236115	0.182515	0.498227		Intergenic	7	YIL055C			549.061	-0.153077	0.35114		647.709	-0.217458	0.205001		599.931	0.111412	0.99407		603.593	0.187957	0.247352			YIL055C	113.496	0.132555	0.0974778	-0.179208	-0.214285		YIL053W	5873.16	-0.029245	-0.327831	0.0316332	-0.266953
Tup.305	chrIX	255080	256170	1090		0.556706	0.390917	-0.583884	-0.9371		ORF	3	RHR2			978.398	-1.08203	4.59245e-09		926.165	-1.78503	2.1257e-13		1302.86	-0.0396493	0.99407		562.431	-0.613376	0.00766497			RHR2	#N/A	#N/A	#N/A	#N/A	#N/A		0	#N/A	#N/A	#N/A	#N/A	#N/A
Tup.306	chrIX	256260	256650	390		0.411531	0.228972	-0.704882	-1.13456		ORF	3	RPL34B			302.542	-1.10646	4.90109e-09		286.11	-1.8216	9.28434e-13		404.929	-0.0414814	0.99407		171.532	-0.628219	0.0182437			RPL34B	2512.83	-0.388214	-0.465132	-0.0258879	-0.102806		0	#N/A	#N/A	#N/A	#N/A	#N/A
Tup.307	chrIX	267890	268510	620		0.991625	0.984596	1.52574	2.44687		ORF	4	YIL046W-A			1763.85	0.993341	1.06657e-08		2995.59	1.76575	1.69922e-24		1193.78	0.0607446	0.99407		3766.79	0.964951	6.47466e-11			YIL046W-A	5.6996	0.439299	0.0111846	0.791634	0.363519		0	#N/A	#N/A	#N/A	#N/A	#N/A
Tup.308	chrIX	270860	271110	250		-0.423576	-0.385228	0.739188	0.365916		ORF	7	PIG2			267.597	1.36464	1.06657e-08		224.117	0.32462	0.374504		164.353	0.241157	0.99407		342.565	-0.652333	0.00049179			PIG2	72.7609	0.180021	0.289456	-0.0648365	0.0445984		0	#N/A	#N/A	#N/A	#N/A	#N/A
Tup.309	chrIX	300110	300430	320		0.604109	0.597347	0.2746	0.351281		tRNA	8	tK(CUU)I			387.892	-0.235566	0.216475		379.247	-0.424644	0.00985131		402.571	-0.0951761	0.99407		367.008	-0.149755	0.460029			YIL030C	3207.76	-0.0459027	-0.0456577	-0.0966586	-0.0964136		tK(CUU)I	#N/A	#N/A	#N/A	#N/A	#N/A
Tup.310	chrIX	301210	301730	520		-0.21122	-0.195444	0.845945	1.8876		Intergenic	5	YIL029C			641.878	1.24895	7.01952e-09		1129.85	2.01312	9.43691e-16		391.315	0.0776446	0.99407		1464.84	0.991048	1.04212e-10			YIL029C	25.5083	0.0999157	0.00533859	0.048612	-0.0459651		YIL027C	149.468	-0.150925	-0.354582	0.104303	-0.0993532
Tup.311	chrIX	314740	315110	370		0.99853	1.00719	0.695778	1.35801		Intergenic	1	HIS6			600.684	-0.0587977	0.72758		764.167	0.263134	0.152893		614.62	0.0341041	0.99407		769.572	0.488798	0.00898438			YIL020C	208.854	-0.0743949	-0.342544	0.186291	-0.0818585		YIL019W	222.431	0.0226936	-0.469002	0.170392	-0.321304
Tup.312	chrIX	316920	317940	1020		0.535637	0.440156	-0.567564	-0.790217		ORF	3	RPL2B			854.641	-1.08986	5.9833e-11		833.7	-1.66098	7.09515e-13		1144.06	-0.0298879	0.99407		510.401	-0.470983	0.0311757			RPL2B	13947.1	-0.202663	-0.00509264	-0.255072	-0.0575014		0	#N/A	#N/A	#N/A	#N/A	#N/A
Tup.313	chrIX	321980	322230	250		-0.080172	0.55746	-0.807756	-0.19018		Intergenic	3				188.194	-0.673368	0.00594584		302.481	-0.966882	1.05731e-08		294.907	0.635973	0.316041		188.81	0.485303	0.0383877			YIL016W	119.22	-0.200485	-0.677647	-0.110602	-0.587764		YIL015W	1358.81	-0.883804	6.45041	-6.2179	1.11631
Tup.314	chrIX	325650	325920	270		0.699107	0.526604	-0.220956	-0.360985		tRNA	8	tT(AGU)I2			286.489	-0.833627	0.000413446		271.353	-1.25411	2.8246e-12		352.661	-0.087979	0.99407		197.673	-0.372666	0.113129			YIL014C-A	59.3239	2.1377	2.88042	-0.131437	0.611282		tT(AGU)I	#N/A	#N/A	#N/A	#N/A	#N/A
Tup.315	chrIX	332360	333690	1330		1.09353	0.912361	2.33206	2.87036		Intergenic	6				6088.91	1.35039	3.74995e-14		7265.44	1.63774	8.50332e-19		3281.2	-0.10271	0.99407		10669.7	0.315261	0.0366549			YIL013C	923.147	3.10283	3.63417	-0.170687	0.360659		YIL011W	686.734	4.01319	4.32566	-0.0222468	0.290218
Tup.316	chrIX	336240	336530	290		0.738659	0.560148	-0.0652897	0.0661379		tRNA	8	tD(GUC)I2			347.803	-0.632924	0.00526295		325.914	-0.876908	4.17241e-10		397.963	-0.152568	0.99407		271.095	-0.25886	0.212216			YIL009C-A	127.009	0.0635942	0.381651	-0.0305052	0.287551		tD(GUC)I	#N/A	#N/A	#N/A	#N/A	#N/A
Tup.317	chrIX	337840	338470	630		-0.103554	-0.163748	2.06721	1.96866		Intergenic	5				1877.36	2.64625	2.71609e-34		1500.63	2.00232	4.23849e-14		526.954	0.051607	0.99407		3049.67	-0.442252	0.0110674			tD(GUC)I	#N/A	#N/A	#N/A	#N/A	#N/A	2 peaks, 1 IG	YIL009W	782.804	0.107835	-0.167447	-0.189404	-0.464686
Tup.318	chrIX	338620	339330	710		1.75412	1.53934	2.11757	1.88199		Intergenic	4				3382.73	0.507587	0.0601446		2692.51	-0.20191	0.396938		2670.87	-0.0968681	0.99407		3496.56	-0.675146	6.89151e-05			tD(GUC)I	#N/A	#N/A	#N/A	#N/A	#N/A	2 peaks, 1 IG	YIL009W	782.804	0.107835	-0.167447	-0.189404	-0.464686
Tup.319	chrIX	370280	370620	340		0.702524	0.580765	0.00215882	-0.299097		tRNA	8	tE(UUC)I			389.557	-0.698468	0.000175652		352.242	-1.21976	1.49996e-17		459.321	-0.118483	0.99407		274.922	-0.503281	0.00944356			YIR006C	3392.66	-0.0976089	-0.0674268	-0.0423326	-0.0121505		tE(UUC)I	#N/A	#N/A	#N/A	#N/A	#N/A
Tup.320	chrIX	380080	381050	970		1.77621	1.68386	1.71952	2.34339		Intergenic	4	GAT4			3751.95	0.360704	0.173213		4714.85	0.894844	8.85049e-05		3100.02	-0.134838	0.99407		5584.97	0.528864	0.000950975			YIR013C	20.5982	2.67979	3.24671	-0.212347	0.354579		YIR014W	73.0006	0.760441	0.528846	0.0523988	-0.179196
Tup.321	chrIX	382140	382460	320		0.191491	0.0820875	0.0320719	0.199847		Intergenic	8	RPR2			316.592	-0.094956	0.668501		332.101	-0.308456	0.10024		327.777	0.0115077	0.99407		324.731	-0.0608807	0.760289			YIR015W	103.123	0.431515	0.179547	0.147654	-0.104315		YIR016W	177.082	0.603991	0.803717	-0.123913	0.0758128
Tup.322	chrIX	384050	384500	450		0.254285	0.214658	0.648979	0.743719		Intergenic	7	MET28			726.731	0.664899	3.06639e-05		700.883	0.140837	0.404086		578.588	0.0906779	0.99407		878.368	-0.296191	0.0557442			YIR017C	82.3239	0.402859	1.07953	0.396103	1.07278		YIR018W	148.745	0.349656	-0.0939846	0.0581012	-0.385539
Tup.323	chrIX	385990	389450	3460		1.69525	1.56922	3.44266	3.5101		Intergenic	2				46256.3	1.8333	1.11787e-11		40819.2	1.55515	1.32986e-09		19302.9	-0.107938	0.99407		71917.2	-0.256943	0.119266			YIR018C-A	88.153	-0.00192274	0.433692	-0.128612	0.307003		YIR019C	160.765	3.41495	2.72093	0.326812	-0.367209
Tup.324	chrIX	393660	395810	2150		1.93148	1.72701	3.60231	3.53662		ORF	2	ICR1	MUC1		41357	0.774071	0.00740171		35280.1	0.439236	0.0993948		28484.4	-0.165987	0.99407		50088.7	-0.371558	0.0284564			ICR1	#N/A	#N/A	#N/A	#N/A	#N/A		MUC1	#N/A	#N/A	#N/A	#N/A	#N/A
Tup.325	chrIX	420720	421110	390		0.660897	0.489228	0.500628	0.478954		Intergenic	1	LYS1	YIR035C		508.821	0.110519	0.47504		489.556	-0.43833	0.000969464		495.45	0.0532634	0.99407		509.499	-0.361007	0.0289933			YIR034C	570.533	0.656199	1.7698	0.0790592	1.19266		YIR035C	597.586	2.21802	1.79672	0.105417	-0.315877
Tup.326	chrIX	421610	422870	1260		0.0680262	-0.018031	2.46498	2.86945		ORF	6	IRC24			6932.42	3.57395	1.44943e-86		7237.94	3.35676	7.74043e-57		1111.69	0.103167	0.99407		14031.2	0.0320547	0.849163			IRC24	200.512	-1.36923	-1.04876	-0.182393	0.138078		0	#N/A	#N/A	#N/A	#N/A	#N/A
Tup.327	chrIX	426560	428000	1440		1.85228	1.80699	4.34021	4.60037		Intergenic	2				28437.4	2.60639	6.50343e-21		26029.9	2.43466	6.9672e-23		7602.08	-0.121046	0.99407		50069.9	-0.163245	0.356618			YIR038C	672.798	1.98813	2.42506	-0.209753	0.227177	2 peaks, 1 IG	YIR039C	381.296	1.40616	1.88318	-0.00293904	0.47408
Tup.328	chrIX	429310	429660	350		-0.37282	-0.35896	-0.550677	1.33956		Intergenic	7				219.258	-0.0469705	0.861419		503.399	1.36782	3.52697e-06		237.501	0.174697	0.99407		506.925	1.73768	7.3266e-23			YIR038C	672.798	1.98813	2.42506	-0.209753	0.227177	2 peaks, 1 IG	YIR039C	381.296	1.40616	1.88318	-0.00293904	0.47408
Tup.329	chrIX	432080	432820	740		-0.423751	-0.271608	1.80438	2.67314		Intergenic	5	YPS6			2313.11	2.89479	3.16859e-31		3728.22	3.24775	1.80215e-26		592.477	0.208203	0.99407		5843	0.709665	2.2439e-07			YIR039C	381.296	1.40616	1.88318	-0.00293904	0.47408	2 peaks, 1 IG	YIR041W	6.6418	0.308514	0.759025	-0.560898	-0.110386
Tup.330	chrIX	433100	433910	810		0.608332	0.467006	2.57998	3.24414		Intergenic	6				4548.13	2.7122	3.98928e-101		6362.89	3.10841	4.12528e-137		1189.82	-0.015964	0.99407		10430.5	0.514811	0.000916296			YIR039C	381.296	1.40616	1.88318	-0.00293904	0.47408	2 peaks, 1 IG	YIR041W	6.6418	0.308514	0.759025	-0.560898	-0.110386
Tup.331	chrV	12810	13190	380		-0.258153	-0.189189	1.41767	0.312713		Intergenic	7				568.68	1.77062	5.30468e-14		322.186	0.149934	0.628462		265.82	0.0809731	0.99407		657.316	-1.39741	7.77657e-15			YEL073C	30.8124	0.115858	0.424478	-0.0433266	0.265293		YEL072W	42.6214	-0.523169	-0.723626	-0.0446585	-0.245115
Tup.332	chrV	18350	19520	1170		2.17026	2.05502	2.8944	3.00047		Intergenic	2				15404.3	1.46569	2.51017e-07		15260.6	1.3223	4.56123e-06		7948.83	-0.0470715	0.99407		23971.4	-0.0651709	0.704923			YEL071W	1911.32	-0.557655	-0.0972313	-0.222295	0.238128		YEL070W	181.339	5.52752	5.91298	-0.197891	0.187571
Tup.333	chrV	23250	24270	1020		2.79995	2.70183	2.97586	3.21947		Intergenic	2				17416.9	0.79186	0.0130383		17047.7	0.595889	0.0519712		12371	-0.0454726	0.99407		22978.3	-0.11578	0.518448			YEL069C	17.2775	4.10118	4.15848	-0.228362	-0.171068		YEL067C	97.1833	3.04103	2.02749	0.34513	-0.668417
Tup.334	chrV	26940	27670	730		0.327127	0.597656	1.74866	1.43653		ORF	5	HPA3			1872.27	1.82991	5.53783e-16		1561.55	0.632466	1.32237e-06		956.556	0.42607	0.316041		2605.71	-0.633466	0.000137274			HPA3	183.971	0.96029	1.05907	-0.271761	-0.172978		0	#N/A	#N/A	#N/A	#N/A	#N/A
Tup.335	chrV	42010	43230	1220		0.810462	0.886457	0.959574	2.1659		Intergenic	4	SOM1			2274.58	-0.202292	0.245297		3557.59	0.680915	2.00488e-05		2429.25	0.0217539	0.99407		3507.4	1.03446	4.16017e-14			YEL059C-A	111.33	1.0895	1.0184	0.22906	0.157959		YEL058W	2628.38	0.320929	0.863427	-0.118439	0.424058
Tup.336	chrV	46010	46950	940		-0.327956	-0.32534	1.79343	2.45241		Intergenic	5				2819.39	2.98942	2.08052e-32		4373.75	3.32873	6.01915e-34		670.016	0.164106	0.99407		7007.8	0.651208	8.78916e-05			YEL057C	33.272	1.47025	1.23597	0.380713	0.14643		YEL056W	345.561	0.0531667	0.210306	-0.0512236	0.105915
Tup.337	chrV	52490	53130	640		0.486263	0.438038	-0.754485	-0.915341		ORF	3	RPL12A			538.537	-1.12711	2.84762e-13		531.771	-1.76806	1.2035e-12		734.5	0.000732023	0.996447		312.684	-0.512884	0.0273913			RPL12A	7617.49	-0.0944115	-0.195021	-0.108278	-0.208888		0	#N/A	#N/A	#N/A	#N/A	#N/A
Tup.338	chrV	56230	56530	300		-0.60825	-0.382017	-0.00431333	1.1009		Intergenic	7				235.969	0.6094	0.0721062		387.368	1.17636	0.00629307		200.431	0.17579	0.99407		444.525	0.909368	0.000442418			YEL053C	621.345	-0.120326	-0.243347	0.112359	-0.0106615		YEL052W	589.257	0.113481	0.276733	-0.131615	0.0316368
Tup.339	chrV	61210	62060	850		0.655187	0.466542	-0.450435	-0.593957		snRNA	3				871.029	-1.02878	1.57785e-08		840.773	-1.50807	1.14542e-19		1136.86	-0.0604494	0.99407		545.138	-0.407066	0.035667			snR67	180.118	0.0018902	-0.0615741	0.0788221	0.0153578		snR53	11.4988	0.310959	-0.0832568	-0.173977	-0.568192
Tup.340	chrV	66850	67410	560		0.352448	0.226237	-0.0885534	0.492985		Intergenic	8	GLY1			589.816	-0.320062	0.0359816		728.233	0.00771129	0.966618		651.336	-0.00669659	0.99407		676.536	0.461702	0.00312975			YEL047C	1202.03	0.762319	1.43714	-0.294498	0.380326		YEL046C	4716.76	-0.344102	0.116533	-0.172795	0.28784
Tup.341	chrV	67500	69800	2300		0.740297	0.643187	0.111337	0.266283		ORF	8	GLY1	IES6		3961.6	-0.0271274	0.873691		4408.17	-0.018806	0.892775		3969.62	0.00156677	0.996092		4487.62	0.142073	0.380505			GLY1	4716.76	-0.344102	0.116533	-0.172795	0.28784		IES6	169.674	-0.0637234	-0.193247	0.129053	-0.000471119
Tup.342	chrV	75340	75620	280		0.6645	0.305882	0.409475	-0.00189643		Intergenic	8	GDA1			381.494	0.00742451	0.965317		296.9	-0.708099	7.07319e-06		353.823	-0.201809	0.99407		328.507	-0.781243	6.53176e-06			YEL042W	4046.75	0.0717922	-0.0757572	-0.104755	-0.252305		YEL041W	59.0523	0.395189	0.763132	-0.20692	0.161023
Tup.343	chrV	76940	79460	2520		1.25041	1.08379	1.62198	1.66674		ORF	4	UTR2	YEF1		18829	1.0728	5.25752e-05		19552.6	1.21407	1.45108e-06		11271	-0.182603	0.99407		28534.5	0.0877354	0.600618			UTR2	5966.46	-0.580537	-1.67763	0.0864308	-1.01066		YEF1	59.0523	0.395189	0.763132	-0.20692	0.161023
Tup.344	chrV	80100	80420	320		0.1688	0.184606	0.389513	0.975409		Intergenic	7	CYC7			417.97	0.509662	0.0177914		463.793	0.480948	0.00136861		345.737	0.0129288	0.99407		557.078	0.118132	0.548173			YEL039C	139.566	2.5518	2.52511	0.283783	0.2571		YEL038W	394.751	0.85013	0.744294	-0.111315	-0.217151
Tup.345	chrV	80630	80920	290		-0.169197	-0.269083	-0.598659	0.713076		ORF	7	UTR4			188.051	-0.389691	0.128234		302.806	0.606011	0.0482168		214.329	0.00820683	0.99407		284.029	1.1517	8.0043e-10			UTR4	394.751	0.85013	0.744294	-0.111315	-0.217151		0	#N/A	#N/A	#N/A	#N/A	#N/A
Tup.346	chrV	84940	86850	1910		1.34387	1.22357	0.369843	0.376016		ORF	1	HYP2	MTC7		5234.8	-0.969068	1.29282e-05		4925.98	-1.34716	1.42108e-08		6596.38	-0.113262	0.99407		3413.99	-0.368036	0.00919436			HYP2	26344	-0.261666	-0.286395	-0.0671969	-0.0919254		MTC7	3218.45	-0.572806	-0.322789	-0.281333	-0.0313161
Tup.347	chrV	99960	100370	410		0.556602	0.496459	-0.135495	-0.267212		tRNA	8				515.588	-0.607353	0.000666567		474.193	-1.18543	1.39997e-12		603.225	-0.0674709	0.99407		377.213	-0.513724	0.00538527			YEL029C	195.125	-0.137172	-0.124891	-0.0498104	-0.0375289		tM(CAU)E	#N/A	#N/A	#N/A	#N/A	#N/A
Tup.348	chrV	106760	107160	400		0.708267	0.554444	-0.456945	-0.657516		Intergenic	3				440.208	-1.17976	1.33383e-09		434.419	-1.65394	9.77292e-12		598.304	-0.0423245	0.99407		259.058	-0.393561	0.127091			YEL025C	912.01	0.0885071	0.153795	-0.141822	-0.0765343		YEL024W	2091.06	0.17827	0.611326	-0.246113	0.186943
Tup.349	chrV	117560	118180	620		0.777439	0.682116	0.0323871	0.0933724		Pol III	8	RPR1			787.48	-0.525934	0.000139593		794.699	-0.826274	1.18636e-10		916.339	-0.0207824	0.99407		658.097	-0.188036	0.2467			RPR1	5432.87	0.0885276	-0.0616465	-0.0667792	-0.216953		YEL020C	169.918	-0.0828188	0.300552	-0.0585042	0.324867
Tup.350	chrV	123130	123450	320		0.322647	0.0693219	0.0192406	0.656903		ORF	7	GTT3			378.402	-0.215384	0.347752		432.375	-0.0188702	0.925334		398.342	-0.0605718	0.99407		420.667	0.277156	0.127206			GTT3	557.763	0.338318	-0.0821797	0.04685	-0.373648		0	#N/A	#N/A	#N/A	#N/A	#N/A
Tup.351	chrV	135310	135610	300		0.741757	0.636623	0.05356	-0.151113		tRNA	8	tK(CUU)E1			380.759	-0.78038	0.000180048		347.337	-1.27416	6.80041e-16		458.371	-0.117371	0.99407		261.018	-0.473754	0.0224531			YEL011W	1041.32	2.42526	3.03535	-0.171223	0.438871		tK(CUU)E	#N/A	#N/A	#N/A	#N/A	#N/A
Tup.352	chrV	138550	141730	3180		1.2105	1.09996	0.459147	0.364508		Intergenic	1	GCN4			10516.7	-0.503869	0.0344523		10127.3	-0.701451	0.00190989		11716.9	-0.117471	0.99407		8860.34	-0.187144	0.202566			YEL009C	7589.37	0.194676	0.427112	0.0307646	0.263201		YEL007W	1085.88	0.228066	0.0522087	0.0327635	-0.143094
Tup.353	chrV	143890	144140	250		-0.089328	-0.08894	0.795252	0.907012		Intergenic	7	TOS9			371.632	1.11944	7.02428e-11		357.568	0.561641	0.00200563		246.394	0.146389	0.99407		504.384	-0.271582	0.113129			YEL007W	1085.88	0.228066	0.0522087	0.0327635	-0.143094		YEL006W	426.579	-0.201867	-0.16154	-0.13263	-0.092304
Tup.354	chrV	151880	153440	1560		2.01856	1.94112	2.19923	2.2655		Intergenic	4				12742.6	0.652639	0.0164629		11910.6	0.449281	0.0901413		9407.41	-0.11628	0.99407		15833.5	-0.190987	0.240574			YEL001C	1849.69	0.245556	0.446953	-0.0736208	0.127776		YER001W	1688.65	0.0158449	-0.103077	0.0501496	-0.0687718
Tup.355	chrV	173650	175280	1630		0.660658	0.485979	3.27479	3.73735		Intergenic	6				25060.6	3.49066	6.21645e-58		25284.9	3.34191	4.12903e-73		4060.56	0.00372952	0.995106		49678.3	-0.00933993	0.964365			YER010C	252.803	0.387656	0.350412	0.178279	0.141035		YER011W	1137.89	5.78746	5.47109	0.484493	0.168116
Tup.356	chrV	176970	177330	360		0.67385	0.463728	0.267197	0.182514		tRNA	8	tE(UUC)E1			445.817	-0.408885	0.0299509		414.557	-0.73898	3.26095e-07		483.962	-0.122914	0.99407		374.338	-0.316752	0.0883333			YER011W	1137.89	5.78746	5.47109	0.484493	0.168116		tE(UUC)E	#N/A	#N/A	#N/A	#N/A	#N/A
Tup.357	chrV	192060	192710	650		0.334486	0.134174	0.0183346	0.697092		ORF	7	SPC25			691.189	-0.125665	0.447379		867.052	0.0966244	0.571922		734.727	0.0602201	0.99407		840	0.424496	0.00784869			SPC25	134.133	0.351236	0.325076	0.0131757	-0.012985		0	#N/A	#N/A	#N/A	#N/A	#N/A
Tup.358	chrV	193320	193670	350		-0.09288	-0.0724371	0.38238	0.916009		ORF	7	ISC1			307.71	0.607863	0.00412576		376.34	0.601264	0.0242454		255.903	0.133382	0.99407		444.703	0.265222	0.166995			ISC1	758.153	0.0355436	0.594999	-0.126635	0.43282		0	#N/A	#N/A	#N/A	#N/A	#N/A
Tup.359	chrV	194610	195250	640		0.0616909	0.19635	2.56045	2.95056		Intergenic	6	GPA2			2917.26	3.27951	4.37609e-65		3475.15	3.20207	6.68248e-73		577.678	0.163703	0.99407		6243.34	0.232084	0.125765			YER019C-A	724.054	-0.189113	-0.140821	0.0848274	0.13312		YER020W	320.481	0.0668314	-0.170577	-0.0195589	-0.256967
Tup.360	chrV	211420	212870	1450		0.00587828	0.0699424	2.93462	3.51191		Intergenic	6	MIG3	SMB1		14937.1	4.39347	5.1616e-120		15718.1	4.20219	2.27704e-150		1401.74	0.0990054	0.99407		31478.1	0.052604	0.757777			YER028C	138.039	0.902608	0.0498499	0.243244	-0.609514		YER029C	123.436	-0.0524264	-0.457122	0.135519	-0.269177
Tup.361	chrV	221210	222090	880		1.16456	1.10012	0.933763	1.31885		Intergenic	1	YER034W	ZRG8		2258.61	-0.110938	0.61662		2501.28	-0.0657622	0.766231		2306.33	-0.0187763	0.99407		2491.72	0.158549	0.302542			YER033C	445.229	1.32746	1.1376	0.0570142	-0.132853		YER034W	99.8038	0.507736	0.11126	0.257255	-0.139222
Tup.362	chrV	225410	225770	360		1.38925	1.20592	0.507644	0.742847		Intergenic	1				722.746	-0.821756	1.46176e-05		715.247	-0.866745	2.25806e-06		871.075	-0.144659	0.99407		555.589	-0.0572938	0.752278			YER036C	4257.61	-0.151781	-0.385142	-0.0714352	-0.304796		YER037W	418.607	1.22157	1.14419	0.0464003	-0.0309824
Tup.363	chrV	237820	238570	750		1.22105	1.0599	0.736214	0.558861		ORF	1	ERG28	MEI4		1572.25	-0.128716	0.491407		1515.4	-0.540712	0.0093973		1617.81	-0.0159742	0.99407		1478.95	-0.300394	0.0612766			ERG28	846.481	0.493282	0.398069	-0.04989	-0.145103		MEI4	51.5985	0.970929	1.17014	-0.135306	0.0639078
Tup.364	chrV	241640	243320	1680		2.10495	2.01764	3.1846	3.26396		Intergenic	2	SPO73			17452.4	1.20647	1.20399e-05		16267.2	0.971679	0.000336294		10134.2	-0.0808795	0.99407		24799.8	-0.187943	0.243591			YER045C	486.542	1.71528	1.61978	0.293498	0.198004		YER046W	83.0534	0.859098	1.17728	-0.14113	0.177049
Tup.365	chrV	250120	250500	380		0.537029	0.361063	-0.3023	-0.0532579		tRNA	8				368.846	-0.953637	4.99504e-07		381.712	-0.887019	1.95246e-10		463.078	-0.126604	0.99407		280.053	0.0792915	0.711277			YER048C	655.634	0.181114	-0.00153017	0.0963771	-0.0862668		tQ(UUG)E	#N/A	#N/A	#N/A	#N/A	#N/A
Tup.366	chrV	260090	261890	1800		0.94715	0.870977	1.47859	1.80397		Intergenic	4	YER053C-A			6459.15	1.09041	5.0067e-09		7199.19	1.26978	8.37967e-13		3934.84	-0.113621	0.99407		10245.5	0.19708	0.176239			YER053C-A	363.615	1.65375	1.60682	0.0939385	0.0470113		YER054C	114.459	2.4932	2.7802	0.0633305	0.350329
Tup.367	chrV	263880	264880	1000		0.0025414	-0.015898	0.957095	2.4931		Intergenic	5	GIP2			1369.03	1.27268	6.05223e-13		3192.13	2.53578	1.83391e-28		819.996	0.0708842	0.99407		3986.78	1.48078	3.82486e-20			YER054C	114.459	2.4932	2.7802	0.0633305	0.350329		YER055C	1914.47	-0.324177	0.146428	-0.029908	0.440698
Tup.368	chrV	265940	266550	610		1.07796	0.973338	0.78213	0.727071		Intergenic	1	FCY2			1206.31	-0.246314	0.203933		1177.64	-0.58112	9.81306e-05		1279.56	-0.036171	0.99407		1107.2	-0.241539	0.105285			YER055C	1914.47	-0.324177	0.146428	-0.029908	0.440698		YER056C	4108.96	0.279334	0.11292	-0.12022	-0.286635
Tup.369	chrV	267780	268120	340		0.50725	0.331006	-0.709397	-0.89055		ORF	3	FCY2			271.146	-1.20492	3.7561e-13		271.272	-1.53478	3.73541e-08		368.383	-0.0625777	0.99407		163.285	-0.263444	0.340123			FCY2	4108.96	0.279334	0.11292	-0.12022	-0.286635		0	#N/A	#N/A	#N/A	#N/A	#N/A
Tup.370	chrV	268350	268990	640		0.313439	0.272284	0.488823	0.829915		Intergenic	7				986.349	0.303691	0.0457379		1002.12	0.146819	0.359377		865.239	-0.0476163	0.99407		1158.11	-0.0682764	0.704923			YER056C	4108.96	0.279334	0.11292	-0.12022	-0.286635		YER056C-A	3075.97	-0.219158	-0.519177	0.268638	-0.0313812
Tup.371	chrV	269300	269770	470		0.480761	0.340929	-0.591557	-0.901069		ORF	3	RPL34A			388.858	-1.07392	3.97205e-11		382.598	-1.55762	2.46584e-14		517.504	-0.0374758	0.99407		239.738	-0.389538	0.0762847			RPL34A	3075.97	-0.219158	-0.519177	0.268638	-0.0313812		0	#N/A	#N/A	#N/A	#N/A	#N/A
Tup.372	chrV	280920	281210	290		0.111614	0.329755	-0.36691	-0.0405241		Intergenic	8				331.99	-0.531403	0.0114031		371.595	-0.737759	0.000225441		403.341	0.086633	0.99407		297.212	0.0114825	0.96573			YER062C	663.446	1.91009	2.14036	-0.0232405	0.207032		YER063W	321.516	0.403577	-0.0609214	0.0169039	-0.447594
Tup.373	chrV	284590	285140	550		0.700266	0.603585	1.05096	0.9345		Intergenic	1				1237.07	0.406679	0.00500388		1093.66	-0.225936	0.0430794		1055.48	-0.00361186	0.99407		1308.92	-0.503234	0.000765539			YER064C	1009.44	0.0107351	0.0230253	-0.0458448	-0.0335546		YER065C	151.068	0.58158	0.955228	0.120797	0.494445
Tup.374	chrV	288340	288610	270		0.556874	0.402478	-0.408056	-0.491289		tRNA	3	SUP19			266.957	-1.02896	1.40036e-08		252.985	-1.38856	3.63481e-17		341.117	-0.117093	0.99407		170.759	-0.346526	0.117206			YER065C	151.068	0.58158	0.955228	0.120797	0.494445		tS(UGA)E	#N/A	#N/A	#N/A	#N/A	#N/A
Tup.375	chrV	291530	291910	380		-0.571124	-0.460311	0.643168	1.056		Intergenic	7	RGI1			408.675	1.45019	3.9063e-08		496.891	1.29434	0.00010937		238.715	0.229356	0.99407		704.342	0.2192	0.225643			YER066W	68.1032	0.332115	0.521616	-0.194366	-0.00486564		YER067W	221.236	1.69889	1.98537	-0.0257142	0.260759
Tup.376	chrV	298310	298650	340		0.183332	0.229568	0.0452382	0.673491		Intergenic	7				391.071	-0.103538	0.537067		487.16	-0.0804248	0.695986		425.71	0.149418	0.99407		458.528	0.309331	0.0823557			YER069W	1311.36	-0.875901	1.36208	-0.257036	1.98094		YER070W	6350.02	0.439197	0.568581	-0.218291	-0.0889072
Tup.377	chrV	302850	303170	320		0.388384	0.229459	-0.943866	-0.881447		ORF	3	VTC1			237.336	-1.26993	4.16972e-13		249.092	-1.6666	3.11328e-19		335.694	0.0198363	0.99407		139.748	-0.244829	0.32556			VTC1	3371.99	-0.245438	-0.344686	-0.0861371	-0.185385		0	#N/A	#N/A	#N/A	#N/A	#N/A
Tup.378	chrV	303420	304890	1470		0.472778	0.329005	0.0559521	-0.0710283		ORF	8	ALD5			1729.65	-0.0795278	0.537067		1612.81	-0.584463	1.42065e-05		1749.79	-0.0310885	0.99407		1605.69	-0.400302	0.00402833			ALD5	1796.14	-0.88276	-0.11478	-0.0727752	0.695205		0	#N/A	#N/A	#N/A	#N/A	#N/A
Tup.379	chrV	311380	312240	860		1.13204	1.04538	0.629857	0.642088		tRNA	1				1529.19	-0.401346	0.0222595		1483.77	-0.802631	1.04968e-06		1706.43	-0.0293465	0.99407		1296.9	-0.302517	0.035667			YER075C	463.7	0.668378	0.145757	0.219315	-0.303307		tA(UGC)E	#N/A	#N/A	#N/A	#N/A	#N/A
Tup.380	chrV	322120	322820	700		0.385429	0.259932	-0.566862	-0.927754		ORF	3	SER3	SRG1		614.69	-1.0379	4.14432e-11		591.474	-1.66848	2.7136e-13		813.118	-0.0318263	0.99407		369.732	-0.531198	0.015316			SER3	438.877	-0.155112	1.89456	0.114117	2.16379		SRG1	#N/A	#N/A	#N/A	#N/A	#N/A
Tup.381	chrV	335420	335900	480		0.605809	0.591697	0.500066	1.26394		ORF	1	PTC2			704.029	-0.0509669	0.728825		936.213	0.389048	0.00611843		718.602	0.023957	0.99407		945.607	0.598821	0.000108245			PTC2	2064.62	-0.0575989	0.201921	-0.0581848	0.201335		0	#N/A	#N/A	#N/A	#N/A	#N/A
Tup.382	chrV	342390	342840	450		0.748242	0.827539	0.201298	0.171994		Intergenic	8				731.746	-0.662943	2.51934e-05		744.614	-1.14348	1.34154e-11		903.96	0.0464993	0.99407		557.606	-0.307709	0.091098			YER091C	17447.5	-0.895923	-0.0788667	-0.131834	0.685222		YER092W	171.266	-0.045336	0.032427	0.0155218	0.0932847
Tup.383	chrV	351260	351620	360		0.805708	0.715839	0.676586	1.14842		Intergenic	1	RAD51			564.779	-0.0343272	0.825488		678.672	0.186029	0.175387		567.601	0.00226521	0.99407		692.069	0.356546	0.0346002			YER095W	1071.96	0.528065	1.08041	-0.278919	0.273424		YER096W	373.381	3.46878	4.0789	0.156168	0.766288
Tup.384	chrV	354800	355380	580		0.911798	0.729266	0.486171	0.298534		tRNA	8				851.106	-0.362262	0.0336672		787.745	-0.933074	2.72283e-11		936.97	-0.0375412	0.99407		695.739	-0.47875	0.00277862			YER096W	373.381	3.46878	4.0789	0.156168	0.766288		tE(UUC)E	#N/A	#N/A	#N/A	#N/A	#N/A
Tup.385	chrV	362940	363610	670		0.39821	0.392086	-0.783294	-1.05718		ORF	3	RPS8B			516.018	-1.20391	4.01132e-12		519.763	-1.81972	2.30532e-12		719.687	0.0173691	0.99407		292.085	-0.470477	0.0527194			RPS8B	3229.8	-0.354261	-0.461471	-0.0257765	-0.132986		0	#N/A	#N/A	#N/A	#N/A	#N/A
Tup.386	chrV	377660	378830	1170		1.30029	1.08419	2.68173	3.96119		Intergenic	6	KAP123			6507.26	2.07768	1.78751e-21		13127.5	3.22778	3.12783e-72		2365.64	-0.120512	0.99407		18471.3	1.16317	1.97733e-15			YER109C	311.244	-0.119561	-0.410964	0.0263691	-0.265035		YER110C	9155.37	-0.13785	-0.0649377	-0.151672	-0.0787596
Tup.387	chrV	386160	386950	790		0.89811	0.82872	-0.0683001	-0.225869		Intergenic	8				1090.13	-0.91089	1.35488e-07		1101.81	-1.14409	6.79797e-14		1383.64	-0.0540076	0.99407		779.778	-0.158749	0.326814			YER111C	666.814	0.28459	0.145148	0.0249524	-0.11449		YER112W	275.804	0.0627366	-0.417529	0.263185	-0.21708
Tup.388	chrV	397090	397500	410		0.37909	0.3861	-0.800742	-1.07835		ORF	3	RPL23B			293.795	-1.10219	5.62328e-07		311.507	-1.89137	2.8969e-19		418.278	0.137226	0.99407		172.439	-0.519712	0.0522414			RPL23B	4624.03	-0.212	-0.306298	0.0464459	-0.0478523		0	#N/A	#N/A	#N/A	#N/A	#N/A
Tup.389	chrV	399200	399540	340		-0.1025	-0.290606	-0.774438	1.25869		Intergenic	7	AVT6			226.415	-0.528514	0.0755329		475.052	1.02245	0.00244668		274.058	0.0660951	0.99407		443.256	1.7676	2.65827e-17			YER118C	1059.47	-0.0848477	-0.0622005	-0.0484015	-0.0257542		YER119C	590.687	0.431473	0.57076	-0.149661	-0.0103729
Tup.390	chrV	401660	401930	270		-0.275144	-0.3512	-0.494433	0.83353		ORF	7	SCS2			167.545	-0.148213	0.600635		266.282	0.954983	0.000177129		169.598	-0.117806	0.99407		274.931	1.12931	5.99434e-08			SCS2	2314.36	0.12028	-0.330389	0.14396	-0.306709		0	#N/A	#N/A	#N/A	#N/A	#N/A
Tup.391	chrV	409180	409600	420		0.849131	0.66188	-0.427249	-0.521456		Intergenic	3				481.328	-1.14175	6.48855e-15		506.947	-1.59807	1.95429e-33		669.882	0.0535745	0.99407		298.502	-0.271886	0.155026			YER124C	1072.64	0.268142	0.0587586	-0.184787	-0.39417		YER125W	4940.19	0.0859113	0.207313	-0.100367	0.0210352
Tup.392	chrV	424620	425150	530		0.504811	0.54366	-0.717799	-0.953389		snRNA	3	PMD1	SNR4		462.768	-1.28536	1.50538e-11		470.575	-1.91018	3.82883e-16		658.114	0.0244011	0.99407		252.141	-0.470335	0.0592025			snR4	1281.43	0.109127	-0.0460558	0.427984	0.272801		YER132C	1388.93	-0.134492	-0.233164	0.0731107	-0.0255612
Tup.393	chrV	431100	431470	370		0.705795	0.558576	-0.26877	-0.422295		snRNA	8	SNR52			408.055	-1.01928	4.01884e-07		382.779	-1.37546	1.22277e-12		518.173	-0.131361	0.99407		260.527	-0.35612	0.103087			snR52	65.5063	-0.0958974	-0.447828	-0.178615	-0.530546		YER133W	1448.6	-0.0743519	-0.051547	0.0557506	0.0785555
Tup.394	chrV	435640	435930	290		0.854224	0.615303	0.138176	-0.0711138		tRNA	8	tK(CUU)E2			394.076	-0.628226	0.00119745		348.497	-1.09549	3.54748e-10		449.355	-0.15755	0.99407		287.36	-0.492438	0.0131573			tH(GUG)E	#N/A	#N/A	#N/A	#N/A	#N/A		tK(CUU)E	#N/A	#N/A	#N/A	#N/A	#N/A
Tup.395	chrV	441920	442530	610		0.754632	0.5556	-0.0944712	-0.249047		Pol III	8	SCR1			793.378	-0.834355	0.000167944		739.595	-1.10996	5.88532e-10		956.12	-0.154751	0.99407		559.973	-0.297946	0.101507			SCR1	129207	0.025589	0.40378	-0.30047	0.077721		0	#N/A	#N/A	#N/A	#N/A	#N/A
Tup.396	chrV	448600	449060	460		0.354227	0.300559	0.161448	0.609807		Intergenic	7				626.904	-0.20887	0.210622		767.2	0.059581	0.746737		671.483	0.00365007	0.99407		736.113	0.409377	0.0132354			tI(AAU)E	#N/A	#N/A	#N/A	#N/A	#N/A		YER138W-A	57.6855	-0.536525	-0.901873	-0.190291	-0.555639
Tup.397	chrV	461390	462510	1120		1.33998	1.33703	2.21648	2.74982		Intergenic	4	FTR1			6927.84	1.28578	8.82353e-08		7452.84	1.06266	3.43613e-05		4153.3	0.119506	0.99407		10758.2	0.0250768	0.888793			YER145C	2725.23	0.237317	-0.347575	-0.15758	-0.742472		YER146W	169.074	-0.384794	-1.0295	0.16578	-0.478925
Tup.398	chrV	462660	463630	970		-0.0323575	0.0393918	0.5077	0.838576		ORF	7	LSM5	SCC4		989.537	0.892587	1.05482e-05		1167.93	0.684642	0.00865907		746.699	0.209036	0.99407		1471.92	0.14464	0.352578			LSM5	169.074	-0.384794	-1.0295	0.16578	-0.478925		SCC4	199.156	-0.0806738	-0.0600397	-0.0942381	-0.073604
Tup.399	chrV	467920	468250	330		0.246582	0.293985	0.394221	1.01553		Intergenic	7				387.603	0.230961	0.138364		530.244	0.309465	0.0422813		389.744	0.255151	0.99407		542.686	0.469493	0.00766497			YER149C	196.962	0.230862	-0.402884	0.0937643	-0.539982		YER150W	436.857	4.68208	3.95176	0.434832	-0.29548
Tup.400	chrV	490800	491960	1160		2.23876	2.00078	2.25264	2.62975		Intergenic	2	BUR6			10772.9	-0.0490756	0.86656		11259.6	0.10619	0.73186		10267.8	-0.153375	0.99407		12020.7	0.127804	0.435562			YER158C	303.694	1.97892	2.30817	-0.0552905	0.273961		YER159C	318.866	-0.086098	0.0815385	0.180974	0.348611
Tup.401	chrV	492240	492560	320		0.849881	0.695316	0.00962188	0.115562		tRNA	8	tR(ACG)E			417.167	-0.882627	4.1103e-05		434.102	-1.06733	2.86418e-15		530.703	-0.0297115	0.99407		309.685	-0.0784749	0.704923			YER159C	318.866	-0.086098	0.0815385	0.180974	0.348611		tR(ACG)E	#N/A	#N/A	#N/A	#N/A	#N/A
Tup.402	chrV	544740	544990	250		0.251008	0.253636	-0.065292	0.486588		ORF	7	ECM32			252.085	-0.168717	0.408648		304.403	-0.245174	0.245664		281.184	0.148876	0.99407		278.149	0.212705	0.287795			ECM32	598.777	-0.299386	-0.513976	0.0707093	-0.14388		0	#N/A	#N/A	#N/A	#N/A	#N/A
Tup.403	chrV	558600	558850	250		0.575732	0.227984	0.738956	-0.325604		ORF	8	YER184C			345.504	0.197977	0.348983		227.573	-0.949808	0.000141535		293.911	-0.260205	0.99407		282.945	-1.2735	1.38646e-09			YER184C	296.838	0.364592	1.20978	-8.7779e-05	0.845105	2 peaks, 1 IG	0	#N/A	#N/A	#N/A	#N/A	#N/A
Tup.404	chrV	559020	559360	340		0.510456	0.383985	1.03217	1.40865		Intergenic	1				511.34	0.593901	2.70703e-05		573.745	0.802931	3.32307e-07		390.002	-0.115835	0.99407		726.218	0.233439	0.181437			YER184C	296.838	0.364592	1.20978	-8.7779e-05	0.845105	2 peaks, 1 IG	YER185W	52.8811	0.663284	3.48314	-0.494018	2.32584
Tup.405	chrV	567580	567960	380		-0.545805	-0.305718	1.26914	1.87421		Intergenic	5				479.881	1.90365	4.14721e-10		657.167	1.83105	4.98571e-10		231.023	0.344368	0.99407		963.802	0.416758	0.0342175			YER187W	10.8213	-0.189034	-0.0619693	0.268324	0.395388		YER188C-A	#N/A	#N/A	#N/A	#N/A	#N/A
Tup.406	chrVI	8070	8750	680		0.403459	0.498718	1.40812	1.85274		Intergenic	5				1484.4	1.68135	4.27806e-30		1809.52	1.62859	3.27719e-43		746.157	0.178662	0.99407		2698.25	0.260742	0.0842608			YFL062W	20.0513	-0.629945	1.22272	-0.628793	1.22387		YFL061W	5.4578	1.14821	1.83588	-0.215298	0.472365
Tup.407	chrVI	18680	20160	1480		1.72418	1.63368	2.09684	2.25897		ORF	4	AGP3			11778.8	1.15944	3.20548e-05		10510	0.839141	0.00173735		6976.85	-0.0910887	0.99407		16049.8	-0.282297	0.0944271			AGP3	89.3253	-1.45582	-0.88157	-0.160315	0.413933		0	#N/A	#N/A	#N/A	#N/A	#N/A
Tup.408	chrVI	22030	23330	1300		-0.225071	-0.201794	1.04553	1.96851		Intergenic	5	YFL054C			2586.85	2.39483	4.97101e-46		3106.27	2.35909	3.4851e-24		865.626	0.13534	0.99407		5147.72	0.244204	0.0942889			YFL054C	283.97	1.40254	1.56065	-0.0829981	0.0751187		YFL053W	127.062	4.79364	5.07072	-0.820354	-0.543267
Tup.409	chrVI	27400	28380	980		0.356794	0.179412	3.50244	3.76977		Intergenic	6				9586.44	4.22949	9.68882e-115		9880.36	4.12492	1.06694e-190		961.878	-0.00839243	0.99407		19905.3	0.0273372	0.877581			YFL053W	127.062	4.79364	5.07072	-0.820354	-0.543267		YFL052W	165.549	0.766874	1.66485	-0.205562	0.692412
Tup.410	chrVI	30550	32470	1920		1.59185	1.49122	3.09683	3.22693		Intergenic	2	YFL052W			23807.2	1.85399	2.09324e-10		22405.2	1.77123	2.16491e-11		9638.92	-0.161084	0.99407		38839.8	-0.116439	0.492995			YFL051C	34.3466	3.27621	3.31145	0.2562	0.291432		YFL050C	278.231	0.286746	0.373735	0.0844631	0.171452
Tup.411	chrVI	64260	64960	700		0.461162	0.431907	-0.836565	-0.977777		ORF	3	RPL22B			551.081	-1.29744	3.95287e-12		545.56	-1.72149	4.87133e-11		763.267	-0.0556513	0.99407		308.366	-0.352231	0.165043			RPL22B	402.358	-0.456808	-0.657143	0.290572	0.0902362		0	#N/A	#N/A	#N/A	#N/A	#N/A
Tup.412	chrVI	75040	76490	1450		0.186078	0.0429801	-0.675885	-0.968066		ORF	3	HAC1			953.146	-0.834105	1.51767e-06		932.516	-1.46398	1.06182e-09		1220.29	0.008573	0.99407		636.81	-0.489094	0.0192419			HAC1	13868.5	0.140533	0.688353	-0.167171	0.380649		0	#N/A	#N/A	#N/A	#N/A	#N/A
Tup.413	chrVI	82010	83010	1000		0.510029	-0.315138	-0.198934	-0.13072		ORF	8	STE2			1032.3	-0.633647	6.82382e-05		843.721	0.137894	0.633988		982.644	-0.799654	0.0269525		914.515	0.112191	0.521591			STE2	3092.9	-0.0868981	6.39232	-6.50777	-0.0285502		0	#N/A	#N/A	#N/A	#N/A	#N/A
Tup.414	chrVI	95360	96420	1060		0.622717	0.493651	0.544634	0.731709		Intergenic	1	GAT1			1305.63	0.0930777	0.461769		1448.47	0.00786637	0.950826		1274.18	0.042294	0.99407		1511.79	0.0913259	0.53461			YFL022C	1840.32	-0.296185	-0.422926	-0.0209119	-0.147653		YFL021W	890.857	-0.411333	-0.519741	0.304326	0.195918
Tup.415	chrVI	97580	98230	650		0.433704	0.449745	2.26729	2.46907		Intergenic	6				2149.13	2.35979	2.45528e-25		2203.55	2.16629	1.20538e-48		708.213	0.0420988	0.99407		3884.87	-0.00747135	0.97542			YFL021W	890.857	-0.411333	-0.519741	0.304326	0.195918	2 peaks, 1 IG	YFL020C	35.5256	2.68925	4.88461	0.104736	2.3001
Tup.416	chrVI	98550	99410	860		1.0154	0.914754	2.57962	2.87127		Intergenic	6	PAU5			5265.18	2.62559	3.51288e-42		5455.3	2.53887	5.10043e-58		1444.92	-0.0224103	0.99407		9910.52	0.0279123	0.880823			YFL021W	890.857	-0.411333	-0.519741	0.304326	0.195918	2 peaks, 1 IG	YFL020C	35.5256	2.68925	4.88461	0.104736	2.3001
Tup.417	chrVI	99480	100280	800		-0.336028	-0.385999	1.57299	2.15264		Intergenic	5				1553.59	2.4821	4.0476e-19		2308.88	2.83995	4.86811e-18		489.48	0.0981419	0.99407		3615.61	0.599022	0.00190793			YFL020C	35.5256	2.68925	4.88461	0.104736	2.3001	2 peaks, 1 IG	tP(UGG)F	#N/A	#N/A	#N/A	#N/A	#N/A
Tup.418	chrVI	101260	101570	310		0.754823	0.579897	0.331284	0.270916		tRNA	8	SUF9			364.189	-0.341356	0.0563229		340.234	-0.646178	5.19784e-05		387.353	-0.117569	0.99407		316.821	-0.290702	0.119876			YFL020C	35.5256	2.68925	4.88461	0.104736	2.3001	2 peaks, 1 IG	tP(UGG)F	#N/A	#N/A	#N/A	#N/A	#N/A
Tup.419	chrVI	106300	106940	640		1.53942	1.28844	1.64414	2.08309		Intergenic	4				2727.36	0.403466	0.118418		2886.32	0.532562	0.0272645		2217.93	-0.135093	0.99407		3520.06	0.123896	0.502336			YFL016C	892.585	-0.0233832	0.0205413	-0.162673	-0.118748		YFL014W	669.751	5.43373	4.97709	0.635379	0.178734
Tup.420	chrVI	114350	114800	450		-0.447062	-0.449296	0.591341	1.71208		Intergenic	7				487.818	1.21057	8.84935e-06		827.9	1.89685	4.92875e-09		304.364	0.087807	0.99407		1073.55	0.920612	2.51043e-06			YFL011W	42.5105	3.32569	4.78545	-0.248744	1.21101		YFL010W-A	#N/A	#N/A	#N/A	#N/A	#N/A
Tup.421	chrVI	131260	131640	380		0.310629	0.456234	1.54464	1.43223		Intergenic	5	RUF20			864.096	1.39034	8.41662e-11		762.407	0.653912	5.69917e-06		503.294	0.159405	0.99407		1178.33	-0.434923	0.025606			RUF20	18.5471	-0.0784451	-1.33178	0.428503	-0.824832		YFL004W	2257.78	0.00542678	-0.210896	-0.0799857	-0.296308
Tup.422	chrVI	137390	137640	250		0.49082	0.36804	-0.425584	-0.455888		tRNA	3	tN(GUU)F			244.034	-0.921173	8.70528e-08		242.905	-1.26046	1.32986e-09		311.812	-0.0462596	0.99407		168.284	-0.256843	0.291339			YFL003C	18.6027	-0.702128	0.408839	-0.600026	0.51094		tN(GUU)F	#N/A	#N/A	#N/A	#N/A	#N/A
Tup.423	chrVI	148430	148770	340		0.213421	0.465747	-0.600615	-0.890274		Intergenic	3				271.973	-0.61486	0.0056399		300.12	-1.66292	3.28569e-09		367.554	0.319341	0.976807		193.856	-0.605045	0.0365001			YFL001W	276.564	-0.208223	-0.59076	0.115735	-0.266802		YFR001W	280.841	-0.0391082	-0.255541	0.214026	-0.00240637
Tup.424	chrVI	176510	177080	570		-0.0753324	-0.000330005	1.44172	1.65775		Intergenic	5				1278.03	1.82881	2.53997e-19		1414.01	1.61873	1.07245e-14		591.59	0.147903	0.99407		2233.83	0.0789213	0.68797			YFR015C	806.63	1.66879	2.19692	-0.229219	0.298918		YFR016C	936.963	0.014356	0.165176	-0.0192491	0.131571
Tup.425	chrVI	180860	181160	300		0.67409	0.617817	-0.09708	-0.192897		tRNA	8	tG(GCC)F2			303.942	-0.779366	1.515e-06		308.252	-1.10882	3.05521e-09		378.991	-0.0125476	0.99407		226.318	-0.2123	0.3176			YFR016C	936.963	0.014356	0.165176	-0.0192491	0.131571		tG(GCC)F	#N/A	#N/A	#N/A	#N/A	#N/A
Tup.426	chrVI	183210	183870	660		1.18649	1.04626	0.0719328	0.0848671		ORF	8	YFR018C			906.493	-1.05841	6.89899e-11		968.079	-1.37051	1.50741e-13		1231.85	0.0426563	0.99407		609.024	-0.145148	0.435562			YFR018C	636.508	0.657437	1.30882	-0.181125	0.470262		0	#N/A	#N/A	#N/A	#N/A	#N/A
Tup.427	chrVI	185900	186170	270		-0.264689	-0.445637	0.796252	-0.711815		ORF	7	FAB1			308.989	1.26233	2.09212e-07		159.788	-0.618354	0.0439226		177.819	-0.075212	0.99407		303.346	-1.80734	1.65277e-19			FAB1	903.718	-0.116472	-0.0225003	0.0747492	0.168721		0	#N/A	#N/A	#N/A	#N/A	#N/A
Tup.428	chrVI	210540	210820	280		0.744043	0.677207	-0.192893	-0.413789		tRNA	8	SUP6			304.269	-0.875181	0.00021747		288.327	-1.45043	1.32351e-11		383.496	-0.0436484	0.99407		199.58	-0.492801	0.0310556			YFR028C	787.301	-0.270952	-0.469662	0.0192788	-0.17943		tY(GUA)F	#N/A	#N/A	#N/A	#N/A	#N/A
Tup.429	chrVI	220540	221150	610		0.436242	0.332291	-0.734527	-0.84811		ORF	3	RPL2A			472.253	-1.14541	3.41981e-11		475.408	-1.59783	1.47772e-10		643.106	-0.0187383	0.99407		285.659	-0.340976	0.160409			RPL2A	8280.1	-0.245702	-0.426554	-0.0339668	-0.214819		0	#N/A	#N/A	#N/A	#N/A	#N/A
Tup.430	chrVI	223120	223850	730		0.653815	0.503636	-0.589313	-0.842371		ORF	3	RPL29			725.491	-1.15183	9.04991e-10		684.55	-1.77494	4.55027e-15		970.431	-0.0688702	0.99407		409.77	-0.562743	0.0136426			RPL29	936.899	-0.367738	-0.531397	0.288489	0.12483		0	#N/A	#N/A	#N/A	#N/A	#N/A
Tup.431	chrVI	224710	225560	850		1.13977	0.947395	0.64763	1.08116		ORF	1	PHO4	QCR6		1704.84	-0.311724	0.0834453		2024.9	-0.0441597	0.775478		1857.04	-0.0263666	0.99407		1897.84	0.375204	0.0111758			PHO4	256.905	-0.137976	-0.664634	-0.0914182	-0.618076		QCR6	1242.31	-0.106228	-0.0775684	-0.135699	-0.10704
Tup.432	chrVI	226190	226910	720		0.83584	0.700824	0.352039	0.650852		tRNA	1	YFR035C			987.347	-0.491395	0.00280959		1038.87	-0.530257	0.000774758		1121.58	-0.0583282	0.99407		901.954	0.0387144	0.825718			YFR035C	#N/A	#N/A	#N/A	#N/A	#N/A		tK(CUU)F	#N/A	#N/A	#N/A	#N/A	#N/A
Tup.433	chrVI	255240	256490	1250		0.947733	0.949426	3.00376	3.12957		Intergenic	6				8666.63	2.75694	3.81712e-51		8707.67	2.5316	4.02638e-45		2257.37	0.0540581	0.99407		16170.1	-0.0346964	0.849163			YFR053C	2189.9	1.60479	1.68712	-0.359936	-0.277597	3 peaks, 1 IG	YFR055W	814.049	-0.552676	-0.816859	-0.00304841	-0.267232
Tup.434	chrVI	260650	261810	1160		0.251687	0.262633	2.61631	2.99302		Intergenic	6				5023.94	3.0552	2.08361e-75		5655.76	2.9939	3.68001e-102		1102.98	0.0705265	0.99407		10268.6	0.152447	0.315118			YFR053C	2189.9	1.60479	1.68712	-0.359936	-0.277597	3 peaks, 1 IG	YFR055W	814.049	-0.552676	-0.816859	-0.00304841	-0.267232
Tup.435	chrVI	263220	263820	600		0.0940475	0.0966337	0.890369	0.995226		Intergenic	7				777.337	0.868866	4.204e-05		778.474	0.514026	0.00348863		561.796	0.0645264	0.99407		1038.94	-0.153857	0.44003			YFR053C	2189.9	1.60479	1.68712	-0.359936	-0.277597	3 peaks, 1 IG	YFR055W	814.049	-0.552676	-0.816859	-0.00304841	-0.267232
Tup.436	chrVII	6860	7350	490		-1.64944	-1.58021	0.293821	1.18673		Intergenic	7	YGL260W			359.284	2.14916	6.23089e-35		563.61	2.56879	1.20694e-33		139.06	0.146182	0.99407		837.81	0.706213	0.000147893			YGL260W	#N/A	#N/A	#N/A	#N/A	#N/A	2 peaks, 1 IG	YGL259W	6.71858	0.918491	1.41814	-0.0310882	0.468561
Tup.437	chrVII	7890	8430	540		-2.42096	-2.30858	0.170799	1.13571		Intergenic	7				296.918	2.51626	1.48102e-22		508.613	3.0432	5.184e-22		94.3118	0.151769	0.99407		761.846	0.825576	4.83556e-07			YGL260W	#N/A	#N/A	#N/A	#N/A	#N/A	2 peaks, 1 IG	YGL259W	6.71858	0.918491	1.41814	-0.0310882	0.468561
Tup.438	chrVII	20060	20790	730		0.671267	0.734825	2.48792	2.38972		ORF	6	ZRT1			3622.13	2.42971	1.82021e-51		2885.44	1.65779	2.4182e-26		1183.8	0.145813	0.99407		5680.73	-0.493299	0.00325918			ZRT1	1502.3	2.00332	1.53735	0.173034	-0.292936		0	#N/A	#N/A	#N/A	#N/A	#N/A
Tup.439	chrVII	23100	24310	1210		0.479227	0.321251	0.882937	1.12311		ORF	1	FZF1	HXK2		2238.75	1.13013	3.96675e-15		2423.54	0.98984	2.37148e-13		1426.06	0.0552016	0.99407		3404.31	0.0543515	0.749639			FZF1	175.177	-0.420258	-0.806021	-0.00334357	-0.389106		HXK2	12605	-0.206241	0.226856	-0.140099	0.292997
Tup.440	chrVII	73770	74060	290		0.57431	0.457645	-0.5431	-0.740014		tRNA	3	tV(AAC)G3			247.782	-1.10467	1.2055e-11		254.983	-1.65527	4.52202e-14		340.906	0.0474963	0.99407		151.394	-0.37845	0.129063			tV(AAC)G	#N/A	#N/A	#N/A	#N/A	#N/A		YGL225W	3032.46	0.11824	0.0946156	-0.256798	-0.280422
Tup.441	chrVII	94470	96060	1590		1.0268	0.88063	1.40714	1.67161		Intergenic	4				4197.83	1.02246	1.7881e-10		4285.79	0.893363	1.34559e-10		2715.95	-0.0322307	0.99407		6053.1	-0.0276736	0.869693			YGL210W	242.536	0.237452	-0.305283	0.313543	-0.229192		YGL209W	441.303	0.50131	0.312699	0.241873	0.0532618
Tup.442	chrVII	115410	115700	290		0.592276	0.504869	-0.246324	-0.474448		tRNA	8	tK(UUU)G1			287.556	-0.907664	1.82938e-05		277.414	-1.31225	6.75271e-15		362.471	-0.0700311	0.99407		194.15	-0.341026	0.116887			YGL203C	960.527	-0.187693	-0.367509	0.0590031	-0.120813		tK(UUU)G	#N/A	#N/A	#N/A	#N/A	#N/A
Tup.443	chrVII	122170	122450	280		0.669057	0.566186	-0.240261	-0.284121		tRNA	8	tK(CUU)G1			276.339	-0.973036	1.37653e-07		274.925	-1.19431	1.33692e-11		352.494	-0.0829931	0.99407		191.165	-0.17279	0.446811			YGL201C	896.218	-0.184942	-0.450183	-0.115737	-0.380978		tK(CUU)G	#N/A	#N/A	#N/A	#N/A	#N/A
Tup.444	chrVII	148200	148750	550		0.507191	0.43691	-0.68652	-1.04497		ORF	3	RPS26A			464.248	-1.13216	7.13434e-13		454.914	-1.86896	9.3715e-13		635.801	0.00951342	0.99407		262.485	-0.600052	0.0157249			RPS26A	6379.42	-0.266241	-0.370815	0.12564	0.0210658		0	#N/A	#N/A	#N/A	#N/A	#N/A
Tup.445	chrVII	156230	156660	430		1.23554	1.20496	0.315631	0.449981		Intergenic	1	MND1	STR3		743.833	-0.86705	8.01232e-06		779.014	-0.989177	6.94797e-05		939.786	-0.0345112	0.99407		566.109	-0.0301886	0.867218			YGL184C	160.976	-0.778669	0.416826	0.224499	1.41999		YGL183C	5.50181	0.0740649	0.238066	0.313484	0.477486
Tup.446	chrVII	158830	159500	670		-0.318446	-0.258611	-0.38034	1.61881		Intergenic	7	GTS1			463.466	-0.0628758	0.828803		1156.87	1.67606	1.59527e-10		483.75	0.0583858	0.99407		1192.84	1.93884	1.37947e-27			YGL181W	388.627	-0.094409	-0.401282	0.0848108	-0.222062		YGL180W	364.316	0.470186	0.896225	-0.0984934	0.327546
Tup.447	chrVII	166010	166730	720		0.207615	0.245974	0.232796	0.80321		Intergenic	7				835.349	0.191293	0.226907		1034.78	0.180732	0.255274		822.794	0.15879	0.99407		1073.83	0.286194	0.0614686			YGL179C	164.865	1.22316	0.644611	0.212183	-0.36637		YGL178W	1271.03	0.351882	0.633654	0.266265	0.548036
Tup.448	chrVII	196500	198060	1560		0.403976	0.449629	2.73497	3.24075		Intergenic	6				9126.67	2.98207	1.8906e-99		10144	2.78011	9.98646e-94		2173.31	0.178899	0.99407		18326.2	0.116863	0.487188			YGL163C	361.721	-0.0354368	0.121923	-0.151088	0.00627184		YGL162W	200.25	0.848224	1.10268	0.191566	0.446025
Tup.449	chrVII	205370	207330	1960		1.65083	1.60985	2.78809	2.8599		tRNA	2	RCK1			18382.8	1.72651	3.67233e-11		17174.4	1.49493	2.93943e-10		8245.94	-0.064389	0.99407		28921.5	-0.16571	0.346505			tL(CAA)G	#N/A	#N/A	#N/A	#N/A	#N/A		YGL158W	239.522	5.02126	5.01398	-0.0720465	-0.0793247
Tup.450	chrVII	208490	208920	430		0.139485	0.0566732	-0.0839862	0.169433		Intergenic	8	RCK1			442.405	0.0362232	0.841017		465.34	-0.248312	0.166781		444.163	0.0525392	0.99407		471.067	-0.0912501	0.602723			YGL158W	239.522	5.02126	5.01398	-0.0720465	-0.0793247		YGL157W	880.86	1.10818	1.54132	0.0908637	0.524006
Tup.451	chrVII	227650	228210	560		0.489265	0.50121	-0.663196	-0.975933		ORF	3	RPL9A			440.813	-1.13995	2.8114e-09		425.875	-1.81249	2.1384e-12		597.615	-0.0269226	0.99407		250.031	-0.567541	0.0269455			RPL9A	2993.72	-0.454292	-0.67134	-0.122649	-0.339698		0	#N/A	#N/A	#N/A	#N/A	#N/A
Tup.452	chrVII	254230	255440	1210		0.657161	0.611384	-0.487135	-0.688901		Intergenic	3	RPL1B			1104.9	-1.11206	1.32996e-12		1132.44	-1.54596	1.66665e-19		1504.78	0.00899051	0.99407		688.799	-0.294243	0.108105			YGL136C	123.154	-0.0780872	-0.396852	0.0601933	-0.258571		YGL135W	5620.28	-0.130112	-0.116804	-0.166846	-0.153538
Tup.453	chrVII	271350	272270	920		0.283844	0.217194	-0.0824623	0.0238586		ORF	8	SCS3			881.713	-0.358099	0.0435231		976.161	-0.666174	5.02133e-05		1029.44	0.118391	0.99407		824.598	-0.0561524	0.765462			SCS3	605.324	0.38796	0.351378	-0.0396616	-0.0762434		0	#N/A	#N/A	#N/A	#N/A	#N/A
Tup.454	chrVII	277570	278620	1050		0.706499	0.538721	-0.586057	-0.841389		ORF	3	RPS2			963.871	-1.30095	1.69367e-13		908.67	-1.775	4.66202e-17		1310.07	-0.11139	0.99407		521.598	-0.458445	0.0306283			RPS2	17236.3	-0.284403	-0.251192	-0.256542	-0.223331		0	#N/A	#N/A	#N/A	#N/A	#N/A
Tup.455	chrVII	287220	287570	350		0.718717	0.538251	-0.243151	-0.21312		tRNA	8	tW(CCA)G1			382.402	-0.86522	9.82232e-08		387.6	-1.17279	2.1384e-12		484.835	-0.0299027	0.99407		275.148	-0.205952	0.312578			YGL119W	301.864	-0.343356	-0.218237	-0.073926	0.0511931		tW(CCA)G	#N/A	#N/A	#N/A	#N/A	#N/A
Tup.456	chrVII	310710	312260	1550		0.859723	0.863799	-0.448613	-0.460062		ORF	8	RPL28			1647.55	-1.28593	1.27277e-12		1642.91	-1.68568	3.10321e-25		2281.53	-0.0481978	0.99407		936.969	-0.315895	0.0830337			RPL28	6390.74	-0.323088	-0.350028	-0.14066	-0.1676		0	#N/A	#N/A	#N/A	#N/A	#N/A
Tup.457	chrVII	319660	319990	330		0.768588	0.626779	-0.331297	-0.0558061		tRNA	8	tH(GUG)G2			375.871	-0.969082	1.47765e-05		394.491	-0.866229	3.18685e-08		473.987	-0.113205	0.99407		287.977	0.124213	0.54806			YGL098W	175.287	-0.0696877	0.0447024	0.118683	0.233073		tH(GUG)G	#N/A	#N/A	#N/A	#N/A	#N/A
Tup.458	chrVII	323260	325430	2170		2.65649	2.43152	3.46342	3.66111		Intergenic	2				30847	0.954706	0.000782051		30545.4	0.983389	0.000427094		19557.7	-0.171147	0.99407		43876.2	-0.0161621	0.926424			YGL097W	823.891	-0.274479	-0.587568	-0.0389946	-0.352084		YGL096W	60.4567	2.02549	1.35028	0.116026	-0.559183
Tup.459	chrVII	328450	328950	500		1.39761	1.2557	0.792788	0.458651		tRNA	1	VPS45			1013.82	-0.527458	0.032014		922.508	-1.0573	4.64894e-07		1150.15	-0.0845459	0.99407		771.256	-0.483203	0.00518142			YGL096W	60.4567	2.02549	1.35028	0.116026	-0.559183		tE(UUC)G	#N/A	#N/A	#N/A	#N/A	#N/A
Tup.460	chrVII	345410	346570	1160		0.256817	0.508746	-0.783449	0.27197		snRNA	8	MMS2	SNR10		890.08	-1.08602	4.9087e-09		1471.05	-0.588389	3.21352e-05		1391.82	0.395985	1.33977e-05		942.201	1.02937	1.88039e-08			YGL089C	2440.32	-0.204337	1.26933	9.3523	10.826		snR10	1267.77	0.102136	-0.00689691	0.780731	0.671698
Tup.461	chrVII	364710	366010	1300		0.484227	0.382071	-0.644222	-1.00515		snRNA	3	RPL7A			1016.84	-1.04805	7.7272e-09		980.564	-1.74217	2.18566e-16		1356.47	-0.0132575	0.99407		600.973	-0.57658	0.00690688			snR39	97.8803	-0.310461	-0.490592	-0.190401	-0.370532	2 peaks, 1 IG	snR39B	145.047	0.41039	-0.0669416	0.592955	0.115623
Tup.462	chrVII	366120	366670	550		0.627892	0.496453	-0.681525	-0.639997		snRNA	3				514.476	-1.23021	9.16058e-13		518.576	-1.60051	8.01548e-14		707.485	-0.0361315	0.99407		304.461	-0.279237	0.223995			snR39	97.8803	-0.310461	-0.490592	-0.190401	-0.370532	2 peaks, 1 IG	snR39B	145.047	0.41039	-0.0669416	0.592955	0.115623
Tup.463	chrVII	370930	371520	590		0.442291	0.692472	-0.302196	-0.677979		Intergenic	3	HSF1			631.243	-0.781288	1.07189e-07		689.137	-1.90105	2.30579e-23		883.089	0.297695	0.0699533		408.654	-0.69808	0.000396258			YGL073W	536.306	0.052137	-0.0983511	0.0933106	-0.0571776		YGL071W	480.416	-0.0801284	-0.480669	0.144196	-0.256344
Tup.464	chrVII	383680	385100	1420		0.735457	0.706908	2.50144	2.9479		ORF	6	PUS2			7036.15	2.03526	1.32878e-27		8364.06	2.16195	8.69283e-42		2734.23	0.000902991	0.996807		13489.4	0.25949	0.0750195			PUS2	312.818	0.167056	0.141249	-0.0974962	-0.123304		0	#N/A	#N/A	#N/A	#N/A	#N/A
Tup.465	chrVII	397800	398780	980		1.69321	1.45095	1.36783	0.975129		Intergenic	1	OLE1			3815.54	-0.2677	0.255318		2953.83	-0.82846	0.000438658		3754.2	-0.284314	0.99407		3021.5	-0.721602	1.15985e-06			YGL056C	477.056	0.168748	-0.038961	0.223466	0.0157562		YGL055W	9053.23	-0.101118	-0.0914736	-0.135383	-0.125738
Tup.466	chrVII	401440	401710	270		0.735567	0.570244	-0.131511	-0.0916296		tRNA	8	tE(UUC)G2			317.902	-0.941808	3.49171e-09		312.59	-1.13053	2.03638e-09		399.295	-0.108341	0.99407		223.612	-0.170116	0.437414			YGL054C	812.896	-0.173211	-0.155522	-0.0325321	-0.0148433		tE(UUC)G	#N/A	#N/A	#N/A	#N/A	#N/A
Tup.467	chrVII	405370	405640	270		0.683793	0.380981	-0.554278	-0.352956		tRNA	3	tR(UCU)G1			260.915	-1.10965	2.6888e-09		265.924	-1.20162	3.77543e-10		342.248	-0.0973057	0.99407		176.156	-0.0576135	0.81285			YGL051W	7.38187	-0.418624	0.791704	0.0455938	1.25592		tR(UCU)G	#N/A	#N/A	#N/A	#N/A	#N/A
Tup.468	chrVII	412180	412520	340		0.729859	0.591576	-0.217191	-0.156079		tRNA	8	tV(AAC)G1			384.004	-0.921171	3.07449e-08		381.497	-1.08954	1.41942e-09		481.4	-0.100281	0.99407		275.044	-0.139696	0.498315			YGL047W	132.032	0.110311	0.678797	-0.152179	0.416307		tV(AAC)G	#N/A	#N/A	#N/A	#N/A	#N/A
Tup.469	chrVII	412950	413830	880		1.26807	1.25785	1.80662	2.35941		Intergenic	4				3698.68	0.261777	0.280592		4539.55	0.600246	0.0165825		3279.77	-0.0402837	0.99407		5135.28	0.42364	0.00728749			tV(AAC)G	#N/A	#N/A	#N/A	#N/A	#N/A		YGL045W	237.248	1.51533	1.61322	-0.0497975	0.0480965
Tup.470	chrVII	422970	423700	730		0.493809	0.513504	0.331621	0.335507		tRNA	8				947.068	-0.295691	0.0372841		1002.14	-0.576707	3.10057e-06		1054.74	0.0522725	0.99407		893.825	-0.0967077	0.537052			tL(CAA)G	#N/A	#N/A	#N/A	#N/A	#N/A		YGL039W	296.602	0.0641431	0.0764011	-0.0696577	-0.0573997
Tup.471	chrVII	426930	427250	320		0.206141	0.374378	-0.0226	0.172325		Intergenic	8	PNC1			325.869	-0.222781	0.220107		388.324	-0.583014	0.000845485		383.512	0.252145	0.99407		329.584	0.0304301	0.877581			YGL038C	553.98	0.31446	0.529286	-0.129196	0.0856296		YGL037C	1049.53	1.16429	1.74945	0.0025463	0.587706
Tup.472	chrVII	433210	434030	820		0.189103	0.111193	0.639944	0.848479		Intergenic	7				1212.99	0.69639	1.42293e-05		1291.91	0.454358	0.0123255		949.513	0.0781312	0.99407		1616.88	-0.0246969	0.877581			YGL035C	581.043	0.407628	0.111838	-0.0195944	-0.315384		YGL033W	3.79576	0.355069	0.600854	-0.117943	0.127843
Tup.473	chrVII	436880	437360	480		0.530055	0.537694	-0.00981499	0.431744		Intergenic	8	AGA2			611.836	-0.51259	0.00208829		665.488	-0.044477	0.786368		659.087	-0.242577	0.377558		626.176	0.366294	0.0435884			YGL032C	356.71	0.165736	7.5831	-4.88733	2.53003		YGL031C	3664.29	-0.296429	-0.479539	0.0603506	-0.122759
Tup.474	chrVII	437480	437730	250		0.209772	0.40874	-0.717716	-1.01977		ORF	3	RPL24A			192.169	-0.971549	1.2408e-07		197.526	-1.64557	3.18032e-12		260.521	0.078338	0.99407		121.753	-0.462274	0.0842608			RPL24A	3664.29	-0.296429	-0.479539	0.0603506	-0.122759		0	#N/A	#N/A	#N/A	#N/A	#N/A
Tup.475	chrVII	439040	439820	780		0.639547	0.609656	-0.542697	-0.926335		ORF	3	RPL30			742.556	-1.2235	2.74516e-11		716.537	-1.85209	4.56733e-16		1018.57	-0.0375642	0.99407		407.906	-0.541584	0.0187102			RPL30	3266.22	-0.299302	-0.16595	-0.390224	-0.256873		0	#N/A	#N/A	#N/A	#N/A	#N/A
Tup.476	chrVII	440600	440910	310		0.681368	0.50921	-0.388335	-0.630765		tRNA	3	tF(GAA)G			312.185	-1.03815	8.87984e-09		278.405	-1.49013	1.42047e-16		391.731	-0.180512	0.99407		189.719	-0.501858	0.0239561			YGL029W	116.857	-0.214796	-0.85153	0.266553	-0.370181		tF(GAA)G	#N/A	#N/A	#N/A	#N/A	#N/A
Tup.477	chrVII	443280	443940	660		1.11157	0.96982	0.296661	0.133165		Intergenic	8	CWH41			1025.82	-0.712393	0.000109488		959.055	-1.03572	3.98154e-13		1207.46	-0.128624	0.99407		760.037	-0.322713	0.0346002			YGL028C	1934.37	0.469386	0.460507	0.147491	0.138612		YGL027C	1306.47	-0.302199	-0.492152	-0.109393	-0.299346
Tup.478	chrVII	472440	472780	340		0.267118	0.392097	0.506497	0.567979		Intergenic	7				466.57	0.22232	0.239826		486.336	-0.258098	0.0927918		452.007	0.142826	0.99407		509.856	-0.196266	0.251492			YGL013C	662.554	-0.235755	-0.235807	0.00136466	0.00131281		YGL012W	2791.34	0.179695	0.353991	-0.232569	-0.0582742
Tup.479	chrVII	479840	482950	3110		0.628583	0.463707	-0.347843	-0.764303		ORF	3	PMA1			3202.89	-1.06046	3.93991e-10		2886.51	-1.7103	1.40181e-16		4127.1	-0.118756	0.99407		1846.72	-0.639182	0.000486668			PMA1	119386	0.00114855	0.00905135	-0.229463	-0.22156		0	#N/A	#N/A	#N/A	#N/A	#N/A
Tup.480	chrVII	483140	484860	1720		1.36031	1.30052	2.22269	2.62908		Intergenic	4				9401.69	0.670813	0.00286764		10052.1	0.788051	0.00037036		6892.7	-0.119975	0.99407		13129	0.125776	0.467808			YGL007C-A	10.0807	0.0689734	0.946413	-0.649761	0.227679	2 peaks, 1 IG	YGL006W-A	26.2792	0.453101	0.302761	0.0179496	-0.13239
Tup.481	chrVII	485170	485460	290		-0.317959	-0.202186	0.646062	0.573317		Intergenic	7				390.339	1.12059	3.86605e-05		351.793	0.422791	0.103741		258.073	0.125063	0.99407		506.797	-0.426077	0.0179805			YGL007C-A	10.0807	0.0689734	0.946413	-0.649761	0.227679	2 peaks, 1 IG	YGL006W-A	26.2792	0.453101	0.302761	0.0179496	-0.13239
Tup.482	chrVII	496810	497100	290		0.289572	0.446355	-0.661566	-1.07973		Intergenic	3				244.13	-0.950938	0.000416336		253.236	-2.0185	3.13189e-13		341.926	0.1823	0.99407		143.972	-0.755637	0.0152251			YGL001C	728.072	-0.586527	-0.332925	-0.00934811	0.244254		YGR001C	311.513	-0.208264	-0.403325	0.0082597	-0.186802
Tup.483	chrVII	516170	516670	500		1.07414	0.855003	0.278111	1.25065		Intergenic	1	SNU71			918.539	-0.709264	8.60605e-06		1174.39	0.0745107	0.667715		1076.93	-0.141069	0.99407		1028.09	0.774993	1.30802e-06			YGR013W	357.026	-0.0549137	0.00850704	0.0840825	0.147503		YGR014W	4697.9	0.55191	0.712267	0.0444445	0.204802
Tup.484	chrVII	528550	528970	420		0.608879	0.508136	0.489449	0.672592		Intergenic	1				627.647	0.107621	0.5283		663.442	-0.0233995	0.872644		599.713	-0.00401691	0.99407		708.312	-0.00373615	0.985873			YGR021W	163.977	0.239285	0.183839	0.0659362	0.0104898		YGR023W	71.7336	1.76304	1.90777	0.162083	0.306819
Tup.485	chrVII	535970	536530	560		0.339418	0.322273	0.14603	0.748191		Intergenic	7				850.009	-0.265485	0.0396347		1064.35	-0.00888928	0.958522		939.454	0.0468823	0.99407		988.806	0.440946	0.00291465			YGR027C	4809.23	0.0267209	-0.378031	0.176447	-0.228305	2 peaks, 1 IG	tE(UUC)G	#N/A	#N/A	#N/A	#N/A	#N/A
Tup.486	chrVII	541750	542000	250		0.604812	0.52236	-0.482004	-0.553584		tRNA	3	tE(UUC)G3			245.711	-1.08235	1.14245e-09		237.883	-1.42773	6.37582e-13		320.533	-0.093382	0.99407		154.81	-0.309317	0.19845			YGR027C	4809.23	0.0267209	-0.378031	0.176447	-0.228305	2 peaks, 1 IG	tE(UUC)G	#N/A	#N/A	#N/A	#N/A	#N/A
Tup.487	chrVII	544530	544810	280		0.534118	0.447689	-0.650389	-0.419843		tRNA	3	tD(GUC)G2			254.857	-1.05477	4.36652e-08		265.896	-1.28774	7.6221e-14		339.141	-0.0155617	0.99407		173.094	-0.117408	0.614865			tD(GUC)G	#N/A	#N/A	#N/A	#N/A	#N/A		snR46	155.252	-0.370281	0.00562297	-0.281213	0.0946916
Tup.488	chrVII	546340	546790	450		-0.344236	-0.303166	0.636687	1.58504		ORF	7	YGR031W			483.993	1.1639	4.5358e-07		779.818	1.74035	1.43734e-09		310.623	0.102532	0.99407		1008.53	0.82784	7.40427e-08			YGR031W	363.53	0.523581	0.25515	-0.1619	-0.430331		0	#N/A	#N/A	#N/A	#N/A	#N/A
Tup.489	chrVII	547170	547680	510		-0.179298	0.0272873	0.448116	0.826784		Intergenic	7	NAG1	YGR031W		585.606	0.660288	0.00107275		717.214	0.484944	0.0255232		494.343	0.237806	0.99407		838.625	0.205056	0.219936			YGR031C-A	#N/A	#N/A	#N/A	#N/A	#N/A		YGR032W	6339.13	1.86453	3.33122	-0.192394	1.27429
Tup.490	chrVII	556100	556500	400		0.374336	0.32429	-0.561184	-0.88093		ORF	3	RPL26B			316.591	-0.946945	1.01057e-07		302.157	-1.66837	2.51075e-10		412.691	-0.0126941	0.99407		194.614	-0.606068	0.0191692			RPL26B	4371.47	-0.160642	-0.356498	-0.106738	-0.302594		0	#N/A	#N/A	#N/A	#N/A	#N/A
Tup.491	chrVII	557380	558040	660		1.41573	1.26483	2.48753	2.73585		ORF	4	CAX4	YGR035W-A		3450.44	1.32555	1.28851e-09		3599.4	1.37992	2.2099e-12		1868.8	-0.122389	0.99407		5482.11	0.0626884	0.743503			CAX4	430.016	0.159218	0.259898	-0.0614611	0.0392181		YGR035W-A	#N/A	#N/A	#N/A	#N/A	#N/A
Tup.492	chrVII	561530	561810	280		0.5044	0.482054	-0.462343	-0.484739		tRNA	3	tS(AGA)G			304.143	-1.00402	3.02627e-07		317.433	-1.33602	6.2224e-15		404.341	0.0158222	0.99407		206.555	-0.182763	0.407218			YGR038W	542.89	0.0949429	0.0736971	-0.262722	-0.283967		tS(AGA)G	#N/A	#N/A	#N/A	#N/A	#N/A
Tup.493	chrVII	576510	577170	660		0.90217	0.73109	0.707435	1.0179		Intergenic	1	KSS1			1179.02	-0.042565	0.810321		1222.53	-0.0788698	0.565444		1155.06	-0.0779504	0.99407		1268.03	0.0189975	0.908029			YGR040W	371.458	-0.396962	0.0355625	-0.030566	0.401958		YGR041W	454.138	0.350878	-0.65501	0.10242	-0.903468
Tup.494	chrVII	590930	591230	300		0.473337	0.50088	-0.135373	-0.202263		Intergenic	8				364.72	-0.553728	0.00638386		346.199	-1.08949	1.20849e-05		426.718	-0.0334633	0.99407		279.344	-0.445918	0.0842608			YGR048W	212.772	0.169741	0.193869	-0.00894931	0.0151787		YGR049W	365.981	0.289415	-0.036429	0.246758	-0.079086
Tup.495	chrVII	591440	593390	1950		1.21092	1.16298	1.83942	1.99717		Intergenic	4	SCM4			13400	1.29213	1.84662e-07		12974.5	1.19146	3.99464e-07		7383.15	-0.118001	0.99407		20031.8	-0.088551	0.590262			YGR049W	365.981	0.289415	-0.036429	0.246758	-0.079086		YGR052W	84.998	3.60077	3.40715	0.100407	-0.0932137
Tup.496	chrVII	598830	599330	500		0.366227	0.401963	0.377844	0.424252		Intergenic	8				722.843	0.112349	0.527932		703.715	-0.529737	0.000100243		717.876	0.108223	0.99407		717.892	-0.405012	0.0245913			YGR054W	3286.93	0.00233744	-0.141553	0.0216863	-0.122204		YGR055W	3394.27	-0.547026	-0.141328	-0.29723	0.108468
Tup.497	chrVII	609290	611270	1980		0.987941	0.93053	0.233053	0.269177		snRNA	8	ERG25			4042.63	-0.53851	0.00834319		4016.64	-0.741908	7.32755e-05		4621.12	-0.0738573	0.99407		3406.86	-0.151944	0.301671			snR48	33.2991	-0.0797752	-0.0172325	-0.0399202	0.0226226		YGR060W	8679.95	-0.0367895	0.203198	-0.249836	-0.00984863
Tup.498	chrVII	624840	625920	1080		1.94591	1.70503	2.56809	2.87395		ORF	2	ART5			8398.08	0.997092	0.000144783		7571.82	0.763975	0.00409591		5284.16	-0.137594	0.99407		11206.1	-0.245216	0.133078			ART5	247.004	-0.00924138	0.232666	-0.0921787	0.149729		0	#N/A	#N/A	#N/A	#N/A	#N/A
Tup.499	chrVII	640470	640740	270		0.523611	0.4514	-0.320707	0.101596		Intergenic	8				319.454	-0.558309	0.000191637		359.266	-0.641065	0.00184494		385.019	0.0516651	0.99407		290.566	0.0986649	0.658355			YGR078C	412.801	-0.051562	-0.267138	0.128749	-0.086827		YGR079W	531.793	0.319884	-0.381941	0.477378	-0.224448
Tup.500	chrVII	648230	649220	990		0.429092	0.203826	-0.724476	-0.987167		Intergenic	3	RPL11B			843.845	-1.09373	1.35985e-11		830.418	-1.64048	8.98954e-14		1133.88	-0.0243736	0.99407		508.083	-0.440838	0.0363455			YGR085C	2402.92	-0.222974	-0.443682	0.141944	-0.0787643		YGR086C	5306.75	0.911803	0.402582	-0.0069768	-0.516198
Tup.501	chrVII	650750	651600	850		1.38142	1.14013	1.51022	1.9125		Intergenic	4	PDC6			2783.74	0.318311	0.160127		3034.37	0.512394	0.0168449		2345.79	-0.12991	0.99407		3602.84	0.189916	0.28722			YGR086C	5306.75	0.911803	0.402582	-0.0069768	-0.516198		YGR087C	42.3085	2.94276	3.08569	0.46669	0.609616
Tup.502	chrVII	653930	654460	530		0.189992	0.167457	1.04435	1.37621		Intergenic	5				884.94	1.32977	7.27703e-12		1098.21	1.18571	1.4747e-13		552.108	0.256137	0.99407		1507.19	0.251861	0.136132			YGR087C	42.3085	2.94276	3.08569	0.46669	0.609616		YGR088W	369.26	3.96011	3.07745	0.206934	-0.675726
Tup.503	chrVII	676960	678410	1450		0.865787	0.722581	1.57624	1.58207		Intergenic	4	TPC1			4295.25	0.68548	0.000167646		3892.49	0.363624	0.0574167		3155.17	-0.0967428	0.99407		5237.21	-0.288772	0.0614686			YGR096W	125.396	0.0570818	0.404874	-0.257551	0.0902415		YGR097W	1763.83	1.03613	1.19597	0.143589	0.303423
Tup.504	chrVII	682050	682640	590		0.372463	0.115272	2.3527	0.694944		Intergenic	5	ASK10	ESP1		2165.97	2.38337	3.90371e-23		735.835	0.447832	0.0083467		625.15	-0.318143	0.99407		2423.98	-2.10922	3.7671e-32			YGR097W	1763.83	1.03613	1.19597	0.143589	0.303423		YGR098C	871.435	-0.0278907	-0.0732369	0.0167915	-0.0285546
Tup.505	chrVII	700500	701090	590		0.827211	0.675156	-0.116113	-0.16082		tRNA	8				742.761	-0.889026	1.97953e-07		716.579	-1.20662	4.77111e-13		925.509	-0.0948141	0.99407		515.021	-0.282568	0.101747			YGR106C	2609.23	0.11391	0.0604698	-0.045009	-0.098449		tL(GAG)G	#N/A	#N/A	#N/A	#N/A	#N/A
Tup.506	chrVII	701430	702490	1060		0.39976	0.277282	1.83333	2.01183		Intergenic	5				3740.24	2.27015	5.3197e-69		3656.59	2.01873	4.98263e-55		1286.29	0.0196378	0.99407		6515.94	-0.0931867	0.537996			tK(UUU)G	#N/A	#N/A	#N/A	#N/A	#N/A	2 peaks, 1 IG	YGR108W	698.706	0.462852	0.181587	-0.0293394	-0.310605
Tup.507	chrVII	702520	703510	990		2.30736	2.24243	2.67666	2.91091		Intergenic	2				11219.5	0.267243	0.369391		11161.4	0.0148372	0.962252		10003.6	-0.0140657	0.99407		12676	-0.139758	0.416331			tK(UUU)G	#N/A	#N/A	#N/A	#N/A	#N/A	2 peaks, 1 IG	YGR108W	698.706	0.462852	0.181587	-0.0293394	-0.310605
Tup.508	chrVII	706830	707080	250		0.231776	0.266448	-0.5221	-0.113796		Intergenic	8				212.464	-0.69599	9.22657e-05		254.301	-0.54999	0.0034349		265.516	0.0483837	0.99407		198.707	0.326884	0.131304			YGR109C	78.2561	-0.0591689	-0.0773391	0.411126	0.392956		tC(GCA)G	#N/A	#N/A	#N/A	#N/A	#N/A
Tup.509	chrVII	708860	709160	300		-0.228047	-0.240057	-0.120313	0.55519		Intergenic	7				279.576	0.238861	0.291274		446.171	0.835082	0.00242988		271.899	0.159906	0.99407		471.019	0.899428	7.29634e-08			tC(GCA)G	#N/A	#N/A	#N/A	#N/A	#N/A	2 peaks, 1 IG	YGR110W	99.3607	0.962585	1.27601	-0.269326	0.0440951
Tup.510	chrVII	713020	713340	320		0.748444	0.372972	0.0664156	-0.997553		Intergenic	3				417.132	-0.586586	0.000616137		282.84	-1.60431	1.49746e-11		438.708	-0.384929	0.240387		256.556	-1.27996	3.18215e-09			tC(GCA)G	#N/A	#N/A	#N/A	#N/A	#N/A	2 peaks, 1 IG	YGR110W	99.3607	0.962585	1.27601	-0.269326	0.0440951
Tup.511	chrVII	727100	727730	630		0.434809	0.309656	-0.803997	-1.0652		ORF	3	RPS23A			479.436	-1.19554	5.95582e-11		464.511	-1.80225	6.12157e-13		654.79	-0.041664	0.99407		268.522	-0.516116	0.0307187			RPS23A	2881.52	-0.35496	-0.479239	0.0150155	-0.109263		0	#N/A	#N/A	#N/A	#N/A	#N/A
Tup.512	chrVII	733130	734120	990		-0.377514	-0.323946	1.04308	2.01199		ORF	5	YGR121W-A	YGR122W		1531.66	1.80648	5.33491e-11		2719.18	2.39824	4.69467e-14		729.232	0.181764	0.99407		3759.16	0.926225	7.29634e-08			YGR121W-A	9.8919	-0.274163	-0.697243	0.190115	-0.232965		YGR122W	131.393	-0.275903	-0.635744	0.0652	-0.294641
Tup.513	chrVII	739000	740010	1010		0.554723	0.397856	0.678787	1.75591		tRNA	5				1368.71	0.475069	0.000230836		2531.82	1.57902	5.87519e-22		1136.9	-0.00319858	0.99407		2909.05	1.24033	1.33316e-15			tI(AAU)G	15.8369	0.156362	0.264044	-0.373717	-0.266035		YGR124W	7437.22	-0.0471865	0.191682	-0.0844443	0.154424
Tup.514	chrVII	754010	754480	470		-0.417905	-0.455505	-0.0459002	0.740403		Intergenic	7	FHN1			358.604	0.576213	0.0391771		504.572	0.855177	0.00786517		304.835	0.1561	0.99407		582.998	0.578187	0.00737303			YGR130C	1431.59	0.694692	0.533155	-0.120838	-0.282375		YGR131W	64.3046	0.490535	1.08677	-0.0494018	0.546829
Tup.515	chrVII	765820	767280	1460		1.79607	1.58392	3.64575	3.802		Intergenic	2				20512.7	0.991059	0.000336006		19786.7	0.92251	0.00143927		12907.3	-0.146074	0.99407		28742.7	-0.0882608	0.600618			YGR138C	1421.18	4.55579	5.06745	-0.0159541	0.495709		YGR140W	453.979	0.009459	-0.197609	0.0597318	-0.147336
Tup.516	chrVII	771950	772270	320		0.423413	0.411097	0.436475	0.355866		Intergenic	8	VPS62			457.734	0.215394	0.247439		421.386	-0.423108	0.00164063		427.238	0.0338627	0.99407		459.866	-0.465999	0.00785591			YGR141W	307.278	0.29727	0.11879	-0.0365227	-0.215003		YGR142W	194.873	0.285107	0.385781	0.0355705	0.136245
Tup.517	chrVII	774200	774780	580		1.03257	0.838116	0.550549	1.00164		tRNA	1				977.762	-0.340013	0.0776784		1116.37	-0.166175	0.317217		1069.45	-0.0345412	0.99407		1034.18	0.272337	0.0725081			YGR142W	194.873	0.285107	0.385781	0.0355705	0.136245		tA(AGC)G	#N/A	#N/A	#N/A	#N/A	#N/A
Tup.518	chrVII	779510	779820	310		0.441652	0.431697	-0.136097	-0.282142		tRNA	8	SUF4			318.862	-0.745275	8.11993e-06		308.464	-1.07157	8.37097e-11		384.809	-0.0824645	0.99407		236.415	-0.279245	0.169363			YGR143W	1037.28	0.489438	0.62958	-0.0811038	0.0590386		tG(UCC)G	#N/A	#N/A	#N/A	#N/A	#N/A
Tup.519	chrVII	780440	780850	410		0.00145439	-0.0440074	1.04639	0.263767		ORF	7	THI4			659.687	1.39521	1.4938e-11		409.81	0.127795	0.523981		356.804	-0.049119	0.99407		747.211	-1.17344	4.58271e-12			THI4	89.5409	3.55115	4.03056	-0.00134308	0.478067		0	#N/A	#N/A	#N/A	#N/A	#N/A
Tup.520	chrVII	785360	786100	740		0.278331	0.433191	0.809099	0.875727		Intergenic	1	NAT2			1238.83	0.742889	3.12877e-05		1233.98	0.174085	0.159018		980.886	0.169336	0.99407		1546.35	-0.265358	0.121747			YGR146C-A	7.26803	0.0803903	-0.205866	0.152169	-0.134088		YGR147C	410.615	0.0260671	-0.335744	0.0171977	-0.344614
Tup.521	chrVII	787430	787730	300		0.406173	0.272103	-0.676717	-0.992943		ORF	3	RPL24B			236.228	-1.08263	3.39049e-08		229.807	-1.79537	2.18748e-14		318.921	-0.00109107	0.996447		137.454	-0.584297	0.0280064			RPL24B	3701.34	-0.216181	-0.601742	0.196736	-0.188824		0	#N/A	#N/A	#N/A	#N/A	#N/A
Tup.522	chrVII	788340	788610	270		0.435693	0.314248	-0.457593	0.14303		Intergenic	8				299.128	-0.586396	0.00556595		324.64	-0.708938	0.000464275		359.093	0.00982934	0.99407		261.704	0.0244172	0.919166			YGR148C	3701.34	-0.216181	-0.601742	0.196736	-0.188824		YGR149W	842.525	0.784627	1.46833	-0.0220225	0.661678
Tup.523	chrVII	794310	794580	270		0.693815	0.441896	-0.390922	-0.684656		tRNA	3	tA(UGC)G			267.894	-1.06817	1.14638e-08		247.782	-1.47757	3.96424e-17		342.873	-0.140315	0.99407		164.455	-0.417105	0.0776496			YGR150C	412.445	-0.233865	-0.382901	-0.126905	-0.275942		tA(UGC)G	#N/A	#N/A	#N/A	#N/A	#N/A
Tup.524	chrVII	809190	810160	970		0.883103	0.986568	1.98952	1.92834		Intergenic	4	RTS3			4141.6	1.774	9.81932e-25		3488.72	1.11601	8.33965e-12		1915.9	0.0855638	0.99407		6053.15	-0.439268	0.00832236			YGR161C	745.918	1.15005	2.08272	-0.0256541	0.907012		YGR161W-C	149.029	0.584166	1.08661	0.022359	0.524805
Tup.525	chrVII	810730	811080	350		-0.277137	-0.185189	1.06234	1.20515		Intergenic	7				559.422	1.73279	3.08079e-16		542.98	1.14274	7.92525e-06		281.394	0.224724	0.99407		868.004	-0.215093	0.200495			YGR161W-C	149.029	0.584166	1.08661	0.022359	0.524805	2 peaks, 1 IG	tV(AAC)G	#N/A	#N/A	#N/A	#N/A	#N/A
Tup.526	chrVII	811810	812060	250		-0.331356	-0.079388	-0.583904	-0.457224		Intergenic	3				179.125	-0.349398	0.268767		202.498	-0.584019	0.039837		209.011	0.114627	0.99407		172.329	0.0136096	0.968221			YGR161W-C	149.029	0.584166	1.08661	0.022359	0.524805	2 peaks, 1 IG	tV(AAC)G	#N/A	#N/A	#N/A	#N/A	#N/A
Tup.527	chrVII	828610	828910	300		0.71082	0.496453	-0.433433	-0.398927		tRNA	8	tR(UCU)G2			315.772	-1.03262	1.42788e-09		306.042	-1.33004	4.11608e-16		406.057	-0.103105	0.99407		206.342	-0.269567	0.205628			YGR163W	314.191	-0.0596183	-0.452699	0.154227	-0.238853		tR(UCU)G	#N/A	#N/A	#N/A	#N/A	#N/A
Tup.528	chrVII	842590	842920	330		-0.25827	-0.343782	0.90967	-0.633527		ORF	7	YIP1			441.379	1.40542	5.63025e-09		220.513	-0.63248	0.0329186		241.052	-0.0161836	0.99407		438.912	-1.90993	1.19025e-23			YIP1	614.266	-0.0665888	0.0576438	-0.299048	-0.174815		0	#N/A	#N/A	#N/A	#N/A	#N/A
Tup.529	chrVII	845540	845850	310		0.6804	0.595687	-0.352132	-0.397955		tRNA	8	CBP4	tG(GCC)G1		315.509	-1.06219	5.93665e-10		294.475	-1.35806	1.62937e-12		400.926	-0.155319	0.99407		199.885	-0.323547	0.128785			YGR173W	345.3	-0.279541	-0.449154	-0.00575293	-0.175365		tG(GCC)G	#N/A	#N/A	#N/A	#N/A	#N/A
Tup.530	chrVII	848520	849100	580		0.813353	0.874716	1.13449	1.88626		ORF	4	ATF2			1429.05	0.466355	0.00900953		1851.13	0.804211	1.34711e-06		1198.36	0.020721	0.99407		2171.14	0.489051	0.0062096			ATF2	441.098	0.236896	-0.357624	0.0151483	-0.579371		0	#N/A	#N/A	#N/A	#N/A	#N/A
Tup.531	chrVII	850540	850870	330		0.551518	0.454852	0.885624	1.0013		Intergenic	1				595.843	0.468774	0.00282418		613.091	0.165627	0.201681		507.103	0.058122	0.99407		725.096	-0.113809	0.54267			YGR177C	441.098	0.236896	-0.357624	0.0151483	-0.579371		YGR178C	2181.35	-0.109842	-0.197348	-0.0677073	-0.155214
Tup.532	chrVII	856430	857600	1170		1.06452	0.896636	1.1973	1.65579		tRNA	1				2905.76	0.651349	0.00038914		3506.69	0.802906	3.86589e-07		2264.18	0.0297237	0.99407		4328.25	0.313071	0.0625279			YGR180C	7531.23	1.98242	1.97487	0.324998	0.317442		tL(CAA)G	#N/A	#N/A	#N/A	#N/A	#N/A
Tup.533	chrVII	876290	876700	410		0.481461	0.347019	-0.138111	-0.602956		tRNA	3	CRH1			437.543	-0.511463	0.00737251		381.843	-1.18567	2.52776e-09		492.275	-0.102012	0.99407		320.554	-0.646166	0.00153649			YGR188C	191.743	-0.10199	-0.434692	0.127437	-0.205265		tK(CUU)G	#N/A	#N/A	#N/A	#N/A	#N/A
Tup.534	chrVII	877360	878940	1580		0.34558	0.287683	-0.497492	-0.174379		ORF	8	CRH1			1506.38	-0.773624	9.4923e-09		1837.81	-0.490909	1.00815e-05		1905.04	0.024171	0.99407		1423.75	0.442028	0.00241351			CRH1	10428.1	1.11916	1.54401	0.100754	0.5256		0	#N/A	#N/A	#N/A	#N/A	#N/A
Tup.535	chrVII	882450	884780	2330		0.829696	0.699683	0.69005	0.529549		Intergenic	1	TDH3			4061.5	0.21699	0.26709		3435.15	-0.492909	0.00033089		3662.14	-0.0526681	0.99407		3896.7	-0.628547	2.43958e-05			YGR192C	146247	0.0652017	0.39143	-0.374409	-0.0481817		YGR193C	520.669	-0.0829073	-0.0986215	0.0322709	0.0165567
Tup.536	chrVII	893680	894630	950		-0.539849	-0.341795	1.83508	3.27072		Intergenic	5	SNG1			2395.55	2.68879	1.27592e-22		5757.23	3.68703	1.83664e-29		693.525	0.200193	0.99407		8016.65	1.35074	4.52503e-16			YGR197C	188.55	-0.268817	0.248516	-0.378593	0.13874		YGR198W	631.912	-0.0126461	-0.166978	0.00366205	-0.15067
Tup.537	chrVII	905100	905760	660		-0.114858	-0.0980797	0.230412	0.836571		ORF	7	YCH1			727.344	0.392699	0.0462047		960.591	0.640887	0.00345866		649.954	0.0965062	0.99407		1077.89	0.48515	0.0062096			YCH1	180.893	0.338763	0.384023	0.0916702	0.13693		0	#N/A	#N/A	#N/A	#N/A	#N/A
Tup.538	chrVII	919410	920360	950		1.23106	1.13069	1.72566	1.88548		Intergenic	4				4073.14	0.884513	6.08401e-05		3643.5	0.534962	0.00617187		2750.69	-0.0897908	0.99407		5180.67	-0.305029	0.0512008			YGR213C	166.253	3.47051	4.51602	-0.299861	0.745646		YGR214W	11874.8	-0.148031	-0.35798	-0.0161659	-0.226114
Tup.539	chrVII	930890	931140	250		0.699744	0.526448	-0.227768	-0.321192		tRNA	8	tG(GCC)G2			259.578	-0.871441	9.77026e-06		241.143	-1.24945	3.27468e-12		318.191	-0.131469	0.99407		176.192	-0.375045	0.100286			YGR217W	1369.87	-0.109108	-0.0493416	-0.117453	-0.0576871		tG(GCC)G	#N/A	#N/A	#N/A	#N/A	#N/A
Tup.540	chrVII	939090	939680	590		0.534995	0.394219	-0.445127	0.168205		snRNA	8	SNR7-L	SNR7-S		536.287	-0.863208	1.44155e-06		664.98	-0.39664	0.00210655		681.686	-0.025401	0.99407		514.245	0.580521	0.000953264			YGR221C	151.879	0.255337	0.277099	0.144233	0.165994		snR7-L	22.352	-0.527403	-0.0355695	-0.532443	-0.040609
Tup.541	chrVII	951260	951900	640		1.32913	1.25394	1.86676	2.31027		Intergenic	4	BNS1			2577.13	0.875324	4.14582e-05		3161.09	0.939928	1.16695e-05		1869.54	0.109375	0.99407		4046.94	0.304103	0.0538214			YGR229C	1408.14	-0.186885	-0.380505	-0.0685647	-0.262186		YGR230W	75.5269	0.831853	0.702512	-0.0721302	-0.201472
Tup.542	chrVII	958560	961100	2540		0.813836	0.724048	0.483288	0.537861		Intergenic	1	YHB1			5199.85	0.102026	0.593692		5450.35	0.0850698	0.628041		4853.15	-0.0686704	0.99407		5940.78	0.0440166	0.76668			YGR233C	1532	-0.122729	-0.294072	0.0218586	-0.149484		YGR234W	8799.32	-0.62601	-0.801107	0.030121	-0.144976
Tup.543	chrVII	968690	969600	910		0.733155	0.679179	2.1091	2.14401		Intergenic	4	PEX21			4229.21	2.23515	5.26439e-39		3765.94	1.71656	5.09502e-24		1521.02	0.0993815	0.99407		6889.78	-0.28432	0.0762847			YGR238C	314.319	0.670569	0.321114	-0.0277349	-0.37719		YGR239C	99.9304	0.116628	0.425072	0.0855247	0.393969
Tup.544	chrVII	976770	977330	560		1.3014	1.27511	0.706704	0.86365		Intergenic	1	YAP1802			1305.58	-0.583418	0.0061256		1382.3	-0.577465	0.00948795		1516.12	-0.0628614	0.99407		1163.3	0.0706078	0.651801			YGR241C	588.863	0.596111	0.360157	0.195948	-0.0400056		YGR243W	104.615	2.75604	3.13699	-0.259172	0.121777
Tup.545	chrVII	977610	978130	520		0.210676	-0.0314628	0.962098	0.444031		Intergenic	7	FMP43	LSC2		665.161	0.874322	7.50162e-10		504.659	0.118299	0.531921		450.381	-0.113169	0.99407		748.671	-0.728848	6.57399e-07			YGR243W	104.615	2.75604	3.13699	-0.259172	0.121777		YGR244C	1146.69	1.1549	1.41473	-0.140965	0.118871
Tup.546	chrVII	985830	988220	2390		2.45335	2.25165	3.2455	2.86956		Intergenic	2	SOL4			43641.3	0.704335	0.0188754		37076.3	0.2781	0.334655		31408.5	-0.125025	0.99407		51127.2	-0.423184	0.00932244			YGR248W	64.1721	3.47818	2.96615	0.226934	-0.285098		YGR249W	97.141	2.77862	2.11645	0.418605	-0.243567
Tup.547	chrVII	989400	990740	1340		2.8507	2.65048	2.72976	2.5361		Intergenic	2	MGA1			17328.1	0.0795611	0.806726		14703.7	-0.326008	0.254518		15649.1	-0.181397	0.99407		16648.8	-0.458193	0.00800117			YGR249W	97.141	2.77862	2.11645	0.418605	-0.243567		YGR250C	859.243	0.584773	0.910206	0.147885	0.473319
Tup.548	chrVII	993810	994360	550		-0.0875624	0.0273545	0.676016	1.62739		Intergenic	5				674.745	0.9648	4.39678e-05		1130.29	1.591	2.13309e-13		481.066	0.140511	0.99407		1398.78	0.908984	1.99963e-07			YGR250C	859.243	0.584773	0.910206	0.147885	0.473319		YGR251W	145.216	0.00340346	-0.45253	0.181492	-0.274442
Tup.549	chrVII	999960	1000840	880		1.06172	1.05067	1.12852	2.17245		Intergenic	4				2387.99	-0.230875	0.32688		3425.56	0.548908	0.0019875		2520.85	-0.0345679	0.99407		3378.44	0.876431	1.18472e-09			YGR253C	672.894	-0.161796	-0.209425	-0.0117572	-0.059386		YGR254W	11495.8	0.967394	2.11522	-0.313944	0.833881
Tup.550	chrVII	1004120	1004370	250		0.637672	0.636156	-0.488916	-0.364956		tRNA	8	tT(UGU)G2			246.461	-1.04305	5.42078e-09		264.047	-1.35589	2.06179e-16		334.607	0.0444843	0.99407		167.158	-0.133551	0.57037			YGR255C	910.553	0.52682	0.845721	-0.103024	0.215876		tT(UGU)G	#N/A	#N/A	#N/A	#N/A	#N/A
Tup.551	chrVII	1050070	1051030	960		1.74094	1.4657	1.70166	1.98876		Intergenic	4	PXR1			4763.24	-0.0579888	0.828803		4694.64	0.169802	0.528257		4379.8	-0.276976	0.99407		5211.68	0.0750915	0.641798			YGR279C	8268.09	0.402341	0.459941	-0.15169	-0.0940902		YGR280C	142.375	0.257724	-0.442536	0.0577858	-0.642474
Tup.552	chrVII	1051890	1052460	570		0.320666	0.293213	0.0356411	0.320626		Intergenic	8				558.802	-0.228782	0.231196		619.117	-0.150057	0.37209		591.78	-0.04293	0.99407		594.61	0.167745	0.373011			YGR280C	142.375	0.257724	-0.442536	0.0577858	-0.642474		YGR281W	4232.14	0.64652	0.745407	-0.0859644	0.0129226
Tup.553	chrVII	1058120	1059100	980		0.200026	0.132552	-0.31727	-0.531151		Intergenic	3	BGL2			783.793	-0.327902	0.019373		797.15	-0.870852	1.4738e-05		894.794	0.0852609	0.99407		678.967	-0.324709	0.0622441			YGR282C	8602.36	0.300463	1.14609	-0.382724	0.462907		YGR283C	188.53	-0.186868	-0.50408	0.121337	-0.195874
Tup.554	chrVII	1065150	1065470	320		-0.112609	-0.0446094	0.997791	0.832537		Intergenic	7				486.829	1.36329	2.79767e-10		438.376	0.815406	0.000769888		278.874	0.0585258	0.99407		679.863	-0.345768	0.0290767			YGR286C	551.378	1.80624	1.99345	-0.0843113	0.102899		YGR287C	217.003	2.79577	2.93187	-0.0387971	0.097303
Tup.555	chrVII	1069060	1070230	1170		0.413956	0.538245	2.54611	2.81027		Intergenic	6				6743.44	2.92595	2.94745e-70		7125.58	2.70832	5.43769e-73		1624.72	0.121415	0.99407		13105.2	0.0407792	0.811851			YGR287C	217.003	2.79577	2.93187	-0.0387971	0.097303		YGR288W	184.663	0.902927	1.50676	-0.0904873	0.513349
Tup.556	chrVII	1072520	1073140	620		-0.0639266	-0.0298097	1.35228	1.69977		Intergenic	5				1166.07	1.69823	4.90358e-15		1435.44	1.88194	4.50519e-25		549.331	-0.00143394	0.996447		2180.33	0.327152	0.029345			YGR288W	184.663	0.902927	1.50676	-0.0904873	0.513349		YGR289C	179.123	1.1393	1.78793	-0.542384	0.106253
Tup.557	chrVII	1075980	1076550	570		1.00113	0.890829	2.14257	2.37843		Intergenic	4	MAL11			2056.26	1.79189	2.38223e-16		2120.5	1.64358	4.46567e-32		915.566	0.0116638	0.99407		3455.93	-0.00184309	0.991644			YGR289C	179.123	1.1393	1.78793	-0.542384	0.106253		YGR292W	167.429	5.05635	6.59474	-0.619479	0.918912
Tup.558	chrVII	1079530	1080690	1160		0.0457847	0.0216436	2.14872	2.41027		Intergenic	5	PAU12			4707.07	3.23794	1.93477e-75		5655.13	3.25795	6.99508e-74		928.662	0.0905539	0.99407		10117.7	0.255205	0.102557			YGR292W	167.429	5.05635	6.59474	-0.619479	0.918912		YGR294W	14.301	2.5236	2.79667	0.178296	0.451372
Tup.559	chrVII	1080770	1081630	860		0.63685	0.594679	3.17015	3.56809		Intergenic	6				6713.22	3.42254	2.97115e-114		8430.4	3.60006	1.63203e-237		1143.37	0.015055	0.99407		15036.9	0.330349	0.0285986			YGR294W	14.301	2.5236	2.79667	0.178296	0.451372		YGR295C	1154.82	0.266542	1.18579	-0.259969	0.659275
Tup.560	chrVIII	11420	13130	1710		-0.013731	-0.115872	1.40764	1.8277		Intergenic	5	PAU13			6611.65	3.08717	6.04825e-71		8922.39	3.37489	8.33697e-86		1396.54	0.0151386	0.99407		15174.2	0.446031	0.00223053			YHL046C	8.35943	1.63522	2.39715	-0.187953	0.573972		YHL044W	111.671	2.12636	2.24194	0.0623123	0.177892
Tup.561	chrVIII	16060	18710	2650		1.6292	1.52538	3.65396	3.76704		Intergenic	2	YHL042W			31882.5	1.99349	2.31679e-13		30420	1.91857	1.28204e-14		12022.4	-0.147767	0.99407		53485.5	-0.094203	0.584734			YHL042W	40.903	0.541454	0.796444	-0.0925167	0.162473		YHL040C	957.462	1.42897	1.60295	-0.276393	-0.10242
Tup.562	chrVIII	21080	21620	540		-0.231126	-0.0765118	1.01746	0.49616		Intergenic	7	ARN1			660.041	1.38688	7.80649e-06		558.778	0.202044	0.362944		415.334	0.349317	0.99407		837.053	-0.688784	0.00044353			YHL040C	957.462	1.42897	1.60295	-0.276393	-0.10242		YHL039W	625.73	-0.00525729	-0.0696344	-0.0259229	-0.0903
Tup.563	chrVIII	34320	36130	1810		1.13049	0.975016	0.175928	-0.0266391		Intergenic	8	RPL8A			2526.52	-0.935675	1.66856e-05		2320.85	-1.27781	8.24368e-15		3113.3	-0.157986	0.99407		1666.88	-0.368011	0.0196586			YHL034C	1852.77	0.0497176	-0.0613817	0.00138244	-0.109717		YHL033C	3283.24	-0.542883	-0.43159	-0.146513	-0.0352199
Tup.564	chrVIII	47010	47400	390		0.890382	0.400913	1.00216	-0.387021		ORF	8	OCA5			608.827	0.267517	0.219159		320.924	-1.17033	1.94455e-12		473.144	-0.468261	0.27721		468.105	-1.77449	1.64414e-24			OCA5	1192.34	0.274287	0.303144	0.207412	0.236269		0	#N/A	#N/A	#N/A	#N/A	#N/A
Tup.565	chrVIII	48060	48820	760		2.2394	2.10208	2.86123	3.12197		Intergenic	2	WSC4			7043.24	0.799634	0.00349981		6792.25	0.74211	0.00652925		4815.76	-0.155413	0.99407		9431.48	-0.0878143	0.575315			YHL029C	1192.34	0.274287	0.303144	0.207412	0.236269		YHL028W	291.309	1.83886	1.21988	0.229673	-0.389308
Tup.566	chrVIII	50340	51000	660		1.2649	1.34178	0.968645	1.4545		Intergenic	1	WSC4			1722.76	-0.264515	0.229117		2070.83	0.00103176	0.995713		1857.23	-0.00524305	0.99407		1963	0.390476	0.00898438			YHL028W	291.309	1.83886	1.21988	0.229673	-0.389308		YHL027W	853.014	0.406753	0.350527	0.0806202	0.0243943
Tup.567	chrVIII	54320	56510	2190		0.546314	0.453639	1.16184	1.62944		Intergenic	5	SNF6			4740.31	0.895365	1.20999e-09		5804.21	1.1481	3.43196e-24		3261.2	-0.0270332	0.99407		7648.25	0.360596	0.0172094			YHL025W	270.772	-0.185606	-0.489066	-0.0436458	-0.347105		YHL024W	262.838	1.94884	2.94994	-0.213922	0.787174
Tup.568	chrVIII	74480	75150	670		0.166595	0.300673	2.07596	2.62847		Intergenic	6	DUR3			2312.58	2.63299	2.15004e-53		2975.14	2.68204	2.95893e-81		678.819	0.169976	0.99407		4925.87	0.358332	0.0259041			YHL015W-A	#N/A	#N/A	#N/A	#N/A	#N/A		YHL015W	9688.78	-0.214431	-0.530054	0.159007	-0.156616
Tup.569	chrVIII	75340	76030	690		0.464554	0.340214	-0.650645	-0.829632		ORF	3	RPS20			563.358	-1.14222	5.86135e-10		568.717	-1.695	2.79999e-14		773.583	0.0145984	0.99407		334.198	-0.409764	0.0773515			RPS20	9688.78	-0.214431	-0.530054	0.159007	-0.156616		0	#N/A	#N/A	#N/A	#N/A	#N/A
Tup.570	chrVIII	105280	105790	510		0.735771	0.785582	-0.337831	-0.623191		Intergenic	3				631.749	-1.07605	8.88731e-12		628.705	-1.76601	9.83116e-18		860.62	0.0351262	0.99407		374.306	-0.531185	0.0103281			YHL001W	1490.37	-0.319225	-0.258786	-0.222478	-0.162039		YHR001W	297.539	-0.371348	-0.1884	-0.147149	0.0357988
Tup.571	chrVIII	115070	115470	400		0.32471	0.278918	0.135698	1.12178		Intergenic	7				620.781	-0.137117	0.376242		814.541	0.500741	0.000593719		625.26	-0.0981845	0.99407		834.591	0.676636	3.45839e-05			YHR005C	622.607	-0.27667	0.309296	0.043472	0.629437		YHR005C-A	619.089	0.0161264	-0.533591	0.00210055	-0.547617
Tup.572	chrVIII	115960	116300	340		0.623106	0.580621	-0.214656	-0.366856		tRNA	8	tT(AGU)H			375.555	-0.878179	4.89153e-07		365.669	-1.33662	3.98917e-12		475.538	-0.0398415	0.99407		254.997	-0.370344	0.0838316			YHR005C-A	619.089	0.0161264	-0.533591	0.00210055	-0.547617		tT(AGU)H	#N/A	#N/A	#N/A	#N/A	#N/A
Tup.573	chrVIII	121140	121700	560		0.434308	0.281525	-0.558237	-0.824289		ORF	3	ERG11			482.684	-0.986505	1.11336e-10		457.396	-1.54344	1.57916e-12		623.15	-0.0687859	0.99407		300.854	-0.493993	0.0239561			ERG11	12774	0.0122176	0.136403	-0.104854	0.0193314		0	#N/A	#N/A	#N/A	#N/A	#N/A
Tup.574	chrVIII	121830	122740	910		1.47122	1.42565	1.27899	2.07024		Intergenic	4	YHR007C-A			3363.24	-0.28094	0.214163		3929.18	0.0886093	0.714431		3531.95	-0.0976006	0.99407		3832.62	0.398882	0.0170409			YHR007C	12774	0.0122176	0.136403	-0.104854	0.0193314		YHR007C-A	32.7401	0.685873	0.725663	-0.0594068	-0.0196169
Tup.575	chrVIII	147860	148560	700		0.451948	0.326528	-0.693704	-0.889272		ORF	3	RPS27B			591.06	-1.06714	1.06662e-07		570.857	-1.70899	2.46262e-13		788.231	-0.0251483	0.99407		350.489	-0.539176	0.0235688			RPS27B	4204.29	-0.157582	-0.0266484	-0.314814	-0.18388		0	#N/A	#N/A	#N/A	#N/A	#N/A
Tup.576	chrVIII	150450	151520	1070		0.486783	0.536754	3.21441	3.54013		Intergenic	6	YHR022C-A			9246.64	3.6207	1.19719e-132		9816.56	3.40916	4.55411e-154		1447.22	0.130691	0.99407		18933.5	0.0573888	0.738074			YHR022C-A	20.5941	-2.21009	-2.54587	-0.259212	-0.594986		YHR023W	1749.1	0.101199	0.17075	0.0117975	0.0813477
Tup.577	chrVIII	174610	175870	1260		1.497	1.52015	1.54559	2.00627		Intergenic	4	ERC1	YHR033W		5409.1	0.730791	0.0114933		5999.54	0.761743	0.00158935		4005.38	-0.0115097	0.99407		7706.96	0.154886	0.47843			YHR032W	1079	0.48528	0.170836	-0.0379884	-0.352433		YHR033W	516.016	1.48073	1.33809	-0.281421	-0.42406
Tup.578	chrVIII	190030	190610	580		-0.125683	-0.180531	0.902251	0.936918		Intergenic	7				688.05	1.01575	1.75616e-07		711.1	0.776198	0.000702531		462.241	0.0435144	0.99407		982.135	-0.0548221	0.750947			YHR041C	392.903	0.342256	0.281939	-0.275703	-0.336019		YHR042W	5147.21	0.579773	0.408817	-0.0340986	-0.205055
Tup.579	chrVIII	201040	202000	960		-0.0379914	0.0673969	2.95017	3.60506		Intergenic	6	AAP1'			5525.79	3.66572	9.58917e-121		7623.64	3.80083	4.70252e-98		859.352	0.183555	0.99407		13222	0.461569	0.00400112			YHR047C	2155.29	-0.677596	-0.926022	0.00593263	-0.242494		YHR048W	176.713	0.869438	0.609245	-0.0181963	-0.278389
Tup.580	chrVIII	205840	206520	680		1.25218	1.11989	2.41296	2.88569		ORF	6	YHK8			3321.84	1.89983	4.89619e-20		3777.45	2.01364	1.9309e-26		1365.6	-0.0489162	0.99407		6106.41	0.197004	0.257761			YHK8	176.713	0.869438	0.609245	-0.0181963	-0.278389		0	#N/A	#N/A	#N/A	#N/A	#N/A
Tup.581	chrVIII	236220	236660	440		0.711548	0.718135	0.426258	0.639126		ORF	1	TRM5			734.748	-0.281276	0.0450233		787.164	-0.623248	3.68957e-05		827.551	0.0962766	0.99407		694.039	-0.116362	0.504402			TRM5	587.092	-0.0547192	-0.395371	0.0871545	-0.253497		0	#N/A	#N/A	#N/A	#N/A	#N/A
Tup.582	chrVIII	237750	238020	270		0.693974	0.472763	-0.225533	-0.44663		tRNA	8	tF(GAA)H1			277.932	-1.01047	2.86942e-08		241.334	-1.37575	1.87263e-12		339.726	-0.240236	0.99407		172.276	-0.476859	0.0373119			YHR071W	985.192	0.833134	2.34129	0.0738599	1.58202		tF(GAA)H	#N/A	#N/A	#N/A	#N/A	#N/A
Tup.583	chrVIII	243750	244060	310		0.844623	0.294081	0.657371	-0.835923		ORF	8	OSH3			448.525	-0.171765	0.521453		254.388	-1.4939	1.04472e-10		403.468	-0.494785	0.755859		299.835	-1.68451	2.74518e-16			OSH3	1311.65	-0.219916	-0.393703	-0.0514129	-0.2252		0	#N/A	#N/A	#N/A	#N/A	#N/A
Tup.584	chrVIII	266890	267440	550		0.72075	0.626583	1.55034	2.45612		Intergenic	5	YHR080C			1544.94	1.31609	3.97188e-21		2341.53	1.92374	5.18513e-41		876.413	-0.00668829	0.99407		3193.56	0.735692	1.79361e-06			YHR080C	897.042	0.443021	0.162452	-0.0306502	-0.311219		YHR081W	154.707	0.200623	-0.144911	0.283522	-0.0620125
Tup.585	chrVIII	288830	290380	1550		0.846365	0.794835	2.45875	2.62095		Intergenic	6				6834.93	1.92673	7.80052e-34		6556.73	1.79951	5.65416e-44		2721.43	-0.108164	0.99407		11347.9	-0.0996796	0.521823			YHR092C	3444.62	1.60301	2.35784	-0.37419	0.380649		YHR094C	2251.94	0.47787	-0.25729	0.284504	-0.450656
Tup.586	chrVIII	292320	294300	1980		0.548693	0.500774	1.41167	1.59349		Intergenic	5	HXT1			5569.47	1.16713	7.17956e-15		5762.44	1.04573	7.06115e-24		3386.27	-0.0177648	0.99407		8360.62	-0.00468428	0.978463			YHR094C	2251.94	0.47787	-0.25729	0.284504	-0.450656		YHR096C	82.7857	2.92246	1.86334	0.665405	-0.393713
Tup.587	chrVIII	296750	297200	450		0.965123	0.982134	1.62701	1.91442		Intergenic	4				1429.41	0.978854	4.08957e-10		1411.38	0.61751	0.000130909		975.127	0.065742	0.99407		1949.64	-0.16498	0.264457			YHR096C	82.7857	2.92246	1.86334	0.665405	-0.393713		YHR097C	303.773	0.788213	1.48192	-0.0832448	0.610461
Tup.588	chrVIII	298750	299040	290		-0.381421	-0.310955	0.312155	0.835293		Intergenic	7				293.223	0.834172	0.00339641		388.951	0.815243	0.0154348		231.968	0.253667	0.99407		470.828	0.383854	0.0629516			YHR097C	303.773	0.788213	1.48192	-0.0832448	0.610461		YHR098C	3248.71	-0.00875233	0.166082	-0.0643037	0.110531
Tup.589	chrVIII	374910	376030	1120		1.00679	0.808123	0.656824	0.711419		Intergenic	1	ARO9			1822.26	-0.293279	0.131765		1891.59	-0.202108	0.200442		1900.28	-0.135108	0.99407		1834.44	0.0908389	0.604479			YHR136C	208.532	-0.115415	-0.654066	0.0661067	-0.472544		YHR137W	940.964	0.147809	-0.0205068	-0.122568	-0.290884
Tup.590	chrVIII	379350	380130	780		0.469265	0.331542	2.17743	2.93007		Intergenic	6	SPS100			3230.74	2.54988	3.86087e-82		4495.79	2.92428	1.17512e-125		935.941	0.00242364	0.99407		7275.46	0.509159	0.000698365			YHR139C	39.5791	3.31134	3.26223	0.0653218	0.0162182		YHR140W	47.3795	2.70383	2.43992	0.264984	0.00107057
Tup.591	chrVIII	381480	382370	890		0.64987	0.558701	-0.500754	-0.638924		ORF	3	RPL42B	SNR32		811.778	-1.12764	1.36303e-12		831.641	-1.47327	4.49224e-16		1099.57	-0.0168421	0.99407		512.418	-0.23132	0.227117			RPL42B	2956.79	-0.217009	-0.475567	0.0736707	-0.184888		SNR32	171.758	0.424125	0.0584342	0.525009	0.159319
Tup.592	chrVIII	388790	389120	330		0.769424	0.564461	-0.160079	-0.214809		tRNA	8	SUF8			361.266	-0.897326	3.98654e-06		328.449	-1.22372	1.24874e-12		438.634	-0.179639	0.99407		242.602	-0.373244	0.0756428			YHR144C	157.663	-0.167925	-0.765226	0.285728	-0.311574		tP(UGG)H	10.8109	0.62943	0.0877149	0.10367	-0.438045
Tup.593	chrVIII	396780	397140	360		0.468381	0.515567	-0.586989	-0.0573694		Intergenic	8				388.592	-1.0813	6.07186e-09		479.342	-0.958682	9.9203e-10		545.812	0.111572	0.99407		310.285	0.364475	0.0830337			YHR149C	835.428	0.0613023	-0.503601	0.0571214	-0.507782		YHR150W	104.825	-0.357405	-0.392901	-0.0893895	-0.124886
Tup.594	chrVIII	400990	401360	370		0.776111	0.577408	-0.350551	0.12903		Intergenic	8				409.618	-0.881561	2.19697e-09		483.348	-0.837797	2.42161e-07		541.12	0.0773341	0.99407		342.977	0.24829	0.193992			YHR151C	670.269	0.339401	0.59232	-0.0599984	0.19292		YHR152W	149.887	0.298485	0.46932	0.320014	0.490849
Tup.595	chrVIII	411080	411560	480		0.488047	0.448054	-0.827044	-1.19042		snRNA	3	LIN1			381.811	-1.35485	6.99678e-11		368.079	-1.96503	2.85541e-14		534.616	-0.0543803	0.99407		196.886	-0.541293	0.0526395			YHR155W	675.655	-0.14505	-0.14007	-0.0238754	-0.018896		snR71	80.9542	0.279732	-0.123195	-0.14226	-0.545188
Tup.596	chrVIII	423320	423790	470		0.748149	0.220067	0.634604	-0.0147881		Intergenic	8	YHR162W			624.104	0.0464281	0.806509		436.603	-0.666551	0.000372196		545.316	-0.354775	0.27721		524.04	-0.926608	8.36834e-08			YHR162W	1240.46	-0.0769189	0.15432	-0.207864	0.0233749		YHR163W	942.644	-0.226285	-0.186242	-0.0649406	-0.0248977
Tup.597	chrVIII	451170	452970	1800		0.921509	0.739747	-0.192896	-0.804369		ORF	3	ENO2			2106.14	-1.06389	1.35488e-06		1881.44	-1.94066	2.07726e-18		2747.35	-0.0781135	0.99407		1153.4	-0.82776	1.2377e-05			ENO2	95888.8	-0.367688	-0.130354	-0.356163	-0.118829		0	#N/A	#N/A	#N/A	#N/A	#N/A
Tup.598	chrVIII	455170	456960	1790		1.62664	1.51195	2.45138	2.81997		Intergenic	2	FMO1	GON3		25351	1.17879	1.57622e-05		21636.6	0.892668	0.000981024		14460.8	-0.175671	0.99407		34174.2	-0.333713	0.0312016			YHR176W	74.7772	0.640114	0.978654	-0.173421	0.16512		YHR177W	110.271	1.6694	1.55946	0.19511	0.0851719
Tup.599	chrVIII	461820	462360	540		-0.120919	-0.02619	1.62127	2.26079		Intergenic	5				1196.59	1.96568	5.74194e-20		1649.73	2.11584	9.1822e-20		520.309	0.184151	0.99407		2476.96	0.476974	0.0125925			YHR178W	224.838	0.21292	0.0385953	-0.0129714	-0.187296		YHR179W	3476.37	0.630271	0.954111	-0.0285037	0.295336
Tup.600	chrVIII	470660	470940	280		0.0224929	-0.0423679	-0.00405714	0.737864		Intergenic	7	GND1			262.088	0.342391	0.172062		328.72	0.475912	0.107919		239.002	0.087041	0.99407		364.672	0.372344	0.0950492			YHR182W	160.92	-0.185166	-0.224644	-0.10627	-0.145748		YHR183W	8053.37	-0.0366169	0.179061	-0.131082	0.0845961
Tup.601	chrVIII	484190	484710	520		-0.222106	-0.101592	-0.436515	0.893321		ORF	7	PTH1			305.802	-0.204044	0.39206		542.749	0.689388	0.00449323		349.381	0.185835	0.99407		514.893	1.21995	6.11952e-10			PTH1	80.9685	0.18065	-0.110091	0.0503596	-0.240382		0	#N/A	#N/A	#N/A	#N/A	#N/A
Tup.602	chrVIII	504680	505180	500		0.389072	0.24919	-0.820012	-0.993786		ORF	3	RPS4B			337.554	-1.18421	7.53404e-10		345.796	-1.69155	5.95819e-12		469.263	0.0160596	0.99407		199.184	-0.357448	0.145846			RPS4B	6578.36	-0.237047	-0.328184	-0.0212764	-0.112414		0	#N/A	#N/A	#N/A	#N/A	#N/A
Tup.603	chrVIII	521710	522380	670		1.15848	1.08307	2.36655	2.62963		Intergenic	4				3100.31	1.60735	1.96213e-15		3178.08	1.50432	1.55767e-13		1499.78	-0.0316722	0.99407		5058.76	-0.00235558	0.989344			YHR210C	66.9237	1.84338	1.98015	-0.368614	-0.231843		YHR211W	827.97	1.91756	2.00066	0.0427099	0.125816
Tup.604	chrVIII	524150	525340	1190		0.977793	0.791499	3.52965	3.65318		ORF	6	FLO5			17445.9	3.64217	9.0559e-54		14559.4	3.38357	1.25523e-76		2420.31	-0.167088	0.99407		31768.9	-0.291828	0.0781433			FLO5	827.97	1.91756	2.00066	0.0427099	0.125816		0	#N/A	#N/A	#N/A	#N/A	#N/A
Tup.605	chrVIII	531140	532230	1090		2.82412	2.54161	2.99797	2.95461		Intergenic	2				17886.9	0.466159	0.104667		15444.6	0.206293	0.474107		13846.7	-0.206333	0.99407		20143.7	-0.338603	0.023885			YHR211W	827.97	1.91756	2.00066	0.0427099	0.125816	2 peaks, 1 IG	YHR212W-A	#N/A	#N/A	#N/A	#N/A	#N/A
Tup.606	chrVIII	537420	538660	1240		0.966772	0.820626	2.21855	2.52722		Intergenic	6				4611.53	0.892645	0.000607166		4631.85	0.882497	0.000388492		3055.36	-0.128028	0.99407		6481.22	-0.00987646	0.956795			YHR211W	827.97	1.91756	2.00066	0.0427099	0.125816	2 peaks, 1 IG	YHR212W-A	#N/A	#N/A	#N/A	#N/A	#N/A
Tup.607	chrVIII	540550	541480	930		0.776941	0.676226	1.77335	2.42307		Intergenic	4	YHR213W-A	YHR213W-B		2620.65	1.32459	9.17775e-13		3566.53	1.72497	2.42182e-25		1483.37	-0.000870978	0.996447		4989.18	0.533438	0.00572949			YHR213W-B	#N/A	#N/A	#N/A	#N/A	#N/A		YHR214W	18.2846	2.21001	1.28105	0.072336	-0.856624
Tup.608	chrVIII	548630	548920	290		0.0713069	0.308034	0.183069	0.38571		Intergenic	7				681.462	0.0962589	0.660243		795.2	-0.24643	0.248959		715.179	0.229379	0.99407		771.704	0.0250236	0.893384			YHR214W	18.2846	2.21001	1.28105	0.072336	-0.856624		YHR214C-D	#N/A	#N/A	#N/A	#N/A	#N/A
Tup.609	chrVIII	551350	552260	910		0.444187	0.444857	1.17436	1.58669		Intergenic	5				1815.9	0.911528	3.15901e-11		2075.47	0.878823	4.94991e-10		1279.76	0.0651454	0.99407		2735.55	0.169282	0.308052			YHR214C-E	#N/A	#N/A	#N/A	#N/A	#N/A		YHR215W	821.681	0.0477293	-0.413696	-0.279588	-0.741014
Tup.610	chrVIII	554120	554470	350		0.325226	0.322291	-0.612851	-0.964309		Intergenic	3	IMD2			469.272	-0.955485	2.84062e-07		473.224	-1.83316	8.69529e-17		638.208	0.101976	0.99407		284.551	-0.646527	0.00538527			YHR215W	821.681	0.0477293	-0.413696	-0.279588	-0.741014		YHR216W	952.788	0.177944	-0.0108238	-0.338466	-0.527234
Tup.611	chrX	9240	9900	660		0.174628	0.181308	1.40726	2.21429		Intergenic	5				1404.59	1.57085	6.9554e-14		2172.1	2.03755	2.67214e-36		733.793	0.112146	0.99407		3026.19	0.713526	0.000146748			YJL223C	#N/A	#N/A	#N/A	#N/A	#N/A		YJL222W	14.3589	-0.111674	0.25329	-0.211847	0.153116
Tup.612	chrX	18510	19430	920		2.5865	2.55059	3.83159	3.77498		Intergenic	2				29137.1	2.16841	3.70212e-15		27486.2	1.89943	7.50674e-12		10445.2	-0.00708644	0.994914		49115.6	-0.147884	0.373011			YJL221C	#N/A	#N/A	#N/A	#N/A	#N/A		YJL219W	20.018	0.976814	1.93245	-0.105019	0.850616
Tup.613	chrX	21380	23210	1830		0.988833	0.850598	1.58914	1.67986		Intergenic	4	YJL218W			6182.19	1.41088	1.27668e-12		5707.22	1.16516	2.54004e-12		3250.29	-0.0873344	0.99407		9112.04	-0.198356	0.210211			YJL219W	20.018	0.976814	1.93245	-0.105019	0.850616		YJL218W	69.2583	2.75004	3.1888	-0.0384206	0.400338
Tup.614	chrX	26010	26820	810		2.13905	1.88352	2.38751	2.84937		Intergenic	2				5818.45	0.752161	0.00675543		6408.61	1.00116	0.000479189		4054.12	-0.160625	0.99407		8554	0.215781	0.185465			YJL216C	201.986	2.90682	3.54864	-0.0180226	0.623799		YJL214W	233.972	3.80824	4.11073	-0.115854	0.186632
Tup.615	chrX	31080	31840	760		0.262362	0.219491	1.39774	1.94894		Intergenic	5				1367.22	1.51279	7.49352e-27		1740.37	1.73465	7.1503e-24		713.922	0.0246878	0.99407		2538.29	0.388789	0.00898438			YJL214W	233.972	3.80824	4.11073	-0.115854	0.186632		YJL213W	238.764	1.63484	0.752735	0.0785036	-0.803597
Tup.616	chrX	36380	37410	1030		0.130763	0.120454	1.71693	2.81021		Intergenic	5	PEX2			2152.34	2.04755	1.07386e-34		3790.75	2.70509	7.66545e-46		869.731	0.108132	0.99407		5420.75	0.90919	6.11952e-10			YJL212C	1235.09	-0.310571	-0.549261	-0.0299894	-0.268679		YJL210W	245.837	-0.300528	-0.159938	-0.239686	-0.099097
Tup.617	chrX	58950	59270	320		0.724831	0.618334	0.00760937	0.0780563		tRNA	8	tT(AGU)J			383.019	-0.728612	2.00921e-05		390.956	-0.914893	1.85034e-09		465.154	-0.0510233	0.99407		302.252	-0.10603	0.584191			YJL200C	1515.3	-0.372105	0.352836	0.0250844	0.750026		tT(AGU)J	#N/A	#N/A	#N/A	#N/A	#N/A
Tup.618	chrX	60150	60790	640		-0.342658	-0.351209	1.55161	2.09952		Intergenic	5				1201.57	2.27191	1.12261e-16		1721.62	2.57077	6.3541e-19		428.832	0.101171	0.99407		2665.5	0.551725	0.000151632			tT(AGU)J	#N/A	#N/A	#N/A	#N/A	#N/A		YJL198W	1445.39	0.148518	-0.0479058	-0.106783	-0.303207
Tup.619	chrX	68870	69400	530		1.44152	1.2837	0.457769	1.04023		Intergenic	1				1267.32	-1.06239	8.23055e-07		1405.94	-0.502381	0.0172305		1586	-0.19943	0.99407		1072.36	0.488057	0.00230918			YJL196C	617.868	0.836103	0.905378	-0.312937	-0.243662		YJL194W	377.468	0.290377	-0.0258595	0.0147394	-0.301497
Tup.620	chrX	73610	75240	1630		0.775707	0.604009	-0.52802	-0.557751		ORF	3	RPS14B	RPS22A		1591.08	-1.21549	6.27189e-12		1576.64	-1.67837	4.66929e-18		2178.43	-0.0392312	0.99407		920.843	-0.371678	0.0570377			RPS14B	1997.14	-0.301118	-0.0566397	-0.0565818	0.187896		RPS22A	6475.1	-0.213249	-0.300224	-0.278423	-0.365398
Tup.621	chrX	75420	75790	370		0.145895	0.081	-0.467986	-0.403592		Intergenic	3				383.745	-0.71473	0.00268995		394.157	-0.940142	0.00033224		469.934	-0.0412869	0.99407		301.976	-0.127884	0.580657			YJL190C	6475.1	-0.213249	-0.300224	-0.278423	-0.365398		YJL189W	1586.83	-0.529474	-0.533358	0.0907218	0.0868376
Tup.622	chrX	76000	76420	420		0.491543	0.460069	-0.833955	-1.11173		ORF	3	RPL39			349.61	-1.39666	1.50084e-12		347.234	-2.03247	5.75272e-22		500.572	-0.0128558	0.99407		177.688	-0.518288	0.0375572			RPL39	1586.83	-0.529474	-0.533358	0.0907218	0.0868376		0	#N/A	#N/A	#N/A	#N/A	#N/A
Tup.623	chrX	79430	79700	270		0.224996	0.173719	-0.493856	0.180837		Intergenic	8				220.138	-0.626526	0.00192068		276.382	-0.461089	0.0298575		276.659	0.103589	0.99407		218.248	0.40825	0.0489292			YJL187C	506.021	-0.132302	-0.514633	0.0220164	-0.360315		YJL186W	1607.49	0.297925	0.222404	-0.0701206	-0.145642
Tup.624	chrX	100920	101910	990		-0.21573	0.0712515	1.00664	1.70793		Intergenic	5	ASG7			1867.14	2.00971	1.81989e-19		2479.12	1.95241	9.34015e-21		826.914	0.294823	0.99407		3746.41	0.379342	0.024004			YJL171C	3060.88	1.01499	2.02713	-0.702885	0.309262		YJL170C	30.7481	0.139727	4.49546	-2.78732	1.56842
Tup.625	chrX	115860	116160	300		0.712783	0.513877	-0.24887	-0.202853		tRNA	8	tE(UUC)J			309.916	-0.952748	1.32602e-06		302.529	-1.26742	2.56111e-15		394.09	-0.0863071	0.99407		209.984	-0.264516	0.223257			YJL162C	123.767	-0.355925	-0.131788	-0.0589269	0.16521		tE(UUC)J	#N/A	#N/A	#N/A	#N/A	#N/A
Tup.626	chrX	119230	119660	430		0.558696	0.335783	0.162573	0.439858		Intergenic	8				505.731	-0.376671	0.0144462		553.944	-0.150513	0.299525		544.966	-0.1231	0.99407		521.492	0.235089	0.207211			YJL160C	19.6515	0.902029	0.936828	-0.0331032	0.00169587		YJL159W	28096.6	0.859274	0.889635	0.116781	0.147142
Tup.627	chrX	119820	124120	4300		0.819776	0.727403	0.230369	0.327944		ORF	8	CIS3	HSP150		7269.09	-0.00480802	0.979617		7223.06	-0.279272	0.107919		7155.12	-0.0253221	0.99407		7436.38	-0.168947	0.276258			CIS3	7006.1	0.705536	1.25025	0.0130369	0.557749		HSP150	28096.6	0.859274	0.889635	0.116781	0.147142
Tup.628	chrX	136010	136560	550		0.507145	0.339339	-0.168863	-0.0765829		ORF	8	INO1	SNA3		536.243	-0.480471	0.00109057		551.161	-0.789518	6.0544e-05		623.063	0.00471901	0.99407		459.687	-0.171426	0.36429			INO1	455.528	0.76274	2.42954	-0.267722	1.39908		SNA3	574.261	0.420356	0.848861	-0.185785	0.24272
Tup.629	chrX	139260	140270	1010		0.966664	0.819982	-0.269311	-0.528272		snRNA	8				1138.74	-1.21739	4.98772e-10		1042.51	-1.71304	2.54312e-20		1504.53	-0.140968	0.99407		632.531	-0.506399	0.00400112			snR190	1941.47	-0.351083	0.0691132	-0.427995	-0.00779826		YJL148W	492.693	-0.301046	-0.653638	0.231576	-0.121016
Tup.630	chrX	157520	157890	370		0.128881	0.257505	-0.452162	0.0436676		Intergenic	8				323.247	-0.482654	0.0183472		399.782	-0.585808	0.00120961		402.761	0.193972	0.99407		317.692	0.230251	0.247352			YJL136C	2822.45	-0.362016	-0.441451	0.0583371	-0.0210983		YJL134W	612.569	0.383836	0.201464	-0.239826	-0.422198
Tup.631	chrX	159550	160250	700		1.16022	1.12487	0.9826	1.16089		Intergenic	1	YJL133C-A			1588.38	-0.176025	0.377849		1619.32	-0.316595	0.0655221		1638.14	-0.0522027	0.99407		1587.79	-0.0649354	0.704923			YJL133C-A	220.605	0.705429	1.81795	-0.362992	0.749532		YJL133W	423.542	-0.0521679	-0.167781	0.0413939	-0.0742196
Tup.632	chrX	172690	173460	770		0.270571	0.207936	-0.389405	-0.116741		Intergenic	8	URA2			796.7	-0.589349	0.000618467		866.719	-0.689305	7.66253e-05		954.949	0.00522032	0.99407		701.329	0.0401831	0.835831			YJL130C	23330	0.0292374	0.377407	-0.165527	0.182643		YJL129C	1596.16	-0.0474081	-0.244051	0.111276	-0.0853678
Tup.633	chrX	180510	182500	1990		0.238746	0.256645	2.01581	2.08937		Intergenic	5	SPT10	YJL127C-A		8263.92	2.39733	2.51441e-92		8207.37	2.15123	2.86414e-60		2659.96	0.0433278	0.99407		14744.2	-0.0670277	0.668394			YJL128C	935.261	0.480723	0.566933	0.105389	0.191599		YJL127C-B	93.4949	-0.150574	-0.325739	0.243444	0.0682784
Tup.634	chrX	195190	196070	880		1.28867	1.2243	1.79131	1.91746		Intergenic	4				3173.01	0.746177	0.000227897		3132.67	0.571281	0.000981601		2301.19	-0.0556021	0.99407		4171.51	-0.103062	0.507869			YJL116C	216.881	4.74361	4.45829	0.0385811	-0.246735		YJL115W	219.153	-0.00176064	-0.238405	-0.0974071	-0.334052
Tup.635	chrX	197230	197540	310		0.788177	0.655619	-0.0728097	0.183816		tRNA	8	ASF1	tA(AGC)J		344.677	-0.810006	1.49263e-05		368.263	-0.869007	9.42997e-09		430.213	-0.0328106	0.99407		276.044	0.0430921	0.836023			tA(AGC)J	#N/A	#N/A	#N/A	#N/A	#N/A	2 peaks, 1 IG	tD(GUC)J	#N/A	#N/A	#N/A	#N/A	#N/A
Tup.636	chrX	204590	204880	290		0.536834	0.412262	-0.373566	-0.656738		tRNA	3	tD(GUC)J1			318.995	-0.906633	2.55726e-08		295.127	-1.37074	5.61217e-09		396.971	-0.11404	0.99407		208.487	-0.452531	0.0570377			tA(AGC)J	#N/A	#N/A	#N/A	#N/A	#N/A	2 peaks, 1 IG	tD(GUC)J	#N/A	#N/A	#N/A	#N/A	#N/A
Tup.637	chrX	220130	221060	930		1.11232	1.01567	1.11414	1.64454		Intergenic	1	IME2			2299.74	0.166421	0.395923		2702.56	0.284305	0.136511		2163.86	0.0243965	0.99407		2920.58	0.270796	0.0884855			YJL107C	233.541	0.39982	1.44952	0.138578	1.18828		YJL106W	82.6703	0.36661	1.34895	-0.11622	0.866122
Tup.638	chrX	223530	224960	1430		1.3118	1.28644	3.25254	3.61748		ORF	2	SET4			12790.1	2.37741	1.59275e-29		12777.5	2.26238	2.25847e-28		4016.13	-0.0491266	0.99407		22998.2	-0.033182	0.83915			SET4	62.864	2.32221	2.40201	-0.414513	-0.334709		0	#N/A	#N/A	#N/A	#N/A	#N/A
Tup.639	chrX	227750	228580	830		0.922696	0.852539	0.300992	0.0398907		ORF	8	PAM16	SNR37		1159.06	-0.605334	0.00134583		1067.87	-1.13565	2.5478e-10		1350.44	-0.0773827	0.99407		856.044	-0.476753	0.00553182			PAM16	242.373	-0.232141	-0.301762	0.131003	0.0613818		SNR37	18001.1	0.0119982	0.273717	-0.154163	0.107556
Tup.640	chrX	265430	265920	490		0.749598	0.808073	0.508358	0.81032		Intergenic	1	SIP4			653.487	-0.064523	0.708411		739.247	-0.170819	0.282842		681.316	0.0816535	0.99407		721.579	0.10653	0.528134			YJL090C	284.429	0.120739	0.0981121	0.0128476	-0.00977893		YJL089W	107.964	2.06769	2.68793	0.478522	1.09876
Tup.641	chrX	290920	291760	840		1.34547	1.22954	2.57066	2.97538		ORF	6	PRY3			4557.07	1.54718	8.16556e-13		5142.46	1.70968	5.94091e-16		2228.24	-0.0919566	0.99407		7922.6	0.200247	0.210655			PRY3	962.995	-0.335309	-0.885971	0.295356	-0.255306		0	#N/A	#N/A	#N/A	#N/A	#N/A
Tup.642	chrX	293720	295200	1480		1.68072	1.61247	3.07792	3.61693		ORF	2	ICS3	PRY3		10117.7	1.7596	2.63474e-16		13487.7	2.14229	9.68763e-22		4513.74	-0.0320175	0.99407		20319	0.481252	0.00168297			ICS3	#N/A	#N/A	#N/A	#N/A	#N/A		PRY3	962.995	-0.335309	-0.885971	0.295356	-0.255306
Tup.643	chrX	337560	338150	590		-0.447959	-0.221693	1.37297	2.09669		Intergenic	5	YJL052C-A			990.702	2.25439	3.04023e-19		1445.76	2.28809	1.379e-15		392.236	0.351783	0.99407		2183.26	0.536345	0.00247291			YJL052C-A	#N/A	#N/A	#N/A	#N/A	#N/A		YJL052W	2058.5	4.40323	5.04158	0.202858	0.841208
Tup.644	chrX	348710	349440	730		1.0505	1.03155	0.726033	0.811106		snRNA	1	UBX6	YJL047C-A		1339.53	-0.164893	0.339893		1444.32	-0.226215	0.161956		1398.79	-0.00928516	0.99407		1402.64	0.0592074	0.714253			snR60	#N/A	#N/A	#N/A	#N/A	#N/A		YJL047C	380.573	0.0507388	0.198428	-0.0471719	0.100517
Tup.645	chrX	355300	355660	360		0.936139	0.699	0.161892	0.370503		tRNA	8	tD(GUC)J2	tR(UCU)J1		433.216	-0.773457	9.6555e-05		426.027	-0.727377	3.79495e-06		508.267	-0.189217	0.99407		345.545	-0.0105568	0.964365			tD(GUC)J	#N/A	#N/A	#N/A	#N/A	#N/A		YJL045W	40.2957	1.89814	3.22593	0.0427642	1.37055
Tup.646	chrX	360330	361240	910		0.96317	0.875438	2.0311	2.89454		ORF	6	YJL043W			4084.03	1.8823	2.73997e-27		5594.3	2.2313	3.25474e-40		1742.38	0.0267509	0.99407		8456.14	0.508195	0.00127025			YJL043W	5.18645	-0.152769	-0.0449274	-0.113206	-0.00536422		0	#N/A	#N/A	#N/A	#N/A	#N/A
Tup.647	chrX	374330	374690	360		0.690697	0.615772	-0.0673222	-0.0928056		tRNA	8	tD(GUC)J3	tR(UCU)J2		417.653	-0.772752	2.77708e-05		407.852	-1.13141	1.63237e-12		511.799	-0.0610465	0.99407		304.518	-0.284827	0.135045			YJL039C	3117.7	-0.147032	0.0918867	-0.155192	0.0837262		tD(GUC)J	#N/A	#N/A	#N/A	#N/A	#N/A
Tup.648	chrX	380860	382330	1470		0.127132	0.11759	0.0573537	-0.191367		ORF	8	KAR2			1457.83	0.314683	0.0775241		1425.47	-0.261658	0.128138		1343.44	0.101218	0.99407		1572.48	-0.334131	0.0173784			KAR2	13077	0.235304	-0.0701301	-0.00149178	-0.306926	2 peaks, 1 IG	0	#N/A	#N/A	#N/A	#N/A	#N/A
Tup.649	chrX	382420	383080	660		-0.05378	-0.00988	-0.590871	-1.00502		ORF	3	KAR2			429.59	-0.522382	0.00296077		413.467	-1.41457	7.32375e-08		520.934	0.0896696	0.99407		311.576	-0.66787	0.00301516			KAR2	13077	0.235304	-0.0701301	-0.00149178	-0.306926	2 peaks, 1 IG	0	#N/A	#N/A	#N/A	#N/A	#N/A
Tup.650	chrX	390950	391350	400		0.612473	0.553903	0.151789	0.201248		tRNA	8				493.655	-0.426339	0.0146204		480.415	-0.688596	3.82274e-06		545.587	-0.0801477	0.99407		426.372	-0.210975	0.222721			YJL029C	610.133	-0.0466274	-0.0469281	0.138984	0.138684		tM(CAU)J	#N/A	#N/A	#N/A	#N/A	#N/A
Tup.651	chrX	391430	392270	840		1.31027	1.30399	1.11445	1.55195		Intergenic	4	YJL027C	YJL028W		2307.81	-0.018411	0.923937		2542.12	-0.00895065	0.964728		2292.23	-0.0105688	0.99407		2611.21	0.127294	0.44909			YJL028W	#N/A	#N/A	#N/A	#N/A	#N/A		YJL027C	#N/A	#N/A	#N/A	#N/A	#N/A
Tup.652	chrX	404900	405300	400		-0.613475	-0.411696	0.136893	1.04905		Intergenic	7				363.594	1.04632	0.00301814		629.253	1.52018	1.26745e-05		264.582	0.290537	0.99407		769.146	0.90258	0.0307029			YJL019W	406.641	-0.129255	-0.657479	-0.0383607	-0.566585		YJL016W	528.257	0.44493	0.817453	-0.0230014	0.349521
Tup.653	chrX	414870	415130	260		0.709042	0.483973	-0.334627	-0.488785		tRNA	3	tK(CUU)J			277.411	-1.0458	5.30832e-09		257.997	-1.36901	6.00142e-12		351.508	-0.154136	0.99407		175.785	-0.350015	0.120086			YJL011C	44.2357	-0.373864	-0.584997	0.0395406	-0.171593		tK(CUU)J	#N/A	#N/A	#N/A	#N/A	#N/A
Tup.654	chrX	422850	423100	250		0.543308	0.385428	-0.536636	-0.674208		tRNA	3	CTK2	EMT3		232.608	-0.962146	2.25394e-07		226.213	-1.4858	2.2249e-13		301.761	-0.0328748	0.99407		149.579	-0.423334	0.085901			YJL008C	1625.43	-0.316867	-0.428181	-0.105809	-0.217122		tM(CAU)J	#N/A	#N/A	#N/A	#N/A	#N/A
Tup.655	chrX	424330	424680	350		0.663337	0.569631	-0.26956	-0.0811457		tRNA	8	SUP51			366.786	-0.965181	5.01047e-10		369.133	-1.14932	2.45423e-12		468.311	-0.0794671	0.99407		258.259	-0.133924	0.526372			YJL006C	99.0057	0.0503731	0.0242589	0.176828	0.150714		tL(UAA)J	#N/A	#N/A	#N/A	#N/A	#N/A
Tup.656	chrX	436220	436490	270		-0.00422222	0.417481	-0.688515	-0.987056		Intergenic	3				217.786	-0.813355	0.000501715		240.722	-1.92011	2.33462e-13		308.328	0.304705	0.99407		139.621	-0.674311	0.0213109			YJL001W	746.063	-0.218713	-0.0331233	-0.097246	0.0883442		YJR001W	1803.75	-0.0221522	0.183591	-0.146732	0.0590113
Tup.657	chrX	445030	445740	710		-0.557619	-0.158518	-1.00344	1.90604		ORF	7	SAG1			376.083	-0.46626	0.189909		1721.13	1.57584	1.14894e-08		605.64	0.820747	0.99407		1562.04	3.02051	5.74333e-49			SAG1	6171.46	0.170777	2.94341	3.88655	6.65919		0	#N/A	#N/A	#N/A	#N/A	#N/A
Tup.658	chrX	453930	454600	670		0.446421	0.378706	-0.590388	-0.72602		ORF	3	TDH2			549.816	-0.986587	1.49922e-07		548.156	-1.53382	7.72633e-18		727.488	0.00715964	0.99407		350.669	-0.406911	0.0570377			TDH2	18917.6	-0.438961	0.583209	-0.0064321	1.01574		0	#N/A	#N/A	#N/A	#N/A	#N/A
Tup.659	chrX	455040	455440	400		0.697946	0.791124	-0.182634	0.0209115		Intergenic	8				608.016	-1.01263	2.7689e-12		712.844	-1.14042	4.75884e-14		842.463	0.123043	0.99407		458.148	0.125701	0.485278			YJR009C	18917.6	-0.438961	0.583209	-0.0064321	1.01574		YJR010W	649.402	-0.746357	0.234256	0.22482	1.20543
Tup.660	chrX	459340	459730	390		-0.422851	-0.34459	1.12165	0.0471205		Intergenic	7	YJR011C			587.587	1.64511	5.42233e-14		324.796	-0.0576048	0.875976		290.736	0.0527919	0.99407		652.757	-1.50188	8.93905e-20			YJR011C	36.9659	-0.279024	0.226867	-0.328696	0.177196		YJR012C	60.8084	-0.153744	0.975047	0.104738	1.23353
Tup.661	chrX	472670	473210	540		0.226615	0.151048	-0.0295119	0.494241		Intergenic	7				630.74	-0.283831	0.0801395		766.352	0.0124865	0.950826		686.676	-0.0167303	0.99407		722.006	0.417829	0.0106056			YJR025C	255.528	-1.38256	0.415465	0.0389616	1.83699	2 peaks, 1 IG	YJR030C	334.651	-0.119756	-0.319547	-0.0705812	-0.270372
Tup.662	chrX	478310	478810	500		0.471936	0.217686	0.206777	0.682978		Intergenic	7				750.899	-0.262517	0.060863		926.826	0.0074191	0.958522		821.294	0.0217574	0.99407		869.42	0.427455	0.00538527			YJR025C	255.528	-1.38256	0.415465	0.0389616	1.83699	2 peaks, 1 IG	YJR030C	334.651	-0.119756	-0.319547	-0.0705812	-0.270372
Tup.663	chrX	523920	524250	330		0.773842	0.495355	-0.131088	-0.2125		tRNA	8	tS(AGA)J			372.322	-0.821341	1.32602e-06		364.686	-1.09314	2.21307e-09		457.953	-0.0842585	0.99407		271.089	-0.224308	0.255333			YJR046W	570.574	-0.25584	-0.255927	-0.192581	-0.192668		tS(AGA)J	#N/A	#N/A	#N/A	#N/A	#N/A
Tup.664	chrX	525500	526290	790		0.800099	0.724749	0.627962	0.895984		Intergenic	1				1619.7	-0.156832	0.370937		1664.8	-0.227034	0.11972		1651.27	-0.0774365	0.99407		1655.43	-0.0126279	0.936323			YJR047C	586.13	5.34583	5.23479	0.193699	0.0826607		YJR048W	736.543	-0.140467	0.386456	-0.264252	0.262671
Tup.665	chrX	531730	532040	310		0.698423	0.617232	-0.174616	-0.223716		tRNA	8	tG(GCC)J2			332.453	-0.799279	5.27354e-06		323.267	-1.25933	1.11054e-08		413.234	-0.0357677	0.99407		233.743	-0.369091	0.103377			YJR051W	350.114	-0.28588	-0.22965	0.00497146	0.0612017		tG(GCC)J	#N/A	#N/A	#N/A	#N/A	#N/A
Tup.666	chrX	542860	543120	260		0.569846	0.465731	-0.481788	-0.705638		tRNA	3	SUP4			260.248	-0.983933	2.39698e-07		254.353	-1.51718	4.5721e-15		339.852	-0.028257	0.99407		165.569	-0.428543	0.078804			YJR056C	160.599	0.213113	-0.232095	0.371829	-0.0733797		tY(GUA)J	#N/A	#N/A	#N/A	#N/A	#N/A
Tup.667	chrX	549570	550360	790		0.329612	0.414841	0.918853	1.99858		ORF	5	CBF1			1425.2	1.12497	7.89479e-15		2354.45	1.84382	2.06224e-39		905.35	0.0430697	0.99407		3043.14	0.898926	6.54909e-10			CBF1	634.558	-0.109713	-0.331087	-0.064225	-0.2856		0	#N/A	#N/A	#N/A	#N/A	#N/A
Tup.668	chrX	605900	608070	2170		1.394	1.24271	3.34801	3.48267		Intergenic	2				44008.9	2.62064	6.27608e-21		34870.1	2.21686	1.60848e-18		11611.2	-0.135036	0.99407		71835.9	-0.409643	0.0151673			YJR094C	50.8854	1.36045	2.77735	-0.174388	1.24252		YJR094W-A	1789.8	-0.313793	-0.291217	-0.182796	-0.160221
Tup.669	chrX	608540	609350	810		0.703534	0.675719	0.175289	0.0786444		ORF	8	RPL43B			1149.21	-0.375094	0.0072403		1147.66	-0.720049	2.09617e-09		1283.12	-0.0104445	0.99407		1008.71	-0.222753	0.129063			RPL43B	1789.8	-0.313793	-0.291217	-0.182796	-0.160221		0	#N/A	#N/A	#N/A	#N/A	#N/A
Tup.670	chrX	617810	618080	270		0.652252	0.484315	-0.385189	-0.4238		tRNA	8	tL(UAG)J			284.918	-0.985669	5.59724e-08		267.34	-1.34256	1.51082e-09		359.256	-0.126599	0.99407		184.978	-0.356746	0.119266			YJR100C	139.564	-0.33846	0.31372	-0.326821	0.325359		tL(UAG)J	#N/A	#N/A	#N/A	#N/A	#N/A
Tup.671	chrX	620350	620610	260		-0.198969	-0.2945	0.716646	-0.116396		Intergenic	7				319.599	0.951364	0.000128679		214.6	-0.289359	0.380074		215.097	-0.0517604	0.99407		331.57	-1.143	1.7654e-11			YJR102C	101.936	-0.20329	-0.043813	0.303684	0.463161		YJR103W	767.683	0.361491	0.946826	-0.129963	0.455371
Tup.672	chrX	623120	623510	390		0.443628	0.354441	0.160513	0.519459		Intergenic	8	SOD1			471.503	-0.148547	0.451808		544.74	-0.251	0.134716		511.833	0.101807	0.99407		510.215	0.133098	0.495557			YJR104C	2605.08	-0.15076	-0.167212	-0.0683432	-0.0847953		YJR105W	4333.47	-0.174836	0.0911681	-0.241443	0.0245612
Tup.673	chrX	639100	640770	1670		1.02266	0.896614	1.82703	1.91841		ORF	4	YJR115W			4693.09	1.13028	3.74222e-11		4667.77	0.901222	1.93654e-07		2918.91	-0.00322565	0.994879		6780.61	-0.100407	0.581443			YJR115W	64.7256	1.42797	1.06298	0.16664	-0.198344		0	#N/A	#N/A	#N/A	#N/A	#N/A
Tup.674	chrX	641540	642010	470		0.584367	0.786696	0.341951	0.190272		Intergenic	8	YJR116W			583.163	-0.156486	0.298536		590.38	-0.731988	3.70163e-08		635.171	0.114065	0.99407		537.815	-0.326749	0.0506979			YJR116W	342.161	1.72141	1.24512	0.150242	-0.32604		YJR117W	2436.29	0.392074	0.427171	-0.00373843	0.0313587
Tup.675	chrX	651870	652660	790		0.774953	0.59838	-0.564705	-0.800061		ORF	3	RPS5			783.455	-1.38418	2.57278e-13		734.442	-1.77227	1.12132e-14		1070.52	-0.144628	0.99407		413.155	-0.405466	0.0785043			RPS5	16130.1	-0.286716	-0.329725	-0.0490544	-0.0920627		0	#N/A	#N/A	#N/A	#N/A	#N/A
Tup.676	chrX	662710	664360	1650		1.22049	1.16303	0.789587	0.997818		snRNA	1	RSF2	YJR129C		8654.5	-0.258449	0.338184		9257.99	-0.111995	0.698996		8965.95	-0.11114	0.99407		9063.7	0.160653	0.26301			YJR127C	823.05	1.56239	1.49008	0.015659	-0.0566538		snR3	174.647	0.178268	0.115917	0.185498	0.123147
Tup.677	chrX	669280	669550	270		-0.373856	-0.230937	0.780578	-0.154889		ORF	7	MNS1	NMD5		322.522	1.16739	1.95755e-07		225.106	-0.0912476	0.781555		203.596	0.060102	0.99407		358.256	-1.04679	7.34784e-09			MNS1	495.137	0.402606	0.461663	-0.0619942	-0.00293712		NMD5	1339.38	-0.326177	-0.243722	-0.0629659	0.0194889
Tup.678	chrX	702040	702800	760		0.515253	0.445884	-0.542015	-0.779899		ORF	3	RPS4A			638.524	-1.00416	2.03342e-10		624.439	-1.62501	1.09617e-11		845.428	-0.00788594	0.99407		394.164	-0.49906	0.025823			RPS4A	7174.7	-0.302281	-0.322201	-0.152946	-0.172866		0	#N/A	#N/A	#N/A	#N/A	#N/A
Tup.679	chrX	703200	704280	1080		1.28169	1.45266	2.19299	2.03198		Intergenic	4				6932.38	1.46464	1.43575e-10		5624.54	0.715384	0.000364645		3731.52	0.0636989	0.99407		9285.44	-0.55648	0.000665352			YJR145C	7174.7	-0.302281	-0.322201	-0.152946	-0.172866		YJR147W	274.087	0.0698492	-0.849513	0.212168	-0.707194
Tup.680	chrX	705160	705640	480		0.948614	1.02222	1.4228	1.22403		Intergenic	1	HMS2			1242.32	0.743801	2.4684e-06		1102.47	0.0771666	0.627931		940.941	0.0609049	0.99407		1455.59	-0.477877	0.00286431			YJR147W	274.087	0.0698492	-0.849513	0.212168	-0.707194		YJR148W	1822.09	-0.11707	-0.593175	0.0839787	-0.392126
Tup.681	chrX	709590	710770	1180		-0.156509	-0.149207	2.15909	3.02062		Intergenic	6				3715.85	2.87905	3.50548e-50		5595.02	3.24673	3.02914e-49		921.587	0.102456	0.99407		8999.36	0.612842	2.91267e-05			YJR150C	189.456	6.89808	7.12428	-0.18297	0.0432321		YJR151C	98.7786	1.13411	1.29421	0.0923939	0.252489
Tup.682	chrX	715780	716620	840		-0.0995085	-0.17472	1.81902	1.564		ORF	5	DAN4			1903.67	2.24566	3.03218e-36		1570.08	1.61274	1.48949e-12		677.221	0.063617	0.99407		2981.43	-0.42942	0.00545474			DAN4	98.7786	1.13411	1.29421	0.0923939	0.252489	2 peaks, 1 IG	0	#N/A	#N/A	#N/A	#N/A	#N/A
Tup.683	chrX	716750	717720	970		-0.320237	-0.264816	1.29938	1.74845		ORF	5	DAN4			1411.13	1.91852	1.69719e-14		1778.01	1.90435	6.30945e-12		630.881	0.180976	0.99407		2724.71	0.31332	0.0660152			DAN4	98.7786	1.13411	1.29421	0.0923939	0.252489	2 peaks, 1 IG	0	#N/A	#N/A	#N/A	#N/A	#N/A
Tup.684	chrX	724130	724760	630		-0.620988	-0.441981	-1.01789	1.39989		Intergenic	7				297.907	-0.384784	0.292725		861.277	1.54365	0.000177129		365.8	0.216992	0.99407		833.543	2.3013	5.45797e-08			YJR153W	10.5145	-2.3948	-2.02802	-0.112349	0.25443	2 peaks, 1 IG	YJR154W	124.996	0.323003	1.54279	-0.212078	1.00771
Tup.685	chrX	725070	725570	500		-0.282187	-0.210766	0.117028	0.639484		Intergenic	7				386.837	0.457442	0.062969		504.617	0.601068	0.0256179		342.629	0.137568	0.99407		569.265	0.428143	0.014317			YJR153W	10.5145	-2.3948	-2.02802	-0.112349	0.25443	2 peaks, 1 IG	YJR154W	124.996	0.323003	1.54279	-0.212078	1.00771
Tup.686	chrX	731270	732940	1670		2.23074	2.06097	1.39632	1.73106		Intergenic	4	HXT16			20165.7	0.114473	0.71993		19776.1	-0.0851348	0.788739		18682	-0.0657178	0.99407		21661.2	-0.136852	0.446811			YJR156C	24.5478	0.66665	1.37182	-0.243852	0.461316		YJR158W	#N/A	#N/A	#N/A	#N/A	#N/A
Tup.687	chrX	734940	736910	1970		1.70064	1.52404	1.2103	1.21373		Intergenic	4	SOR1			13098.4	0.312878	0.290824		11891	-0.0683854	0.822436		11218.7	-0.0782759	0.99407		14102.7	-0.335482	0.0245913			YJR158W	#N/A	#N/A	#N/A	#N/A	#N/A		YJR159W	10.5241	2.66741	3.30101	-0.23472	0.398881
Tup.688	chrXI	1250	1560	310		-0.116348	-0.0762258	0.153652	0.943552		ORF	7				273.581	0.439715	0.0568654		365.13	0.775927	0.00158793		236.966	0.0535175	0.99407		417.886	0.534495	0.00232326			.	#N/A	#N/A	#N/A	#N/A	#N/A		0	#N/A	#N/A	#N/A	#N/A	#N/A
Tup.689	chrXI	2220	2920	700		0.366772	0.393292	1.86934	2.88766		Intergenic	6				2095.85	2.20495	1.9397e-55		3430.67	2.77804	5.55782e-93		762.964	0.0734227	0.99407		5095.53	0.783364	8.51684e-08			YKL224C	#N/A	#N/A	#N/A	#N/A	#N/A		YKL222C	209.251	-0.00920765	0.156561	0.0985877	0.264356
Tup.690	chrXI	7610	8990	1380		0.749028	0.708174	1.45538	2.572		Intergenic	4				6565.29	1.72595	1.23946e-12		7505.97	1.89037	1.19152e-22		2935.94	-0.0782571	0.99407		11813.1	0.222126	0.229853			YKL221W	8.3811	-0.0835739	0.61989	-0.83058	-0.127117		YKL220C	211.967	0.237279	0.0170635	0.0287005	-0.191515
Tup.691	chrXI	20490	22040	1550		1.19029	0.928695	1.31389	1.82848		Intergenic	4				3882.98	0.525578	0.00898129		4488.16	0.824743	3.15131e-05		3025.19	-0.118273	0.99407		5580.46	0.310795	0.0529871			YKL218C	146.273	-0.345204	1.86194	-0.0430319	2.16411		YKL217W	252.359	3.22075	2.79337	0.319794	-0.107592
Tup.692	chrXI	38720	39050	330		0.427412	0.307452	-0.809542	-0.975306		snRNA	3	SNR64			271.891	-1.14792	8.50666e-10		283.47	-1.75957	3.32986e-13		381.419	0.0664837	0.99407		161.038	-0.413258	0.113297			YKL211C	983.997	-0.526782	0.0669723	-0.0811897	0.512565		snR64	63.8082	0.0687503	-0.627983	0.297878	-0.398856
Tup.693	chrXI	46280	46900	620		0.212284	0.923698	-0.617033	-0.556332		tRNA	3				541.729	-0.850549	7.16707e-06		762.381	-1.80494	2.80033e-25		877.399	0.618972	9.51936e-05		392.006	-0.204176	0.328356			YKL209C	2309.84	-0.299791	4.12589	-4.99643	-0.570749		tT(CGU)K	#N/A	#N/A	#N/A	#N/A	#N/A
Tup.694	chrXI	67640	69320	1680		1.62198	1.49394	1.86579	1.91636		Intergenic	4	PTK1			8691.97	0.587771	0.0181418		7798.88	0.362413	0.124608		6489.71	-0.166232	0.99407		10388.2	-0.263778	0.0973016			YKL201C	270.036	1.05856	0.615982	0.0578335	-0.384748		YKL198C	458.193	0.753863	0.577281	0.152386	-0.0241962
Tup.695	chrXI	70460	71200	740		-0.352356	-0.34263	0.423465	1.32154		ORF	7	PEX1			852.122	1.08895	7.79494e-05		1264.17	1.4752	1.69691e-07		572.482	0.129732	0.99407		1630.3	0.662217	6.01712e-05			PEX1	572.323	-0.0918392	-0.152793	-0.0178605	-0.0788141		0	#N/A	#N/A	#N/A	#N/A	#N/A
Tup.696	chrXI	74540	74800	260		0.697542	0.509896	-0.286442	-0.448965		tRNA	8	tN(GUU)K			266.041	-0.986781	2.45494e-07		246.004	-1.35814	3.89498e-13		333.36	-0.144676	0.99407		171.107	-0.386288	0.0842608			YKL197C	572.323	-0.0918392	-0.152793	-0.0178605	-0.0788141		tN(GUU)K	#N/A	#N/A	#N/A	#N/A	#N/A
Tup.697	chrXI	91700	93060	1360		0.0420626	-0.0447454	3.01898	2.80248		Intergenic	6	MTR2			7511.68	3.63756	2.37182e-108		5864.33	3.00697	4.09894e-43		1137.49	0.058259	0.99407		13153.1	-0.427522	0.00368324			YKL187C	476.653	2.76877	2.09238	0.0639782	-0.612418		YKL186C	255.853	-0.0596627	-0.061786	0.118421	0.116298
Tup.698	chrXI	93480	94150	670		1.40796	1.25235	1.84153	1.83498		Intergenic	4	MTR2			2932.24	0.540088	0.0270035		2516.22	0.420346	0.0299337		2144.63	-0.293106	0.99407		3435.97	-0.284954	0.0797568			YKL186C	255.853	-0.0596627	-0.061786	0.118421	0.116298		YKL185W	1169.22	0.475436	0.567196	0.122015	0.213775
Tup.699	chrXI	99180	100220	1040		1.06017	1.02763	1.7009	1.80706		Intergenic	4	LOT5			2863.09	0.654513	0.000124109		3008.72	0.481028	0.00745878		2228.06	0.0279894	0.99407		3791.92	-0.0150942	0.936323			YKL183W	231.439	-0.216246	-0.466757	-0.107014	-0.357525		YKL182W	37572.8	-0.262975	-0.0280213	-0.165902	0.0690518
Tup.700	chrXI	109300	110120	820		0.426911	0.32228	-0.723897	-1.09983		ORF	3	RPL17A			638.686	-1.18215	5.42497e-08		617.143	-1.85538	1.96879e-12		873.165	-0.0295336	0.99407		354.824	-0.572296	0.0292068			RPL17A	6993.95	-0.356189	-0.496057	-0.0709492	-0.210818		0	#N/A	#N/A	#N/A	#N/A	#N/A
Tup.701	chrXI	140660	141200	540		0.619729	0.579013	0.418121	0.0788954		tRNA	8				639.937	-0.292639	0.0789424		590.956	-0.763404	2.84588e-08		682.425	-0.0708634	0.99407		547.055	-0.407208	0.0178542			YKL165C	2628.81	0.408735	0.116109	0.0161584	-0.276467		tE(UUC)K	5.18977	-0.175584	-0.986608	0.100125	-0.710899
Tup.702	chrXI	142910	144390	1480		0.545805	0.457601	2.29234	2.54299		Intergenic	6				7687.87	2.7508	4.82146e-69		7014.21	2.43273	2.90794e-87		1967.99	-0.00905451	0.99407		13624.8	-0.191394	0.233859			YKL164C	10153.8	0.664829	0.252409	-0.0175759	-0.429996		YKL163W	1633.22	4.92782	5.85354	0.0831066	1.00883
Tup.703	chrXI	146680	147470	790		2.07349	1.89823	3.04187	2.89847		Intergenic	2				8133.76	1.41721	6.26884e-08		7271.78	1.0532	7.48659e-05		4306.68	-0.0454507	0.99407		11695.2	-0.283596	0.0463			YKL163W	1633.22	4.92782	5.85354	0.0831066	1.00883		YKL162C	70.5969	0.614199	0.898129	-0.110185	0.173746
Tup.704	chrXI	150710	151200	490		0.0723916	0.15238	0.919918	0.633349		Intergenic	7	KDX1			742.969	1.06047	6.70485e-09		634.578	0.18236	0.30746		506.732	0.146603	0.99407		906.902	-0.591728	8.7502e-05			YKL161C	583.573	1.04965	1.49849	0.181936	0.630768		YKL160W	361.759	0.0393368	0.141624	0.12376	0.226047
Tup.705	chrXI	162370	162660	290		0.656683	0.602717	-0.400683	-0.3695		tRNA	8	tR(UCU)K			283.462	-1.08712	6.13954e-09		289.971	-1.3341	5.068e-19		376.818	-0.0418018	0.99407		186.938	-0.152511	0.502759			YKL154W	188.805	-0.332644	-0.632939	0.00392771	-0.296367		tR(UCU)K	#N/A	#N/A	#N/A	#N/A	#N/A
Tup.706	chrXI	163540	164470	930		0.620864	0.667585	-0.488605	-0.867711		ORF	3	GPM1			873.898	-1.14848	3.07178e-09		870.354	-1.94824	6.80016e-19		1216.44	0.0473889	0.99407		485.804	-0.62081	0.00506317			GPM1	19540	-0.341331	-0.101992	-0.169555	0.0697831		0	#N/A	#N/A	#N/A	#N/A	#N/A
Tup.707	chrXI	164720	165300	580		0.301695	0.391142	0.424993	0.593068		ORF	7	YKL151C			654.396	0.0684052	0.623271		741.714	-0.0310153	0.849458		653.408	0.0773084	0.99407		757.542	0.11469	0.495557			YKL151C	217.086	0.573204	0.83512	-0.0705237	0.191393		0	#N/A	#N/A	#N/A	#N/A	#N/A
Tup.708	chrXI	194750	195080	330		-0.551006	-0.494473	0.229321	0.952136		ORF	7	RMA1			279.945	0.839792	0.00376557		365.376	0.830714	0.0182361		218.566	0.221357	0.99407		445.909	0.366362	0.048774			RMA1	89.9282	-0.123528	-0.0691891	-0.17434	-0.120001		0	#N/A	#N/A	#N/A	#N/A	#N/A
Tup.709	chrXI	202990	203240	250		0.560368	0.45944	-0.20098	0.087296		tRNA	8	tK(CUU)K			290.475	-0.808036	4.23583e-06		295.228	-0.839302	1.75318e-05		352.816	-0.108927	0.99407		228.562	-0.00742009	0.97542			tK(CUU)K	#N/A	#N/A	#N/A	#N/A	#N/A		YKL127W	1435.46	-0.311974	0.267384	-0.156366	0.422993
Tup.710	chrXI	217280	217610	330		0.407403	0.407997	-0.889433	-1.22103		ORF	3	OAC1			240.491	-1.25285	1.0247e-10		249.598	-2.10523	1.0646e-20		349.459	0.102224	0.99407		127.777	-0.61805	0.0260872			OAC1	1409.11	-1.36554	-0.878212	0.0585988	0.545922		0	#N/A	#N/A	#N/A	#N/A	#N/A
Tup.711	chrXI	219770	220040	270		0.658881	0.512741	-0.480652	-0.672289		tRNA	3	tA(AGC)K1			269.83	-1.19253	1.70026e-11		248.797	-1.55049	8.90984e-14		351.909	-0.165749	0.99407		157.238	-0.397007	0.0965012			YKL119C	79.3298	-0.0488534	-0.337709	0.00386497	-0.284991		tA(AGC)K	#N/A	#N/A	#N/A	#N/A	#N/A
Tup.712	chrXI	229860	231850	1990		2.50348	2.2543	3.23882	3.29231		Intergenic	2	KTI12			30063.9	0.681642	0.0168797		27737.2	0.618827	0.0466393		21205.8	-0.216173	0.99407		38167.2	-0.152227	0.354552			YKL110C	330.171	0.312932	0.0983255	0.20642	-0.00818713		YKL109W	674.904	0.53706	0.902761	-0.0991071	0.266593
Tup.713	chrXI	245480	246060	580		-0.121392	-0.143683	0.652081	1.83158		Intergenic	5	LAP4			751.491	1.0811	9.02422e-06		1403.43	2.02078	1.20836e-12		489.961	0.0389587	0.99407		1768.86	1.12829	9.78359e-10			YKL104C	8404.78	0.46991	1.43308	0.0122449	0.975418		YKL103C	414.682	0.270194	0.578922	-0.201777	0.106951
Tup.714	chrXI	246150	246450	300		-0.34241	-0.328203	-0.760293	-0.716833		ORF	3	LAP4			167.389	-0.381961	0.0689618		190.323	-0.785324	0.00325191		202.278	0.188894	0.99407		153.647	-0.0811596	0.753409			LAP4	#N/A	#N/A	#N/A	#N/A	#N/A		0	#N/A	#N/A	#N/A	#N/A	#N/A
Tup.715	chrXI	248230	248600	370		0.132865	0.157616	-0.106481	0.963743		Intergenic	7				339.764	-0.163884	0.342275		545.824	0.529783	0.000420702		379.039	0.162862	0.99407		520.066	0.994346	3.34787e-10			YKL103C	414.682	0.270194	0.578922	-0.201777	0.106951		YKL101W	1707.73	0.110425	0.127613	0.0423876	0.0595757
Tup.716	chrXI	258200	262060	3860		1.16078	1.09384	1.44754	1.48391		Intergenic	4	CWP1			19003.3	0.764451	0.00146266		17560	0.541712	0.0203805		13372.6	-0.119918	0.99407		24155	-0.213167	0.160817			YKL096W-A	19376.9	0.667081	1.23819	0.161253	0.73236		YKL096W	5176.71	2.01749	1.82439	-0.0730898	-0.26619
Tup.717	chrXI	283310	284260	950		0.406415	0.297217	-0.790186	-1.06973		Intergenic	3	TEF4			689.971	-1.12525	3.83997e-10		666.992	-1.75266	6.79756e-14		930.102	-0.0333714	0.99407		398.751	-0.531204	0.0213711			snR38	61.4423	0.220311	-0.195566	0.08753	-0.328346		YKL080W	2804.53	0.0797064	0.14456	-0.106505	-0.0416517
Tup.718	chrXI	299170	299420	250		-0.57392	-0.478372	0.380064	0.965704		Intergenic	7				248.237	1.08802	2.48262e-05		325.425	0.950984	0.00392699		179.234	0.315525	0.99407		413.434	0.332556	0.104043			YKL073W	1323.37	0.122332	-0.319243	0.122099	-0.319476		YKL072W	241.186	0.0693593	-0.309806	0.0663381	-0.312827
Tup.719	chrXI	302830	303090	260		0.639108	0.4914	-0.285642	-0.201127		tRNA	8	tW(CCA)K			271.901	-0.932596	1.36455e-06		263.681	-1.10996	2.46604e-10		338.128	-0.134033	0.99407		191.306	-0.177485	0.435562			YKL072W	241.186	0.0693593	-0.309806	0.0663381	-0.312827		tW(CCA)K	#N/A	#N/A	#N/A	#N/A	#N/A
Tup.720	chrXI	308060	308360	300		0.629583	0.52052	-0.213533	-0.20492		tRNA	8	tV(AAC)K1			314.433	-0.893963	5.98632e-09		315.26	-1.11885	3.69013e-12		396.116	-0.068939	0.99407		226.347	-0.163317	0.438438			YKL069W	175.403	-0.175135	-0.0680992	0.09504	0.202076		tV(AAC)K	#N/A	#N/A	#N/A	#N/A	#N/A
Tup.721	chrXI	308670	308960	290		0.0718207	0.115934	0.286824	0.892972		Intergenic	7				405.411	0.428828	0.0428751		489.689	0.348462	0.121887		365.651	0.15936	0.99407		547.823	0.225063	0.255333			tV(AAC)K	#N/A	#N/A	#N/A	#N/A	#N/A		YKL068W-A	245.1	-0.157823	-0.532983	0.0965102	-0.278649
Tup.722	chrXI	321720	323240	1520		1.64537	1.62954	2.61501	3.08923		Intergenic	2				9392.56	0.852696	0.000510763		10781.8	0.989195	0.000112815		6545.63	-0.031229	0.99407		14272.4	0.233948	0.135895			YKL063C	212.47	0.469443	0.0348836	0.33836	-0.0961986		YKL062W	982.26	1.40026	1.57741	0.0102851	0.187429
Tup.723	chrXI	326190	327600	1410		0.874787	0.755749	-0.195006	-0.593876		ORF	8	FBA1			1560.05	-1.06476	2.18743e-07		1454.82	-1.71	4.81747e-21		2044.77	-0.0700996	0.99407		910.317	-0.581779	0.00249015			FBA1	75666.6	-0.109453	0.0647968	-0.143544	0.0307061		0	#N/A	#N/A	#N/A	#N/A	#N/A
Tup.724	chrXI	334210	334990	780		0.625699	0.508696	-0.56402	-0.769983		ORF	3	TMA19			710.713	-1.2255	1.01494e-11		711.774	-1.71768	2.97902e-23		982.555	-0.0166393	0.99407		408.61	-0.375913	0.0632755			TMA19	9671.75	-0.096933	0.158553	-0.302285	-0.046799		0	#N/A	#N/A	#N/A	#N/A	#N/A
Tup.725	chrXI	335490	335920	430		-0.0350481	-0.08554	0.0639887	0.833129		ORF	7	OAR1			348.323	0.133567	0.50524		495.011	0.587174	0.0166605		342.874	0.0946344	0.99407		517.711	0.693104	0.000257223			OAR1	95.2749	0.768191	0.665416	0.0541708	-0.0486042		0	#N/A	#N/A	#N/A	#N/A	#N/A
Tup.726	chrXI	340610	341090	480		0.973907	0.808306	0.971233	1.35363		Intergenic	1	SFK1			951.024	0.0646683	0.678847		1021.92	0.303374	0.0114511		870.516	-0.172753	0.99407		1136.13	0.198227	0.211956			YKL052C	187.644	0.224712	-0.0974076	0.115435	-0.206685		YKL051W	284.614	1.27626	1.69381	0.249291	0.66684
Tup.727	chrXI	354780	356700	1920		3.24081	3.04198	3.33076	3.45099		Intergenic	2	PHD1	PRI2		43070.1	0.490003	0.114326		38866.5	0.346877	0.262443		33007.8	-0.20331	0.99407		50663	-0.220635	0.171779			YKL045W	238.67	-0.395197	-0.30724	-0.0953932	-0.00743671		YKL043W	944.206	0.442732	-0.0675723	0.0736239	-0.436681
Tup.728	chrXI	364350	365210	860		0.91127	0.729357	-0.511417	-0.306728		snRNA	8				872.73	-1.40405	3.1784e-13		929.133	-1.45298	3.05095e-16		1237.16	-0.0455114	0.99407		526.463	0.0356054	0.869693			YKL039W	1971.34	0.0923656	0.427326	-0.132505	0.202456		snR69	49.7278	-0.569424	-0.5579	0.0224393	0.0339632
Tup.729	chrXI	368730	369790	1060		-0.327664	-0.198528	1.08276	2.48301		ORF	5	AIM26	RGT1		1353.61	1.71689	1.58907e-14		3293.48	2.77035	2.86549e-23		692.588	0.252991	0.99407		4220.1	1.45251	1.19565e-22			AIM26	5.4921	0.662322	1.04264	-0.249571	0.130744		RGT1	995.954	0.0218903	0.110787	-0.0415221	0.0473743
Tup.730	chrXI	381660	382320	660		0.0992676	0.24922	1.42235	1.68802		Intergenic	5	IXR1			1318.28	1.54197	6.84203e-28		1375.05	1.1969	6.20588e-19		710	0.15537	0.99407		2095.2	-0.0522286	0.739062			YKL032C	476.614	0.231932	-0.502083	0.184211	-0.549803		YKL029C	2548.05	0.845215	0.624338	0.351838	0.130961
Tup.731	chrXI	384930	385770	840		0.198478	0.168549	0.428145	0.489176		Intergenic	7				1151.19	0.339248	0.029933		1136.54	-0.0636822	0.685401		1026.19	0.036993	0.99407		1293.66	-0.226408	0.128785			YKL029C	2548.05	0.845215	0.624338	0.351838	0.130961		YKL028W	490.047	-0.040646	-0.256971	0.022844	-0.193481
Tup.732	chrXI	428550	429140	590		0.974906	0.863384	0.262147	1.48174		Intergenic	1	LAC1			1108	-0.777713	1.66856e-05		1624.9	0.273289	0.133163		1351.93	-0.07336	0.99407		1401.97	1.11001	1.27019e-11			YKL008C	1408.34	0.63925	0.936997	-0.246621	0.0511262		YKL007W	474.579	-0.138172	-0.00341098	0.0547647	0.189526
Tup.733	chrXI	430780	431270	490		0.433735	0.272197	-0.879934	-1.06102		snRNA	3	SNR87			410.056	-1.23799	1.64587e-08		405.395	-1.78226	3.67516e-17		567.213	-0.0271321	0.99407		230.344	-0.439957	0.0867586			YKL006C-A	191.654	-0.349796	-0.532422	0.0609753	-0.12165		snR87	78.4685	-0.316283	-0.381643	0.0382285	-0.0271316
Tup.734	chrXI	432000	432660	660		0.411888	0.227541	-0.947207	-1.1951		ORF	3	RPL14A			501.342	-1.23322	8.75126e-13		483.161	-1.81165	1.08742e-10		685.689	-0.0580297	0.99407		276.973	-0.510988	0.0521085			RPL14A	3459.85	-0.210658	-0.195623	-0.249673	-0.234639		0	#N/A	#N/A	#N/A	#N/A	#N/A
Tup.735	chrXI	458460	458770	310		0.671932	0.398555	-0.284687	-0.20009		tRNA	8	tL(CAA)K			313.116	-0.925813	2.69322e-07		299.012	-1.05301	8.09528e-12		383.843	-0.175129	0.99407		221.627	-0.167142	0.439509			YKR009C	99.2102	0.249032	0.790464	-0.00105603	0.540376		tL(CAA)K	#N/A	#N/A	#N/A	#N/A	#N/A
Tup.736	chrXI	463180	463900	720		0.698145	0.539043	1.18525	2.33596		Intergenic	5				1470.63	0.811889	1.36721e-08		2693.22	1.71551	3.01772e-35		1092.64	0.0867761	0.99407		3243.48	1.12408	7.22938e-13			YKR011C	153.369	0.212471	0.569998	0.0332401	0.390768		YKR013W	4101.99	0.819555	1.83394	0.0657515	1.08013
Tup.737	chrXI	513270	513530	260		0.748623	0.605031	-0.0211	0.00595		tRNA	8	tD(GUC)K			321.277	-0.787931	1.05488e-05		318.871	-0.993548	1.96651e-08		392.032	-0.0854115	0.99407		242.085	-0.158318	0.47843			YKR038C	519.694	-0.192212	-0.385778	0.15977	-0.0337963		tD(GUC)K	#N/A	#N/A	#N/A	#N/A	#N/A
Tup.738	chrXI	513930	514790	860		1.03116	0.886437	2.27748	2.32706		Intergenic	4				3748.99	1.60218	1.45229e-18		3351.39	1.33099	9.39494e-16		1774.96	-0.111051	0.99407		5645.91	-0.246442	0.139374			tD(GUC)K	#N/A	#N/A	#N/A	#N/A	#N/A		YKR039W	3049.41	-1.36617	-0.82884	0.0915686	0.628895
Tup.739	chrXI	517040	517460	420		0.646332	0.489245	2.10727	2.19605		Intergenic	6				1727.4	1.9725	2.39301e-23		1541.89	1.72412	1.38382e-20		667.696	-0.115029	0.99407		2766.98	-0.231522	0.143832			YKR039W	3049.41	-1.36617	-0.82884	0.0915686	0.628895		tA(AGC)K	#N/A	#N/A	#N/A	#N/A	#N/A
Tup.740	chrXI	517780	520340	2560		1.29332	1.11311	1.1439	1.27277		ORF	1	UTH1	YKR041W		12555.5	-0.0968752	0.728305		12320.7	-0.115506	0.655884		12154.2	-0.159307	0.99407		12937.5	-0.0500943	0.770045			UTH1	8786.4	0.0952509	0.692451	-0.0424495	0.554751		YKR041W	62.1727	-0.0407716	0.167248	-0.289828	-0.0818091
Tup.741	chrXI	533620	533950	330		-0.399082	-0.1112	-0.276624	0.999733		Intergenic	7				229.988	0.151581	0.597573		390.189	0.777619	0.00194094		238.296	0.237878	0.99407		396.6	1.0174	2.63241e-07			YKR052C	176.049	0.18544	0.185587	-0.121172	-0.121025		YKR053C	233.829	1.3986	2.31139	-0.255948	0.656841
Tup.742	chrXI	535390	535870	480		-0.614185	-0.31887	0.571454	0.844343		ORF	7	DYN1			487.406	1.42454	5.82583e-06		559.91	1.01643	0.00336503		298.66	0.317565	0.99407		790.215	0.055482	0.81285			DYN1	1719.14	-0.0666373	-0.172027	-0.0769512	-0.182341		0	#N/A	#N/A	#N/A	#N/A	#N/A
Tup.743	chrXI	552320	552760	440		0.0205623	0.147249	0.785528	1.30124		Intergenic	7	RPS21A			588.685	1.1216	2.19319e-09		713.489	1.18702	2.02228e-11		380.191	0.0769272	0.99407		971.757	0.279452	0.117724			YKR057W	1450.12	-0.0920387	-0.325197	-0.23447	-0.467628		YKR058W	181.288	1.78564	2.05826	-0.0340611	0.238565
Tup.744	chrXI	558830	559360	530		0.463795	0.307022	-0.346342	-0.814777		ORF	3	KTR2	SNR42		454.754	-0.649626	8.00952e-05		398.7	-1.384	1.12242e-09		533.4	-0.100899	0.99407		310.203	-0.703942	0.00135789			KTR2	349.095	0.260481	1.61567	0.0519787	1.40717		SNR42	553.667	0.0342302	0.332576	-0.0654304	0.232915
Tup.745	chrXI	567090	567700	610		0.211402	0.269456	1.01992	1.85108		Intergenic	5	CCP1			836.088	1.00784	1.00213e-11		1302.78	1.47805	4.24459e-16		584.597	0.15506	0.99407		1638.9	0.765179	2.87243e-06			YKR066C	1489.83	0.460853	0.63674	-0.0606324	0.115254		YKR067W	781.746	0.506851	0.516785	-0.196157	-0.186223
Tup.746	chrXI	578780	579220	440		0.906732	0.736205	-0.0127702	0.0321688		tRNA	8	AIM29	tK(UUU)K		504.378	-0.81804	1.92351e-05		498.173	-0.998346	1.75856e-11		616.14	-0.103514	0.99407		376.401	-0.148395	0.443163			YKR072C	834.694	-0.222627	-0.356212	0.0201161	-0.113469		tK(UUU)K	#N/A	#N/A	#N/A	#N/A	#N/A
Tup.747	chrXI	580860	582010	1150		1.22491	1.13848	1.84815	2.39004		Intergenic	4				4054.73	0.571157	0.0081028		4590.57	0.860871	1.56631e-05		3073.64	-0.144211	0.99407		5815.84	0.274944	0.0629516			YKR075C	170.634	0.706839	1.21365	0.242058	0.748866		YKR076W	282.757	1.48497	1.75481	-0.150659	0.119176
Tup.748	chrXI	589900	590260	360		0.737853	0.737758	-0.563117	-0.572719		Intergenic	3				359.967	-1.35567	6.95748e-12		394.843	-1.79626	2.63064e-14		531.055	0.0950653	0.99407		204.496	-0.220513	0.408473			YKR079C	721.305	-0.280014	-0.287937	0.00231401	-0.00560839		YKR080W	189.726	-0.141488	0.571729	-0.152183	0.561034
Tup.749	chrXI	611070	611760	690		0.311235	0.305923	-0.111228	-0.0810953		Intergenic	8	SRL3			713.171	-0.219302	0.210721		720.385	-0.667837	2.9537e-06		777.066	0.0524575	0.99407		657.074	-0.26408	0.136132			YKR090W	660.438	-0.151085	-0.222319	-0.0240934	-0.0953276		YKR091W	313.495	0.412725	1.51877	0.112879	1.21893
Tup.750	chrXI	613080	613480	400		0.531664	0.417928	0.796228	0.542554		ORF	1	SRP40			520.989	0.462909	0.0181387		457.662	-0.17265	0.249421		435.102	-0.00260462	0.99407		560.909	-0.507824	0.0156558			SRP40	1547.36	-0.0760393	-0.706842	-0.0633905	-0.694193		0	#N/A	#N/A	#N/A	#N/A	#N/A
Tup.751	chrXI	614290	616050	1760		1.0295	0.859473	0.618507	0.837674		Intergenic	1	PTR2			3504.48	-0.364923	0.0395344		3556.24	-0.31204	0.0330882		3718.95	-0.149141	0.99407		3372.51	0.0308121	0.85381			YKR092C	1547.36	-0.0760393	-0.706842	-0.0633905	-0.694193		YKR093W	9371.21	0.35447	0.423555	-0.111691	-0.0426063
Tup.752	chrXI	630330	630920	590		1.67732	1.56515	1.93495	2.08848		Intergenic	4	YKR096W			2787.93	0.53357	0.0252527		2706.98	0.527644	0.0299238		2119.52	-0.180714	0.99407		3515.6	-0.0603948	0.742303			YKR096W	871.886	0.16689	0.216076	-0.0152581	0.0339281		YKR097W	186.343	2.66922	3.78987	-0.0329559	1.08769
Tup.753	chrXI	644790	646150	1360		1.57649	1.35295	4.21111	4.38553		ORF	2	FLO10			26392.9	2.94917	4.26528e-27		22119.3	2.70344	7.76149e-30		5627.17	-0.180006	0.99407		45928	-0.295153	0.0841198			FLO10	592.958	1.96589	2.78434	-0.0719868	0.746461		0	#N/A	#N/A	#N/A	#N/A	#N/A
Tup.754	chrXI	660460	661190	730		-0.00292248	0.029783	2.26563	2.6324		Intergenic	6				3014.02	3.25959	3.93087e-49		2968.37	2.96396	6.46813e-69		586.18	0.0891609	0.99407		5788.29	-0.0601818	0.767736			YKR105C	7.4968	1.39894	1.40218	-0.219883	-0.216649		YKR106W	20.4757	0.781654	1.21526	-0.0355939	0.398012
Tup.755	chrXII	13570	14160	590		-0.0504129	0.0429936	1.78307	2.44744		Intergenic	5				1421.11	2.31442	3.09204e-39		2038.54	2.58378	1.41969e-35		498.699	0.134713	0.99407		3167.97	0.547165	0.00130438			YLL064C	#N/A	#N/A	#N/A	#N/A	#N/A		YLL063C	104.715	-0.0298781	0.337766	-0.0560144	0.31163
Tup.756	chrXII	17750	18030	280		0.24775	0.369286	0.780346	0.675107		Intergenic	7	MMP1			363.511	0.809962	8.27712e-07		352.928	-0.0170123	0.925418		290.775	0.273618	0.99407		439.349	-0.417501	0.0149001			YLL062C	146.278	-0.364079	0.217729	-0.200808	0.381		YLL061W	635.301	-0.728464	-0.119752	-0.317972	0.290739
Tup.757	chrXII	22660	22940	280		0.2545	0.322304	0.182036	0.706157		Intergenic	7	GTT2			276.76	-0.038479	0.836652		343.674	0.145977	0.408666		285.962	0.0646588	0.99407		341.959	0.385268	0.0467385			YLL060C	83.5069	0.203359	0.318456	0.0346265	0.149723		YLL058W	337.171	0.744291	0.960456	-0.137952	0.0782129
Tup.758	chrXII	29360	30030	670		-0.136866	0.0227246	1.84945	2.43026		ORF	5	YCT1	YLL056C		1825.54	2.64417	3.77367e-37		2401.23	2.73522	7.77191e-32		532.681	0.155644	0.99407		3957.81	0.391644	0.0193156			YCT1	751.715	4.0236	4.27361	-0.237759	0.0122511		YLL056C	90.9222	0.431126	0.58259	-0.0673925	0.0840716
Tup.759	chrXII	35180	35520	340		-0.380724	-0.200921	0.41995	0.991671		Intergenic	7	YLL054C			302.605	1.02317	0.000117319		391.808	0.898205	0.00748165		222.738	0.288187	0.99407		493.626	0.318276	0.0838316			YLL054C	356.009	0.458714	0.725706	-0.0982871	0.168705		YLL053C	213.952	3.28945	3.61489	-0.216839	0.108601
Tup.760	chrXII	36320	37640	1320		1.0813	1.02244	2.55105	2.76242		Intergenic	6	FRE6			7327.38	1.83683	1.89254e-18		7755.12	1.80572	1.24355e-18		3130.84	-0.0377008	0.99407		12708.4	0.0613055	0.719198			YLL052C	165.5	2.89271	3.09783	-0.175479	0.0296386		YLL051C	1157.66	0.307856	0.21227	-0.00148882	-0.0970756
Tup.761	chrXII	47550	48540	990		0.654213	0.475854	-0.538383	-0.820473		ORF	3	RPL8B			850.495	-1.16892	2.68123e-10		835.356	-1.70834	2.56111e-15		1156.38	-0.0315886	0.99407		493.371	-0.441682	0.0437593			RPL8B	11232.5	-0.13424	-0.461215	-0.0112627	-0.338238		0	#N/A	#N/A	#N/A	#N/A	#N/A
Tup.762	chrXII	65380	65790	410		1.10976	0.928395	0.936258	0.400457		ORF	1	ENT4			753.713	0.0237136	0.91294		612.41	-0.843998	1.81699e-06		722.578	-0.0746071	0.99407		647.635	-0.811567	5.06117e-07			ENT4	159.112	-0.163879	-0.637938	0.0935307	-0.380528		0	#N/A	#N/A	#N/A	#N/A	#N/A
Tup.763	chrXII	83480	84570	1090		2.20966	1.99439	1.94773	2.12641		Intergenic	4	FRA1			7253.9	-0.490511	0.0766472		6759.72	-0.577018	0.0386396		7813.19	-0.205952	0.99407		6200.78	-0.169949	0.313964			YLL029W	1098.83	0.196626	0.215412	-0.095021	-0.076235		YLL028W	2750.81	1.30336	1.77442	-0.114735	0.356326
Tup.764	chrXII	86780	87260	480		1.72401	1.72178	0.324437	0.344697		Intergenic	1	TPO1			1289.96	-1.67677	5.11919e-14		1270.49	-1.84824	3.07512e-14		1862.61	-0.124259	0.99407		629.954	-0.171919	0.298177			YLL028W	2750.81	1.30336	1.77442	-0.114735	0.356326		YLL027W	269.052	0.295933	0.664034	0.0893661	0.457467
Tup.765	chrXII	92440	92740	300		0.70176	0.55952	-0.0575267	0.0505433		tRNA	8	tP(UGG)L			343.655	-0.680881	0.000508704		331.761	-0.950991	2.72641e-08		405.552	-0.101036	0.99407		264.607	-0.235389	0.259153			YLL026W	2483.16	0.336699	0.776738	-0.159099	0.28094		tP(UGG)L	#N/A	#N/A	#N/A	#N/A	#N/A
Tup.766	chrXII	93780	94600	820		-0.549776	-0.42551	1.66039	2.77356		ORF	5	PAU17			1760.03	2.59204	9.77448e-18		3236.92	3.19998	2.70345e-21		535.001	0.177986	0.99407		4791.9	0.929719	5.78276e-06			PAU17	83.1912	-0.233461	0.871847	-0.255641	0.849666		0	#N/A	#N/A	#N/A	#N/A	#N/A
Tup.767	chrXII	96700	97830	1130		0.430623	0.361328	-0.40061	-0.823366		Intergenic	3	SSA2			1035.85	-0.74948	2.08978e-07		1038.87	-1.61936	1.52864e-13		1347.94	0.115265	0.99407		691.99	-0.621759	0.000916296			YLL024C	25287.1	-0.30498	-0.442572	-0.175812	-0.313404		YLL023C	318.226	0.436447	0.715027	-0.325591	-0.0470108
Tup.768	chrXII	108340	108900	560		0.873385	0.693296	0.0321882	0.222462		Intergenic	8	COX19			758.899	-0.657211	1.07298e-05		778.874	-0.85853	7.32325e-08		909.932	-0.0364859	0.99407		617.444	-0.11018	0.541644			YLL019C	836.162	0.758542	0.714216	-0.0803153	-0.124641		YLL018C-A	112.847	0.53343	0.425243	0.134533	0.0263455
Tup.769	chrXII	109120	109490	370		-0.133481	-0.164089	0.203581	0.613646		Intergenic	7				321.925	0.250547	0.332076		380.135	0.368429	0.190019		295.718	0.0119304	0.99407		419.963	0.276963	0.1719			YLL018C-A	112.847	0.53343	0.425243	0.134533	0.0263455		YLL018C	4583.52	-0.191952	-0.0366063	-0.0522274	0.103118
Tup.770	chrXII	125080	125490	410		0.326519	0.463584	0.00889974	0.605183		Intergenic	8				544.288	-0.24681	0.0684472		688.943	-0.184708	0.156212		621.613	0.160117	0.99407		616.858	0.355457	0.0292068			YLL013C	929.929	0.158441	0.16205	-0.0193599	-0.0157506		YLL012W	709.705	0.421422	0.883503	-0.012843	0.449239
Tup.771	chrXII	125660	126030	370		0.328249	0.247235	0.610857	1.24116		ORF	7	YEH1			465.269	0.401714	0.0103818		606.087	0.755901	1.20849e-05		401.857	0.0142398	0.99407		696.537	0.508941	0.00247291			YEH1	709.705	0.421422	0.883503	-0.012843	0.449239		0	#N/A	#N/A	#N/A	#N/A	#N/A
Tup.772	chrXII	136400	136870	470		-0.0915197	-0.143568	1.52782	-0.007313		ORF	7	MMM1	YLL006W-A		978.765	1.90573	2.99999e-16		413.826	-0.181687	0.509677		402.974	-0.0697961	0.99407		1044.31	-2.00978	1.2754e-32			MMM1	485.541	-0.107238	-0.104704	-0.0749472	-0.0724124		YLL006W-A	#N/A	#N/A	#N/A	#N/A	#N/A
Tup.773	chrXII	170250	171230	980		0.42486	0.348902	0.624754	2.10779		Intergenic	5				1246.25	0.335124	0.0114031		2260.46	1.4471	4.07711e-23		1090.92	-0.0136156	0.99407		2535.34	1.23848	2.16609e-17			YLR012C	4.20676	1.76092	2.08217	0.113563	0.434807		YLR013W	#N/A	#N/A	#N/A	#N/A	#N/A
Tup.774	chrXII	187190	188110	920		1.41426	1.24758	3.28771	2.97647		ORF	2	UBR2			7986.97	2.63625	8.14166e-46		5671.62	1.87623	8.50332e-19		2182.93	-0.0104449	0.99407		12274.6	-0.640976	6.55417e-06			UBR2	614.624	-0.25259	-0.312229	-0.138859	-0.198497		0	#N/A	#N/A	#N/A	#N/A	#N/A
Tup.775	chrXII	198120	198390	270		0.560759	0.483563	-0.691263	-0.62333		Intergenic	3				231.001	-1.14115	2.67521e-10		238.14	-1.44051	3.04211e-09		313.765	-0.0160955	0.99407		147.029	-0.191504	0.490645			YLR027C	3598.17	-0.224755	0.375786	-0.13538	0.465161		snR30	8703.07	-0.0259244	0.24102	0.042269	0.309213
Tup.776	chrXII	198630	199660	1030		0.894097	0.746138	-0.354223	-0.406091		snRNA	8	ADE16	SNR30		1034.89	-1.22148	5.58367e-13		1040.29	-1.55723	8.40308e-21		1413.28	-0.0484843	0.99407		619.596	-0.253178	0.161136			ADE16	#N/A	#N/A	#N/A	#N/A	#N/A		SNR30	8703.07	-0.0259244	0.24102	0.042269	0.309213
Tup.777	chrXII	201750	202620	870		0.810908	0.613645	-0.520375	-0.76626		ORF	3	RPL15A			815.202	-1.23476	4.68543e-15		787.226	-1.74742	3.65838e-19		1110.58	-0.0628541	0.99407		457.148	-0.44799	0.0213109			RPL15A	5817.57	-0.428517	-0.505846	-0.0757731	-0.153102		0	#N/A	#N/A	#N/A	#N/A	#N/A
Tup.778	chrXII	204590	204990	400		-0.474037	-0.375232	1.10855	-0.132602		Intergenic	7	YLR031W			535.226	1.4682	2.22241e-10		321.905	-0.105362	0.765713		291.573	0.0654529	0.99407		591.708	-1.35835	9.563e-17			YLR031W	7.6839	1.16514	1.09366	0.299713	0.228229		YLR032W	389.205	-0.217905	-0.254382	-0.100332	-0.136809
Tup.779	chrXII	212030	212750	720		-0.263047	-0.023094	1.65963	2.76594		ORF	5	MLH2			1887.7	2.60724	3.43092e-20		3547.52	3.10249	3.38289e-40		597.622	0.314972	0.99407		5187.51	0.959752	0.00854618			MLH2	183.012	0.425949	0.25387	0.143845	-0.0282338		0	#N/A	#N/A	#N/A	#N/A	#N/A
Tup.780	chrXII	230580	231060	480		0.0461054	0.209758	-0.526955	0.458691		ORF	7	YLR042C			416.359	-0.588811	0.00104837		628.306	-0.252686	0.0941332		555.124	0.296743	0.99407		488.496	0.770553	9.39902e-06			YLR042C	198.647	0.360585	2.71983	0.155968	2.51521		0	#N/A	#N/A	#N/A	#N/A	#N/A
Tup.781	chrXII	232150	234310	2160		0.826503	0.724527	-0.171046	-0.338659		ORF	8	PDC1			2573.15	-1.05237	1.1356e-07		2436.07	-1.51983	1.34979e-18		3340.13	-0.0904066	0.99407		1581.45	-0.423845	0.0115674			PDC1	231579	0.0516302	0.222398	-0.274139	-0.103371		0	#N/A	#N/A	#N/A	#N/A	#N/A
Tup.782	chrXII	234450	235030	580		0.758997	0.620575	0.849878	1.20948		Intergenic	1	STU2			1246.93	0.174366	0.202547		1343.52	0.180087	0.219388		1145.21	-0.0421199	0.99407		1486.63	0.0964621	0.552016			YLR044C	231579	0.0516302	0.222398	-0.274139	-0.103371		YLR045C	762.825	-0.0265596	-0.291351	0.11875	-0.146042
Tup.783	chrXII	242550	242910	360		0.264619	0.4277	-0.855361	-1.01246		ORF	3	RPS0B			260.316	-1.21152	2.35431e-08		286.347	-1.80799	9.97423e-13		379.83	0.138553	0.99407		153.131	-0.325709	0.255333			RPS0B	20880.5	-0.0118984	-0.0797858	-0.0845947	-0.152482	2 peaks, 1 ORF	0	#N/A	#N/A	#N/A	#N/A	#N/A
Tup.784	chrXII	243060	243320	260		0.3949	0.226123	-0.502365	-0.932427		ORF	3	RPS0B			210.595	-0.959234	2.44353e-08		197.25	-1.63957	1.22175e-07		271.442	-0.0535288	0.99407		128.98	-0.609382	0.0425705			RPS0B	20880.5	-0.0118984	-0.0797858	-0.0845947	-0.152482	2 peaks, 1 ORF	0	#N/A	#N/A	#N/A	#N/A	#N/A
Tup.785	chrXII	248360	248700	340		-0.635088	-0.389532	-0.879535	1.24676		Intergenic	7	OSW2			188.541	-0.420622	0.291274		452.204	1.21359	0.000264505		230.446	0.170099	0.99407		426.532	1.95732	1.27709e-24			YLR053C	#N/A	#N/A	#N/A	#N/A	#N/A	2 peaks, 1 IG	YLR054C	21.6939	-0.00832538	1.45741	0.136121	1.60186
Tup.786	chrXII	253200	253770	570		1.48598	1.32799	0.716746	1.40287		Intergenic	1				1405.43	-0.694622	8.90639e-05		1690.23	-0.387294	0.0677004		1718.86	-0.00443624	0.99407		1369.85	0.429534	0.00537815			YLR055C	389.976	-0.196905	-0.603096	-0.120435	-0.526625	2 peaks, 1 IG	YLR056W	6605.45	-0.0241083	0.0673228	-0.146499	-0.0550681
Tup.787	chrXII	259500	259980	480		0.925036	0.854224	-0.34304	-0.284993		ORF	8	REX2			645.539	-1.41321	1.6786e-11		687.164	-1.59726	2.03076e-19		927.325	-0.00797813	0.99407		375.012	-0.0614856	0.785495			REX2	352.12	-0.165996	-0.377332	0.0260857	-0.18525		0	#N/A	#N/A	#N/A	#N/A	#N/A
Tup.788	chrXII	263190	264030	840		0.504472	0.437946	-0.842721	-1.1623		ORF	3	RPL22A			673.203	-1.26864	8.85264e-12		657.842	-1.99464	8.77886e-13		942.906	-0.00538477	0.99407		355.18	-0.608686	0.0196586			RPL22A	3923.62	-0.174203	-0.598579	0.204523	-0.219853		0	#N/A	#N/A	#N/A	#N/A	#N/A
Tup.789	chrXII	282750	283850	1100		1.00034	0.776777	-0.286975	-0.47014		ORF	8	RPL10			1152.76	-1.13665	1.33656e-08		1124.39	-1.64283	6.66522e-19		1547.36	-0.0429641	0.99407		682.356	-0.41927	0.0275352			RPL10	8478.8	-0.417997	-0.344522	-0.227516	-0.154041		0	#N/A	#N/A	#N/A	#N/A	#N/A
Tup.790	chrXII	289550	290140	590		0.929899	1.0262	1.87016	1.87949		Intergenic	4				2048.63	1.44047	5.24906e-12		2023.67	1.06373	2.72463e-11		1132.88	0.10084	0.99407		3094.54	-0.1385	0.460905			YLR080W	46.0297	0.756873	1.42337	-0.170704	0.495789		YLR081W	12.8866	1.43219	1.76563	-0.206274	0.127165
Tup.791	chrXII	300370	301290	920		-0.101578	-0.0450921	-0.0690234	1.6946		ORF	7	ARP6			716.999	0.0516422	0.828803		1667.98	1.53986	5.33548e-11		734.228	0.11724	0.99407		1734.34	1.75742	1.02419e-24			ARP6	210.668	-0.222026	-0.270195	0.151048	0.10288		0	#N/A	#N/A	#N/A	#N/A	#N/A
Tup.792	chrXII	320210	320530	320		0.429138	0.388928	0.203156	0.432937		Intergenic	8	ALT1			331.306	0.061168	0.772071		354.407	-0.316741	0.0780752		337.56	0.12282	0.99407		353.421	-0.124437	0.568796			YLR089C	2756.47	0.845876	0.311135	0.0803265	-0.454415		YLR090W	320.156	0.0180468	-0.0064562	-0.146712	-0.171215
Tup.793	chrXII	340870	341630	760		0.556246	0.514073	0.819857	1.06965		Intergenic	1	YLR099W-A			1055.49	0.495653	0.00385655		1201.15	0.371053	0.00384303		905.022	0.105246	0.99407		1400.46	0.11201	0.544697			YLR099C	767.155	0.654433	0.648627	0.106482	0.100676		YLR099W-A	98.7239	-0.148353	-0.254511	-0.128011	-0.23417
Tup.794	chrXII	343060	343380	320		-0.531628	-0.529609	-0.716863	0.926978		ORF	7	APC9			170.82	-0.120408	0.704396		329.289	1.03834	0.00724186		185.777	0.112012	0.99407		327.664	1.42632	1.17709e-09			APC9	63.5281	-0.147371	0.0602632	0.0288688	0.236503		0	#N/A	#N/A	#N/A	#N/A	#N/A
Tup.795	chrXII	365030	365280	250		0.665032	0.503284	0.81068	-0.23706		ORF	8	REX3			433.7	0.236007	0.326912		271.457	-1.07152	3.0928e-06		362.547	-0.268468	0.99407		347.672	-1.4391	7.79445e-12			REX3	152.055	0.0146052	0.244365	0.031341	0.261101		0	#N/A	#N/A	#N/A	#N/A	#N/A
Tup.796	chrXII	368120	368540	420		0.70821	0.66066	0.611911	1.03875		Intergenic	1	YLR108C			765.3	0.157595	0.365013		940.861	0.14495	0.278722		759.27	0.155681	0.99407		970.494	0.275886	0.120584			YLR108C	217.553	0.514859	0.487116	-0.349633	-0.377376		YLR109W	5575.35	0.674572	1.0093	-0.225805	0.10892
Tup.797	chrXII	369130	371500	2370		2.02188	1.86332	1.91506	1.94945		Intergenic	4	CCW12			23866.9	0.832362	0.00161248		20111.4	0.437726	0.11389		16139.2	-0.147023	0.99407		29014.1	-0.414393	0.00690688			YLR110C	73449.4	0.0839919	0.247532	-0.292323	-0.128783		YLR113W	1412.64	-0.0812149	-0.420921	0.0511854	-0.288521
Tup.798	chrXII	374200	374510	310		0.584742	0.562532	-0.274152	-0.0990419		tRNA	8	tR(ACG)L			328.035	-0.961087	1.06704e-07		336.185	-1.0061	1.53348e-09		415.601	-0.100081	0.99407		240.735	-0.0109949	0.96573			YLR113W	1412.64	-0.0812149	-0.420921	0.0511854	-0.288521		tR(ACG)L	4.28651	-0.65506	3.32635	-0.584236	3.39718
Tup.799	chrXII	388330	388960	630		-0.256624	-0.185427	0.102017	1.12532		Intergenic	7	YPS3			585.322	0.518149	0.0592511		836.1	1.06313	8.7286e-06		483.316	0.00716764	0.99407		983.289	0.696346	0.000157581			YLR120C	2753.74	1.0347	1.74149	-0.067072	0.639723		YLR121C	1674.01	1.75945	2.69836	0.0547757	0.993691
Tup.800	chrXII	390390	391030	640		1.02918	0.997997	1.50832	2.3164		Intergenic	4				1701.37	0.684665	0.00044486		2445.21	1.16916	1.14382e-14		1320	0.0595866	0.99407		2960.91	0.676131	2.50236e-05			YLR121C	1674.01	1.75945	2.69836	0.0547757	0.993691		YLR125W	147.917	0.527586	0.397128	-0.0855339	-0.215991
Tup.801	chrXII	403850	404710	860		0.302351	0.333303	1.5558	2.18479		Intergenic	5	ACE2	ZRT2		2062.28	1.75455	1.76038e-12		2562.23	1.85598	1.16576e-26		965.2	0.0803416	0.99407		3904.35	0.313426	0.417123			YLR130C	896.703	-0.264039	-0.140522	-0.0281146	0.0954024		YLR131C	410.143	-0.0591735	-0.449504	0.0342167	-0.356114
Tup.802	chrXII	410310	410590	280		-0.43245	-0.233682	-0.0161679	0.824979		ORF	7	PDC5			265.539	0.324239	0.217131		401.989	0.719288	0.036139		254.275	0.199755	0.99407		429.311	0.749602	0.000133484			PDC5	419.417	0.936589	1.99094	-0.270281	0.784068		0	#N/A	#N/A	#N/A	#N/A	#N/A
Tup.803	chrXII	423760	425040	1280		1.57871	1.45497	1.6721	2.4512		Intergenic	4	RRN5			7054.69	0.144569	0.619999		8870.41	0.535106	0.0452865		6558.06	-0.0280588	0.99407		9667.95	0.492571	0.00898438			YLR141W	192.305	0.0139175	0.0326582	-0.194716	-0.175976		YLR142W	545.737	0.789396	1.48993	-0.25715	0.443382
Tup.804	chrXII	439940	440190	250		-0.045208	-0.056588	-0.719216	-0.579188		Intergenic	3				222.365	-0.686358	0.000484326		254.096	-1.08098	2.24742e-07		291.011	0.17561	0.99407		179.992	-0.086183	0.739062			YLR149C	305.521	2.10932	2.37286	0.174467	0.438003		YLR150W	8112.55	-0.26753	-0.364862	-0.0551083	-0.152441
Tup.805	chrXII	440580	441180	600		0.49845	0.326491	-0.677178	-1.03048		ORF	3	STM1			452.287	-1.15208	1.07891e-10		461.088	-1.83282	1.6064e-12		631.852	0.0502812	0.99407		260.333	-0.497876	0.0450487			STM1	8112.55	-0.26753	-0.364862	-0.0551083	-0.152441		0	#N/A	#N/A	#N/A	#N/A	#N/A
Tup.806	chrXII	447490	449000	1510		1.86605	1.73717	0.947263	1.07842		ORF	1	RNH203			5060.44	-0.834042	0.000954135		5137.64	-0.991623	0.000102322		6268.44	-0.064062	0.99407		3818.43	-0.0941409	0.540739			RNH203	106.98	0.623295	0.741298	0.206116	0.324119		0	#N/A	#N/A	#N/A	#N/A	#N/A
Tup.807	chrXII	449150	450210	1060		3.30414	2.62218	3.49969	3.19186		Pol III	2				22414.7	0.315932	0.297764		14255.3	0.295133	0.319724		15613.5	-0.78268	0.99407		21916.1	-0.672891	2.30508e-05			tQ(UUG)L	#N/A	#N/A	#N/A	#N/A	#N/A		RDN37-1	#N/A	#N/A	#N/A	#N/A	#N/A
Tup.808	chrXII	498760	499630	870		0.784769	0.730719	-0.534813	-0.808188		ORF	3	RPS31			876.632	-1.35434	6.68386e-15		880.378	-1.93902	8.37093e-27		1250.29	-0.00163503	0.99407		462.422	-0.455452	0.0231452			RPS31	8616.84	-0.362504	-0.47431	0.0757717	-0.0360341		0	#N/A	#N/A	#N/A	#N/A	#N/A
Tup.809	chrXII	510280	510920	640		-0.452871	-0.240577	-0.380478	0.898001		ORF	7	YLR177W			417.849	0.155723	0.584067		758.394	0.862838	0.00647061		438.679	0.279477	0.99407		765.283	1.13714	1.45781e-11			YLR177W	409.013	1.10119	0.850816	0.0947436	-0.155627		0	#N/A	#N/A	#N/A	#N/A	#N/A
Tup.810	chrXII	514790	515170	380		0.671055	0.757645	-0.430916	-0.197687		Intergenic	8				467.833	-1.0727	4.35058e-09		539.619	-1.26027	3.33653e-16		655.448	0.116097	0.99407		334.62	0.0560575	0.807067			YLR179C	1606.29	0.493142	0.955531	-0.147255	0.315134		YLR180W	7394.9	0.175601	0.321543	-0.0886976	0.0572446
Tup.811	chrXII	524410	524670	260		0.453219	0.471181	0.171915	0.181435		Intergenic	8	EMG1			301.403	0.0767784	0.672008		293.695	-0.677549	5.62776e-05		307.827	0.148523	0.99407		289.514	-0.473273	0.0213109			YLR186W	531.034	-0.175273	-0.465461	-0.00323971	-0.293428		YLR187W	592.117	0.0593067	0.0187591	-0.0356296	-0.0761772
Tup.812	chrXII	534540	534800	260		-0.0265808	-0.0131846	-0.7111	-1.07055		Intergenic	3				200.989	-0.823232	0.0014547		222.544	-1.55124	2.36005e-07		276.62	0.208252	0.99407		139.385	-0.386423	0.196104			YLR189C	553.857	-0.412881	-0.242268	-0.0835379	0.0870756		YLR190W	1385.44	-0.0495206	-0.246761	-0.0565571	-0.253798
Tup.813	chrXII	541100	541630	530		-0.0718295	-0.0894459	-0.674332	-0.365733		ORF	3	YLR194C			311.67	-0.500622	0.0267005		386.406	-0.626035	0.00597595		392.084	0.203296	0.99407		303.139	0.213518	0.337867			YLR194C	1522.08	0.439632	1.32318	0.275966	1.15952		0	#N/A	#N/A	#N/A	#N/A	#N/A
Tup.814	chrXII	553660	554200	540		1.41673	1.00745	1.15553	0.253178		ORF	1	HMX1			1180.39	-0.0391204	0.871164		785.688	-0.983874	4.08074e-08		1059.93	-0.344272	0.99407		915.655	-1.15847	7.33218e-16			HMX1	193.523	0.0798736	1.06152	-0.19235	0.789294		0	#N/A	#N/A	#N/A	#N/A	#N/A
Tup.815	chrXII	565220	565570	350		0.892209	0.359057	0.531329	-0.735123		ORF	8	TUB4			491.587	-0.246038	0.291626		278.962	-1.46776	7.06788e-13		448.318	-0.536695	0.27721		323.23	-1.62288	3.07329e-18			TUB4	502.381	0.0966866	-0.096659	-0.0340555	-0.227401		0	#N/A	#N/A	#N/A	#N/A	#N/A
Tup.816	chrXII	566400	567090	690		0.626039	0.610841	1.41059	1.91639		ORF	5	CRR1			1472.07	1.08422	1.111e-11		1816.82	1.16241	2.50196e-17		970.304	0.103252	0.99407		2439.28	0.313258	0.052289			CRR1	50.6444	1.27303	1.041	-0.0959857	-0.32802		0	#N/A	#N/A	#N/A	#N/A	#N/A
Tup.817	chrXII	567980	568460	480		1.25218	0.961509	0.181455	-0.289699		Intergenic	8				836.799	-1.24464	7.02834e-08		623.039	-1.71186	4.05567e-20		1010.43	-0.448711	0.27721		425.372	-0.784005	5.29031e-05			YLR213C	50.6444	1.27303	1.041	-0.0959857	-0.32802		YLR214W	1290.73	0.341651	-0.28124	-0.414813	-1.0377
Tup.818	chrXII	592470	592720	250		0.552444	0.508408	-0.037816	0.009732		tRNA	8	tL(UAG)L1			267.418	-0.609733	0.00230251		263.237	-0.858951	1.10222e-07		311.972	-0.0756867	0.99407		215.295	-0.186713	0.409183			tL(UAG)L	#N/A	#N/A	#N/A	#N/A	#N/A	2 peaks, 1 IG	YLR228C	355.528	-0.926668	-1.01791	0.0291356	-0.0621042
Tup.819	chrXII	593370	593880	510		0.329084	0.134594	-0.00157529	0.566797		Intergenic	7				564.728	-0.325907	0.0243503		681.765	0.00583518	0.973362		617.254	-0.0398991	0.99407		638.88	0.427027	0.00996162			tL(UAG)L	#N/A	#N/A	#N/A	#N/A	#N/A	2 peaks, 1 IG	YLR228C	355.528	-0.926668	-1.01791	0.0291356	-0.0621042
Tup.820	chrXII	602260	603340	1080		0.659867	0.695677	3.01759	3.09686		Intergenic	6	ECM22			10967.7	3.32124	1.06581e-79		10114.4	2.98028	7.90623e-136		2008.15	0.040289	0.99407		20456.6	-0.1634	0.320858			YLR228C	355.528	-0.926668	-1.01791	0.0291356	-0.0621042	2 peaks, 1 IG	YLR229C	1432.93	0.072998	0.171662	-0.0316408	0.0670234
Tup.821	chrXII	603500	604120	620		-0.112987	-0.219046	1.50863	2.19938		Intergenic	5				1591.09	2.27409	7.14103e-25		2105.68	2.52756	3.57343e-21		551.525	0.0287139	0.99407		3363.45	0.433671	0.0104163			YLR228C	355.528	-0.926668	-1.01791	0.0291356	-0.0621042	2 peaks, 1 IG	YLR229C	1432.93	0.072998	0.171662	-0.0316408	0.0670234
Tup.822	chrXII	605170	605560	390		0.793241	0.717703	0.381615	0.292126		tRNA	8	tI(UAU)L			526.585	-0.340473	0.10534		517.554	-0.63094	8.56541e-06		573.123	-0.051809	0.99407		469.557	-0.204969	0.292673			YLR229C	1432.93	0.072998	0.171662	-0.0316408	0.0670234		tI(UAU)L	#N/A	#N/A	#N/A	#N/A	#N/A
Tup.823	chrXII	611020	612250	1230		1.62694	1.42089	2.95566	3.09507		ORF	2	TOP3			13268.7	1.42698	1.75616e-07		11210.9	1.1752	2.12926e-05		6632.04	-0.202071	0.99407		18855.7	-0.329043	0.0264282			TOP3	255.418	0.110917	-0.0624786	-0.17037	-0.343766		0	#N/A	#N/A	#N/A	#N/A	#N/A
Tup.824	chrXII	636390	639840	3450		0.703805	0.516422	-0.351602	-0.556876		ORF	3	YEF3			3403.16	-1.0604	1.20809e-09		3232.93	-1.50165	7.74773e-19		4420.62	-0.0944867	0.99407		2098.14	-0.404039	0.0206431			YEF3	93501.6	-0.203515	-0.158874	-0.17247	-0.127829		0	#N/A	#N/A	#N/A	#N/A	#N/A
Tup.825	chrXII	645080	646640	1560		1.05469	1.04968	1.74224	2.3674		Intergenic	4	HAP1			5704.18	0.759078	0.000150641		7387.34	1.05146	3.03514e-08		4251.28	0.0380915	0.99407		9253.51	0.459663	0.00280095			YLR254C	72.8979	0.425296	-0.0610985	0.169174	-0.31722		YLR256W	1043.03	0.0904022	-0.0228672	-0.091628	-0.204897
Tup.826	chrXII	651080	651560	480		0.271342	0.244662	0.101491	0.601824		Intergenic	7				533.187	-0.206406	0.231196		647.507	-0.0566221	0.695986		580.265	0.0543762	0.99407		609.876	0.338376	0.0492119			YLR256W	1043.03	0.0904022	-0.0228672	-0.091628	-0.204897		tA(AGC)L	#N/A	#N/A	#N/A	#N/A	#N/A
Tup.827	chrXII	659850	660640	790		-0.106745	-0.180175	1.48464	2.6062		Intergenic	5				1755.2	2.12482	1.08097e-14		3370.48	2.97921	4.38732e-43		667.531	0.0502718	0.99407		4778.47	1.0454	5.99434e-08			YLR257W	1077.89	-0.372067	0.0607613	0.134896	0.567725		YLR258W	1510.43	1.12233	1.63142	-0.0893316	0.419756
Tup.828	chrXII	673860	674340	480		0.492948	0.525323	0.185058	0.24256		Intergenic	8	RPS28B			565.28	-0.182309	0.218538		599.278	-0.664097	1.88178e-07		627.62	0.139205	0.99407		536.041	-0.207049	0.212216			YLR264C-A	#N/A	#N/A	#N/A	#N/A	#N/A		YLR265C	156.083	-0.0366343	0.106033	0.0478573	0.190524
Tup.829	chrXII	674650	675040	390		-0.0299692	-0.0705923	1.33483	1.34726		ORF	5	NEJ1			654.456	1.62981	3.1868e-11		597.144	1.15269	9.01845e-08		325.929	0.0552142	0.99407		978.11	-0.272245	0.181437			NEJ1	156.083	-0.0366343	0.106033	0.0478573	0.190524		0	#N/A	#N/A	#N/A	#N/A	#N/A
Tup.830	chrXII	677680	678240	560		0.121308	0.333895	1.86761	2.25083		Intergenic	5	BOP2			1546.81	2.1592	3.96e-35		1823.35	1.95249	2.96603e-55		617.546	0.251794	0.99407		2931.93	0.183034	0.282492			YLR266C	306.77	0.582421	0.603178	-0.00960056	0.0111563		YLR267W	166.162	3.01852	3.64071	0.482956	1.10514
Tup.831	chrXII	691240	691540	300		0.549833	0.361193	-0.737047	-0.47251		Intergenic	3	PIG1			270.366	-1.05998	3.05656e-08		300.713	-1.34772	5.2516e-10		374.905	0.0902856	0.99407		186.173	-0.0670067	0.80843			YLR273C	159.616	0.880154	0.857879	0.0465705	0.0242959		YLR274W	659.143	0.0395379	-0.0330646	-0.0589178	-0.13152
Tup.832	chrXII	704110	704760	650		1.84419	1.68304	0.82468	1.39176		Intergenic	1	YLR281C			2148.51	-0.960976	7.7448e-05		2376.98	-0.674267	0.00760977		2711.73	-0.0985205	0.99407		1776.69	0.31583	0.0503674			YLR278C	969.334	0.664431	0.246202	0.307928	-0.1103		YLR281C	27.4061	0.665581	1.23125	-0.0286925	0.536976
Tup.833	chrXII	710430	711090	660		1.99615	1.88827	0.682601	0.587574		Intergenic	1	YLR287C			1866.84	-1.23393	5.90736e-07		1918.93	-1.67291	9.10802e-11		2604.45	0.0165377	0.99407		1095.85	-0.296487	0.058668			YLR286C	7875.74	0.7601	0.60055	0.0857874	-0.0737625		YLR287C	344.471	-0.11258	-0.322449	0.111865	-0.0980032
Tup.834	chrXII	722570	723720	1150		1.58408	1.57219	2.20835	2.64492		Intergenic	4				6040.68	1.17859	6.26563e-08		6663.15	1.14341	2.67412e-08		3691.86	0.0224653	0.99407		9486.75	0.115285	0.487658			YLR295C	922.077	0.168363	0.306727	0.102482	0.240846		YLR297W	93.9986	1.71162	1.49824	0.339859	0.126488
Tup.835	chrXII	725520	725900	380		-0.339724	-0.300826	1.43069	1.77169		Intergenic	5				728.015	1.99234	8.03609e-22		764.231	1.76599	8.33977e-10		302.029	0.0855139	0.99407		1265.1	0.00408505	0.982736			YLR298C	89.9694	0.173396	0.0878662	0.204019	0.118489		YLR299W	750.558	0.653205	0.756675	-0.135181	-0.0317113
Tup.836	chrXII	727910	730150	2240		1.0011	0.90035	0.722694	0.760637		Intergenic	1	EXG1			8780.27	0.153737	0.542957		8482.03	0.050061	0.842533		7842.93	-0.138044	0.99407		9653.98	-0.113588	0.482426			YLR299W	750.558	0.653205	0.756675	-0.135181	-0.0317113		YLR300W	16996.4	0.899404	1.34906	-0.0148093	0.434844
Tup.837	chrXII	731970	732340	370		0.859859	0.63927	-0.0718703	-0.149568		tRNA	8	tL(UAG)L2			452.812	-0.779892	9.05699e-06		437.655	-1.28523	1.3347e-14		561.704	-0.030949	0.99407		317.726	-0.403113	0.0365001			YLR301W	392.017	-0.276831	-0.350906	-0.0637425	-0.137817		tL(UAG)L	#N/A	#N/A	#N/A	#N/A	#N/A
Tup.838	chrXII	737630	738180	550		2.02778	1.96767	0.560222	0.915264		Intergenic	1	STT4			2299.26	-1.58028	9.88322e-10		2393.28	-1.52248	9.91957e-09		3293.65	-0.0963846	0.99407		1289.38	0.0882367	0.604479			YLR304C	13755.6	0.810499	1.75944	-0.28527	0.663674		YLR305C	2717.24	-0.0469438	0.0504195	-0.169017	-0.0716536
Tup.839	chrXII	758870	759430	560		0.436812	0.584816	1.19867	1.82153		Intergenic	5	QNQ1			1325.41	0.831333	1.06827e-08		1676.04	1.03278	1.63869e-13		965.057	0.0593261	0.99407		2132.59	0.393019	0.00616259			YLR312C	51.9164	1.6695	2.15805	-0.0286418	0.459914		YLR312W-A	150.704	-0.501022	-0.411862	-0.0500597	0.0391005
Tup.840	chrXII	780910	781350	440		0.357611	0.373529	-0.703699	-0.967243		ORF	3	RPL38			367.481	-1.09037	4.85328e-07		373.773	-1.90421	8.51609e-20		511.604	0.0834314	0.99407		211.943	-0.59614	0.0176326			RPL38	3833.52	-0.264967	-0.466535	0.0483545	-0.153213		0	#N/A	#N/A	#N/A	#N/A	#N/A
Tup.841	chrXII	783290	784790	1500		0.211887	0.230828	1.1297	1.2799		tRNA	5				2712.38	1.41843	2.45528e-25		2546.04	0.935375	3.96239e-14		1517.56	0.0901863	0.99407		3942.54	-0.256796	0.0854873			YLR327C	311.962	3.19679	3.84552	0.28928	0.938008		tS(GCU)L	#N/A	#N/A	#N/A	#N/A	#N/A
Tup.842	chrXII	789730	790340	610		0.869062	0.774662	0.964542	1.50495		Intergenic	1				1391.1	0.115736	0.511644		1584.88	0.286829	0.0604093		1300.92	-0.0500174	0.99407		1722.89	0.251898	0.103235			YLR330W	1616.16	-0.100132	-0.202082	0.0295947	-0.0723551		YLR332W	774.268	0.415687	0.896988	0.182139	0.66344
Tup.843	chrXII	793770	795280	1510		0.765876	0.538761	-0.269853	-0.316225		tRNA/snRNA	8				1678.09	-1.02592	2.80957e-10		1627.35	-1.38578	2.96741e-25		2170.88	-0.0853486	0.99407		1082.32	-0.310868	0.0600165			tD(GUC)L	#N/A	#N/A	#N/A	#N/A	#N/A		snR61	57.2733	-0.0115276	-0.14865	0.0283124	-0.10881
Tup.844	chrXII	797030	797360	330		0.65627	0.711788	-0.218233	-0.442067		tRNA	8	tE(UUC)L			370.26	-0.955548	4.76355e-07		356.904	-1.6001	2.32299e-21		482.097	-0.0112596	0.99407		232.083	-0.524281	0.00870642			YLR333C	1614.09	-0.421324	-0.492878	-0.095349	-0.166903		tE(UUC)L	#N/A	#N/A	#N/A	#N/A	#N/A
Tup.845	chrXII	805800	806980	1180		0.772379	0.692395	-0.341645	-0.645961		ORF	3	RPP0			1176.1	-1.19682	1.42746e-11		1147.91	-1.73247	1.65875e-18		1602.04	-0.041204	0.99407		671.433	-0.447665	0.0235688			RPP0	30940	-0.0390698	-0.0131837	-0.258752	-0.232866		0	#N/A	#N/A	#N/A	#N/A	#N/A
Tup.846	chrXII	808690	810700	2010		1.37194	1.21186	0.948418	1.16824		Intergenic	1	FKS1			8388.63	-0.00173355	0.994792		9057.23	0.26262	0.299525		7836.76	-0.168096	0.99407		9865.97	0.221339	0.131931			YLR341W	11.954	0.757463	0.371138	0.39118	0.00485499		YLR342W	51048.8	0.265916	0.549068	-0.111576	0.171576
Tup.847	chrXII	818500	818820	320		0.664169	0.460953	-0.244369	-0.372297		tRNA	8	TRR4			330.355	-0.864097	2.69443e-06		313.787	-1.30025	1.53971e-17		410.811	-0.0823143	0.99407		224.877	-0.385393	0.0577382			YLR343W	116.63	0.210738	0.519586	-0.147212	0.161636		tR(CCG)L	6.14594	0.405146	-0.169951	0.0731753	-0.501923
Tup.848	chrXII	819370	819970	600		0.376379	0.176658	-0.958054	-1.26416		ORF	3	RPL26A			427.248	-1.24491	8.53331e-10		407.307	-1.71455	8.63179e-12		578.129	-0.0998406	0.99407		239.421	-0.439958	0.091098			RPL26A	3644.64	-0.175738	-0.318277	-0.0223049	-0.164845		0	#N/A	#N/A	#N/A	#N/A	#N/A
Tup.849	chrXII	827110	827500	390		-0.102874	0.0247897	-0.644918	-0.666915		ORF	3	DIC1			243.078	-0.664412	0.00550379		248.79	-1.11032	6.04289e-05		301.025	0.029453	0.99407		186.247	-0.281393	0.293167			DIC1	763.118	0.808045	0.563772	-0.0203068	-0.26458		0	#N/A	#N/A	#N/A	#N/A	#N/A
Tup.850	chrXII	827820	828440	620		0.341178	0.294872	1.1879	1.24813		Intergenic	5	DIC1			1109.5	1.36833	2.06217e-15		995.236	0.692039	1.86485e-06		649.058	0.144501	0.99407		1532.38	-0.39824	0.0262538			YLR348C	763.118	0.808045	0.563772	-0.0203068	-0.26458		YLR350W	567.133	0.459407	0.671666	0.172384	0.384643
Tup.851	chrXII	837540	839750	2210		0.968108	0.805075	-0.0269468	-0.162396		ORF	8	ILV5			2723.7	-0.880047	9.46587e-07		2627.9	-1.24081	5.08428e-14		3403.72	-0.0824809	0.99407		1876.21	-0.311271	0.0512008			ILV5	19546.5	-0.344858	0.0435233	-0.00417515	0.384206		0	#N/A	#N/A	#N/A	#N/A	#N/A
Tup.852	chrXII	851950	852390	440		-0.213178	-0.335733	1.30693	-0.235062		ORF	7	NMD4	STE11		653.347	1.74662	4.79111e-18		302.165	-0.185755	0.509677		293.596	-0.060376	0.99407		696.688	-1.8488	1.37947e-27			NMD4	203.193	-0.238498	-0.228094	0.0310878	0.0414915		STE11	220.309	0.0530834	0.209579	0.0325581	0.189053
Tup.853	chrXII	855940	856640	700		0.530596	0.4033	-0.747074	-0.90554		ORF	3	RPS22B			522.21	-1.22399	1.06729e-10		498.557	-1.64413	1.1285e-15		700.641	-0.106106	0.99407		299.166	-0.393874	0.0811937			RPS22B	2194.03	0.148129	0.0579802	0.0193323	-0.0708164		0	#N/A	#N/A	#N/A	#N/A	#N/A
Tup.854	chrXII	875240	875570	330		0.789821	0.661258	-0.0719152	-0.0393818		tRNA	8	tK(UUU)L			344.217	-0.818822	1.36504e-06		346.1	-1.08067	8.38259e-10		427.81	-0.0509898	0.99407		254.646	-0.183825	0.379358			YLR377C	17.0409	1.60166	1.96383	0.680096	1.04227		tK(UUU)L	#N/A	#N/A	#N/A	#N/A	#N/A
Tup.855	chrXII	898340	898640	300		0.36045	0.307083	-0.908313	-1.17075		ORF	3	RPS29A			212.673	-1.15723	3.54731e-08		219.796	-1.76464	9.45918e-10		297.526	0.0527769	0.99407		124.778	-0.423105	0.167117			RPS29A	1367.48	-0.481084	-0.631433	-0.0613818	-0.211731		0	#N/A	#N/A	#N/A	#N/A	#N/A
Tup.856	chrXII	899150	899540	390		0.44429	0.385833	-0.868977	-1.17814		snRNA	3	SNR34	STE23		296.406	-1.3441	1.2627e-12		281.49	-1.88722	9.81742e-14		409.463	-0.095466	0.99407		155.149	-0.509744	0.0644719			SNR34	697.512	-0.165721	0.154081	0.0956644	0.415467		STE23	#N/A	#N/A	#N/A	#N/A	#N/A
Tup.857	chrXII	903970	904220	250		0.038256	0.100656	-1.09452	-1.33843		ORF	3	CCW14			139.79	-1.26106	3.25447e-07		141.349	-1.68053	1.66796e-07		194.855	-0.033052	0.99407		80.5639	-0.318548	0.36429			CCW14	4920.22	0.456045	0.93654	-0.0113864	0.469108		0	#N/A	#N/A	#N/A	#N/A	#N/A
Tup.858	chrXII	921320	921600	280		0.424146	0.294211	-0.708075	-0.961175		ORF	3	BDF1			199.908	-1.17662	1.61232e-10		205.065	-1.6832	6.78064e-14		277.511	0.0187918	0.99407		118.775	-0.355546	0.183135			BDF1	1366.55	-0.333255	-0.963483	-0.0626613	-0.692889		0	#N/A	#N/A	#N/A	#N/A	#N/A
Tup.859	chrXII	921690	922020	330		0.429233	0.257276	-0.309288	-0.277364		Intergenic	8				315.872	-0.685203	0.000843319		362.874	-0.924432	1.63669e-07		406.56	0.132951	0.99407		265.835	0.0303408	0.897885			YLR399C	1366.55	-0.333255	-0.963483	-0.0626613	-0.692889		YLR401C	717.457	-0.187777	-0.55699	0.044909	-0.324304
Tup.860	chrXII	924520	924820	300		0.210887	0.291293	-0.110137	0.296363		Intergenic	8				324.748	-0.229342	0.271286		374.565	-0.341399	0.10865		362.471	0.0962436	0.99407		339.118	0.12588	0.507997			YLR401C	717.457	-0.187777	-0.55699	0.044909	-0.324304		YLR403W	1269.17	-0.0415858	-0.247357	0.119207	-0.0865635
Tup.861	chrXII	940940	941250	310		1.01625	0.282594	0.409458	0.0115677		Intergenic	8				462.217	-0.514733	0.044206		321.517	-0.62471	1.01018e-05		444.627	-0.633735	0.000189565		341.405	-0.59993	0.00898438			YLR410W	1752.84	-0.400925	-0.183325	-0.00893086	0.208669		YLR411W	21.7958	0.220414	0.601268	-0.0374648	0.343389
Tup.862	chrXII	949350	951930	2580		1.7031	1.54042	1.92959	2.18763		Intergenic	4	BER1	YLR413W		15888.5	0.810566	0.00233058		16722	0.925543	0.000275477		10868.2	-0.140213	0.99407		22764.2	0.104169	0.552016			YLR412C-A	#N/A	#N/A	#N/A	#N/A	#N/A		YLR413W	5991.94	0.461474	0.175203	-0.024104	-0.310376
Tup.863	chrXII	954070	955140	1070		0.641885	0.707239	2.66636	3.31532		Intergenic	6	VPS36	YLR415C		5552.43	2.75272	1.37242e-57		7490.69	2.88559	3.87237e-88		1511.34	0.166641	0.99407		12377.7	0.430031	0.0213109			YLR415C	23.0862	0.639394	1.56227	0.193457	1.11634		YLR417W	217.024	-0.136873	-0.0389117	-0.239003	-0.141042
Tup.864	chrXII	977170	977570	400		0.945811	0.452184	0.889278	-0.687469		Intergenic	8				842.516	-0.0551121	0.84992		435.662	-1.48849	9.0478e-12		713.067	-0.568645	0.316041		570.206	-1.87276	1.56526e-22			tN(GUU)L	#N/A	#N/A	#N/A	#N/A	#N/A		YLR425W	423.089	-0.0602979	-0.0457454	-0.0907474	-0.0761949
Tup.865	chrXII	1002280	1002700	420		0.601852	0.384581	-0.768037	-0.792449		Intergenic	3	IMD3			375.618	-1.27887	1.32345e-11		379.068	-1.66584	3.49997e-20		521.908	-0.0368526	0.99407		216.603	-0.291388	0.220458			YLR431C	93.913	0.125584	-0.0158288	0.23307	0.0916567		YLR432W	5290.15	0.257413	0.0792772	-0.205377	-0.383512
Tup.866	chrXII	1005690	1005940	250		-0.445828	-0.414864	0.703348	-0.701268		ORF	7	CNA1			294.606	1.30261	2.25394e-07		161.934	-0.631853	0.0732789		173.37	0.0429264	0.99407		294.543	-1.74103	1.59413e-20			CNA1	371.207	-0.197455	-0.0261975	-0.00971182	0.161546		0	#N/A	#N/A	#N/A	#N/A	#N/A
Tup.867	chrXII	1012040	1012540	500		1.11423	0.908612	0.611721	0.828325		Intergenic	1				944.45	-0.39986	0.0446222		1028.46	-0.463426	0.0073374		1065.71	0.00423249	0.99407		908.052	0.067952	0.694419			YLR437C	360.262	0.718836	0.274901	0.137142	-0.306793		YLR438W	1169.99	1.36085	1.42775	-0.136043	-0.0691439
Tup.868	chrXII	1018100	1018710	610		0.478603	0.459862	-0.685222	-1.07159		ORF	3	RPS1A			494.62	-1.16981	1.18402e-14		491.875	-1.8976	2.9997e-16		686.972	0.0269002	0.99407		276.841	-0.574623	0.0132594			RPS1A	6002.26	-0.318057	-0.43573	-0.0848524	-0.202526		0	#N/A	#N/A	#N/A	#N/A	#N/A
Tup.869	chrXII	1018880	1019170	290		0.233203	0.0808379	-0.750831	-0.619886		Intergenic	3	RPS1A			233.223	-0.896917	1.47111e-06		257.037	-1.36122	8.90877e-11		316.4	0.129706	0.99407		165.558	-0.19724	0.420868			YLR441C	6002.26	-0.318057	-0.43573	-0.0848524	-0.202526		YLR442C	430.836	-0.0153901	0.163684	-0.210334	-0.0312601
Tup.870	chrXII	1060990	1061460	470		0.327342	0.316197	1.55555	2.2448		Intergenic	5				1057.97	1.64582	1.23603e-26		1476.8	2.02333	1.11817e-24		516.588	0.0314808	0.99407		2149.76	0.552707	0.00383701			YLR460C	55.7249	0.856921	1.25213	-0.161867	0.233338	2 peaks, 1 IG	YLR461W	35.1875	0.676833	0.849123	-0.0185913	0.153699
Tup.871	chrXII	1062220	1062770	550		-0.0542282	-0.121329	1.00162	1.9717		Intergenic	5				880.179	1.38784	7.37229e-10		1443.88	2.13997	2.05558e-16		481.837	-0.0250862	0.99407		1962.12	0.867629	1.21202e-05			YLR460C	55.7249	0.856921	1.25213	-0.161867	0.233338	2 peaks, 1 IG	YLR461W	35.1875	0.676833	0.849123	-0.0185913	0.153699
Tup.872	chrXII	1063560	1063810	250		-0.213192	-0.164868	0.109332	0.748916		Intergenic	7				212.041	0.44087	0.0959602		283.56	0.769902	0.0144624		184.174	0.0578071	0.99407		324.302	0.535412	0.0072792			YLR461W	35.1875	0.676833	0.849123	-0.0185913	0.153699		YLR462W	5.3116	0.135296	-0.469562	0.408416	-0.196442
Tup.873	chrXIII	9750	10230	480		0.322751	0.442866	1.65369	2.32614		Intergenic	5				1262.82	1.92122	3.21987e-26		1641.54	2.03607	1.50967e-44		550.354	0.136814	0.99407		2505.14	0.390419	0.032836			YML132W	15.4222	-1.05017	-0.0896014	0.203638	1.16421		YML131W	891.826	2.9706	3.29314	0.196945	0.51948
Tup.874	chrXIII	16630	16950	320		-0.531553	-0.344997	-0.295991	1.1904		Intergenic	7	MSC1			207.636	0.284965	0.42111		422.082	1.2714	0.000132734		204.99	0.233796	0.99407		444.501	1.37129	3.25459e-12			YML128C	430.188	2.58961	2.14083	0.0192711	-0.429511		YML127W	757.111	0.197944	0.0163123	-0.0933615	-0.274993
Tup.875	chrXIII	23970	26780	2810		0.790065	0.696479	-0.0897362	-0.399573		Intergenic	8	PHO84			4663.86	-0.7724	1.00992e-05		4434.9	-1.24156	1.91597e-13		5706.07	-0.0623101	0.99407		3283.78	-0.402508	0.00347174			YML123C	17354.6	0.364031	0.208231	-0.149316	-0.305116		YML121W	213.62	-0.130898	0.0231475	-0.0128599	0.141186
Tup.876	chrXIII	37480	38180	700		0.509233	0.398191	2.82587	1.40676		Intergenic	6	NAB6			3921.61	2.77622	1.03196e-35		1675.73	1.11998	6.30948e-21		969.16	-0.0732762	0.99407		4938.39	-1.58621	1.53695e-19			YML117W	1791.65	0.153677	0.502115	0.0212014	0.36964		YML116W	492.617	1.30375	1.00673	-0.0964854	-0.393507
Tup.877	chrXIII	69980	70390	410		-0.154908	-0.159322	-0.189777	0.533921		ORF	7	CUE4	YML100W-A		311.527	0.0378109	0.897763		422.316	0.236798	0.404853		327.646	0.170232	0.99407		416.848	0.514117	0.0104324			CUE4	255.832	0.628535	0.282512	-0.0834121	-0.429435		YML100W-A	22.1209	0.0539169	1.1141	-0.294073	0.766115
Tup.878	chrXIII	91050	92070	1020		0.967247	0.967151	0.34598	0.638712		Intergenic	1				1653.68	-0.522506	0.000678854		1821.4	-0.515542	0.00110699		1926.12	-0.0106651	0.99407		1543.69	0.125841	0.405537			YML091C	668.294	0.441705	0.848329	-0.251047	0.155577		YML088W	475.518	0.106111	0.11153	0.0388951	0.0443141
Tup.879	chrXIII	101030	101800	770		0.408928	0.500376	2.2887	3.11187		Intergenic	6				3199.18	2.77695	7.43167e-80		4688.35	3.08617	2.10634e-105		847.39	0.125944	0.99407		7544.43	0.573375	0.000149989			YML083C	45.0824	4.21933	4.10292	0.560015	0.443606		YML082W	560.785	-0.151274	-0.514515	0.12236	-0.240881
Tup.880	chrXIII	115360	115760	400		0.444268	0.533624	0.462019	1.05737		Intergenic	1	HMG1			546.234	0.241021	0.186516		637.372	0.375208	0.0391025		497.119	-0.00330763	0.99407		708.576	0.261662	0.200705			YML076C	366.708	0.341521	0.0955133	0.122092	-0.123915		YML075C	4876.93	-0.182357	-0.0333728	-0.0437038	0.10528
Tup.881	chrXIII	119010	119660	650		1.59677	1.54857	1.01475	0.784136		Intergenic	1				1869.3	-0.614691	0.0161952		1734.87	-1.13085	2.45059e-05		2186.27	-0.0685647	0.99407		1389.39	-0.469237	0.0425705			YML075C	4876.93	-0.182357	-0.0333728	-0.0437038	0.10528		YML074C	1472.35	0.0161938	-0.176972	0.0508172	-0.142349
Tup.882	chrXIII	123500	123800	300		0.3741	0.272	-0.876633	-1.15184		ORF	3	RPL6A			224.279	-1.29398	2.62045e-12		213.203	-1.74949	1.45115e-10		305.366	-0.109868	0.99407		122.919	-0.439447	0.130398			RPL6A	4660.48	-0.18753	-0.535371	0.12446	-0.223381		0	#N/A	#N/A	#N/A	#N/A	#N/A
Tup.883	chrXIII	146710	147220	510		0.46844	0.289898	-0.801582	-1.06983		ORF	3	RPS1B			402.599	-1.17378	1.2135e-12		388.728	-1.8734	9.26346e-17		550.248	-0.0240961	0.99407		223.532	-0.593137	0.0124777			RPS1B	7052.56	-0.211679	-0.485787	0.230627	-0.0434815		0	#N/A	#N/A	#N/A	#N/A	#N/A
Tup.884	chrXIII	159020	159780	760		0.510666	0.558601	-0.422502	-0.299368		Intergenic	8	SML1			739.256	-0.808109	1.9301e-07		797.753	-1.12992	4.08372e-11		957.319	0.0645769	0.99407		560.486	-0.125935	0.526548			YML058W-A	444.17	5.79305	6.32868	0.390699	0.926327		YML058W	1413.34	0.370676	0.646182	0.150773	0.426279
Tup.885	chrXIII	167380	168340	960		-0.109672	0.00897023	1.71633	2.44275		Intergenic	5				1995.01	2.11687	6.8711e-30		2912.27	2.39986	6.6904e-24		788.79	0.151531	0.99407		4399.15	0.580177	0.000363971			YML054C-A	#N/A	#N/A	#N/A	#N/A	#N/A	2 peaks, 1 IG	tY(GUA)M	#N/A	#N/A	#N/A	#N/A	#N/A
Tup.886	chrXIII	168700	169000	300		0.661337	0.59615	-0.11316	0.205847		tRNA	8	SUP5			328.389	-0.618458	0.00015242		354.813	-0.700137	1.17266e-06		393.84	-0.00829332	0.99407		285.707	0.0456997	0.825426			YML054C-A	#N/A	#N/A	#N/A	#N/A	#N/A	2 peaks, 1 IG	tY(GUA)M	#N/A	#N/A	#N/A	#N/A	#N/A
Tup.887	chrXIII	169960	170450	490		0.478534	0.56843	-0.146969	0.267472		Intergenic	8				650.021	-0.54356	0.000283522		759.747	-0.5578	5.16557e-06		788.459	0.0787372	0.99407		617.918	0.196717	0.270522			YML053C	116.656	0.154264	-0.113298	0.352111	0.0845498		YML052W	1813.04	0.413662	0.0316098	-0.0349377	-0.41699
Tup.888	chrXIII	195980	196350	370		0.429035	0.290249	-0.592532	-0.614046		tRNA	3	SUF7			368.507	-1.02694	1.96498e-10		357.445	-1.2506	1.68417e-17		470.187	-0.122491	0.99407		245.56	-0.214444	0.28602			YML041C	69.6177	-0.049847	-0.363779	0.270053	-0.0438789		tP(UGG)M	#N/A	#N/A	#N/A	#N/A	#N/A
Tup.889	chrXIII	196560	197070	510		0.227336	0.1556	-0.0229234	0.569685		Intergenic	7				605.601	-0.293483	0.0657639		742.203	0.0296907	0.867404		661.019	-0.0161493	0.99407		697.835	0.442742	0.00781615			tP(UGG)M	#N/A	#N/A	#N/A	#N/A	#N/A		YML038C	972.929	0.0615091	0.0801526	-0.0938574	-0.075214
Tup.890	chrXIII	220080	220450	370		0.0793919	0.0973865	-0.949919	-1.07404		ORF	3	TSA1			229.691	-1.04693	6.53171e-06		253.934	-1.60348	8.23584e-08		325.172	0.146486	0.99407		148.387	-0.279011	0.372339			TSA1	6372.57	-0.0699258	-0.0740462	-0.00497151	-0.00909184		0	#N/A	#N/A	#N/A	#N/A	#N/A
Tup.891	chrXIII	220810	221280	470		0.511115	0.377215	-0.234081	0.486887		Intergenic	8				525.858	-0.667271	2.10314e-05		676.511	-0.249052	0.0657062		650.039	0.034135	0.99407		552.623	0.586927	0.000556217			YML028W	6372.57	-0.0699258	-0.0740462	-0.00497151	-0.00909184		YML027W	553.284	0.690658	0.636911	0.278758	0.22501
Tup.892	chrXIII	253280	253600	320		0.152141	0.374306	-0.0273687	-0.256631		Intergenic	8				373.552	-0.500786	0.0200036		390.958	-1.14907	1.85721e-08		459.553	0.142181	0.99407		298.169	-0.369992	0.0925722			YML007C-A	#N/A	#N/A	#N/A	#N/A	#N/A		YML007W	960.628	0.0350476	0.0460353	-0.0232481	-0.0122604
Tup.893	chrXIII	258990	259340	350		0.793337	0.719817	0.0417257	-0.0761886		tRNA	8	tS(AGA)M			476.7	-0.728917	2.63085e-05		464.787	-1.03524	1.88987e-10		574.172	-0.0776928	0.99407		358.745	-0.253561	0.169363			YML006C	351.105	-0.115114	-0.377875	0.102968	-0.159792		tS(AGA)M	#N/A	#N/A	#N/A	#N/A	#N/A
Tup.894	chrXIII	267940	268250	310		0.762594	0.898865	-0.0801548	-0.456181		Intergenic	8				391.989	-0.9582	4.39149e-07		380.902	-1.80609	1.50392e-11		521.764	0.0520712	0.99407		235.026	-0.673839	0.00480414			YML001W	316.731	-0.225901	-0.391004	-0.0221708	-0.187274		YMR001C	723.629	-0.038353	-0.262278	0.0774718	-0.146453
Tup.895	chrXIII	279690	280350	660		1.55462	1.43622	1.87262	1.84838		Intergenic	4				2989.66	0.580935	0.00682287		2737.2	0.310364	0.179543		2279.7	-0.113868	0.99407		3572.73	-0.255915	0.0931568			YMR006C	1180.97	1.22486	0.375309	-0.0977029	-0.947259	2 peaks, 1 IG	YMR008C	3602.18	1.47491	1.94668	-0.140494	0.33128
Tup.896	chrXIII	282600	284160	1560		0.230439	0.317105	2.05351	2.9426		Intergenic	6	ADI1			5209.55	2.29183	1.66788e-53		7089.02	2.5357	1.31328e-64		1812.3	0.0855367	0.99407		11206	0.4709	0.00400112			YMR008C	3602.18	1.47491	1.94668	-0.140494	0.33128	2 peaks, 1 IG	YMR009W	218.375	-0.309047	-0.375714	0.153377	0.0867096
Tup.897	chrXIII	286810	288040	1230		1.57014	1.48059	2.70461	3.00829		Intergenic	2				9942.22	0.876407	0.000897735		10603.9	0.913703	0.000334463		6759.15	-0.0714576	0.99407		14436.3	0.0944204	0.596375			YMR010W	1295.33	0.113245	0.394578	-0.144694	0.136638		YMR011W	7491.61	0.072229	0.878309	-0.52781	0.27827
Tup.898	chrXIII	290670	290990	320		0.785231	0.668344	0.00185312	-0.256884		tRNA	8	tE(UUC)M			392.027	-0.759536	4.27562e-05		364.721	-1.33532	3.91112e-12		478.161	-0.0616746	0.99407		268.88	-0.506424	0.0151745			YMR011W	7491.61	0.072229	0.878309	-0.52781	0.27827		tE(UUC)M	#N/A	#N/A	#N/A	#N/A	#N/A
Tup.899	chrXIII	296910	298830	1920		0.716506	0.574879	-0.275508	-0.526291		ORF	8				2283.01	-1.0557	3.08539e-09		2184.89	-1.48428	1.06479e-19		2969.41	-0.0857965	0.99407		1419.6	-0.382894	0.0242757			.	#N/A	#N/A	#N/A	#N/A	#N/A		0	#N/A	#N/A	#N/A	#N/A	#N/A
Tup.900	chrXIII	302600	303220	620		1.8184	1.75828	1.71632	1.53651		Intergenic	4				2767.39	-0.097535	0.671819		2446.14	-0.503431	0.0448263		2700.13	-0.138285	0.99407		2541.54	-0.420851	0.00785591			YMR015C	2989.59	-0.216853	0.372968	-0.174281	0.41554		YMR016C	677.245	1.14517	0.509759	0.413056	-0.222353
Tup.901	chrXIII	305840	307460	1620		3.21031	2.93855	3.44956	3.60058		Intergenic	2				39442.3	0.421453	0.180417		37579.3	0.360772	0.239349		31380.1	-0.172283	0.99407		47176.8	-0.106991	0.537996			YMR016C	677.245	1.14517	0.509759	0.413056	-0.222353		YMR017W	38.7906	3.2718	3.1768	0.125999	0.0309943
Tup.902	chrXIII	309380	310260	880		1.69831	1.72939	2.53339	2.80352		Intergenic	2				5908.96	0.973751	0.00038914		7141.51	0.951799	0.00055792		4148.93	0.149872	0.99407		9312.35	0.253375	0.101507			YMR017W	38.7906	3.2718	3.1768	0.125999	0.0309943		YMR018W	29.8704	1.79602	1.63295	-0.0932941	-0.256366
Tup.903	chrXIII	330360	330770	410		-0.566503	-0.45778	-0.797416	1.14263		Intergenic	7	RSF1			203.721	-0.0961715	0.777893		501.882	1.27612	0.000394134		236.846	0.312568	0.99407		488.712	1.83637	4.68775e-19			YMR029C	268.063	-0.0310653	-0.076907	-0.0226564	-0.0684981		YMR030W	77.6992	-0.225385	-0.0347155	0.0890708	0.27974
Tup.904	chrXIII	347020	347530	510		1.27252	1.17701	1.07132	1.11745		Intergenic	1				1454.72	-0.190216	0.431471		1412.61	-0.384565	0.0724148		1483.08	-0.0978702	0.99407		1399.14	-0.167631	0.327176			YMR037C	933.641	0.432469	0.00686481	0.123142	-0.302462		YMR038C	594.913	0.309446	-0.347443	0.181324	-0.475566
Tup.905	chrXIII	348300	348600	300		-0.0912833	-0.140187	0.75671	0.23233		Intergenic	7	SUB1			364.579	1.17095	5.87991e-10		297.334	0.0833345	0.794752		241.383	0.201875	0.99407		437.385	-0.73886	1.5314e-05			YMR038C	594.913	0.309446	-0.347443	0.181324	-0.475566		YMR039C	424.038	0.419212	0.448748	0.243733	0.27327
Tup.906	chrXIII	352190	352500	310		0.5869	0.600413	-0.231697	-0.248794		tRNA	8	tF(GAA)M			310.581	-0.813869	4.17081e-05		314.868	-1.12049	5.96321e-12		389.067	-0.0269893	0.99407		228.826	-0.199741	0.378013			YMR041C	118.558	0.31219	0.714517	0.014478	0.416805		tF(GAA)M	#N/A	#N/A	#N/A	#N/A	#N/A
Tup.907	chrXIII	352830	353430	600		0.111541	0.164555	0.258326	1.00471		ORF	7	ARG80			663.71	0.178041	0.347846		885.689	0.51692	0.00304127		636.85	0.0696533	0.99407		943.476	0.545625	0.00162438			ARG80	300.23	0.359254	0.200544	0.0633197	-0.0953902		0	#N/A	#N/A	#N/A	#N/A	#N/A
Tup.908	chrXIII	362000	362350	350		0.33012	0.364169	0.56818	0.261763		Intergenic	8				465.987	0.059296	0.749549		450.631	-0.683721	1.16695e-05		476.11	0.128502	0.99407		443.932	-0.479422	0.00814969			YMR044W	279.676	-0.0560136	-0.377628	-0.0255514	-0.347165	2 peaks, 1 IG	tH(GUG)M	#N/A	#N/A	#N/A	#N/A	#N/A
Tup.909	chrXIII	362950	363200	250		0.658016	0.45418	-0.475076	-0.619636		tRNA	3	tH(GUG)M			251.958	-1.13701	2.309e-09		241.311	-1.45043	2.08198e-14		329.439	-0.116862	0.99407		155.259	-0.301657	0.197282			YMR044W	279.676	-0.0560136	-0.377628	-0.0255514	-0.347165	2 peaks, 1 IG	tH(GUG)M	#N/A	#N/A	#N/A	#N/A	#N/A
Tup.910	chrXIII	379210	379520	310		0.706494	0.563523	-0.22769	-0.439106		tRNA	8	tW(CCA)M			359.703	-0.914555	1.66318e-07		330.764	-1.3369	1.74084e-14		445.075	-0.135316	0.99407		235.993	-0.425602	0.0436347			tV(AAC)M	#N/A	#N/A	#N/A	#N/A	#N/A		tW(CCA)M	#N/A	#N/A	#N/A	#N/A	#N/A
Tup.911	chrXIII	387700	388770	1070		1.65664	1.74771	2.84053	2.98106		Intergenic	2	AAC1			7718.93	1.17631	9.51911e-07		7933.63	0.72738	0.00829015		5016.03	0.196326	0.99407		11141.7	-0.127815	0.443163			YMR056C	66.3558	-0.757272	0.0497976	-0.517566	0.289504		YMR058W	9475.52	0.0361786	-0.297321	-0.128015	-0.461515
Tup.912	chrXIII	408010	409120	1110		2.40225	2.25884	1.82863	2.21027		ORF	4	NAT4			7812.42	-0.76254	0.00517684		7937.66	-0.720377	0.0168803		9279.55	-0.131207	0.99407		6372.51	0.0339973	0.830241			NAT4	70.0548	0.686524	0.814515	-0.105871	0.0221206		0	#N/A	#N/A	#N/A	#N/A	#N/A
Tup.913	chrXIII	420040	420780	740		1.0032	0.881568	0.588188	0.442535		tRNA	1				1265.58	-0.540907	0.000920889		1236.91	-0.827018	5.27952e-08		1451.53	-0.0695965	0.99407		1038.86	-0.225248	0.124239			YMR076C	659.005	-0.125327	-0.267594	0.00975897	-0.132508		tV(AAC)M	#N/A	#N/A	#N/A	#N/A	#N/A
Tup.914	chrXIII	427180	427450	270		-0.0958148	-0.178893	0.73183	-0.624378		ORF	8	NAM7			311.375	1.09178	4.18191e-07		176.699	-0.655952	0.0439836		196.136	-0.0430781	0.99407		302.922	-1.6474	8.61477e-17			NAM7	2063.52	0.0231638	-0.152506	0.0174122	-0.158258		0	#N/A	#N/A	#N/A	#N/A	#N/A
Tup.915	chrXIII	431480	434130	2650		0.310022	0.2569	3.0652	3.22426		Intergenic	6				26529.6	3.56922	1.71868e-91		24389.8	3.26393	1.13274e-169		4104.44	0.00792011	0.99407		50276.7	-0.158071	0.359671			YMR081C	71.5091	2.47979	2.02083	0.0963701	-0.362594		YMR083W	3698.73	0.363954	0.337335	-0.00357606	-0.0301958
Tup.916	chrXIII	434270	434660	390		0.138156	0.0460667	0.128895	0.771197		ORF	7	ADH3			437.323	0.129354	0.571862		551.726	0.232077	0.381982		435.95	0.117969	0.99407		567.725	0.367319	0.0290767			ADH3	3698.73	0.363954	0.337335	-0.00357606	-0.0301958		0	#N/A	#N/A	#N/A	#N/A	#N/A
Tup.917	chrXIII	472620	473320	700		1.55007	1.35548	1.29775	1.69417		ORF	4	YMR102C	YPK2		2197.83	-0.194228	0.377307		2411.64	0.0214137	0.932059		2232.82	-0.114143	0.99407		2423.32	0.226908	0.174602			YMR102C	756.476	0.43318	0.349899	0.0365675	-0.0467139		YPK2	722.509	0.826366	1.61528	-0.23395	0.554959
Tup.918	chrXIII	480510	480800	290		0.789669	0.556503	0.224807	0.064531		tRNA	8	tK(CUU)M			330.558	-0.464354	0.031934		301.562	-0.785214	5.38447e-06		360.271	-0.156377	0.99407		269.508	-0.345219	0.0896811			YMR106C	160.148	-0.109129	-0.232469	0.102594	-0.0207459		tK(CUU)M	9.52698	0.552372	-0.390939	0.815139	-0.128171
Tup.919	chrXIII	482100	482870	770		-0.115397	-0.0122688	0.866041	1.51801		Intergenic	5				1136.4	1.58778	2.06109e-18		1557.74	1.81669	4.31437e-18		591.681	0.121532	0.99407		2231.29	0.494225	0.00153649			tK(CUU)M	9.52698	0.552372	-0.390939	0.815139	-0.128171		YMR107W	33.0629	3.27748	2.48256	0.57709	-0.217832
Tup.920	chrXIII	499430	500740	1310		0.60419	0.45587	-0.55578	-0.851837		snRNA	3	ASC1			1116.44	-1.11471	7.32695e-11		1051.07	-1.61376	5.9453e-13		1466.5	-0.0981544	0.99407		659.377	-0.469388	0.0266207			snR24	36.3048	0.0586624	-0.157566	-0.303834	-0.520062		YMR117C	221.414	0.245373	-0.39938	0.0478158	-0.596936
Tup.921	chrXIII	504780	505120	340		0.850353	0.487568	-0.22815	-0.245309		tRNA	8	tL(CAA)M			355.182	-0.961855	2.65704e-08		340.994	-1.16377	1.15472e-12		443.465	-0.143176	0.99407		243.873	-0.21426	0.295911			YMR118C	17.8526	1.79454	2.95742	-0.153913	1.00897		tL(CAA)M	#N/A	#N/A	#N/A	#N/A	#N/A
Tup.922	chrXIII	510520	512070	1550		1.09949	0.908798	0.856486	1.26831		Intergenic	1	YMR122W-A			3854.1	-0.0603188	0.774256		4486.46	0.434307	0.0256496		3656.95	-0.188735	0.99407		4825.01	0.435072	0.00343594			YMR121C	167.691	0.15483	0.0885571	0.111153	0.04488		YMR122W-A	3437	0.822265	1.52706	-0.359522	0.345272
Tup.923	chrXIII	512360	512970	610		-0.144013	-0.230666	1.88476	2.57606		Intergenic	5				1722.01	2.79307	6.06316e-45		2500.22	3.12808	8.6309e-33		447.125	0.0798202	0.99407		4045.99	0.563496	8.46275e-05			YMR122W-A	3437	0.822265	1.52706	-0.359522	0.345272		YMR123W	499.277	0.0412439	-0.407628	0.0978011	-0.351071
Tup.924	chrXIII	537210	537790	580		0.0206642	-0.0446037	0.895629	1.85		Intergenic	5	REC114			822.316	1.04318	4.29304e-07		1231.87	1.50207	1.47208e-09		555.661	0.0999895	0.99407		1579.7	0.69542	0.000569886			YMR133W	#N/A	#N/A	#N/A	#N/A	#N/A		YMR134W	214.515	-0.00319919	-0.09987	0.224916	0.128245
Tup.925	chrXIII	540060	541180	1120		3.36642	3.06395	3.37532	3.62812		Intergenic	2				20698.9	0.134002	0.671819		20272	0.143585	0.651792		18375.4	-0.172869	0.99407		23183.1	-0.0365613	0.833785			YMR135C	206.809	0.451591	0.912056	-0.221246	0.23922		YMR136W	316.243	1.57541	1.56282	0.0985526	0.0859647
Tup.926	chrXIII	550250	551130	880		0.403852	0.418399	-0.794256	-1.05223		ORF	3	RPL13B			679.242	-1.2011	4.87543e-11		679.448	-1.91748	1.86744e-10		950.593	0.0277258	0.99407		375.722	-0.565604	0.0366549			RPL13B	5146.16	-0.322293	-0.515347	-0.0400419	-0.233097		0	#N/A	#N/A	#N/A	#N/A	#N/A
Tup.927	chrXIII	551300	551710	410		0.0864449	0.0704913	-0.513567	-0.355203		Intergenic	3				388.016	-0.676129	0.00226285		404.659	-1.0107	0.000112831		480.115	0.0201188	0.99407		305.677	-0.178387	0.460029			YMR142C	5146.16	-0.322293	-0.515347	-0.0400419	-0.233097		YMR143W	8414.32	0.0382228	-0.118931	0.0139901	-0.143164
Tup.928	chrXIII	552230	552630	400		0.43602	0.272534	-0.870084	-1.25074		ORF	3	RPS16A			312.589	-1.2194	2.37868e-10		289.568	-1.97657	3.53842e-16		423.762	-0.0777809	0.99407		164.883	-0.703478	0.00622783			RPS16A	8414.32	0.0382228	-0.118931	0.0139901	-0.143164		0	#N/A	#N/A	#N/A	#N/A	#N/A
Tup.929	chrXIII	552880	553170	290		0.511007	0.609445	-0.348566	-0.460838		Intergenic	3	RPS16A			295.89	-0.869945	5.95009e-07		294.905	-1.43196	1.84921e-18		382.601	0.0216913	0.99407		199.274	-0.409053	0.0632462			YMR143W	8414.32	0.0382228	-0.118931	0.0139901	-0.143164		YMR144W	214.667	0.143751	0.0996015	0.0888995	0.0447502
Tup.930	chrXIII	556710	557740	1030		1.82531	1.63759	1.47765	1.34851		Intergenic	4	TIF34			4839.91	-0.243589	0.332845		4302.74	-0.683883	0.0102815		4969.83	-0.124837	0.99407		4180.75	-0.440222	0.00223126			YMR145C	7333.1	0.364504	1.14419	-0.461617	0.318065		YMR146C	2261.55	-0.107915	-0.396406	0.105835	-0.182656
Tup.931	chrXIII	608180	608720	540		0.293051	0.385205	1.73589	2.41213		Intergenic	5	DDR48			1412.99	1.72266	3.13905e-11		2107.58	2.04971	4.4152e-25		694.375	0.167776	0.99407		3014.75	0.628038	0.124971			YMR172W	177.937	-0.0472036	-0.260741	0.223086	0.0095489		YMR173W	1470.62	2.83657	3.43259	-0.0411058	0.554917
Tup.932	chrXIII	615960	616440	480		-0.186252	-0.13988	0.783742	1.35003		Intergenic	7				638.417	1.35639	1.50839e-09		807.933	1.33667	3.35016e-08		384.549	0.193351	0.99407		1120.82	0.31752	0.059403			YMR176W	666.031	-0.172761	-0.000905302	-0.0739978	0.0978584		YMR177W	360.662	0.596864	0.480096	0.0967976	-0.0199707
Tup.933	chrXIII	624230	624610	380		-0.0470974	-0.0483289	0.192071	0.773487		ORF	7	RGM1			349.57	0.296248	0.202198		438.367	0.474071	0.172071		321.218	0.061752	0.99407		481.818	0.380045	0.0942889			RGM1	94.1129	1.98379	1.60064	0.722649	0.339499		0	#N/A	#N/A	#N/A	#N/A	#N/A
Tup.934	chrXIII	625290	626830	1540		0.964546	0.864794	2.02575	2.22686		Intergenic	4	YMR182W-A			9384.96	2.3275	2.5779e-34		9958.94	2.28654	7.91528e-43		3060.1	-0.0251524	0.99407		17380.6	0.0662182	0.682849			YMR182C	94.1129	1.98379	1.60064	0.722649	0.339499		YMR182W-A	19.5211	-0.338211	-0.912664	-0.169278	-0.743731
Tup.935	chrXIII	631970	632960	990		0.460553	0.433906	-0.289709	-0.712853		Intergenic	3	HSC82			963.679	-0.593	0.000134048		915.881	-1.47127	1.69368e-13		1178.66	0.0613855	0.99407		676.319	-0.683024	0.000192858			YMR185W	338.467	-0.255061	-0.0924914	-0.0827696	0.0798001		YMR186W	17933.7	-0.181383	-0.467268	-0.0482555	-0.334141
Tup.936	chrXIII	637060	637470	410		1.18395	1.14561	-0.403571	-0.620146		Intergenic	8	GCV2			695.968	-1.77697	3.33679e-15		669.756	-2.42602	1.76916e-21		1038.71	-0.0746917	0.99407		283.348	-0.603013	0.0049469			YMR188C	182.001	0.105169	-0.248143	0.112639	-0.240673		YMR189W	2777.3	0.5689	0.822488	-0.0690761	0.184511
Tup.937	chrXIII	652050	653860	1810		0.606629	0.651255	0.278021	0.368289		Intergenic	8	CMC4			3016.97	-0.04366	0.752345		3136.51	-0.282417	0.0105682		3060.76	0.0192212	0.99407		3135.78	-0.0876902	0.548653			YMR194C-B	70.4633	1.16612	1.37341	-0.241143	-0.0338505		YMR195W	179.398	1.32869	0.696198	0.31933	-0.313166
Tup.938	chrXIII	660970	662360	1390		1.28369	1.00113	1.54739	2.18674		Intergenic	4	CIK1			3589.7	0.222286	0.268466		4208.08	0.73411	7.68925e-06		3056.06	-0.214625	0.99407		4931.95	0.429209	0.0127302			YMR198W	273.473	-0.0929748	1.41477	-0.0189916	1.48875		YMR199W	755.927	0.340749	0.229307	0.163828	0.0523862
Tup.939	chrXIII	675160	675680	520		0.0322427	0.0725535	0.735265	0.866418		Intergenic	7				866.896	1.21913	6.77914e-13		889.563	0.762683	3.27634e-06		555.531	0.184066	0.99407		1258.43	-0.129126	0.405537			YMR205C	21680.9	0.178736	0.406586	-0.164101	0.0637499		YMR206W	59.9281	4.13992	4.268	0.323768	0.451846
Tup.940	chrXIII	687290	687540	250		-0.4685	-0.118132	-0.000116	0.904252		Intergenic	7	YMR210W			200.203	0.622226	0.0691354		298.059	0.712754	0.0327914		180.612	0.350709	0.99407		330.554	0.597776	0.00433472			YMR209C	331.409	-0.114565	-0.305842	-0.0712228	-0.2625		YMR210W	181.585	-0.0184288	0.0256063	0.00318056	0.0472157
Tup.941	chrXIII	713410	713670	260		-0.112535	-0.268454	0.784019	-0.567912		ORF	8	ERG8			293.503	1.04375	1.57919e-05		163.44	-0.6727	0.0481892		185.78	-0.0983172	0.99407		280.982	-1.67489	4.56474e-14			ERG8	766.521	-0.503502	-0.318589	-0.068626	0.116287		0	#N/A	#N/A	#N/A	#N/A	#N/A
Tup.942	chrXIII	753400	753740	340		0.425194	0.308641	-0.582815	-0.9981		ORF	3	RPL20A			261.987	-1.02822	7.3311e-09		235.179	-1.68817	1.73941e-12		335.069	-0.123299	0.99407		153.323	-0.654595	0.0116759			RPL20A	7504.35	-0.10541	-0.417986	0.0588674	-0.253709		0	#N/A	#N/A	#N/A	#N/A	#N/A
Tup.943	chrXIII	756240	757020	780		1.78151	1.624	3.38209	3.26661		Intergenic	2				6681.85	2.0523	2.47708e-18		5575.82	1.62319	6.06212e-14		2507.34	-0.0678295	0.99407		10364	-0.367068	0.0171192			YMR243C	3300.26	0.330964	0.312092	-0.201301	-0.220173		YMR244W	9.26721	0.749877	0.423075	-0.244231	-0.571033
Tup.944	chrXIII	758850	759710	860		0.620235	0.514622	1.89374	2.57869		Intergenic	6	YMR244C-A			2626.94	1.74924	3.81795e-21		3633.64	2.10764	1.18258e-40		1211.09	0.0320465	0.99407		5378.14	0.530184	0.00655324			YMR244C-A	111.457	0.440924	0.0470244	0.197028	-0.196871		YMR246W	3791.59	-0.116348	-0.585856	-0.0194147	-0.488923
Tup.945	chrXIII	772880	773250	370		-0.276373	-0.0622892	0.661243	1.09815		ORF	7	GTO3			368.802	1.14329	3.94028e-07		445.216	0.815635	0.0026432		259.653	0.327008	0.99407		580.993	0.149375	0.455657			GTO3	45.9819	2.82828	2.26507	-0.0861846	-0.649394		0	#N/A	#N/A	#N/A	#N/A	#N/A
Tup.946	chrXIII	773820	774960	1140		1.58641	1.44108	1.98893	2.0143		Intergenic	4	GTO3	HOR7		5869.01	0.771329	0.00107019		5209.72	0.268784	0.29797		4263.35	-0.0188168	0.99407		7088.52	-0.395361	0.0131573			YMR251W	45.9819	2.82828	2.26507	-0.0861846	-0.649394		YMR251W-A	1526.63	1.44685	1.3923	0.0183567	-0.0361838
Tup.947	chrXIII	797480	798560	1080		0.658634	0.622973	2.63232	3.41578		Intergenic	6	YMR265C			5679.29	2.01425	6.8823e-29		8267.62	2.5173	5.80344e-48		2218.44	-0.0226519	0.99407		12537.4	0.613263	0.000883491			YMR265C	153.276	-0.0584044	-0.589198	0.142833	-0.38796		YMR266W	3778.26	0.907792	0.623841	-0.115296	-0.399247
Tup.948	chrXIII	808150	808430	280		0.514757	0.460475	-0.0591393	-0.01385		tRNA	8	CDC65			310.919	-0.557703	0.00390578		315.857	-0.990043	1.63781e-09		371.084	0.0309761	0.99407		250.212	-0.270004	0.181437			YMR271C	88.6857	0.318607	0.447475	0.0635486	0.192417		tQ(CUG)M	#N/A	#N/A	#N/A	#N/A	#N/A
Tup.949	chrXIII	808740	809010	270		-0.419133	-0.404933	0.137626	0.839185		Intergenic	7				276.481	0.745328	0.00268424		356.083	0.986581	0.000185523		210.507	0.0488929	0.99407		441.602	0.427652	0.0380233			tQ(CUG)M	#N/A	#N/A	#N/A	#N/A	#N/A		YMR272C	2420.86	1.03788	1.1338	-0.137744	-0.0418256
Tup.950	chrXIII	810840	811340	500		0.0697104	-0.0190386	0.21211	0.864893		Intergenic	7	YMR272W-B	ZDS1		605.562	0.40365	0.0557618		722.375	0.483284	0.0168433		530.471	0.0482999	0.99407		825.557	0.271483	0.0984294			YMR272C	2420.86	1.03788	1.1338	-0.137744	-0.0418256		YMR272W-B	#N/A	#N/A	#N/A	#N/A	#N/A
Tup.951	chrXIII	819310	819960	650		-0.093025	-0.153366	1.48222	2.33128		ORF	5	DSK2			1357.25	2.14968	2.34886e-23		2021.22	2.54352	6.71464e-23		514.567	0.0844081	0.99407		3054.47	0.628382	4.47204e-05			DSK2	1653.28	-0.0630404	-0.17007	-0.0335558	-0.140585		0	#N/A	#N/A	#N/A	#N/A	#N/A
Tup.952	chrXIII	826370	827070	700		0.849285	0.911677	2.33036	2.98028		Intergenic	6	PGM3			3903.71	2.22894	7.22561e-37		4765.31	2.33518	3.79452e-47		1385.67	0.0532175	0.99407		7767.98	0.292283	0.0643979			YMR279C	225.497	4.89287	5.83208	-0.407183	0.532024		YMR280C	209.403	1.20578	1.65554	-0.360242	0.0895153
Tup.953	chrXIII	831400	831830	430		0.181918	0.30295	0.0531763	0.821928		Intergenic	7				463.37	0.144868	0.385236		616.868	0.356104	0.00892067		461.294	0.147667	0.99407		636.253	0.493191	0.00247291			YMR280C	209.403	1.20578	1.65554	-0.360242	0.0895153	2 peaks, 1 IG	YMR281W	178.354	0.387638	-0.240241	-0.0192472	-0.647126
Tup.954	chrXIII	832010	832800	790		-0.427236	-0.262378	1.18803	2.56926		Intergenic	5	GPI12			1214.24	1.9449	1.09751e-16		2447.95	2.62336	4.2097e-16		556.344	0.285149	0.99407		3316.27	1.11401	3.25459e-12			YMR280C	209.403	1.20578	1.65554	-0.360242	0.0895153	2 peaks, 1 IG	YMR281W	178.354	0.387638	-0.240241	-0.0192472	-0.647126
Tup.955	chrXIII	851900	852460	560		0.512548	0.539474	0.297285	0.753737		Intergenic	1				817.604	-0.0854049	0.571862		926.405	-0.114494	0.39815		849.317	0.0453532	0.99407		909.433	0.145044	0.395553			YMR290C	1510.61	-0.0924202	-0.527217	0.043759	-0.391038		YMR291W	972.348	1.57146	1.33746	0.182368	-0.0516345
Tup.956	chrXIII	880350	881100	750		1.6589	1.42333	1.68185	2.34901		Intergenic	4				3063.16	0.26248	0.286384		3740.58	0.83686	0.000343245		2580.54	-0.19491	0.99407		4393.52	0.509173	0.00233201			YMR305C	8048.53	1.36664	2.07866	-0.0465394	0.665482		YMR306W	208.12	0.61569	1.75091	-0.229571	0.90565
Tup.957	chrXIII	886500	887900	1400		0.372096	0.212971	-0.486354	-0.497466		Intergenic	3	GAS1			1304.21	-0.762045	1.96585e-08		1421.37	-0.733415	4.52525e-06		1609.89	-0.0403902	0.99407		1097.11	0.123117	0.456016			YMR306W	208.12	0.61569	1.75091	-0.229571	0.90565		YMR307W	22083.1	0.129913	-0.0490501	-0.229031	-0.407995
Tup.958	chrXIII	887990	888310	320		0.36085	0.345544	-0.335428	-0.768334		ORF	3	GAS1			251.512	-0.701688	4.02441e-05		243.455	-1.52525	1.32156e-11		316.742	0.0594406	0.99407		171.168	-0.632338	0.0096517			GAS1	22083.1	0.129913	-0.0490501	-0.229031	-0.407995		0	#N/A	#N/A	#N/A	#N/A	#N/A
Tup.959	chrXIII	902490	902740	250		-0.000252	0.005516	-0.076836	0.084472		Intergenic	7	PRE5			226.427	-0.00896152	0.969261		244.578	-0.191866	0.370318		230.51	0.0403855	0.99407		244.38	7.40956e-05	0.999651			YMR314W	704.804	-0.218264	-0.0734591	-0.166049	-0.0212436		YMR315W	926.611	0.528633	1.17546	-0.0219284	0.624898
Tup.960	chrXIII	904290	904540	250		-0.45212	-0.276804	0.547528	0.356288		Intergenic	7	YMR315W-A			264.186	0.98954	0.00110722		238.755	0.236129	0.436469		186.867	0.147427	0.99407		329.966	-0.472654	0.052289			YMR315W-A	12.0747	0.757287	2.07619	0.0474966	1.3664		YMR316W	151.109	1.10309	1.54141	-0.0342888	0.404034
Tup.961	chrXIII	905640	906450	810		1.02086	1.47847	2.95362	3.14197		Intergenic	6	DIA1			6644.8	2.52742	7.65986e-34		6792.94	1.4975	2.29756e-10		2563.99	0.711164	0.191669		11529.4	-0.187237	0.268503			YMR316W	151.109	1.10309	1.54141	-0.0342888	0.404034	2 peaks, 1 IG	YMR317W	313.42	5.47733	5.26134	0.14145	-0.0745432
Tup.962	chrXIII	906810	907350	540		0.397813	0.699518	1.90432	1.49599		Intergenic	5				1674.58	1.97111	7.99231e-54		1282.48	0.904222	8.90877e-11		737.325	0.244534	0.27721		2346.84	-0.689506	5.14739e-07			YMR316W	151.109	1.10309	1.54141	-0.0342888	0.404034	2 peaks, 1 IG	YMR317W	313.42	5.47733	5.26134	0.14145	-0.0745432
Tup.963	chrXIII	914580	915940	1360		1.91859	2.08232	3.33436	3.48992		Intergenic	2				17653.5	1.69697	4.6459e-10		17357.2	1.13196	2.11029e-05		8984.34	0.246999	0.99407		27444.5	-0.188686	0.312614			YMR319C	962.047	0.372984	0.236986	-0.0165046	-0.152503		YMR321C	#N/A	#N/A	#N/A	#N/A	#N/A
Tup.964	chrXIV	9980	10660	680		0.674862	0.588648	1.36609	1.79357		Intergenic	5				1389.46	1.25574	7.3733e-19		1719.2	1.41924	2.34177e-27		825.477	0.0431259	0.99407		2410.2	0.339906	0.0249056			YNL336W	233.001	-0.31405	0.457773	-0.0267238	0.7451		YNL335W	5.93644	0.548283	1.4508	-0.820947	0.0815744
Tup.965	chrXIV	65150	65600	450		0.788875	0.593841	0.134324	1.06559		Intergenic	1				522.394	-0.671875	2.21303e-05		728.466	0.0240323	0.861569		641.199	0.0220081	0.99407		613.996	0.850131	1.36924e-08			YNL301C	1234.8	-0.420823	-0.620624	-0.0348984	-0.2347		YNL300W	1462.29	1.0435	0.848982	0.197818	0.00330065
Tup.966	chrXIV	68320	68810	490		1.00954	0.86957	-0.381814	0.381494		Intergenic	8	TRF5			634.32	-1.49502	2.97621e-17		761.72	-0.791345	9.0016e-09		896.078	-0.102079	0.99407		480.97	0.732582	2.04757e-05			YNL299W	245.096	-0.408865	-0.533483	-0.0324563	-0.157074		YNL298W	538.749	0.359249	0.237199	0.0917719	-0.0302778
Tup.967	chrXIV	87320	87860	540		1.57306	1.3097	0.330386	1.35693		Intergenic	1				1459.69	-1.22924	1.59374e-07		1868.16	-0.270579	0.255176		1926.79	-0.144394	0.99407		1385.73	0.94219	5.39002e-10			YNL290W	378.893	-0.214206	-0.523412	0.113573	-0.195633		YNL289W	526.47	0.541839	0.654317	0.231182	0.343661
Tup.968	chrXIV	88980	89770	790		0.925078	0.874557	-0.358006	-0.502417		snRNA	8				951.649	-1.37466	1.05619e-12		903.163	-1.6101	1.57638e-18		1289.42	-0.159487	0.99407		526.156	-0.266303	0.145402			YNL289W	526.47	0.541839	0.654317	0.231182	0.343661		snR40	197.586	0.0641224	-0.262082	0.110755	-0.215449
Tup.969	chrXIV	96160	96430	270		0.559011	0.4103	-0.4804	-0.376459		tRNA	3	SUF6			230.863	-1.01531	1.00219e-07		235.44	-1.21018	1.16536e-10		299.978	-0.0614735	0.99407		159.274	-0.124728	0.611742			YNL286W	113.586	-0.150438	-0.359573	0.29702	0.0878856		tG(UCC)N	#N/A	#N/A	#N/A	#N/A	#N/A
Tup.970	chrXIV	104700	104990	290		0.548255	0.31711	-0.482231	-0.520545		tRNA	3	tT(AGU)N1			261.022	-0.923935	8.40344e-06		246.313	-1.36383	5.65974e-15		327.917	-0.0972755	0.99407		172.093	-0.405314	0.0941936			YNL284C	384.705	-0.10089	-0.290197	-0.0705161	-0.259823		tT(AGU)N	#N/A	#N/A	#N/A	#N/A	#N/A
Tup.971	chrXIV	107110	107480	370		0.169884	0.0982243	-0.539141	0.853165		Intergenic	7				305.137	-0.52092	0.0114229		490.742	0.269037	0.13033		378.798	0.155074	0.99407		424.288	1.08714	1.54776e-09			YNL283C	1080.29	0.306968	0.895865	0.0786661	0.667563		YNL282W	79.2422	-0.0297065	-0.413759	0.209813	-0.17424
Tup.972	chrXIV	110540	110790	250		-0.286524	-0.194732	-0.514476	0.494988		Intergenic	7				172.52	-0.131063	0.672768		293.323	0.358143	0.322695		205.487	0.347373	0.99407		266.566	0.989625	6.77614e-06			YNL280C	1363.98	-0.243076	0.313889	-0.295641	0.261325		YNL279W	434.234	-0.321898	6.6655	0.0887937	7.07619
Tup.973	chrXIV	112640	113180	540		0.0584863	0.144487	1.19201	0.915451		Intergenic	7	PRM1			744.902	1.27706	1.0079e-08		675.378	0.463612	0.016875		470.938	0.228	0.99407		995.558	-0.457535	0.0373119			YNL279W	434.234	-0.321898	6.6655	0.0887937	7.07619		YNL278W	420.54	0.338842	-0.111839	0.134226	-0.316455
Tup.974	chrXIV	137850	138440	590		0.435174	0.513956	-0.0864844	0.313585		Intergenic	8	BSC4			666.506	-0.448971	0.00379531		727.445	-0.517502	9.47735e-05		766.05	0.00313545	0.99407		627.291	0.0685844	0.703565			YNL269W	11.3541	1.65485	3.25734	0.144424	1.74691		YNL268W	2438.37	0.342723	0.288535	-0.181643	-0.235831
Tup.975	chrXIV	174140	174680	540		0.641034	0.41974	-0.765895	-0.882733		ORF	3	NRD1			475.07	-1.32858	1.20601e-12		487.712	-1.73003	4.69467e-14		672.541	-0.0137923	0.99407		267.825	-0.283897	0.253649			NRD1	1306.02	0.22664	0.0491386	0.12641	-0.0510908		0	#N/A	#N/A	#N/A	#N/A	#N/A
Tup.976	chrXIV	198140	198800	660		0.521521	0.63312	0.208182	0.28959		Intergenic	8	NAR1			754.503	-0.416921	0.00144185		801.48	-0.632651	3.5181e-06		865.012	0.0233768	0.99407		688.15	-0.0587875	0.73315			YNL241C	2809.63	0.13585	0.337429	-0.0589111	0.142668		YNL240C	440.891	0.155091	0.175634	-0.132338	-0.111795
Tup.977	chrXIV	209870	210300	430		0.696654	0.566332	0.756632	1.18326		Intergenic	1	YNL234W			734.226	0.206277	0.259086		946.603	0.540114	6.82939e-06		683.574	0.0280619	0.99407		1031.39	0.493374	0.00428793			YNL236W	665.042	-0.0913324	-0.0785431	0.0484954	0.0612847		YNL234W	158.376	1.69586	1.04707	0.218551	-0.430236
Tup.978	chrXIV	217140	217830	690		1.13833	1.01741	0.90187	0.715278		ORF	1	ELA1			1314.57	-0.168301	0.308014		1299.41	-0.369606	0.023154		1345.37	-0.0715222	0.99407		1283.14	-0.144874	0.372476			ELA1	146.469	0.242335	0.0726314	0.0688021	-0.100902		0	#N/A	#N/A	#N/A	#N/A	#N/A
Tup.979	chrXIV	229860	230680	820		0.525043	0.358002	-0.731047	-0.917577		snRNA	3	SNR19			638.138	-1.16438	5.65014e-12		602.766	-1.57556	8.78115e-15		842.149	-0.122804	0.99407		375.974	-0.401332	0.0588335			YNL222W	114.997	-0.276653	-0.392262	0.140728	0.0251191		snR19	13803.1	0.136583	0.295258	0.10873	0.267405
Tup.980	chrXIV	239910	240290	380		0.607855	0.533961	1.21086	1.41097		ORF	1	MGS1			737.451	0.743896	1.49331e-06		735.021	0.501519	0.000261318		546.712	-0.00693939	0.99407		965.052	-0.11422	0.530173			MGS1	223.77	0.0969312	-0.00528944	-0.0459745	-0.148195		0	#N/A	#N/A	#N/A	#N/A	#N/A
Tup.981	chrXIV	252370	252920	550		0.532337	0.35322	-0.613709	-0.903659		ORF	3	SSB2			433.907	-1.08256	7.07853e-11		411.964	-1.62453	6.93303e-12		570.885	-0.0770437	0.99407		258.937	-0.487778	0.0375572			SSB2	24615.8	-0.060338	0.166136	-0.257847	-0.0313735	2 peaks, 1 IG	0	#N/A	#N/A	#N/A	#N/A	#N/A
Tup.982	chrXIV	253330	253660	330		0.387997	0.201158	-0.661279	-0.834185		ORF	3	SSB2			228.152	-0.989444	2.62419e-06		224.141	-1.50492	6.54862e-08		298.614	-0.0279537	0.99407		145.306	-0.41344	0.137398			SSB2	24615.8	-0.060338	0.166136	-0.257847	-0.0313735	2 peaks, 1 IG	0	#N/A	#N/A	#N/A	#N/A	#N/A
Tup.983	chrXIV	254070	254450	380		0.488508	0.320734	0.691071	1.16693		Intergenic	1	YNL208W			481.204	0.366786	0.00930633		597.752	0.504409	0.000479314		430.406	0.0811895	0.99407		670.81	0.354332	0.0284564			YNL209W	24615.8	-0.060338	0.166136	-0.257847	-0.0313735		YNL208W	2005.11	1.74131	2.5161	-0.180097	0.59469
Tup.984	chrXIV	273700	274410	710		-0.282256	-0.206697	1.93949	2.67238		Intergenic	5				1997.17	2.85174	6.97616e-34		2805.78	3.10149	6.0409e-32		505.166	0.108127	0.99407		4617.73	0.500097	0.0104324			YNL194C	115.134	3.87295	3.3366	0.47952	-0.0568285		YNL193W	255.459	0.496285	0.649772	-0.110237	0.0432503
Tup.985	chrXIV	275850	276360	510		0.424881	0.599512	1.11112	1.72717		Intergenic	5	YNL193W			1015.09	0.827647	1.48579e-07		1249.25	0.941431	1.45054e-11		746.376	0.0782867	0.99407		1591.94	0.322902	0.0767905			YNL193W	255.459	0.496285	0.649772	-0.110237	0.0432503		YNL192W	3246.81	0.417335	1.34577	-0.113448	0.814985
Tup.986	chrXIV	300780	303660	2880		1.68162	1.54461	1.66187	1.67421		Intergenic	4	RPS3			16303.7	0.511787	0.0421558		15220.8	0.204635	0.445767		12979.2	-0.0670081	0.99407		19174.8	-0.245387	0.129792			YNL180C	770.786	1.16938	0.798261	0.079179	-0.291942		YNL178W	6365.42	-0.519985	-0.492478	-0.294298	-0.266792
Tup.987	chrXIV	310000	310440	440		0.307141	0.0912136	0.63779	1.27929		Intergenic	7	MDG1			625.295	0.598015	9.4851e-05		825.182	0.851472	1.82473e-08		511.586	0.0878229	0.99407		980.067	0.479744	0.00378998			YNL173C	469.677	1.65162	1.12427	-0.0600256	-0.587372		YNL172W	1098.84	0.227989	0.345932	-0.00197344	0.11597
Tup.988	chrXIV	331770	332290	520		0.450823	0.361393	-0.69764	-1.03616		ORF	3	RPL42A			410.566	-1.12832	1.33198e-07		407.868	-1.83866	5.81932e-16		565.519	0.0220691	0.99407		235.094	-0.552887	0.0265713			RPL42A	2002.9	-0.353702	-0.503565	-0.01396	-0.163823		0	#N/A	#N/A	#N/A	#N/A	#N/A
Tup.989	chrXIV	335830	336280	450		0.15261	0.00791244	0.0240744	0.950637		Intergenic	7				451.647	-0.00794156	0.974498		646.896	0.598378	0.0054282		456.211	0.0273061	0.99407		663.821	0.768595	0.000167956			YNL161W	922.083	-0.0774562	-0.22785	0.101389	-0.0490054		YNL160W	899.737	1.66065	2.58473	-0.267529	0.656553
Tup.990	chrXIV	349950	350350	400		0.363821	0.21788	-0.129818	-0.159787		ORF	8	ALF1			457.321	-0.446214	0.0105633		459.9	-0.837153	0.000109359		526.612	0.00334649	0.99407		387.157	-0.25561	0.221073			ALF1	123.619	0.382291	0.0915316	-0.0812824	-0.372042		0	#N/A	#N/A	#N/A	#N/A	#N/A
Tup.991	chrXIV	351790	352720	930		1.96417	0.457472	1.23114	1.48747		ORF	4	YNL146W			4666.25	-0.565233	0.0425726		2354.2	1.27653	1.50394e-22		3364.48	-2.1592	7.50629e-15		3835.23	-0.186793	0.260819			YNL146W	32.7862	0.936439	-0.0263319	1.39636	0.433592		0	#N/A	#N/A	#N/A	#N/A	#N/A
Tup.992	chrXIV	355180	355740	560		0.733428	0.386327	0.809259	1.32503		Intergenic	1				973.58	0.270409	0.0817188		1120.99	0.597781	1.52287e-06		837.625	-0.133979	0.99407		1304.54	0.328401	0.0473277			YNL144C	171.961	1.75807	1.65987	-0.293852	-0.392052		YNL142W	647.896	-1.16214	-1.08716	0.0838418	0.158813
Tup.993	chrXIV	392450	392780	330		0.23183	0.286985	0.222327	0.873679		Intergenic	7				325.493	0.295556	0.109819		400.378	0.239492	0.150547		310.523	0.174404	0.99407		427.115	0.256219	0.141552			YNL125C	860.327	1.07281	1.36344	-0.0355911	0.255036		YNL124W	355.501	0.130615	-0.296645	0.314107	-0.113153
Tup.994	chrXIV	413330	414190	860		0.518175	0.462241	-0.864105	-1.11581		Intergenic	3	DBP2			662.006	-1.25994	3.7415e-10		699.153	-1.94329	8.97222e-14		960.368	0.0963431	0.99407		365.817	-0.460152	0.0725081			YNL113W	409.528	-0.0955073	-0.398377	0.304087	0.00121706		YNL112W	2828.11	-0.10466	-0.270229	0.0154803	-0.150088
Tup.995	chrXIV	417420	417790	370		0.757678	0.893105	-0.452657	-0.394278		Intergenic	8	CYB5			463.393	-1.25767	1.48817e-09		504.172	-1.66006	8.85769e-11		667.059	0.083164	0.99407		278.896	-0.203137	0.460029			YNL111C	638.57	0.135185	0.0860443	0.239314	0.190173		YNL110C	455.674	0.00426457	-0.554356	0.243055	-0.315566
Tup.996	chrXIV	426780	427350	570		1.66619	1.56734	1.46754	1.5742		Intergenic	4	LEU4			1755.27	-0.0351896	0.880705		1696.46	-0.33172	0.171995		1725.11	-0.0519792	0.99407		1750.7	-0.22057	0.1719			YNL104C	9540.35	0.30111	1.13653	-0.219122	0.616294		YNL103W	696.706	0.20307	-0.0244506	0.143882	-0.0836387
Tup.997	chrXIV	442460	443270	810		0.510406	0.310336	-0.201954	0.366778		tRNA	8				782.44	-0.544953	0.000184097		957.205	-0.0668498	0.706207		899.796	-0.0762819	0.99407		848.223	0.543814	0.00224307			YNL097C	200.929	0.141707	0.233059	-0.107436	-0.0160845		tL(CAA)N	#N/A	#N/A	#N/A	#N/A	#N/A
Tup.998	chrXIV	461770	462440	670		1.05223	0.95658	2.84627	2.72054		ORF	6	TCB2	TOP2		4078.83	2.27167	1.0305e-27		3560.08	1.93453	2.27131e-27		1354.55	-0.0699105	0.99407		6708.62	-0.27033	0.154762			TCB2	2741.03	0.00977785	-0.31268	0.0126372	-0.309821		TOP2	1385.6	-0.201838	-0.0551435	-0.0251536	0.121541
Tup.999	chrXIV	477760	478390	630		0.596521	0.469435	0.0953882	1.74691		Intergenic	1	EOS1			678.815	-0.505721	0.0011965		1275.83	0.86454	3.09904e-07		800.105	0.0370855	0.99407		1193.14	1.54133	4.54452e-19			YNL080C	686.881	0.339846	0.0287569	0.0467288	-0.264361		YNL079C	1973.98	0.131441	0.151082	0.243866	0.263507
Tup.1000	chrXIV	479320	479700	380		0.784353	0.747689	0.0555316	0.703458		Intergenic	1	NIS1	TPM1		483.349	-0.665526	1.42952e-05		568.499	-0.419212	0.00656068		585.386	-0.0177755	0.99407		464.807	0.362752	0.0464172			YNL079C	1973.98	0.131441	0.151082	0.243866	0.263507		YNL078W	713.665	0.264561	0.692391	0.0699319	0.497762
Tup.1001	chrXIV	493960	494970	1010		0.573365	0.391145	-0.747385	-1.01559		ORF	3	RPL16B			800.482	-1.22783	7.3656e-13		791.602	-1.91834	1.24355e-18		1116.45	0.00437572	0.99407		437.307	-0.555684	0.00857732			RPL16B	16739.2	0.0559628	0.0782395	-0.100791	-0.0785144		0	#N/A	#N/A	#N/A	#N/A	#N/A
Tup.1002	chrXIV	495220	495620	400		0.719296	0.693647	-0.0822938	0.259888		Intergenic	8				524.946	-0.646932	2.24015e-05		579.096	-0.872833	5.8317e-10		653.145	0.0773518	0.99407		441.605	-0.0155536	0.936323			YNL069C	16739.2	0.0559628	0.0782395	-0.100791	-0.0785144		YNL068C	471.981	-0.130862	-0.395382	0.00716567	-0.257354
Tup.1003	chrXIV	499520	501720	2200		0.951973	0.862387	0.494374	0.677334		ORF	1	RPL9B	SUN4		3620.49	-0.0748533	0.672114		3929.81	-0.103112	0.464966		3663.84	-0.0153793	0.99407		3948.54	0.0895755	0.540739			RPL9B	2249.1	-0.265096	0.0702324	-0.345391	-0.0100625		SUN4	3918.24	0.274236	-0.346917	0.00539645	-0.615757
Tup.1004	chrXIV	502970	503560	590		1.86961	1.69034	2.25168	2.42529		Intergenic	4				3271.43	0.448144	0.060863		3267.24	0.361915	0.167581		2648.93	-0.0942297	0.99407		4026.77	-0.0535497	0.739945			YNL066W	3918.24	0.274236	-0.346917	0.00539645	-0.615757		YNL065W	894.553	1.38124	0.957093	0.490749	0.0666009
Tup.1005	chrXIV	516730	517190	460		-0.302283	-0.0838438	0.711115	1.85194		Intergenic	5				527.245	1.28576	1.58264e-08		1072.59	1.96675	2.55869e-12		349.349	0.348374	0.99407		1326.62	1.17941	6.24133e-12			YNL058C	938.997	0.379646	0.883266	0.18804	0.69166		YNL056W	230.704	-0.0437771	0.546921	0.0168969	0.607595
Tup.1006	chrXIV	519460	519720	260		0.244908	0.169092	-0.13425	0.387442		Intergenic	8				256.627	-0.467281	0.0150404		307.052	-0.25981	0.188463		298.147	0.0132852	0.99407		267.135	0.357467	0.085901			tD(GUC)N	#N/A	#N/A	#N/A	#N/A	#N/A	2 peaks, 1 IG	YNL054W	512.611	-0.0123426	-0.315163	0.0654812	-0.23734
Tup.1007	chrXIV	525260	525820	560		-0.747786	-0.548117	-0.367802	0.841502		Intergenic	7				384.533	0.420597	0.120544		684.055	1.10849	0.000590235		358.592	0.234459	0.99407		740.472	1.06548	6.36153e-09			tD(GUC)N	#N/A	#N/A	#N/A	#N/A	#N/A	2 peaks, 1 IG	YNL054W	512.611	-0.0123426	-0.315163	0.0654812	-0.23734
Tup.1008	chrXIV	529510	529820	310		0.198729	0.116287	-0.581626	0.897165		Intergenic	7	VAC7			287.424	-0.632491	0.00177619		443.075	0.36256	0.116346		347.472	-0.00624806	0.99407		390.311	1.12879	3.52337e-09			YNL054W	512.611	-0.0123426	-0.315163	0.0654812	-0.23734		YNL053W	372.77	0.247309	0.751883	0.153729	0.658302
Tup.1009	chrXIV	546410	546840	430		-0.587007	-0.404583	-1.05343	0.512758		Intergenic	7				225.563	-0.456524	0.159272		418.883	0.517207	0.144445		285.126	0.23521	0.99407		368.476	1.36428	1.9953e-11			YNL044W	1273.07	0.215689	0.421473	0.0221358	0.22792		tP(UGG)N	#N/A	#N/A	#N/A	#N/A	#N/A
Tup.1010	chrXIV	546970	547880	910		0.584742	0.448018	-0.10477	0.521863		tRNA	8	YNL042W-B			997.042	-0.50328	0.000395802		1229.27	-0.282224	0.020153		1184.12	0.0561358	0.99407		1044.11	0.408512	0.0100818			YNL042W-B	20.062	-0.0199431	3.81789	0.11847	3.95631		YNL042W	205.925	1.01353	2.38947	0.168378	1.54432
Tup.1011	chrXIV	559190	559610	420		1.4554	1.38966	-0.383692	-0.189809		Intergenic	8				828.756	-1.89429	6.30711e-21		903.377	-2.07649	3.9495e-18		1300.99	0.0177671	0.99407		376.391	-0.0367578	0.853696			YNL037C	1047.71	0.226782	1.06773	-0.253934	0.587013		YNL036W	775.645	0.746555	2.23369	-0.328553	1.15858
Tup.1012	chrXIV	560610	560880	270		0.694852	0.460919	-0.373615	-0.618744		tRNA	3	tT(AGU)N2			304.175	-1.11274	3.29153e-08		275.662	-1.56765	2.50196e-17		390.322	-0.160092	0.99407		179.141	-0.482609	0.0357335			YNL036W	775.645	0.746555	2.23369	-0.328553	1.15858		tT(AGU)N	#N/A	#N/A	#N/A	#N/A	#N/A
Tup.1013	chrXIV	567980	568300	320		0.59745	0.649106	-0.260097	-0.220888		tRNA	8	tP(UGG)N2			355.984	-0.896667	1.03238e-07		373.868	-1.22066	4.49858e-09		463.706	0.0289636	0.99407		255.662	-0.17045	0.446811			tP(UGG)N	#N/A	#N/A	#N/A	#N/A	#N/A		YNL035C	297.968	-0.114976	-0.122912	0.0256429	0.017707
Tup.1014	chrXIV	572460	572800	340		-0.352347	-0.267338	0.0110353	1.34171		Intergenic	7				301.188	0.486165	0.0391771		515.579	1.24723	5.61791e-05		262.597	0.122163	0.99407		581.202	1.03094	6.89217e-09			YNL034W	18.3473	0.989711	0.748978	-0.260658	-0.501391		YNL033W	#N/A	#N/A	#N/A	#N/A	#N/A
Tup.1015	chrXIV	575550	576040	490		0.427035	0.309262	-0.466353	-0.878548		ORF	3	HHT2			437.966	-0.96019	8.71148e-09		426.765	-1.70974	2.89613e-18		579.939	0.0258965	0.99407		268.585	-0.594983	0.0070722			HHT2	3846.27	0.0592517	-0.467434	0.152572	-0.374114		0	#N/A	#N/A	#N/A	#N/A	#N/A
Tup.1016	chrXIV	585570	586410	840		0.566428	0.473503	-0.744158	-0.939515		ORF	3	RRP2			719.834	-1.28079	6.34182e-13		692.587	-1.77627	1.0172e-18		985.766	-0.0806387	0.99407		395.303	-0.444515	0.0375572			RRP2	#N/A	#N/A	#N/A	#N/A	#N/A		0	#N/A	#N/A	#N/A	#N/A	#N/A
Tup.1017	chrXIV	597630	597970	340		-0.450253	-0.39685	1.02771	1.41874		Intergenic	5				455.856	1.67337	1.52474e-07		481.498	1.42253	5.33127e-05		226.366	0.10169	0.99407		756.651	-0.00219312	0.99284			YNL020C	164.779	0.0507815	0.434862	0.0360445	0.420125		YNL019C	4.43625	0.781456	0.761369	-0.17652	-0.196607
Tup.1018	chrXIV	618250	618570	320		0.781613	0.684922	0.560903	0.422575		Intergenic	1	SIS1			553.482	-0.160573	0.331426		507.301	-0.837052	6.44583e-07		580.779	0.00878192	0.99407		479.408	-0.535299	0.00178829			YNL008C	445.785	0.226192	0.432408	-0.193369	0.0128465		YNL007C	1735.49	-0.2688	-0.348886	-0.00370895	-0.0837949
Tup.1019	chrXIV	619720	620020	300		0.164133	0.201407	0.107087	-0.203293		Intergenic	8				370.303	0.0385096	0.835112		327.52	-1.04069	3.87813e-10		379.532	0.114363	0.99407		318.325	-0.826532	2.5779e-06			YNL007C	1735.49	-0.2688	-0.348886	-0.00370895	-0.0837949		YNL006W	333.119	-0.209747	-0.144054	-0.0735045	-0.00781148
Tup.1020	chrXIV	628700	628960	260		0.317365	0.60305	-0.6038	-1.09683		Intergenic	3				241.368	-0.920953	2.69443e-06		270.736	-2.15006	8.079e-22		354.618	0.334362	0.675187		143.946	-0.765558	0.00383701			YNL001W	159.681	-0.425072	-0.316386	0.0179652	0.126652		YNR001C	1763.92	0.410863	1.35194	-0.392049	0.549023
Tup.1021	chrXIV	631460	631740	280		-0.206286	-0.136129	-0.536457	0.380746		Intergenic	7				196.059	-0.128977	0.625316		276.577	0.2864	0.319622		214.167	0.121666	0.99407		264	0.68222	0.0004754			YNR001C	1763.92	0.410863	1.35194	-0.392049	0.549023		tP(AGG)N	#N/A	#N/A	#N/A	#N/A	#N/A
Tup.1022	chrXIV	632490	632740	250		0.585884	0.403836	-0.208604	-0.121812		tRNA	8	tN(GUU)N2			264.555	-0.791175	1.91621e-06		267.419	-1.03079	3.09916e-09		326.851	-0.0486592	0.99407		199.594	-0.157449	0.481127			tN(GUU)N	#N/A	#N/A	#N/A	#N/A	#N/A		YNR002C	69.6697	2.2104	2.38461	-0.0975553	0.0766604
Tup.1023	chrXIV	633960	634270	310		-0.224532	-0.105874	0.401171	0.95751		ORF	7	RPC34			319.139	0.845863	8.13097e-05		407.37	0.722294	0.0144098		251.899	0.265962	0.99407		494.655	0.285092	0.115982			RPC34	248.018	-0.172936	-0.22263	-0.0331513	-0.0828449		0	#N/A	#N/A	#N/A	#N/A	#N/A
Tup.1024	chrXIV	640990	641260	270		-0.479126	-0.408444	-0.8413	0.887389		ORF	7	LRO1			146.972	-0.307081	0.391483		290.74	0.872864	0.0321542		173.738	0.169259	0.99407		274.027	1.51454	1.94981e-09			LRO1	577.779	0.0163746	-0.269373	0.0811986	-0.204549		0	#N/A	#N/A	#N/A	#N/A	#N/A
Tup.1025	chrXIV	642070	642600	530		0.295157	0.165848	0.386277	1.1003		Intergenic	7	LRO1			651.58	0.168143	0.386905		836.383	0.483412	0.00329778		617.778	0.0316724	0.99407		899.091	0.478234	0.0121387			YNR008W	577.779	0.0163746	-0.269373	0.0811986	-0.204549		YNR009W	161.419	0.130215	-0.135273	0.261551	-0.00393638
Tup.1026	chrXIV	651990	652480	490		0.211849	0.318047	0.785763	1.36956		Intergenic	5				757.209	0.784239	1.64882e-05		946.246	0.887702	8.90877e-11		574.769	0.100991	0.99407		1181.63	0.338272	0.0579715			YNR013C	2236.23	0.147183	0.385193	0.0240093	0.262019		YNR014W	129.213	2.8307	2.98536	-0.248831	-0.0941734
Tup.1027	chrXIV	662010	662480	470		0.635165	0.474049	0.378892	0.429835		Intergenic	8	TIM23			642.738	-0.325847	0.0434689		674.273	-0.543871	0.000647306		713.068	0.00849664	0.99407		605.181	-0.077579	0.69473			YNR016C	18945.3	-0.483831	-0.320071	-0.258802	-0.0950418		YNR017W	1089.28	0.0999117	-0.0985304	-0.07465	-0.273092
Tup.1028	chrXIV	663720	664120	400		0.646656	0.567007	-0.316247	-0.195947		Intergenic	8				504.015	-0.972862	3.29461e-10		550.461	-1.27505	3.47428e-14		680.001	0.0727097	0.99407		357.691	-0.100867	0.623624			YNR017W	1089.28	0.0999117	-0.0985304	-0.07465	-0.273092		YNR018W	591.066	0.279402	0.250162	0.037296	0.00805585
Tup.1029	chrXIV	664910	665350	440		0.749604	0.648487	-0.352797	-0.375021		Intergenic	8	AIM38			528.966	-0.839005	1.58282e-05		506.173	-1.3274	1.51314e-10		660.716	-0.0562123	0.99407		361.518	-0.422644	0.074539			YNR018W	591.066	0.279402	0.250162	0.037296	0.00805585		YNR019W	1353.81	-0.605683	-0.887412	-0.0288143	-0.310543
Tup.1030	chrXIV	675690	676140	450		1.16451	0.856631	0.105464	0.290651		ORF	8	BUD17			688.195	-0.989694	9.75351e-08		699.584	-0.725209	8.90422e-07		843.176	-0.216882	0.99407		534.301	0.175589	0.317664			BUD17	224.259	-0.245136	-0.325289	0.116503	0.0363499		0	#N/A	#N/A	#N/A	#N/A	#N/A
Tup.1031	chrXIV	691650	692290	640		-0.555537	-0.583223	0.973571	0.930781		Intergenic	7				833.728	1.80254	1.68931e-08		781.842	1.43575	9.74643e-06		375.067	0.0181121	0.99407		1321.15	-0.210021	0.378908			YNR034W	150.999	0.423471	0.5802	-0.0938056	0.062923		YNR034W-A	70.6093	3.1293	2.21122	0.338256	-0.579823
Tup.1032	chrXIV	703260	703610	350		-0.493351	-0.299809	-1.02933	0.941551		Intergenic	7	AGA1			174.492	-0.44449	0.195		390.15	0.855185	0.0087493		225.298	0.303946	0.99407		350.492	1.75818	9.85176e-15			YNR043W	3033.78	-0.430952	0.0449652	-0.134862	0.341056		YNR044W	695.408	-0.145698	4.51829	0.43268	5.09666
Tup.1033	chrXIV	716030	716470	440		0.539675	0.531774	-0.764123	-1.05853		snRNA	3	BRE5	SNR49		382.218	-1.33156	8.20381e-17		382.081	-2.03866	1.91148e-16		546.295	0.0130945	0.99407		198.199	-0.56635	0.0251403			YNR050C	908.327	-0.360442	0.215078	-0.09042	0.4851		snR49	48.67	-0.178928	-0.165768	-0.15938	-0.14622
Tup.1034	chrXIV	722610	722920	310		0.411274	0.231939	-0.888635	-1.1152		Intergenic	3	NOG2			212.758	-1.20677	2.43161e-08		202.084	-1.64863	1.98554e-09		284.497	-0.109427	0.99407		122.055	-0.421272	0.166227			snR191	384.194	-0.286648	-0.189216	0.0465233	0.143955		YNR054C	277.376	-0.0127993	-0.295929	0.148169	-0.134961
Tup.1035	chrXIV	733290	734140	850		-0.0587243	0.00344542	3.18953	2.2334		ORF	6	BIO4			4947.03	3.91699	4.22245e-113		2223.48	2.31379	7.28609e-33		640.217	0.118939	0.99407		7025.67	-1.34288	4.74818e-26			BIO4	57.7883	0.242594	1.66169	0.174501	1.59359		0	#N/A	#N/A	#N/A	#N/A	#N/A
Tup.1036	chrXIV	738400	739920	1520		1.12015	1.44211	3.24693	3.62408		Intergenic	2	MNT4			13195.1	2.47688	2.4587e-22		15834.8	2.00503	3.78031e-18		4814.48	0.512113	0.99407		25774.2	0.170108	0.326999			YNR059W	192.393	0.0915085	0.359559	-0.0929447	0.175106		YNR060W	651.32	1.06392	0.277554	0.16377	-0.622599
Tup.1037	chrXIV	759090	760080	990		1.61563	1.40037	3.49978	3.21525		Intergenic	2				8006.08	2.31289	1.05539e-22		6440.26	1.96823	1.07287e-24		2499.46	-0.175111	0.99407		12744.7	-0.388776	0.0115674			YNR067C	4521.71	-0.18832	-0.506922	0.0330736	-0.285529		YNR068C	38.8868	0.211031	0.551401	-0.13394	0.206429
Tup.1038	chrXIV	763700	764480	780		0.981868	1.06089	1.81698	2.36769		Intergenic	4				2716.67	1.29367	2.08143e-09		3568.97	1.64928	2.83863e-21		1551.21	-0.0121775	0.99407		5003.69	0.479219	0.00504316			YNR069C	72.7355	0.53279	0.393073	0.069581	-0.0701352	2 peaks, 1 IG	YNR070W	#N/A	#N/A	#N/A	#N/A	#N/A
Tup.1039	chrXIV	764820	765280	460		-0.762331	-0.689172	0.241291	1.84336		Intergenic	7				386.076	1.13287	0.000253477		959.867	2.38654	2.05726e-10		259.565	0.181348	0.99407		1156.31	1.59225	1.09138e-20			YNR069C	72.7355	0.53279	0.393073	0.069581	-0.0701352	2 peaks, 1 IG	YNR070W	#N/A	#N/A	#N/A	#N/A	#N/A
Tup.1040	chrXIV	781300	781700	400		-0.208855	-0.164139	0.587736	1.52825		Intergenic	7	YNR075C-A			542.209	0.935249	2.00682e-05		959.06	1.78869	8.3493e-18		378.611	0.0552991	0.99407		1188.82	1.04498	5.42882e-08			YNR075C-A	#N/A	#N/A	#N/A	#N/A	#N/A		YNR076W	#N/A	#N/A	#N/A	#N/A	#N/A
Tup.1041	chrXV	10950	11390	440		-0.421677	-0.104945	1.18324	2.09456		Intergenic	5				702.693	1.87147	1.05564e-13		1199.96	2.33361	2.46584e-14		329.126	0.232806	0.99407		1676.39	0.842455	5.42882e-08			YOL162W	18.4054	0.18666	1.22276	-0.112498	0.923607		YOL161C	8.45262	0.33474	4.88892	0.129897	4.68407
Tup.1042	chrXV	11970	12710	740		0.0808306	0.260263	1.50306	2.87241		Intergenic	5				1488.93	1.89682	3.52132e-21		3564.93	3.04037	2.63597e-60		660.237	0.138949	0.99407		4700.25	1.41859	1.61317e-17			YOL161C	8.45262	0.33474	4.88892	0.129897	4.68407		YOL159C-A	78.1599	0.272092	0.543038	0.036086	0.307032
Tup.1043	chrXV	17720	18290	570		-0.424948	-0.371388	0.829639	2.06577		Intergenic	5	YOL159C			725.585	1.69976	8.71148e-09		1375.62	2.34054	6.0141e-12		374.402	0.243107	0.99407		1843.54	1.03605	2.2439e-07			YOL159C	138.567	-0.00516539	1.14978	-0.314271	0.840678		YOL158C	893.057	0.443636	0.386547	-0.21585	-0.272939
Tup.1044	chrXV	21390	22030	640		0.422839	0.613948	1.7595	2.21942		Intergenic	5	ENB1			1699.99	1.63086	2.61079e-41		2244.18	1.62867	3.32443e-28		903.341	0.253706	0.118216		3224.42	0.386418	0.0213109			YOL158C	893.057	0.443636	0.386547	-0.21585	-0.272939		YOL157C	190.063	4.21677	4.77778	-0.0037826	0.557224
Tup.1045	chrXV	24190	25270	1080		2.67324	2.53631	3.37014	3.27153		Intergenic	2				27737.5	1.85224	4.8188e-10		25198.7	1.51154	2.40265e-08		11800.4	-0.0163405	0.99407		43564.4	-0.22972	0.178471			YOL157C	190.063	4.21677	4.77778	-0.0037826	0.557224		YOL156W	7.85734	0.654333	1.65365	-0.150336	0.848977
Tup.1046	chrXV	26790	29390	2600		1.73402	1.59586	1.37993	1.4935		Intergenic	4	HPF1			25394.8	0.260925	0.370869		22543.8	-0.0178389	0.951881		21574.1	-0.165968	0.99407		27033.5	-0.317514	0.0485448			YOL155W-A	#N/A	#N/A	#N/A	#N/A	#N/A		YOL155C	330.245	-0.132828	0.925732	0.243225	1.30179
Tup.1047	chrXV	31660	33650	1990		0.166954	0.0748711	0.752181	1.98996		Intergenic	5				2496.81	0.784362	3.48581e-08		4538.47	1.8002	1.26164e-26		1818.59	-0.0122591	0.99407		5507.06	1.14589	6.88983e-17			YOL155C	330.245	-0.132828	0.925732	0.243225	1.30179	2 peaks, 1 IG	YOL154W	109.341	1.33331	2.02627	0.0906961	0.78366
Tup.1048	chrXV	33950	34620	670		-0.365678	-0.352654	1.69041	2.96056		Intergenic	5	ZPS1			1545.83	2.54066	4.08094e-25		3515.46	3.53428	1.47088e-28		476.866	0.139003	0.99407		4925.32	1.27882	1.3095e-12			YOL155C	330.245	-0.132828	0.925732	0.243225	1.30179	2 peaks, 1 IG	YOL154W	109.341	1.33331	2.02627	0.0906961	0.78366
Tup.1049	chrXV	40370	40650	280		0.588196	-0.117007	0.809679	0.996782		Intergenic	7				436.63	0.267316	0.326916		371.344	0.701359	0.00345723		323.702	-0.643031	0.27721		505.383	-0.0643809	0.799697			YOL154W	109.341	1.33331	2.02627	0.0906961	0.78366		YOL152W	111.841	0.666169	1.47438	-0.588624	0.219588
Tup.1050	chrXV	43270	43750	480		0.808628	0.852006	0.899969	1.2404		Intergenic	1				865.461	0.263026	0.226582		999.094	0.327566	0.042103		786.476	0.0240811	0.99407		1111.45	0.223424	0.240689			YOL152W	111.841	0.666169	1.47438	-0.588624	0.219588		YOL151W	1051.75	1.78421	1.69795	-0.0701778	-0.156438
Tup.1051	chrXV	69060	69370	310		0.641145	0.531703	-0.151458	0.572184		Intergenic	8	MED7			434.507	-0.62439	0.000448946		519.328	-0.408811	0.00339209		527.672	0.0167204	0.99407		425.375	0.368805	0.0460453			YOL136C	1982.69	0.824832	0.663778	0.182195	0.0211404		YOL135C	92.0725	0.254091	-0.154471	0.353486	-0.0550766
Tup.1052	chrXV	73500	74140	640		-0.660725	-0.610293	0.194191	2.22425		Intergenic	7				518.989	0.870798	0.014286		1933.56	2.98253	3.25447e-17		378.711	0.0751331	0.99407		2214.76	2.33914	4.06133e-37			YOL131W	#N/A	#N/A	#N/A	#N/A	#N/A		YOL130W	1080.58	-0.295431	-0.436216	-0.0787544	-0.21954
Tup.1053	chrXV	80430	81390	960		0.524243	0.44829	-0.724214	-0.907605		ORF	3	RPL25			804.513	-1.21992	9.17471e-12		792.831	-1.65206	2.18587e-16		1097.07	-0.0563323	0.99407		467.766	-0.36033	0.097034			RPL25	3962.31	-0.390746	-0.376327	-0.11561	-0.101191		0	#N/A	#N/A	#N/A	#N/A	#N/A
Tup.1054	chrXV	83110	83490	380		0.981339	0.759711	0.619358	0.856371		Intergenic	1				740.786	-0.337867	0.0353036		798.716	-0.33812	0.0146391		809.349	-0.0394859	0.99407		734.891	0.0930006	0.581917			YOL126C	595.096	1.56036	1.95267	0.0312259	0.423533		YOL125W	254.524	-0.00891072	-0.295693	0.0643502	-0.222432
Tup.1055	chrXV	87320	87770	450		0.228513	0.134425	-0.676278	-0.744692		Intergenic	3	HRP1			369.748	-0.871396	1.83802e-05		386.756	-1.29656	4.38036e-10		483.478	0.0454893	0.99407		261.873	-0.245544	0.303453			YOL124C	357.276	-0.0718802	-0.592361	0.0947097	-0.425771		YOL123W	1509.5	-0.0672652	-0.239893	-0.0321181	-0.204746
Tup.1056	chrXV	91430	91950	520		0.315613	0.283478	0.631778	0.822976		Intergenic	7	SMF1			678.969	0.400676	0.0168688		784.809	0.463762	0.00485185		587.037	0.0176519	0.99407		908.584	0.214796	0.223995			YOL122C	1033.1	0.644189	1.41051	-0.266758	0.499561		YOL121C	1944.62	-0.279425	-0.458566	0.0556276	-0.123514
Tup.1057	chrXV	92850	94380	1530		0.504942	0.436173	-0.558548	-0.798154		Intergenic	3	RPL18A			1354.28	-1.14926	4.49359e-12		1338.46	-1.70408	4.17802e-17		1843.57	-0.018703	0.99407		792.95	-0.442827	0.0264282			YOL121C	1944.62	-0.279425	-0.458566	0.0556276	-0.123514		YOL120C	10989.5	-0.158523	-0.190463	-0.222974	-0.254915
Tup.1058	chrXV	96410	96690	280		0.665554	0.475771	0.574221	0.894546		Intergenic	1				431.284	0.257188	0.0875207		429.825	-0.13522	0.341317		396.956	0.0440618	0.99407		475.387	-0.214917	0.230433			YOL119C	626.71	0.875606	1.29888	0.0260227	0.449298		YOL117W	128.554	0.214923	0.250147	-0.0663569	-0.031133
Tup.1059	chrXV	103610	104320	710		0.343978	0.241214	2.1862	2.22776		Intergenic	5	SKM1	YOL114C		2590.72	2.3432	1.5234e-65		2473.19	2.01412	1.62273e-64		864.164	0.0502488	0.99407		4483.27	-0.144483	0.352283			YOL114C	15.9878	0.0940529	-0.44996	-0.194375	-0.738388		YOL113W	447.654	0.253068	0.987816	-0.121445	0.613304
Tup.1060	chrXV	109260	111190	1930		1.21276	1.08621	0.800074	0.702639		ORF	1	SHR5	ZEO1		5142.16	0.112487	0.587105		4894.09	-0.219578	0.26075		4804.8	-0.0527987	0.99407		5330.94	-0.258132	0.0724233			SHR5	158.909	0.520627	0.929811	-0.209738	0.199446		ZEO1	2930.82	-0.414546	-0.326288	0.179709	0.267966
Tup.1061	chrXV	116000	116350	350		0.0209914	0.0244571	0.672334	1.23299		Intergenic	7	WSC3			474.102	0.774282	0.000103435		568.06	0.850061	4.48802e-07		356.665	0.056692	0.99407		717.074	0.276845	0.101507			YOL105C	258.016	0.480293	0.954604	-0.135354	0.338956		YOL104C	197.549	0.21153	0.870449	-0.0834922	0.575426
Tup.1062	chrXV	117920	118380	460		0.240969	0.18273	0.0522863	0.562309		Intergenic	7				872.438	-0.267889	0.0841244		1089.4	0.0478564	0.794752		953.81	0.0131508	0.99407		1025.09	0.465831	0.0038945			YOL104C	197.549	0.21153	0.870449	-0.0834922	0.575426		YOL103W	1088.12	-0.172322	-0.404254	-0.09306	-0.324992
Tup.1063	chrXV	159300	160780	1480		0.921727	0.811564	-0.102403	-0.1935		ORF	8	ADH1			1718.53	-1.04019	1.26814e-07		1696.09	-1.36194	1.49746e-11		2240.34	-0.0692978	0.99407		1116.85	-0.260334	0.176395			ADH1	53579.1	0.105656	0.232857	-0.318247	-0.191046		0	#N/A	#N/A	#N/A	#N/A	#N/A
Tup.1064	chrXV	161220	162280	1060		1.38342	1.25277	1.56557	2.35922		Intergenic	4				4779.94	0.605756	0.017		5940.92	1.08036	4.30984e-06		3582.42	-0.132049	0.99407		7478.84	0.466728	0.00688366			YOL086C	53579.1	0.105656	0.232857	-0.318247	-0.191046		YOL084W	471.402	4.17646	3.94463	0.0245077	-0.207322
Tup.1065	chrXV	170500	170800	300		-0.446687	-0.41068	0.374613	0.595343		Intergenic	7				318.855	0.879587	0.00521977		336.974	0.605169	0.0736781		232.583	0.0836758	0.99407		443.216	-0.0428214	0.850481			YOL082W	332.323	0.251025	0.702993	0.0637163	0.515684		YOL081W	3754.37	0.422196	0.485822	-0.0150555	0.0485704
Tup.1066	chrXV	193350	193740	390		-0.4849	-0.395464	1.00745	1.47702		Intergenic	5	YOL075C			425.744	1.55499	3.65968e-05		544.215	1.60554	2.26508e-05		229.208	0.14863	0.99407		787.931	0.337622	0.485615			YOL075C	573.204	0.0341039	0.525161	-0.138158	0.352899		YOL073C	272.74	0.163595	0.224286	-0.100788	-0.0400964
Tup.1067	chrXV	216290	216850	560		0.870563	0.799968	0.943351	1.2162		Intergenic	1				1176.3	0.214561	0.225615		1264.74	0.102167	0.564991		1086.79	0.016136	0.99407		1391.4	0.0392735	0.844026			YOL060C	938.394	0.137076	0.439344	-0.102111	0.200158		YOL059W	1458.16	0.887706	0.823342	0.287737	0.223373
Tup.1068	chrXV	232040	232430	390		1.35062	1.10631	0.810731	1.30586		Intergenic	1	SPE2			853.312	-0.317688	0.10237		925.133	-0.177413	0.333407		908.357	-0.0933497	0.99407		879.646	0.177738	0.278497			YOL052C-A	205.321	4.2773	3.60825	0.289673	-0.379376		YOL052C	995.716	-0.0512616	-0.299189	-0.00323543	-0.251163
Tup.1069	chrXV	233640	233960	320		0.180153	0.125266	0.581259	1.18715		Intergenic	7				419.26	0.664245	0.000592711		512.772	0.873617	7.66054e-07		324.413	0.00225617	0.996092		634.613	0.356225	0.033582			YOL052C	995.716	-0.0512616	-0.299189	-0.00323543	-0.251163	2 peaks, 1 IG	snR81	92.6353	-0.241191	0.0200903	0.140873	0.402154
Tup.1070	chrXV	234280	234590	310		0.54691	0.407316	-0.790477	-0.36341		snRNA	3	SNR81			288.158	-1.19943	6.30567e-12		327.84	-1.24731	8.53984e-14		405.644	0.0484014	0.99407		199.173	0.134283	0.564783			YOL052C	995.716	-0.0512616	-0.299189	-0.00323543	-0.251163	2 peaks, 1 IG	snR81	92.6353	-0.241191	0.0200903	0.140873	0.402154
Tup.1071	chrXV	241070	241770	700		-0.597367	-0.625511	1.44252	2.50223		Intergenic	5	RRT8	YOL047C		1449.14	2.71148	5.16415e-18		2583.58	3.33636	4.46288e-19		401.085	0.108721	0.99407		3901.5	0.886135	6.33561e-07			YOL048C	238.314	0.53044	0.714432	0.00680775	0.1908		YOL047C	19.3058	0.0168941	2.0839	-0.450283	1.61673
Tup.1072	chrXV	243110	243580	470		-0.575879	-0.461417	-0.819059	1.04329		ORF	7	PSK2			241.267	-0.170353	0.623872		557.775	1.21709	0.000367632		278.316	0.227255	0.99407		542.307	1.76597	6.1477e-20			PSK2	904.014	0.189685	0.374482	0.113157	0.297954		0	#N/A	#N/A	#N/A	#N/A	#N/A
Tup.1073	chrXV	253010	253590	580		0.615288	0.478931	-0.743015	-0.970406		ORF	3	RPS15			485.002	-1.2778	2.05714e-09		471.871	-1.8578	1.00598e-15		671.307	-0.0435267	0.99407		262.609	-0.493035	0.049187			RPS15	13521.9	0.0291074	-0.243364	0.161099	-0.111373		0	#N/A	#N/A	#N/A	#N/A	#N/A
Tup.1074	chrXV	254310	254680	370		0.550611	0.412178	-0.726449	-1.01187		ORF	3	RPP2A			316.934	-1.35425	4.38764e-15		310.029	-1.9229	1.61838e-13		445.586	-0.0513491	0.99407		166.19	-0.491705	0.0620744			RPP2A	5135.56	-0.0835249	-0.121145	-0.158534	-0.196154		0	#N/A	#N/A	#N/A	#N/A	#N/A
Tup.1075	chrXV	267660	268180	520		0.0796746	0.0748288	0.201379	0.861435		Intergenic	7				544.962	0.192094	0.332076		692.816	0.280891	0.144445		534.086	0.140289	0.99407		723.605	0.369461	0.0273913			YOL031C	495.042	0.391129	0.0536288	0.238286	-0.0992141		YOL030W	4226.8	0.518516	1.10758	0.013193	0.602257
Tup.1076	chrXV	271540	271990	450		0.851547	1.07704	0.171518	0.262532		Intergenic	8	MDM38			710.062	-0.610664	0.000141298		725.7	-1.1131	4.69788e-11		870.108	0.0621486	0.99407		551.9	-0.310308	0.0640552			YOL028C	173.819	-0.0529594	-0.302019	0.0656864	-0.183373		YOL027C	1048.21	-0.160374	-0.0867564	-0.0362674	0.0373498
Tup.1077	chrXV	274500	274880	380		0.752424	0.610287	-0.161324	-0.333426		tRNA	8	tS(GCU)O			421.002	-0.891971	2.99517e-08		398.206	-1.36752	3.82523e-15		528.087	-0.0779849	0.99407		279.466	-0.423786	0.0319873			YOL026C	155.691	0.243787	0.033365	0.0431413	-0.167281		tS(GCU)O	#N/A	#N/A	#N/A	#N/A	#N/A
Tup.1078	chrXV	285650	285920	270		0.0091963	0.133833	-0.548922	-0.18367		Intergenic	3				307.767	-0.41286	0.0496156		345.465	-0.826689	0.00012615		373.173	0.171667	0.99407		276.444	-0.10313	0.624381			YOL021C	1440	-0.142414	-0.314444	-0.0235232	-0.195553		YOL020W	2351.74	0.128705	0.230648	-0.143985	-0.0420418
Tup.1079	chrXV	288080	288810	730		0.554599	0.484419	0.0521003	0.645407		ORF	8	YOL019W-A			921.879	-0.327112	0.00898129		1175.05	-0.107646	0.426642		1055.29	0.097402	0.99407		1052.36	0.45299	0.00286431			YOL019W-A	#N/A	#N/A	#N/A	#N/A	#N/A		0	#N/A	#N/A	#N/A	#N/A	#N/A
Tup.1080	chrXV	296620	297010	390		-0.402662	-0.311587	-0.0291974	1.37365		ORF	7	IRC10			299.135	0.347091	0.243625		565.747	1.29151	3.68957e-05		278.798	0.154757	0.99407		614.528	1.24673	1.54776e-09			IRC10	51.7807	0.378642	0.547416	-0.0801883	0.0885854		0	#N/A	#N/A	#N/A	#N/A	#N/A
Tup.1081	chrXV	298840	299560	720		0.257839	0.375654	1.36198	2.14194		Intergenic	5				1791.45	1.74662	1.41664e-39		2624.11	2.17976	4.21431e-59		834.437	0.055879	0.99407		3812.63	0.625978	1.80525e-05			YOL015W	51.7807	0.378642	0.547416	-0.0801883	0.0885854		YOL014W	63.1949	0.328536	0.226006	0.178126	0.075597
Tup.1082	chrXV	301000	301300	300		0.563753	0.512473	0.00963333	0.143733		tRNA	8	YOL013W-B	tP(UGG)O1		314.717	-0.458362	0.0316806		318.098	-0.751226	1.22137e-05		359.026	-0.0148895	0.99407		271.341	-0.170044	0.424625			tP(UGG)O	#N/A	#N/A	#N/A	#N/A	#N/A		YOL013C	481.613	0.156811	-0.0676525	0.0369974	-0.187466
Tup.1083	chrXV	304560	305230	670		0.311812	0.282114	-0.302498	0.591621		ORF	8	PLB3			702.799	-0.438135	0.00701521		881.168	-0.0284465	0.869574		800.683	-0.0163352	0.99407		792.715	0.529926	0.00127608			PLB3	1612.41	0.299725	0.349595	-0.0448366	0.00503412		0	#N/A	#N/A	#N/A	#N/A	#N/A
Tup.1084	chrXV	312500	313050	550		0.747515	0.584965	0.205458	1.78682		Intergenic	1	TOP1			775.654	-0.376569	0.00272859		1474.47	1.10345	2.8246e-12		854.695	-0.0508446	0.99407		1450.84	1.56401	1.64414e-24			YOL007C	837.989	0.203364	0.33278	0.149516	0.278932		YOL006C	708.635	-0.0841169	-0.317249	0.0186327	-0.214499
Tup.1085	chrXV	343380	344190	810		-0.191393	-0.233851	1.97599	2.52202		ORF	5	TIR4			2498.16	2.6652	2.30172e-26		3169.98	2.81292	4.30894e-26		693.916	0.0518517	0.99407		5333.93	0.345974	0.0353483			TIR4	169.455	1.04018	0.85714	0.148784	-0.0342567		0	#N/A	#N/A	#N/A	#N/A	#N/A
Tup.1086	chrXV	347090	349860	2770		0.478154	0.5453	2.38119	2.7336		Intergenic	6				19103.9	2.74926	3.24932e-47		21387.3	2.77695	1.30356e-91		4889.08	-0.00821281	0.99407		38102.7	0.154437	0.365022			YOR010C	204.565	3.73779	3.79365	-0.0597434	-0.00388668		YOR011W	839.852	1.46706	1.76925	-0.146918	0.155274
Tup.1087	chrXV	353950	354210	260		0.629765	0.464962	-0.253762	-0.278469		tRNA	8	tT(AGU)O2			272.145	-0.7509	6.39553e-06		257.179	-1.06108	1.3318e-09		324.757	-0.120038	0.99407		199.821	-0.299805	0.153109			YOR011W	839.852	1.46706	1.76925	-0.146918	0.155274		tT(AGU)O	#N/A	#N/A	#N/A	#N/A	#N/A
Tup.1088	chrXV	382640	383970	1330		1.65765	1.5743	2.3913	2.27637		Intergenic	4	CIN5			11294.2	1.84516	3.29107e-12		9579.77	1.36715	2.6967e-08		4830.52	-0.0195976	0.99407		16992.6	-0.365741	0.042524			YOR027W	2755.18	-0.529226	-0.537466	-0.0621039	-0.0703439		YOR028C	209.354	1.97939	1.7302	0.0474546	-0.201738
Tup.1089	chrXV	384210	385810	1600		1.429	1.31829	2.8977	2.97838		Intergenic	2	CIN5			17344.3	1.4893	1.44257e-08		16823.5	1.39983	2.5975e-07		8645.43	-0.118881	0.99407		27006.4	-0.0792653	0.636985			YOR028C	209.354	1.97939	1.7302	0.0474546	-0.201738		YOR030W	451.123	0.157841	-0.11262	0.246641	-0.0238198
Tup.1090	chrXV	391120	392580	1460		2.60542	2.44204	2.82808	2.87787		ORF	2	YOR032W-A			14885.9	0.221991	0.465242		14132	0.174284	0.572245		12734.7	-0.187425	0.99407		16752.1	-0.109122	0.509048			YOR032W-A	79.1722	-1.24314	-0.454038	-0.17154	0.617558		0	#N/A	#N/A	#N/A	#N/A	#N/A
Tup.1091	chrXV	407670	408180	510		0.719106	0.67414	-0.522554	-0.629184		ORF	3	GLO4	SNR9		507.702	-1.29099	7.59462e-12		495.732	-1.69241	5.01504e-23		696.262	-0.0762304	0.99407		285.51	-0.345385	0.105652			GLO4	67.0384	0.430449	0.364265	-0.0158693	-0.0820528		SNR9	1276.91	-0.11813	0.390948	-0.0322457	0.476832
Tup.1092	chrXV	417840	418360	520		-0.106325	-0.0901608	0.63864	1.28821		Intergenic	7				736.194	0.915683	2.34785e-06		1030.86	1.21191	1.08742e-10		532.992	0.128113	0.99407		1297.02	0.560598	0.000992066			YOR047C	346.035	0.188908	-0.112985	0.176385	-0.125508		YOR048C	1378.38	-0.145875	-0.286999	-0.054609	-0.195733
Tup.1093	chrXV	423940	425080	1140		2.09763	1.92845	2.9695	3.19551		Intergenic	2	ETT1			11516	0.813907	0.00290045		11938.7	0.988446	0.000475208		7710.83	-0.200764	0.99407		16507.4	0.0996915	0.536398			YOR049C	254.355	2.24348	1.95539	-0.252945	-0.541034		YOR051C	936.05	0.499307	0.271816	0.160573	-0.0669174
Tup.1094	chrXV	426160	426440	280		-0.00268214	0.157207	0.0226893	0.493396		Intergenic	7				325.024	0.0109361	0.955784		393.336	0.0884863	0.712461		332.362	0.075896	0.99407		394.21	0.293995	0.0999896			YOR051C	936.05	0.499307	0.271816	0.160573	-0.0669174		YOR052C	505.896	0.796324	1.55325	0.206659	0.963584
Tup.1095	chrXV	438540	438850	310		0.788929	0.60961	-0.257119	-0.244361		tRNA	8	tK(UUU)O			353.102	-0.918228	8.24182e-06		331.766	-1.26883	2.60331e-11		438.273	-0.123123	0.99407		237.225	-0.344596	0.0990439			YOR058C	544.067	0.0436476	-0.241413	0.0475718	-0.237489		tK(UUU)O	16.7766	-0.240531	-0.747091	-0.0513907	-0.557951
Tup.1096	chrXV	443600	446180	2580		0.903011	0.735726	0.322424	0.452214		Intergenic	1	RPL3			4966.42	-0.136225	0.493095		5537.05	0.0639388	0.690461		5000.5	-0.0878833	0.99407		5608.55	0.24386	0.0969903			YOR062C	88.1019	1.98004	1.70639	0.17922	-0.094427		YOR063W	21997	-0.361648	-0.368152	-0.229008	-0.235512
Tup.1097	chrXV	446740	447130	390		1.05809	0.791174	0.315759	-0.182959		Intergenic	8				667.159	-0.795359	9.65839e-06		559.684	-1.45867	1.9084e-15		786.993	-0.192378	0.99407		425.254	-0.726911	1.62481e-05			YOR064C	91.1968	0.248289	0.0798048	0.0682775	-0.100207		YOR065W	2283.07	-0.0670475	0.366394	-0.394637	0.0388045
Tup.1098	chrXV	464310	464670	360		0.783336	0.671217	-0.194742	-0.373514		tRNA	8	SUF11	YOR072W-B		384.491	-0.963678	2.0827e-08		378.866	-1.4205	3.71143e-13		498.668	-0.0294483	0.99407		252.079	-0.358021	0.0838316			YOR071C	535.783	0.429247	0.292934	-0.0103126	-0.146625		tP(UGG)O	#N/A	#N/A	#N/A	#N/A	#N/A
Tup.1099	chrXV	479930	481190	1260		0.539282	0.406591	0.377441	1.83311		ORF	1	LPX1	WHI5		1413.04	-0.053855	0.708865		2621.97	1.19929	3.21653e-12		1428.35	-0.0105199	0.99407		2718.66	1.38374	1.19565e-22			LPX1	210.667	0.147035	-0.255136	-0.263284	-0.665455		WHI5	129.204	-0.0357853	-0.310029	-0.281003	-0.555247
Tup.1100	chrXV	487320	487590	270		0.550674	0.62007	-0.226937	-0.1467		tRNA	8	tN(GUU)O2			297.166	-0.886702	7.50408e-08		291.788	-1.24636	9.5552e-14		374.731	-0.0558937	0.99407		206.564	-0.287339	0.1719			YOR086C	3254.22	0.159106	0.0710996	-0.131066	-0.219073		tN(GUU)O	#N/A	#N/A	#N/A	#N/A	#N/A
Tup.1101	chrXV	505090	505480	390		0.222508	0.372926	-0.277203	0.351346		Intergenic	8				406.281	-0.491669	0.00471207		503.359	-0.469342	0.00145511		497.44	0.147945	0.99407		410.055	0.306201	0.108925			YOR095C	407.927	-0.310275	-0.425314	0.0147117	-0.100327		YOR096W	4127	-0.41043	-0.457057	-0.270401	-0.317027
Tup.1102	chrXV	505860	506650	790		0.464284	0.27287	-0.746331	-1.18431		ORF	3	RPS7A			603.579	-1.18005	5.33491e-11		585.586	-1.81613	1.19421e-12		823.923	-0.0294215	0.99407		338.985	-0.538641	0.0273025			RPS7A	4127	-0.41043	-0.457057	-0.270401	-0.317027		0	#N/A	#N/A	#N/A	#N/A	#N/A
Tup.1103	chrXV	514300	514920	620		1.01806	0.954501	0.604793	1.17488		Intergenic	1				1034.13	-0.373254	0.0247884		1231.56	-0.278562	0.132764		1182.47	0.0653179	0.99407		1088.5	0.289641	0.05788			YOR100C	36.3521	2.27588	2.89124	0.0747616	0.690129		YOR101W	505.857	-0.130129	-0.610424	-0.0501703	-0.530465
Tup.1104	chrXV	519940	521140	1200		1.50495	1.43322	2.78247	3.45631		Intergenic	2				9082.54	0.876077	0.00120248		11411.6	1.3055	1.18755e-06		6109.46	-0.102645	0.99407		15117.2	0.455626	0.0064808			YOR106W	149.686	0.180729	-0.126427	0.104777	-0.20238		YOR107W	119.978	1.57649	0.85354	0.537592	-0.185355
Tup.1105	chrXV	522430	522740	310		0.444526	0.289442	-0.403465	-0.3486		Intergenic	3	RGS2			273.65	-0.861453	1.69016e-05		270.538	-1.08917	3.35598e-07		340.156	-0.0960053	0.99407		197.867	-0.187032	0.451417			YOR107W	119.978	1.57649	0.85354	0.537592	-0.185355		YOR108W	2224.8	-0.7265	-0.200856	-0.152466	0.373178
Tup.1106	chrXV	575360	576370	1010		0.455354	0.29974	-0.651543	-0.80098		ORF	3	EFT1			731.218	-1.04221	9.38713e-11		712.337	-1.45517	1.5192e-08		955.791	-0.0705187	0.99407		462.427	-0.353018	0.125765			EFT1	7258.37	-0.0880368	0.174642	-0.292533	-0.0298546	2 peaks, 1 IG	0	#N/A	#N/A	#N/A	#N/A	#N/A
Tup.1107	chrXV	576620	576950	330		0.43603	0.0943697	-0.546979	-0.95963		ORF	3	EFT1			246.93	-0.91719	6.61111e-08		215.116	-1.35328	4.68424e-07		298.834	-0.218949	0.99407		157.45	-0.524445	0.0471076			EFT1	7258.37	-0.0880368	0.174642	-0.292533	-0.0298546	2 peaks, 1 IG	0	#N/A	#N/A	#N/A	#N/A	#N/A
Tup.1108	chrXV	577900	578360	460		-0.228028	-0.221518	0.517544	1.44203		Intergenic	7				496.963	1.1206	2.65454e-07		802.793	1.63973	1.38659e-08		331.455	0.155382	0.99407		1023.32	0.818245	3.83097e-07			YOR133W	7258.37	-0.0880368	0.174642	-0.292533	-0.0298546		YOR134W	82.5735	3.55374	3.8632	0.468368	0.77783
Tup.1109	chrXV	579130	580110	980		0.389511	0.419167	0.811215	1.5813		ORF	5	BAG7			1530.15	0.256219	0.156094		2120.1	0.753581	9.8973e-07		1399.15	0.030822	0.99407		2336.6	0.666117	0.000105742			BAG7	82.5735	3.55374	3.8632	0.468368	0.77783		0	#N/A	#N/A	#N/A	#N/A	#N/A
Tup.1110	chrXV	586400	586690	290		-0.19651	-0.318959	0.4952	0.991434		Intergenic	7				306.899	0.807128	0.00501695		373.515	0.77893	0.0272811		235.16	0.135185	0.99407		465.405	0.262422	0.160699			YOR138C	465.926	0.0502521	0.0467171	-0.104509	-0.108044		YOR140W	324.425	0.234695	-0.0890827	0.270756	-0.053022
Tup.1111	chrXV	587700	588430	730		-0.411746	-0.438994	-0.917832	1.90103		ORF	7	SFL1			350.917	-0.54961	0.0691354		1349.44	2.23659	1.12132e-14		420.191	0.0190709	0.99407		1354.31	2.95929	1.1013e-48			SFL1	324.425	0.234695	-0.0890827	0.270756	-0.053022		0	#N/A	#N/A	#N/A	#N/A	#N/A
Tup.1112	chrXV	619010	620490	1480		1.70459	1.53618	0.774385	0.597073		Intergenic	1	PDR5			6538.43	-0.859503	0.00122256		5699.83	-1.2402	1.14169e-06		7752.9	-0.213646	0.99407		4349.53	-0.471305	0.00133382			YOR152C	355.114	0.63403	0.822016	-0.0771737	0.110813		YOR153W	39710.8	0.385508	0.538331	-0.174086	-0.0212627
Tup.1113	chrXV	638510	639480	970		0.747311	0.977675	1.27201	1.8747		Intergenic	4	PNS1			2209.17	0.767254	1.1008e-05		2880.93	0.729464	1.80787e-05		1780.47	0.260189	0.99407		3450.64	0.351816	0.0411397			YOR161C	601.851	2.11354	1.64438	-0.143113	-0.612268		YOR161C-C	8.18686	0.69605	0.561846	0.184009	0.0498057
Tup.1114	chrXV	663710	663970	260		0.676635	0.550935	-0.175646	-0.266981		tRNA	8	tV(AAC)O			270.147	-0.889799	1.96182e-06		265.362	-1.1471	1.50668e-08		337.716	-0.0872436	0.99407		191.158	-0.213332	0.373673			YOR176W	1062.41	0.16914	0.304555	-0.0398745	0.0955408		tV(AAC)O	8.54311	0.385015	-1.20159	0.488142	-1.09846
Tup.1115	chrXV	670420	672060	1640		1.75944	1.6286	3.42772	3.49434		Intergenic	2	SYC1			25951	1.19718	3.12085e-05		20587.8	0.779468	0.00576814		14573.9	-0.194992	0.99407		33575.2	-0.484215	0.00349984			YOR178C	772.706	4.39452	5.17507	-0.102095	0.678452		YOR179C	125.903	0.426406	0.167381	0.284576	0.0255504
Tup.1116	chrXV	672310	672590	280		-0.260221	-0.222904	0.115629	0.623289		Intergenic	7	SYC1			242.728	0.495242	0.0637963		298.732	0.491648	0.0737544		212.387	0.138769	0.99407		341.05	0.281488	0.132673			YOR179C	125.903	0.426406	0.167381	0.284576	0.0255504	2 peaks, 1 IG	YOR180C	112.093	0.351803	0.893754	-0.219076	0.322876
Tup.1117	chrXV	673640	674220	580		1.38592	1.35951	2.13501	2.60947		Intergenic	4				2479.62	1.00004	3.09364e-05		2971.26	1.26942	4.42984e-08		1598.02	-0.0668056	0.99407		4059.25	0.332215	0.0715493			YOR179C	125.903	0.426406	0.167381	0.284576	0.0255504	2 peaks, 1 IG	YOR180C	112.093	0.351803	0.893754	-0.219076	0.322876
Tup.1118	chrXV	678100	678450	350		0.43312	0.325166	-0.661909	-0.880737		ORF	3	RPS30B			262.366	-1.04868	1.71551e-05		261.519	-1.57056	5.33244e-11		350.415	-0.0104008	0.99407		163.113	-0.396369	0.166227			RPS30B	999.82	-0.569398	-0.570969	-0.117949	-0.11952		0	#N/A	#N/A	#N/A	#N/A	#N/A
Tup.1119	chrXV	682650	682910	260		-0.349812	-0.459515	-0.953227	0.618888		ORF	7	YOR186W			151.286	-0.348237	0.279765		256.445	0.663102	0.0468905		173.986	0.0644638	0.99407		240.37	1.22517	5.04003e-09			YOR186W	22.6799	1.25562	1.93469	-0.0713936	0.607682		0	#N/A	#N/A	#N/A	#N/A	#N/A
Tup.1120	chrXV	700360	701630	1270		-0.554934	-0.355758	1.10342	2.54358		Intergenic	5				2088.62	2.35491	3.63258e-18		4490.23	3.18448	1.07061e-21		739.976	0.21539	0.99407		6253.47	1.19991	1.75818e-13			YOR192C	121.214	0.931842	1.35392	-0.138249	0.283828		YOR192C-C	57.3606	-0.416876	0.203209	-0.0852783	0.534807
Tup.1121	chrXV	710030	710350	320		0.542334	0.432181	-0.398863	-0.259719		tRNA	8	IMT1			301.984	-0.948286	2.85003e-07		317.429	-1.0422	5.74746e-12		388.082	-0.0473762	0.99407		223.373	-0.00785929	0.97542			YOR192C-C	57.3606	-0.416876	0.203209	-0.0852783	0.534807		tM(CAU)O	#N/A	#N/A	#N/A	#N/A	#N/A
Tup.1122	chrXV	721900	722300	400		-0.233444	-0.132724	-0.135549	0.695552		ORF	7	HIS3			270.943	0.131955	0.648673		406.746	0.577207	0.0640981		275.257	0.176146	0.99407		415.245	0.763401	0.000296574			HIS3	82.8371	0.185114	1.01368	-0.15756	0.67101		0	#N/A	#N/A	#N/A	#N/A	#N/A
Tup.1123	chrXV	742200	742680	480		0.586932	0.575215	0.742044	1.43222		Intergenic	1				819.53	0.287697	0.0526507		1092.35	0.662941	1.12275e-06		745.05	0.0473392	0.99407		1210.74	0.555569	0.000916296			YOR211C	639.831	-0.203906	-0.183509	-0.180266	-0.159869		YOR212W	730.112	0.0492252	-0.0551469	-0.0117929	-0.116165
Tup.1124	chrXV	759110	759460	350		0.523657	0.424629	-0.801111	-0.901871		ORF	3	ODC2	SNR35		288.296	-1.23981	5.12198e-12		282.884	-1.82826	5.25079e-17		398.35	-0.0283979	0.99407		159.878	-0.488141	0.0570377			ODC2	441.274	-0.260171	0.98228	-0.0737804	1.16867		SNR35	527.565	-0.273636	0.100548	-0.0511868	0.322997
Tup.1125	chrXV	762080	762600	520		0.891118	0.940765	1.98523	2.1472		Intergenic	4				1670.82	1.46455	3.7986e-24		1738.64	1.09592	1.0735e-09		936.539	0.172894	0.99407		2610.83	-0.0637859	0.728253			YOR226C	207.394	0.332207	0.311919	0.249682	0.229395		YOR227W	909.354	0.722092	0.882983	-0.0154432	0.145447
Tup.1126	chrXV	768060	768310	250		0.274968	0.244596	0.098536	0.786848		Intergenic	7				325.991	-0.00331641	0.98681		379.859	0.233017	0.198045		319.559	-0.0569511	0.99407		397.22	0.320242	0.0950492			YOR228C	237.842	0.678606	1.15458	-0.306024	0.169947		YOR229W	343.949	0.882171	0.503959	0.110429	-0.267782
Tup.1127	chrXV	770000	770860	860		0.81624	0.832761	2.38856	3.11971		Intergenic	6	WTM1	WTM2		3977.11	1.75821	2.6188e-17		5019.61	2.03088	1.19157e-25		1782.15	-0.0249045	0.99407		7689.24	0.380048	0.0570908			YOR229W	343.949	0.882171	0.503959	0.110429	-0.267782		YOR230W	4075.9	0.420605	0.703911	-0.170846	0.112459
Tup.1128	chrXV	779670	781000	1330		0.873902	0.705621	-0.411767	-0.310347		snRNA	8	SNR17A			1427.99	-1.16911	1.63539e-10		1444.83	-1.44435	3.38137e-16		1926.58	-0.0525757	0.99407		891.907	-0.19619	0.291461			YOR234C	1716.77	-0.342118	-0.522969	0.161984	-0.0188667		snR17a	20185.3	0.175862	0.220153	0.170343	0.214634
Tup.1129	chrXV	796880	798300	1420		1.19196	1.15881	0.489164	0.432048		Intergenic	1	SRL1			4809.12	-0.231466	0.391275		4533.81	-0.516256	0.0481263		4957.39	-0.100939	0.99407		4403.34	-0.25873	0.0866629			YOR246C	666.544	-0.157305	-0.33315	-0.0400084	-0.215854		YOR247W	7459.97	0.95377	0.742332	0.290033	0.0785959
Tup.1130	chrXV	825430	826230	800		0.803396	0.636705	0.527245	1.04855		Intergenic	1	YOR268C			1245.36	-0.0536492	0.749549		1601.08	0.107492	0.398652		1319.73	0.130441	0.99407		1558.76	0.423005	0.0131976			YOR268C	#N/A	#N/A	#N/A	#N/A	#N/A		YOR269W	298.652	0.53031	0.457268	0.083988	0.0109462
Tup.1131	chrXV	832220	832750	530		0.949508	0.76047	-0.516711	-0.655134		snRNA	3	SNR8			585.906	-1.39427	1.15551e-15		569.834	-1.72829	8.5843e-19		812.467	-0.101572	0.99407		317.007	-0.308224	0.129063			YOR271C	1421.88	-0.401592	-0.38224	-0.0208636	-0.00151158		snR8	175.806	0.0357003	-0.121343	0.204185	0.0471418
Tup.1132	chrXV	836540	837800	1260		0.755223	0.798102	1.84524	2.31155		Intergenic	4	MOD5			3534.43	1.35228	2.13919e-19		4207.99	1.38994	1.26424e-24		2028.84	0.0739246	0.99407		6046.02	0.245409	0.161684			YOR273C	946.982	1.35454	1.43633	-0.0790881	0.00269672		YOR274W	207.802	0.342741	-0.0989207	0.214394	-0.227268
Tup.1133	chrXV	842520	842790	270		0.489907	0.319204	-0.931656	-1.00319		snRNA	3	HEM4	SNR5		214.035	-1.24882	3.74116e-09		218.423	-1.8726	2.76049e-11		302.938	0.0377987	0.99407		119.104	-0.462091	0.142433			snR5	264.68	-0.248988	0.214741	-0.722073	-0.258345		YOR278W	102.259	0.011558	0.251214	-0.279865	-0.0402092
Tup.1134	chrXV	854080	854390	310		0.571094	0.493519	-0.313561	-0.102761		tRNA	8	tA(UGC)O			324.384	-0.925448	1.06379e-07		326.02	-0.843932	1.85034e-09		397.998	-0.171014	0.99407		247.023	0.0456348	0.830241			YOR289W	78.7393	0.918438	1.445	0.0242873	0.550847		tA(UGC)O	#N/A	#N/A	#N/A	#N/A	#N/A
Tup.1135	chrXV	867170	867760	590		0.42131	0.169396	-0.873753	-1.17755		ORF	3	RPS10A			441.013	-1.18003	8.92726e-11		423.243	-1.83931	5.28908e-12		600.136	-0.0430072	0.99407		245.439	-0.57374	0.0245913			RPS10A	4708.45	-0.210865	-0.441261	0.174769	-0.0556265		0	#N/A	#N/A	#N/A	#N/A	#N/A
Tup.1136	chrXV	877280	878040	760		0.252667	0.228007	0.0254737	-0.606025		Intergenic	3	MBF1			795.222	-0.110871	0.47347		675.34	-1.16221	2.66324e-10		828.884	0.0197881	0.99407		638.208	-0.893857	8.05007e-09			YOR298C-A	1185.36	-0.441619	-0.337093	-0.141462	-0.0369352		YOR299W	640.882	0.0523786	0.133079	0.00934487	0.0900449
Tup.1137	chrXV	882110	882560	450		0.309725	0.481925	0.593421	1.02259		ORF	1	RAX1			739.99	0.3896	0.0135284		861.315	0.439326	0.00332705		646.644	0.0359556	0.99407		989.247	0.223832	0.197282			RAX1	698.239	0.0500761	-0.287122	0.0133394	-0.323859		0	#N/A	#N/A	#N/A	#N/A	#N/A
Tup.1138	chrXV	891760	892710	950		0.120346	0.230577	1.83608	2.33399		Intergenic	5				3652.43	2.65574	5.14285e-35		4155.67	2.46453	1.41044e-41		1070.24	0.191778	0.99407		7210.2	0.146279	0.457357			YOR306C	1335.86	0.50037	0.814975	0.0204071	0.335012		YOR307C	738.804	0.261631	0.325949	-0.065709	-0.00139072
Tup.1139	chrXV	900380	900810	430		0.395413	0.372609	-0.537095	-0.946781		ORF	3	RPL20B			367.541	-1.03622	1.60428e-08		347.084	-1.69779	1.30013e-15		482.58	-0.0472355	0.99407		218.528	-0.581659	0.0152251			RPL20B	5430.72	-0.193129	-0.429437	0.172324	-0.0639847		0	#N/A	#N/A	#N/A	#N/A	#N/A
Tup.1140	chrXV	903020	903330	310		0.085371	0.00807419	0.221142	0.949671		ORF	7	SPS4			314.146	0.28816	0.296209		401.694	0.595358	0.00493967		284.985	0.0201086	0.99407		446.723	0.468203	0.0109096			SPS4	48.6888	0.404026	-0.256097	-0.342001	-1.00212		0	#N/A	#N/A	#N/A	#N/A	#N/A
Tup.1141	chrXV	903560	905150	1590		2.5313	2.4011	2.84794	2.80784		Intergenic	2	SFG1			26122.9	0.602426	0.0498339		21510.9	0.248981	0.381982		19048.7	-0.216044	0.99407		29604.6	-0.441807	0.00969317			YOR313C	48.6888	0.404026	-0.256097	-0.342001	-1.00212		YOR315W	510.568	-1.00107	-1.20161	0.050125	-0.150419
Tup.1142	chrXV	907710	908140	430		-0.0257034	0.0468045	0.610973	0.458898		ORF	7	YOR316C-A			550.837	0.887126	2.90196e-05		474.26	-0.0158059	0.946859		406.76	0.144204	0.99407		641.452	-0.621244	0.00019706			YOR316C-A	11.0195	0.418213	0.742757	-0.431855	-0.107311	2 peaks, 1 IG	0	#N/A	#N/A	#N/A	#N/A	#N/A
Tup.1143	chrXV	908320	909280	960		1.94288	1.95595	2.34366	2.78522		Intergenic	2				6032.32	0.647694	0.00930633		6741.17	0.733357	0.00355675		4592.47	-0.03383	0.99407		8522.46	0.179698	0.253649			YOR316C-A	11.0195	0.418213	0.742757	-0.431855	-0.107311	2 peaks, 1 IG	YOR317W	2789	1.05057	1.27374	-0.13027	0.0929061
Tup.1144	chrXV	911630	912620	990		1.25424	1.25365	2.35887	2.41742		Intergenic	4				4656.99	1.41932	2.74516e-11		4927.79	1.23245	2.1683e-12		2571.94	0.0704085	0.99407		7399.59	0.0140071	0.936323			YOR317W	2789	1.05057	1.27374	-0.13027	0.0929061		YOR319W	103.071	-0.0890494	-0.425411	0.0969918	-0.23937
Tup.1145	chrXV	931220	931820	600		0.941397	0.920181	0.468837	0.716527		Intergenic	1				912.334	-0.414714	0.00999414		992.452	-0.549745	0.000408152		1044.58	0.0306447	0.99407		858.558	0.0232365	0.897781			YOR327C	333.844	0.664187	0.222532	0.277837	-0.163818		YOR328W	925.187	1.62152	1.68521	-0.0659347	-0.00224636
Tup.1146	chrXV	956480	956860	380		0.419961	0.528842	-0.173097	-0.211453		ORF	8	TEA1	YOR338W		348.039	-0.546383	0.00676626		382.936	-1.0458	3.23702e-07		436.665	0.163299	0.99407		287.94	-0.204925	0.376813			TEA1	498.648	0.0473768	0.33959	0.149375	0.441589		YOR338W	136.52	1.32528	1.51244	0.362909	0.550066
Tup.1147	chrXV	967890	968580	690		1.34646	1.32177	1.31082	1.27784		Intergenic	1				2085.05	-0.0897831	0.703618		1937.3	-0.384319	0.0905775		2045.85	-0.113463	0.99407		1997.74	-0.282868	0.086973			YOR342C	595.623	0.570058	0.237949	0.319779	-0.0123302	3 peaks, 1 IG	tM(CAU)O	#N/A	#N/A	#N/A	#N/A	#N/A
Tup.1148	chrXV	974420	974800	380		0.994782	0.475889	0.956642	-0.526526		Intergenic	8				868.805	0.000272191	0.999216		453.475	-1.47774	9.81742e-14		729.743	-0.532595	0.813997		598.955	-1.87815	4.7741e-26			YOR342C	595.623	0.570058	0.237949	0.319779	-0.0123302	3 peaks, 1 IG	tM(CAU)O	#N/A	#N/A	#N/A	#N/A	#N/A
Tup.1149	chrXV	976330	976580	250		0.497264	0.47032	-0.399376	-0.614988		tRNA	3	EMT2			261.26	-0.908656	0.000397348		255.356	-1.39732	1.7875e-12		334.167	-0.0272576	0.99407		173.858	-0.382019	0.113297			YOR342C	595.623	0.570058	0.237949	0.319779	-0.0123302	3 peaks, 1 IG	tM(CAU)O	#N/A	#N/A	#N/A	#N/A	#N/A
Tup.1150	chrXV	977920	979840	1920		0.887462	0.785405	1.04085	1.34723		Intergenic	1	TYE7			5922.07	0.638096	0.000616072		6375.41	0.659615	2.47272e-05		4508.03	-0.0527515	0.99407		8115.12	0.100772	0.530785			YOR344C	390.968	0.341156	-0.334838	0.568174	-0.10782	2 peaks, 1 IG	tP(UGG)O	#N/A	#N/A	#N/A	#N/A	#N/A
Tup.1151	chrXV	980550	980880	330		0.788476	0.699288	0.0445515	0.0473242		tRNA	8	tP(UGG)O3			400.121	-0.755825	4.33116e-05		389.47	-0.997334	1.5282e-09		481.291	-0.101544	0.99407		300.92	-0.209917	0.30003			YOR344C	390.968	0.341156	-0.334838	0.568174	-0.10782	2 peaks, 1 IG	tP(UGG)O	#N/A	#N/A	#N/A	#N/A	#N/A
Tup.1152	chrXV	987110	989740	2630		2.04068	1.94048	2.12756	2.24095		Intergenic	4	PUT4			15609.1	-0.114867	0.671051		15629.3	-0.330813	0.238264		15825.2	-0.0388322	0.99407		15584.3	-0.129287	0.405864			YOR348C	984.879	1.8764	2.37065	-0.573801	-0.0795594		YOR349W	323.56	0.479387	0.286612	-0.0380349	-0.230809
Tup.1153	chrXV	1003530	1003800	270		0.38377	0.390226	-0.312048	0.00307407		Intergenic	8				287.931	-0.585378	0.00055524		311.808	-0.704755	4.46078e-05		344.932	0.0122305	0.99407		252.323	0.0237864	0.91831			YOR354C	605.521	-0.0900969	-0.0999747	-0.171189	-0.181067	2 peaks, 1 IG	YOR355W	2845.26	-0.0141804	-0.440749	-0.0687228	-0.495291
Tup.1154	chrXV	1004030	1004420	390		0.424	0.346108	-0.681667	-0.693197		Intergenic	3				339.162	-1.06478	7.35502e-08		354.226	-1.38883	7.23384e-15		457.196	0.00884566	0.99407		223.825	-0.181283	0.44488			YOR354C	605.521	-0.0900969	-0.0999747	-0.171189	-0.181067	2 peaks, 1 IG	YOR355W	2845.26	-0.0141804	-0.440749	-0.0687228	-0.495291
Tup.1155	chrXV	1006780	1007200	420		1.16359	1.13108	0.156658	-0.0330545		Intergenic	8	GDS1			648.405	-0.917763	4.20944e-07		606.432	-1.358	4.93049e-09		810.796	-0.102999	0.99407		426.958	-0.422583	0.052289			YOR355W	2845.26	-0.0141804	-0.440749	-0.0687228	-0.495291		YOR356W	1126.27	0.864224	0.778711	-0.202619	-0.288131
Tup.1156	chrXV	1018900	1019470	570		1.02777	1.1721	1.10387	1.21164		Intergenic	1				1257.04	0.309045	0.119496		1271.66	-0.216707	0.205915		1167.69	0.138951	0.99407		1386.5	-0.252988	0.101945			YOR362C	973.733	0.107149	0.115189	-0.00318984	0.00484994		YOR363C	340.019	0.236887	0.159601	0.0674372	-0.00984865
Tup.1157	chrXV	1027970	1028950	980		0.662966	0.665185	-0.327158	-0.61718		Intergenic	3	RPS12			1018.82	-1.0952	5.08248e-10		1001.07	-1.64657	4.18919e-24		1367.44	-0.0226237	0.99407		611.779	-0.439635	0.0182437			YOR369C	4990.91	-0.336165	-0.274606	-0.28819	-0.226631		YOR370C	1564.64	-0.0645768	-0.203198	-0.0688485	-0.20747
Tup.1158	chrXV	1039330	1039840	510		0.195709	0.423006	0.92995	1.16699		Intergenic	1				835.434	1.01557	1.24679e-10		869.237	0.564622	0.000233042		589.561	0.188067	0.99407		1164.61	-0.124328	0.480983			YOR373W	282.977	0.0445738	-0.572113	-0.00729799	-0.623985		YOR374W	2996.17	1.89819	2.29383	-0.293511	0.102126
Tup.1159	chrXV	1040290	1040910	620		1.2066	1.05702	1.80231	1.71034		ORF	4	ALD4			2105	1.10962	3.30787e-08		1772.48	0.539923	0.0081466		1307.16	-0.0293193	0.99407		2693.55	-0.464759	0.0133268			ALD4	2996.17	1.89819	2.29383	-0.293511	0.102126		0	#N/A	#N/A	#N/A	#N/A	#N/A
Tup.1160	chrXV	1043180	1044010	830		0.900837	0.873529	2.8455	2.93612		Intergenic	6				6147.96	2.52268	3.24431e-45		5186.15	1.99213	1.5802e-26		1835.97	0.0466124	0.99407		10146.5	-0.349903	0.0257123			YOR375C	6459.65	-0.505493	0.264526	-0.127157	0.642862		YOR376W-A	43.4822	0.448422	0.711195	-0.279626	-0.0168538
Tup.1161	chrXV	1048080	1048440	360		0.109842	0.156572	0.692386	1.234		Intergenic	7				477.334	0.795109	5.47663e-05		577.753	0.828332	3.72918e-05		360.845	0.097193	0.99407		725.866	0.268729	0.110624			YOR377W	342.859	0.464686	-0.235471	0.0689991	-0.631158	2 peaks, 1 IG	YOR378W	99.9821	1.71811	1.31968	0.0105173	-0.387918
Tup.1162	chrXV	1048850	1049520	670		1.55152	1.36314	1.59416	1.95828		Intergenic	4				2181.29	0.217845	0.340589		2520.56	0.442456	0.0490676		1954.42	-0.058181	0.99407		2835.07	0.293799	0.0444881			YOR377W	342.859	0.464686	-0.235471	0.0689991	-0.631158	2 peaks, 1 IG	YOR378W	99.9821	1.71811	1.31968	0.0105173	-0.387918
Tup.1163	chrXV	1053790	1054540	750		1.49347	1.53588	2.26122	2.6124		Intergenic	4				4473.65	1.29648	1.98765e-07		4640.66	1.13603	1.42553e-06		2580.28	0.0235482	0.99407		6876.84	-0.00407686	0.984267			YOR380W	224.971	0.612637	0.617616	0.104588	0.109567		YOR381W	236.821	0.666633	0.73376	-0.183783	-0.116656
Tup.1164	chrXV	1070360	1071140	780		-0.432087	-0.317029	0.581131	1.87525		Intergenic	5				925.001	1.23869	1.51595e-06		1784	2.01783	9.675e-11		591.72	0.195189	0.99407		2245.56	1.12424	1.15559e-14			YOR387C	10.024	2.27345	2.41499	-0.023073	0.118469		YOR388C	17.2251	3.49831	4.21355	0.0735581	0.788802
Tup.1165	chrXV	1082160	1082760	600		-0.159465	-0.0347917	1.53698	2.2755		Intergenic	5				1177.76	2.16533	1.44424e-28		1781.63	2.52658	3.643e-25		450.804	0.134642	0.99407		2679.82	0.640967	1.9618e-05			YOR393W	#N/A	#N/A	#N/A	#N/A	#N/A		YOR394W	#N/A	#N/A	#N/A	#N/A	#N/A
Tup.1166	chrXVI	8390	8980	590		-0.109112	-0.010283	1.59195	2.33166		Intergenic	5				1164.83	2.20963	3.28408e-37		1764.97	2.47314	8.78783e-22		447.994	0.219732	0.99407		2649.2	0.627164	1.53567e-05			YPL282C	#N/A	#N/A	#N/A	#N/A	#N/A		YPL281C	#N/A	#N/A	#N/A	#N/A	#N/A
Tup.1167	chrXVI	16870	17290	420		0.559821	0.641762	1.00202	1.64453		Intergenic	1				820.349	1.02926	4.73464e-10		1042.37	1.25922	2.86034e-13		542.608	0.0417296	0.99407		1390.85	0.40576	0.0277123			YPL277C	167.158	3.00889	3.39036	-0.0686629	0.312811	2 peaks, 1 IG	YPL274W	1127.22	-0.222608	0.181524	-0.344917	0.0592153
Tup.1168	chrXVI	22510	22850	340		0.543865	0.402459	0.994038	1.23208		Intergenic	1				607.557	0.774862	4.12761e-07		558.787	0.38091	0.00879362		440.106	-0.0377824	0.99407		757.15	-0.298563	0.0944013			YPL277C	167.158	3.00889	3.39036	-0.0686629	0.312811	2 peaks, 1 IG	YPL274W	1127.22	-0.222608	0.181524	-0.344917	0.0592153
Tup.1169	chrXVI	39940	40730	790		1.43907	1.42174	2.47182	2.36886		Intergenic	4	DIM1			4259.43	1.22986	2.32289e-08		3811.29	0.727263	0.000528648		2545.3	0.0293202	0.99407		5811.08	-0.347075	0.0492119			YPL266W	488.891	-0.223595	-0.404109	0.0292833	-0.151231		YPL265W	1288.92	-1.38398	-3.56665	-0.0828691	-2.26554
Tup.1170	chrXVI	56030	56430	400		0.478729	0.329932	-0.533565	-0.465573		tRNA	3	tW(CCA)P			405.542	-1.05716	2.65704e-08		396.406	-1.15816	1.99558e-12		516.289	-0.150612	0.99407		274.448	-0.119133	0.568796			YPL258C	182.26	0.242879	0.509886	-0.115468	0.15154		tW(CCA)P	50.0804	0.0528083	-0.0374828	-0.349172	-0.439463
Tup.1171	chrXVI	56670	57200	530		0.282015	0.221657	-0.0582344	0.545427		Intergenic	7				697.241	-0.277278	0.0815354		823.799	0.0320861	0.861562		745.102	-0.0634164	0.99407		789.343	0.382345	0.0196586			tW(CCA)P	50.0804	0.0528083	-0.0374828	-0.349172	-0.439463		YPL257W	99.6248	0.151885	0.109261	-0.207344	-0.249968
Tup.1172	chrXVI	66880	67400	520		0.889305	0.711954	0.300612	1.63895		Intergenic	1				875.292	-0.59752	0.000469301		1388.36	0.63987	4.79002e-05		1008.61	-0.105095	0.99407		1288.52	1.26917	6.92678e-16			YPL256C	2119.21	-0.0206054	0.331155	0.173683	0.525443		YPL255W	154.254	0.0146515	-0.720445	0.179609	-0.555487
Tup.1173	chrXVI	74910	76080	1170		0.592003	0.500976	-0.104457	0.0715696		Intergenic	8	RPL36B			1376.93	-0.605531	3.42148e-07		1539.11	-0.595406	1.31207e-08		1654.88	0.00552934	0.99407		1251.83	0.149041	0.320675			YPL250C	243.402	-0.00402909	1.68911	-0.185696	1.50744		YPL249C-A	3467.45	-0.333438	-0.509628	0.00188741	-0.174303
Tup.1174	chrXVI	113990	115160	1170		1.60259	1.54071	1.94043	2.21746		Intergenic	4	FAS2			6326.95	1.07477	3.24219e-06		6968.42	0.975563	4.73799e-05		4120.38	0.0633589	0.99407		9627.88	0.0943321	0.581917			YPL231W	25556.4	-0.43294	-0.0229232	-0.238756	0.17126		YPL230W	74.6359	2.8572	2.85289	0.0649895	0.0606831
Tup.1175	chrXVI	116590	116860	270		-0.152963	-0.276796	-0.481415	0.856837		Intergenic	7				177.231	-0.133618	0.625316		314.828	0.798197	0.00271384		195.708	0.152906	0.99407		306.121	1.22797	3.32906e-10			YPL230W	74.6359	2.8572	2.85289	0.0649895	0.0606831		YPL229W	150.441	0.50994	0.937545	0.0890695	0.516675
Tup.1176	chrXVI	131920	132810	890		0.318271	0.338292	0.556807	0.812947		Intergenic	7	FMP40			1000.09	0.342529	0.031934		1149.87	0.329582	0.00969404		895.295	0.0564714	0.99407		1296.47	0.176577	0.299997			YPL222W	314.176	1.59315	1.4877	0.0381371	-0.0673116		YPL221W	2417.49	0.874131	1.35072	-0.279971	0.196619
Tup.1177	chrXVI	136050	136350	300		0.506953	0.33683	-0.723567	-0.971617		ORF	3	RPL1A			222.769	-1.20276	2.03342e-10		219.193	-1.65901	6.28019e-09		302.765	-0.0546674	0.99407		129.635	-0.385137	0.192799			RPL1A	3509.85	-0.182271	0.00257503	-0.18877	-0.00392379		0	#N/A	#N/A	#N/A	#N/A	#N/A
Tup.1178	chrXVI	171080	171580	500		1.05527	0.98608	-0.187813	0.0364284		ORF	8	CSM4	YIG1		581.067	-1.30822	1.66886e-10		632.786	-1.23837	4.36839e-15		807.138	-0.0414282	0.99407		384.048	0.15623	0.395728			CSM4	#N/A	#N/A	#N/A	#N/A	#N/A		YIG1	15.5393	0.401614	-0.440978	0.359819	-0.482772
Tup.1179	chrXVI	173070	173940	870		0.594315	0.565222	-0.585294	-0.921312		ORF	3	RPL7B			746.85	-1.1794	8.2251e-10		737.551	-1.8424	9.22757e-15		1030.23	0.00504408	0.99407		420.339	-0.533025	0.025606			RPL7B	1565	-0.126401	-0.171414	0.151308	0.106295		0	#N/A	#N/A	#N/A	#N/A	#N/A
Tup.1180	chrXVI	183230	183700	470		-0.526559	-0.432951	-1.19746	0.94619		Intergenic	7	YPL191C			229.874	-0.603057	0.0870358		554.876	1.12535	0.00768423		295.111	0.163319	0.99407		510.268	2.05534	2.51657e-06			YPL192C	25.7595	-0.662877	5.13049	-0.691251	5.10212		YPL191C	89.8628	0.102266	0.647577	-0.314862	0.230449
Tup.1181	chrXVI	188330	189310	980		1.71102	1.67923	1.21262	1.49302		ORF	4	COA2	GUP2		3408.53	-0.54592	0.0347102		3701.3	-0.694663	0.00820637		4050.85	0.0366199	0.99407		3023.88	0.0154128	0.934003			COA2	176.141	0.779172	1.16772	-0.11212	0.276432		GUP2	169.735	3.05029	2.73744	-0.159522	-0.472367
Tup.1182	chrXVI	192910	194290	1380		-0.597598	1.04828	-1.08502	0.976043		Intergenic	7	MF(ALPHA)1			613.167	-0.467661	0.19571		3240.29	-0.0329657	0.870284		1824.49	2.04265	6.93017e-10		2005.15	2.62343	1.5133e-36			YPL188W	554.077	0.0434393	0.737822	-0.250017	0.444366		YPL187W	1964.79	0.529046	0.159611	10.0392	9.66972
Tup.1183	chrXVI	210090	210400	310		0.795865	0.520874	-0.247516	-0.483903		tRNA	8	tE(UUC)P			324.56	-0.970672	3.73747e-07		293.116	-1.25887	1.39322e-10		397.724	-0.202646	0.99407		211.778	-0.36132	0.0963886			YPL179W	2629.72	0.408858	0.592689	0.0484609	0.232292		tE(UUC)P	#N/A	#N/A	#N/A	#N/A	#N/A
Tup.1184	chrXVI	214090	216150	2060		2.24297	2.09495	2.78346	2.77137		Intergenic	2	TRE1			17503.3	0.876879	0.000897674		14773.7	0.448431	0.107097		11696.5	-0.121543	0.99407		21462.2	-0.424589	0.00363776			YPL177C	610.378	0.861823	0.951024	0.0324366	0.121638		YPL176C	954.607	0.122659	0.0393619	-0.0483228	-0.13162
Tup.1185	chrXVI	218240	218590	350		-0.413369	-0.259349	0.644511	1.36284		Intergenic	7	TRE1			380.846	1.21069	5.01468e-07		504.541	1.36477	1.11433e-07		241.906	0.134834	0.99407		679.381	0.438592	0.0132354			YPL176C	954.607	0.122659	0.0393619	-0.0483228	-0.13162		YPL175W	366.91	0.226261	0.835692	-0.0249057	0.584525
Tup.1186	chrXVI	227440	228200	760		0.643109	0.449859	0.583415	0.885397		Intergenic	1				978.301	0.135196	0.347273		1109.42	0.212554	0.0662283		923.42	-0.0107541	0.99407		1196.89	0.199111	0.213514			YPL171C	136.95	4.06846	3.68164	0.0281433	-0.358668		YPL170W	360.435	0.384976	0.60029	0.0752171	0.290532
Tup.1187	chrXVI	239020	239580	560		0.352664	0.415042	1.7882	1.92987		Intergenic	5	ATG29	MLH3		1259.04	1.73178	1.89947e-19		1335.96	1.46425	1.2507e-20		607.581	0.135314	0.99407		2104.06	0.0110796	0.962746			YPL165C	22.0415	2.45617	1.434	0.612178	-0.409989		YPL164C	104.678	-0.279492	-0.0128639	-0.179913	0.0867151
Tup.1188	chrXVI	242790	243110	320		0.0862812	0.0775781	-0.632022	0.645962		ORF	7	YPL162C			243.397	-0.494973	0.0351665		355.921	0.330887	0.0640981		283.54	-0.0070801	0.99407		322.379	0.956403	4.78868e-07			YPL162C	300.745	-0.025584	-0.563496	-0.154086	-0.691997		0	#N/A	#N/A	#N/A	#N/A	#N/A
Tup.1189	chrXVI	256860	257410	550		0.222276	0.295687	0.613803	1.40998		ORF	7	KIP2			802.806	0.666211	0.000567912		1099.94	0.848852	2.20043e-06		661.291	0.18333	0.99407		1297.85	0.505102	0.0087591			KIP2	407.985	0.107296	0.0089415	0.061813	-0.0365416		0	#N/A	#N/A	#N/A	#N/A	#N/A
Tup.1190	chrXVI	280010	280430	420		0.418247	0.390359	0.99073	1.5559		Intergenic	5				763.854	0.718034	1.69099e-05		929.143	0.971852	6.68689e-13		568.495	-0.0318596	0.99407		1179.5	0.355006	0.0528755			YPL145C	6332.06	0.352316	0.426018	-0.0711115	0.00259059		YPL144W	69.4235	0.0829574	-0.204177	-0.0635521	-0.350686
Tup.1191	chrXVI	280800	281470	670		0.38069	0.371169	-0.753702	-0.978586		ORF	3	POC4	SNR17B		540.085	-1.26285	2.12731e-12		540.881	-1.72842	2.63139e-16		750.168	-0.0290034	0.99407		306.996	-0.365934	0.111777			POC4	69.4235	0.0829574	-0.204177	-0.0635521	-0.350686		SNR17B	3266.23	-0.905915	-0.404906	-0.0984461	0.402563
Tup.1192	chrXVI	282400	282940	540		0.449912	0.307218	-0.657804	-0.938857		ORF	3	RPL33A			432.753	-1.12871	5.40552e-12		436.876	-1.77552	2.9884e-13		597.398	0.0318865	0.99407		252.914	-0.483665	0.043184			RPL33A	7768.92	0.130152	-0.219923	0.197627	-0.152449		0	#N/A	#N/A	#N/A	#N/A	#N/A
Tup.1193	chrXVI	286230	287490	1260		0.871588	0.85025	2.57205	3.30543		Intergenic	6				6617.52	2.23747	8.34983e-36		8957.12	2.63573	3.55716e-81		2258.31	-0.0463765	0.99407		14235.1	0.485586	0.00286431			YPL141C	761.081	0.281469	0.527576	0.196961	0.443068		YPL140C	284.866	-0.087801	-0.151016	-0.0896649	-0.15288
Tup.1194	chrXVI	296840	297410	570		0.831726	0.856282	1.02213	1.63589		Intergenic	1				1310.68	0.116676	0.472516		1576.56	0.271439	0.0971289		1263.71	0.0360622	0.99407		1669.23	0.325876	0.0525236			YPL137C	1489.96	0.911997	0.805566	-0.0285524	-0.134983		YPL135W	1167.87	0.511026	1.38222	-0.162178	0.709015
Tup.1195	chrXVI	303110	304090	980		0.794755	0.703322	-0.507891	-0.688485		ORF	3	RPL5			932.589	-1.30418	1.33592e-13		929.635	-1.81236	7.35721e-17		1305.55	-0.0261488	0.99407		511.813	-0.405364	0.0546748			RPL5	27849.1	-0.130916	-0.29234	-0.00509782	-0.166522		0	#N/A	#N/A	#N/A	#N/A	#N/A
Tup.1196	chrXVI	328940	329340	400		0.243995	0.290166	-0.321988	-0.394121		Intergenic	3				446.889	-0.501237	0.00974478		473.181	-1.13749	4.68225e-10		551.941	0.158446	0.99407		359.657	-0.345565	0.0992584			YPL117C	1002.46	-0.0435941	-0.228568	0.272021	0.0870473		YPL116W	710.801	-0.100974	0.213239	-0.176404	0.137809
Tup.1197	chrXVI	338710	340020	1310		0.701565	0.541521	0.524918	0.75788		tRNA	1				1858.86	-0.0178778	0.897763		1988.31	-0.0601708	0.588114		1836.57	-0.030937	0.99407		2051.05	0.0583464	0.711277			tM(CAU)P	#N/A	#N/A	#N/A	#N/A	#N/A		YPL111W	738.292	-0.538949	0.226418	-0.0519809	0.713386
Tup.1198	chrXVI	340430	341080	650		0.375823	0.305749	1.02929	1.6811		ORF	5	CAR1			1047.58	1.06106	1.14393e-16		1379.9	1.30138	2.31174e-10		693.992	0.0796254	0.99407		1829.65	0.459797	0.0239561			CAR1	738.292	-0.538949	0.226418	-0.0519809	0.713386		0	#N/A	#N/A	#N/A	#N/A	#N/A
Tup.1199	chrXVI	369200	369730	530		-0.448522	-0.501713	-0.195475	1.11201		Intergenic	7	EEB1			361.733	0.269684	0.331104		645.633	1.32106	0.000135557		329.22	0.00776892	0.99407		712.369	1.2147	1.92003e-08			YPL095C	92.1123	-0.0665192	-0.325244	0.0028103	-0.255915		YPL094C	1257.98	0.00367058	-0.28167	0.0673061	-0.218034
Tup.1200	chrXVI	373310	373600	290		-0.451041	-0.269797	0.8119	0.688531		Intergenic	7				360.192	1.40042	5.71033e-07		328.476	0.773353	0.00721694		208.062	0.128093	0.99407		506.433	-0.354172	0.0622441			YPL093W	2619.69	-0.100201	-0.486647	0.096197	-0.290249		YPL092W	356.336	1.64275	2.89351	-0.312988	0.937772
Tup.1201	chrXVI	374830	375440	610		-0.367459	-0.371779	1.66005	2.09164		Intergenic	5	SSU1			1310.54	2.38446	1.58292e-21		1505.07	2.31213	5.02435e-19		436.968	0.0974362	0.99407		2541.85	0.172645	0.286133			YPL092W	356.336	1.64275	2.89351	-0.312988	0.937772		YPL091W	1235.21	0.483678	0.713111	-0.205323	0.0241102
Tup.1202	chrXVI	377240	378000	760		0.555837	0.363426	-0.547329	-0.938796		ORF	3	RPS6A			627.547	-1.0813	2.94358e-11		588.436	-1.68635	1.89335e-13		824.498	-0.0794482	0.99407		367.922	-0.554692	0.0119806			RPS6A	2350.41	-0.363946	-0.546148	0.0269367	-0.155265		0	#N/A	#N/A	#N/A	#N/A	#N/A
Tup.1203	chrXVI	403890	406000	2110		0.772726	0.649712	-0.218119	-0.178596		Intergenic	8	RPS9A			2482.57	-0.761634	4.5358e-07		2579.68	-0.987269	1.71737e-14		3083.95	-0.0133207	0.99407		1928.51	-0.107878	0.480983			YPL082C	2594.55	0.199005	-0.177656	-0.07442	-0.45108		YPL081W	1285.32	-0.244012	-0.42758	0.11854	-0.0650282
Tup.1204	chrXVI	407010	407390	380		0.399958	0.264513	-0.857545	-1.19589		ORF	3	RPL21B			277.551	-1.09797	2.27163e-08		259.553	-1.80018	5.3704e-15		368.222	-0.0636194	0.99407		157.953	-0.632215	0.0162381			RPL21B	2686.92	-0.406244	-0.402435	-0.209513	-0.205703		0	#N/A	#N/A	#N/A	#N/A	#N/A
Tup.1205	chrXVI	420020	420290	270		-0.440122	-0.374348	0.798789	-0.691915		ORF	7	YPL071C			325.514	1.32989	8.16672e-10		181.147	-0.632178	0.0474006		191.164	0.0858736	0.99407		327.733	-1.73018	1.49402e-19			YPL071C	67.4134	0.0140547	0.367349	-0.0204467	0.332848		0	#N/A	#N/A	#N/A	#N/A	#N/A
Tup.1206	chrXVI	425200	425720	520		0.64851	0.541727	0.317186	0.479089		ORF	8	YPL067C			912.894	-0.554281	4.65325e-05		914.538	-0.681239	1.79266e-07		1043.79	-0.0964033	0.99407		779.859	-0.0929901	0.587135			YPL067C	277.703	0.381551	1.23504	-0.12488	0.728604		0	#N/A	#N/A	#N/A	#N/A	#N/A
Tup.1207	chrXVI	431630	433040	1410		1.19253	1.15964	1.36408	1.50692		Intergenic	4	ALD6			4944.11	0.63363	0.00230251		4553.35	0.179302	0.411389		3832.91	-0.00538984	0.99407		5872.56	-0.328414	0.0744144			YPL063W	1377.13	-0.249776	-0.598747	-0.106057	-0.455029		YPL061W	16751.9	-0.119262	0.0394054	-0.128614	0.0300535
Tup.1208	chrXVI	435800	436080	280		0.606946	0.412593	-0.116782	-0.535971		tRNA	8	tC(GCA)P1			282.989	-0.904314	4.18273e-07		237.894	-1.40725	9.38983e-10		337.385	-0.240953	0.99407		176.812	-0.618347	0.00947855			YPL060W	81.3053	0.0827489	0.554781	-0.259719	0.212313		tC(GCA)P	#N/A	#N/A	#N/A	#N/A	#N/A
Tup.1209	chrXVI	450620	451540	920		0.773092	0.822455	1.80494	2.69334		Intergenic	6				2861.96	1.24279	9.03066e-16		3998.96	1.65626	5.29823e-23		1705.42	0.0323062	0.99407		5458.96	0.580548	0.000665352			YPL058C	3731.26	1.03834	1.33281	0.0723669	0.366836		YPL057C	1838.91	0.84913	0.933018	0.0686174	0.152506
Tup.1210	chrXVI	453260	454470	1210		1.25648	1.13473	1.29392	1.50103		ORF	4	LCL1	LGE1		3699.98	0.398071	0.0380421		3707.95	0.241585	0.24032		3103.36	-0.0550151	0.99407		4446.08	-0.0824118	0.596534			LCL1	61.5243	0.104577	-0.258969	0.250288	-0.113258		LGE1	224.666	0.084729	-0.28164	0.0121186	-0.35425
Tup.1211	chrXVI	455100	455560	460		-0.326254	-0.20243	0.80633	0.664899		Intergenic	7				629.684	1.35973	1.41876e-08		587.089	0.740808	0.00840638		373.723	0.150907	0.99407		885.635	-0.320537	0.0425705			YPL055C	224.666	0.084729	-0.28164	0.0121186	-0.35425		YPL054W	117.746	2.64159	2.93234	0.209536	0.500291
Tup.1212	chrXVI	463590	464320	730		0.368195	0.403987	1.05212	1.68736		ORF	5	DIG1			1607.91	1.26367	1.15549e-20		1840.1	1.26863	9.02114e-14		953.604	0.0374064	0.99407		2635.13	0.182186	0.313358			DIG1	653.88	-0.0863923	-0.539036	0.136201	-0.316442		0	#N/A	#N/A	#N/A	#N/A	#N/A
Tup.1213	chrXVI	502280	503390	1110		1.64932	1.47841	1.9411	2.48553		Intergenic	4				4623.31	0.493099	0.022376		5462.54	0.790966	0.000277625		3692.34	-0.0844131	0.99407		6660.55	0.342436	0.0264282			YPL026C	520.184	0.491432	0.505105	-0.0669121	-0.0532385		YPL024W	142.357	0.598762	0.877457	0.0648162	0.343512
Tup.1214	chrXVI	510650	510940	290		0.00777241	-0.2495	0.284083	0.904748		Intergenic	7				311.954	0.519033	0.0137764		370.755	0.614196	0.00427492		259.522	0.0356528	0.99407		440.694	0.271569	0.17178			YPL022W	675.573	-0.0491731	-0.0979336	-0.186811	-0.235571		YPL021W	#N/A	#N/A	#N/A	#N/A	#N/A
Tup.1215	chrXVI	520040	520870	830		0.390097	0.336235	0.413731	0.849989		Intergenic	7	IRC15	SWI1		1043.35	0.0566412	0.685667		1196.24	0.169628	0.153781		1012.92	-0.0122262	0.99407		1258.33	0.233466	0.127332			YPL017C	74.6919	2.11506	2.39956	0.235246	0.519753		YPL016W	655.231	-0.383548	-0.526672	0.0433736	-0.0997504
Tup.1216	chrXVI	525170	525890	720		-0.168647	-0.229816	0.781675	1.27962		Intergenic	7	HST2			831.569	1.16844	8.76246e-07		1034.93	1.29748	2.84588e-08		523.835	0.0656742	0.99407		1418	0.33292	0.082648			YPL016W	655.231	-0.383548	-0.526672	0.0433736	-0.0997504		YPL015C	1140.19	0.474277	0.673502	-0.126091	0.0731343
Tup.1217	chrXVI	526840	527480	640		0.305674	0.177	1.30998	1.82767		Intergenic	5				1327.36	1.45147	2.90618e-16		1663.56	1.54106	5.75272e-22		735.296	0.104014	0.99407		2388.93	0.327606	0.061509			YPL015C	1140.19	0.474277	0.673502	-0.126091	0.0731343		YPL014W	153.966	1.16903	1.00786	0.409183	0.248014
Tup.1218	chrXVI	555890	556160	270		0.264119	0.408004	-0.624852	-1.18925		Intergenic	3				230.899	-0.864567	0.000162486		252.222	-2.07709	2.73177e-14		330.518	0.300897	0.99407		140.508	-0.78452	0.00884888			YPL001W	169.978	-0.353446	-0.0472674	-0.0681577	0.238021		YPR001W	43.0202	0.174158	1.46933	-0.0279099	1.26726
Tup.1219	chrXVI	558040	558390	350		0.480897	0.480931	-0.366123	-0.28502		Intergenic	8				383.78	-0.84288	1.10195e-05		387.725	-1.17131	1.725e-12		485.151	-0.024651	0.99407		276.817	-0.220439	0.286484			YPR001W	43.0202	0.174158	1.46933	-0.0279099	1.26726		YPR002W	176.573	1.35495	2.5061	0.115327	1.26648
Tup.1220	chrXVI	560090	560380	290		0.539255	0.389862	-0.335245	-0.439948		tRNA	3	tF(GAA)P1			297.33	-0.865503	2.87107e-05		275.191	-1.2509	1.05881e-13		363.833	-0.135622	0.99407		201.656	-0.384343	0.0969086			YPR002W	176.573	1.35495	2.5061	0.115327	1.26648		tF(GAA)P	#N/A	#N/A	#N/A	#N/A	#N/A
Tup.1221	chrXVI	566730	567340	610		0.618456	0.731047	1.50146	1.97272		Intergenic	5	HAL1	ICL2		1805.84	1.14115	4.13942e-14		2176.11	1.24853	2.21336e-15		1135.44	0.0475708	0.99407		2999.15	0.289422	0.0739968			YPR005C	317.116	1.92456	3.48857	-0.0339357	1.53007		YPR006C	119.253	0.659797	0.650289	0.0545312	0.0450228
Tup.1222	chrXVI	569180	569610	430		0.710901	0.624837	-0.250026	-0.351907		ORF	8	REC8			477.55	-0.847205	5.45154e-09		455.075	-1.37898	3.40999e-14		598.464	-0.0525791	0.99407		321.01	-0.455567	0.0206431			REC8	19.1436	1.29999	1.50444	0.364324	0.568778		0	#N/A	#N/A	#N/A	#N/A	#N/A
Tup.1223	chrXVI	572150	572580	430		0.794102	0.714866	0.142057	0.46332		tRNA	8				648.948	-0.406948	0.0143681		660.675	-0.56889	1.00864e-05		720.091	-0.0550178	0.99407		588.667	-0.0815848	0.633963			YPR007C	19.1436	1.29999	1.50444	0.364324	0.568778		tG(GCC)P	#N/A	#N/A	#N/A	#N/A	#N/A
Tup.1224	chrXVI	575110	576610	1500		1.49184	1.39175	2.86653	3.19967		Intergenic	2				12890.8	1.48493	6.84534e-09		13274	1.46076	6.34474e-09		6524.77	-0.0811754	0.99407		20771.7	0.0252551	0.888355			YPR008W	606.339	0.377368	-0.0196899	0.207834	-0.189224		YPR009W	160.756	0.891451	0.807478	-0.128854	-0.212828
Tup.1225	chrXVI	581900	582280	380		0.950387	0.844092	0.441816	-0.0505158		tRNA	8	YPR010C-A			556.697	-0.510188	0.014402		484.021	-1.21109	1.36034e-17		626.326	-0.100157	0.99407		405.95	-0.665553	0.000123203			YPR010C	8467.52	-0.0887526	-0.10361	-0.0763514	-0.0912087		tK(CUU)P	#N/A	#N/A	#N/A	#N/A	#N/A
Tup.1226	chrXVI	582870	583140	270		0.280789	0.239052	-0.497811	-0.49747		ORF	3	YPR011C			223.627	-0.706725	3.22037e-05		239.581	-1.11787	4.77903e-07		284.461	0.0848871	0.99407		173.113	-0.192235	0.438347			YPR011C	225.539	0.137667	0.192772	-0.270784	-0.215679		0	#N/A	#N/A	#N/A	#N/A	#N/A
Tup.1227	chrXVI	585670	589030	3360		1.87519	1.71677	3.35093	3.56101		Intergenic	2				43823.4	1.19656	3.34468e-05		42880.1	1.19605	1.01018e-05		24823	-0.169886	0.99407		65172.5	-0.04272	0.812591			YPR013C	179.267	0.813315	0.609652	0.121997	-0.0816664		YPR015C	96.6785	3.85775	3.46049	0.670498	0.273237
Tup.1228	chrXVI	590490	591710	1220		0.832895	0.71175	1.74786	2.39897		Intergenic	4	YPR015C			3951.47	1.06834	6.85919e-08		4955.03	1.35701	3.82335e-13		2509.45	-0.02002	0.99407		6733.3	0.401066	0.00814969			YPR015C	96.6785	3.85775	3.46049	0.670498	0.273237		YPR016C	2046.31	-0.0719832	0.121459	-0.249956	-0.0565139
Tup.1229	chrXVI	607970	608780	810		0.401443	0.343631	3.43957	3.68631		Intergenic	6				10623	4.46243	3.35187e-150		11427.8	4.31667	6.63187e-241		946.12	0.0950444	0.99407		22717.4	0.0872533	0.606621			YPR022C	589.545	-0.326095	-0.482165	0.136311	-0.019759		YPR023C	608.477	-0.0832881	-0.206538	0.0508589	-0.0723906
Tup.1230	chrXVI	615050	615440	390		-0.783654	-0.472372	-0.422328	0.856723		ORF	7	ATH1			208.785	0.358522	0.291626		383.774	1.04546	0.00216765		204.092	0.286487	0.99407		404.867	1.1273	3.80681e-09			ATH1	426.539	0.960974	1.69417	-0.170087	0.563105		0	#N/A	#N/A	#N/A	#N/A	#N/A
Tup.1231	chrXVI	619780	620210	430		0.552403	0.417527	1.51502	1.93478		Intergenic	5				967.809	1.39251	1.21214e-15		1154.75	1.46661	9.227e-28		539.795	0.0530593	0.99407		1671.3	0.265127	0.117982			YPR026W	426.539	0.960974	1.69417	-0.170087	0.563105		YPR027C	#N/A	#N/A	#N/A	#N/A	#N/A
Tup.1232	chrXVI	622450	622910	460		0.503081	0.391546	-0.0373902	-0.0336118		tRNA	8	tF(GAA)P2			498.309	-0.455193	0.0111187		474.39	-0.827824	4.0353e-09		557.149	-0.0760715	0.99407		411.369	-0.312899	0.0854778			tF(GAA)P	#N/A	#N/A	#N/A	#N/A	#N/A		YPR028W	1841.97	0.432436	0.65924	-0.154384	0.0724194
Tup.1233	chrXVI	627310	627890	580		0.569799	0.608465	1.73756	1.74256		Intergenic	5				1835.05	1.95575	7.3e-34		1586.77	1.34973	2.69294e-32		773.026	0.100516	0.99407		2807.53	-0.368467	0.0142665			YPR029C	1073.79	0.00161717	-0.136053	0.013689	-0.123981		YPR030W	297.574	2.19869	2.67664	-0.0771061	0.400846
Tup.1234	chrXVI	641180	641870	690		0.675966	0.681237	0.609441	1.00198		Intergenic	1				1251.52	0.0261433	0.846731		1387.3	-0.136699	0.249421		1266.16	0.0794817	0.99407		1395.39	0.0487455	0.751636			YPR034W	670.312	-0.234681	-0.531423	-0.0723898	-0.369132		YPR035W	3440.24	-0.313055	-0.352095	0.134029	0.0949895
Tup.1235	chrXVI	645200	645980	780		2.16374	1.99582	2.52271	2.41943		Intergenic	2	VMA13			5284.63	0.455106	0.0758934		4493.96	-0.0275423	0.927511		4236.55	-0.115492	0.99407		5718.52	-0.472123	0.00510396			YPR036W	1913.37	-0.0410009	-0.10126	-0.117357	-0.177616		YPR036W-A	2112.85	0.514801	1.06686	0.0401993	0.592258
Tup.1236	chrXVI	654490	654910	420		0.407938	0.346195	-0.792054	-1.00816		ORF	3	RPL43A			320.571	-1.1786	3.7103e-10		316.704	-1.85816	9.95238e-13		442.993	0.010436	0.99407		179.819	-0.544874	0.0460453			RPL43A	4584.68	-0.11709	-0.412961	0.0820076	-0.213864		0	#N/A	#N/A	#N/A	#N/A	#N/A
Tup.1237	chrXVI	678460	679620	1160		2.55406	2.39845	3.03264	3.6216		Intergenic	2				14172.3	0.256346	0.401889		16164	0.548414	0.0722871		12259.3	-0.114696	0.99407		18707.6	0.301607	0.0793537			YPR063C	943.234	0.603453	0.255941	0.149535	-0.197977		YPR065W	318.056	0.694179	0.334694	0.461291	0.101806
Tup.1238	chrXVI	689470	689750	280		0.609132	0.554032	-0.256525	-0.390046		tRNA	8	SUP16			301.8	-0.887142	1.12375e-05		281.776	-1.41407	1.89205e-12		377.458	-0.0805981	0.99407		197.387	-0.476129	0.0392107			YPR071W	194.184	0.140506	0.174607	0.111399	0.145499		tS(UGA)P	13.3366	0.457745	-0.000378946	0.331056	-0.127068
Tup.1239	chrXVI	694590	694920	330		0.379445	0.251282	-0.876485	-0.963333		ORF	3	TKL1			257.436	-1.1984	1.70628e-12		259.757	-1.70016	3.49793e-13		355.598	-0.00152097	0.996092		150.393	-0.378154	0.143832			TKL1	16952.1	-0.116466	0.17289	-0.136556	0.1528		0	#N/A	#N/A	#N/A	#N/A	#N/A
Tup.1240	chrXVI	695050	695500	450		0.134674	0.0953022	-0.371678	-0.138823		Intergenic	8				461.764	-0.519602	0.00579838		521.2	-0.771115	0.00013642		565.359	0.114739	0.99407		412.239	0.00283465	0.989344			YPR074C	16952.1	-0.116466	0.17289	-0.136556	0.1528		YPR075C	719.825	0.26823	0.369356	-0.0407648	0.0603614
Tup.1241	chrXVI	700070	702210	2140		0.913028	0.72389	-0.247746	-0.229168		Intergenic	8	TEF1			2536.62	-1.15791	9.78419e-10		2500.53	-1.36019	9.85759e-16		3347.96	-0.108661	0.99407		1600.85	-0.179396	0.313205			YPR079W	235.745	0.466466	0.566233	0.0272796	0.127047		YPR080W	18597.4	-0.217592	0.0639758	-0.247313	0.0342546
Tup.1242	chrXVI	718710	719360	650		0.42644	0.40317	-0.665618	-0.977374		snRNA	3	SNR70			505.589	-1.14831	2.06752e-10		510.382	-1.69788	8.08503e-18		694.871	0.00947204	0.99407		299.685	-0.409347	0.0677628			SNR70	140.668	-0.245054	0.0323942	-0.569725	-0.292277		0	#N/A	#N/A	#N/A	#N/A	#N/A
Tup.1243	chrXVI	754190	754610	420		-0.468179	-0.406729	-0.888575	0.788927		Intergenic	7	YPR114W			208.969	-0.509201	0.0684472		421.992	0.759696	0.0213205		263.192	0.190351	0.99407		379.484	1.61411	6.98092e-13			YPR114W	1424.11	0.0373042	-0.121053	-0.0655199	-0.223877		YPR115W	983.559	-0.0422501	0.357962	-0.0549942	0.345218
Tup.1244	chrXVI	769110	769420	310		0.728116	0.487948	-0.516884	-0.22381		tRNA	8	tK(UUU)P			333.426	-1.19329	1.76072e-10		351.28	-1.0498	1.48551e-10		441.849	-0.117862	0.99407		233.337	0.159928	0.449055			YPR118W	786.025	-0.202178	-0.295974	-0.0652932	-0.159089		tK(UUU)P	#N/A	#N/A	#N/A	#N/A	#N/A
Tup.1245	chrXVI	770570	771170	600		1.11497	1.0776	0.1019	0.437969		Intergenic	1				1030.21	-1.22368	1.60211e-11		1144.19	-1.18304	9.92982e-12		1425.55	-0.00609563	0.99407		711.43	0.163101	0.318543			tK(UUU)P	#N/A	#N/A	#N/A	#N/A	#N/A		YPR119W	1101.09	-0.290273	-0.225873	0.11406	0.178461
Tup.1246	chrXVI	775660	775910	250		0.542212	0.427744	-0.456684	-0.281184		tRNA	8	tC(GCA)P2			261.481	-0.917137	1.10195e-05		264.509	-1.29285	5.64519e-11		337.212	-0.0153604	0.99407		180.497	-0.259938	0.282903			YPR120C	161.194	-0.472425	-0.33196	0.12113	0.261595		tC(GCA)P	#N/A	#N/A	#N/A	#N/A	#N/A
Tup.1247	chrXVI	778150	778520	370		-0.475392	-0.37923	1.55994	1.65379		Intergenic	5	THI22			648.359	2.17601	5.25573e-15		620.692	1.66664	2.682e-07		251.1	0.174073	0.99407		1082.07	-0.180228	0.301326			tC(GCA)P	#N/A	#N/A	#N/A	#N/A	#N/A		YPR121W	143.582	-0.0142205	0.625519	-0.284942	0.354797
Tup.1248	chrXVI	781670	782130	460		-0.553448	-0.25817	0.077231	1.40547		Intergenic	7				440.347	0.709577	0.00158086		919.597	1.71257	1.68471e-07		359.799	0.199245	0.99407		1056.78	1.35946	1.91063e-12			YPR121W	143.582	-0.0142205	0.625519	-0.284942	0.354797		YPR122W	692.878	-0.332158	0.262305	-0.147871	0.446592
Tup.1249	chrXVI	785500	786010	510		0.52151	0.0662523	1.93747	0.970699		Intergenic	5	AXL1			1514.95	1.68182	1.95121e-07		754.491	0.693877	0.000252197		616.212	-0.477999	0.119877		1749.13	-1.31726	0.00365595			YPR122W	692.878	-0.332158	0.262305	-0.147871	0.446592		YPR124W	709.387	0.888397	0.210435	-0.377196	-1.05516
Tup.1250	chrXVI	789640	789930	290		0.217486	0.133093	0.828197	1.12593		Intergenic	7				431.088	0.647605	0.00238558		471.519	0.521003	0.00160829		341.525	0.0487785	0.99407		583.319	0.0625552	0.750947			YPR125W	488.823	-0.209763	-0.409402	0.115029	-0.0846097		YPR127W	267.009	0.265356	0.934605	-0.350895	0.318354
Tup.1251	chrXVI	809810	810330	520		0.53489	0.345039	0.145359	0.661954		Intergenic	8				794.182	-0.32418	0.031934		948.903	-0.0199289	0.884464		867.138	-0.039649	0.99407		889.218	0.398711	0.0138815			YPR137W	876.538	-0.219989	-0.829778	0.118283	-0.491507		tN(GUU)P	2.96037	-0.000539185	0.00390141	-0.0140297	-0.00958915
Tup.1252	chrXVI	810530	810800	270		0.578956	0.434478	-0.569189	-0.517907		tRNA	3	tN(GUU)P			276.801	-1.20256	1.12334e-11		272.743	-1.39081	1.45097e-18		368.058	-0.113525	0.99407		172.151	-0.167688	0.474084			YPR137W	876.538	-0.219989	-0.829778	0.118283	-0.491507		tN(GUU)P	2.96037	-0.000539185	0.00390141	-0.0140297	-0.00958915
Tup.1253	chrXVI	819410	819690	280		0.609321	0.439518	-0.413993	-0.588929		tRNA	3	tI(AAU)P1			280.934	-1.04065	6.55114e-09		257.46	-1.35541	1.63732e-08		353.046	-0.177721	0.99407		177.378	-0.368675	0.13586			YPR143W	261.534	-0.0506182	-0.303751	0.233733	-0.0194		tI(AAU)P	#N/A	#N/A	#N/A	#N/A	#N/A
Tup.1254	chrXVI	821670	822980	1310		0.576014	0.484121	0.313992	0.530495		snRNA	8	ASN1			1870.24	-0.0827541	0.568387		2078.79	-0.0937989	0.459106		1915.63	0.00659846	0.99407		2069.7	0.130797	0.434534			snR45	164.313	-0.359103	-0.0845397	-0.190613	0.0839511		YPR145W	7546.03	-0.605381	-0.0178513	0.125582	0.713111
Tup.1255	chrXVI	824960	825540	580		-0.303468	-0.201326	0.838346	-0.325986		Intergenic	7	YPR147C			703.153	1.24224	0.00043857		450.706	-0.471237	0.2009		443.257	0.159806	0.99407		743.302	-1.42433	0.00244576			YPR145C-A	13.8252	0.473353	2.29759	0.351877	2.17611		YPR147C	397.658	0.125647	0.26826	-0.17245	-0.0298375
Tup.1256	chrXVI	828630	829600	970		1.47202	1.3831	2.41057	2.75703		Intergenic	4				5100.12	1.23187	4.88892e-09		5405.47	1.21513	2.82082e-10		2964.6	-0.0480746	0.99407		7950.67	0.0647557	0.702907			YPR148C	1081.04	0.187283	0.3401	0.0118667	0.164684		YPR149W	5958.02	1.24948	0.808677	-0.0824753	-0.523283
Tup.1257	chrXVI	831760	832460	700		1.94295	1.60588	1.16748	0.574416		ORF	1	URN1			2109.84	-0.564178	0.0261443		1540.46	-1.22582	6.7669e-08		2212.62	-0.365397	0.99407		1419.56	-0.899475	2.0436e-10			URN1	113.496	0.132555	0.0974778	-0.179208	-0.214285		0	#N/A	#N/A	#N/A	#N/A	#N/A
Tup.1258	chrXVI	840100	841280	1180		1.37797	1.42589	2.95776	3.25805		Intergenic	2				8563.09	2.04901	1.28291e-21		9173.22	2.02198	1.2384e-24		3272.14	-0.0222912	0.99407		15408.7	0.0801468	0.621602			YPR156C	1041.99	0.479807	0.701993	-0.181301	0.0408841		YPR157W	88.3232	2.08381	1.82953	0.0981893	-0.156094
Tup.1259	chrXVI	844870	845160	290		0.10831	0.19911	-0.0901034	0.479579		Intergenic	7				303.397	-0.173784	0.345297		381.764	-0.0841118	0.693545		336.481	0.130763	0.99407		353.536	0.357907	0.0569806			YPR158W	171.504	0.289867	0.677005	-0.0680379	0.319099	2 peaks, 1 IG	tA(AGC)P	19.3998	-0.203284	5.76026	-0.846295	5.11725
Tup.1260	chrXVI	856760	857230	470		0.758266	0.590493	0.0451998	0.428124		tRNA	8				624.658	-0.523782	0.000793547		659.119	-0.553561	4.15341e-06		716.119	-0.0602345	0.99407		565.167	0.045158	0.798341			YPR158W	171.504	0.289867	0.677005	-0.0680379	0.319099	2 peaks, 1 IG	tA(AGC)P	19.3998	-0.203284	5.76026	-0.846295	5.11725
Tup.1261	chrXVI	860280	861220	940		-0.008583	-0.207154	-0.0865552	0.62582		tRNA	7				803.741	-0.0179057	0.922285		1115.93	0.528831	0.00854755		812.28	0.0185014	0.99407		1142.69	0.706362	4.71742e-06			tG(GCC)P	#N/A	#N/A	#N/A	#N/A	#N/A		YPR160W	3229.52	2.91278	3.85998	0.0584828	1.00568
Tup.1262	chrXVI	901590	901910	320		0.697869	0.65405	-0.512878	-0.0697469		ORF	8	GDB1			302.466	-0.970973	5.20762e-10		338.648	-1.10852	1.24875e-09		405.8	0.0615162	0.99407		226.001	0.051352	0.822961			GDB1	2049.75	1.79672	2.37601	0.0138303	0.593115		0	#N/A	#N/A	#N/A	#N/A	#N/A
Tup.1263	chrXVI	920660	922300	1640		0.972892	0.824039	3.02927	3.24315		Intergenic	6	AQY1	HPA2		20186.8	3.36076	2.35944e-50		19196	3.19714	6.29694e-64		3462.3	-0.0681567	0.99407		38538.5	-0.0980423	0.578236			YPR191W	1994.74	0.089603	0.568653	-0.228812	0.250239		YPR192W	133.81	4.79465	3.57078	-0.0396763	-1.26355
Tup.1264	chrXVI	927680	928720	1040		0.669098	0.659064	1.83239	2.07166		Intergenic	4				3020.78	1.30818	1.09265e-17		3068.27	1.18262	2.3066e-20		1703.02	-0.0397038	0.99407		4636.25	-0.0318125	0.860865			YPR194C	344.094	-0.79012	-1.58329	0.238592	-0.554574	2 peaks, 1 IG	YPR196W	182.577	1.39118	1.01595	0.0346024	-0.34062
Tup.1265	chrXVI	930350	931350	1000		1.39535	1.18576	2.87505	2.87476		Intergenic	6				6012.19	1.86503	7.654e-15		5623.67	1.91901	7.19879e-25		2332.37	-0.280552	0.99407		9903.71	-0.0967618	0.55549			YPR194C	344.094	-0.79012	-1.58329	0.238592	-0.554574	2 peaks, 1 IG	YPR196W	182.577	1.39118	1.01595	0.0346024	-0.34062
Tup.1266	chrXVI	933790	934150	360		-0.490519	-0.410908	1.23282	0.776539		Intergenic	7	SGE1			496.269	1.86307	1.79266e-12		400.925	0.962299	0.00540918		229.232	0.179279	0.99407		708.077	-0.574087	0.00228838			YPR196W	182.577	1.39118	1.01595	0.0346024	-0.34062		YPR198W	833.53	0.104456	0.396588	-0.0897413	0.202391
